# Supplementary material for: Depleting extracellular vesicles from fetal bovine serum alters proliferation and differentiation of skeletal muscle cells in vitro
Source: PubMed Central journal article supplement (PMC4818850; doi:10.1186/s12896-016-0262-0), 2016-04-02
Supplement: 12896_2016_262_MOESM2_ESM.pdf [file 12896_2016_262_MOESM2_ESM.pdf]

**Supplementary Table 2:** List of the 675 bovin miRNAs predicted to bind the 3'-UTR region of the murine myogenin sequence

The 3'UTR region of mouse myogenin was retrieved from Genome Browser (<https://genome.ucsc.edu>) Then the sequence was scanned for bovine miRNA binding sites by using RNAhybrid ([http://mamsap.it.deakin.edu.au/~amitkuma/mirna\\_targetsnew/sequence.html](http://mamsap.it.deakin.edu.au/~amitkuma/mirna_targetsnew/sequence.html)) which calculates the minimum free energy hybridization of a long and a short RNA, and thus effectively predict microRNA (miRNA) targets

Lower energy cutoff will be more specific and less sensitive

| Bovine miRNAs | Energy hybridization | Binding positions on mouse myogenin 3'UTR region |
|---------------|----------------------|--------------------------------------------------|
| bta-miR-26a   | -23.6                | 4                                                |
| bta-miR-26a   | -23.1                | 424                                              |
| bta-miR-26a   | -20.7                | 361                                              |
| bta-miR-26a   | -20.3                | 84                                               |
| bta-miR-26a   | -20.2                | 472                                              |
| bta-miR-26a   | -19.0                | 623                                              |
| bta-miR-26a   | -18.6                | 566                                              |
| bta-miR-26a   | -18.3                | 243                                              |
| bta-miR-26a   | -17.3                | 108                                              |
| bta-miR-26a   | -16.9                | 394                                              |
| bta-miR-26a   | -16.9                | 166                                              |
| bta-miR-26a   | -15.5                | 50                                               |
| bta-miR-26a   | -15.2                | 703                                              |
| bta-miR-26a   | -15.2                | 740                                              |
| bta-miR-26a   | -15.1                | 501                                              |
| bta-miR-26a   | -14.9                | 205                                              |
| bta-miR-26a   | -14.9                | 456                                              |
| bta-miR-26a   | -14.2                | 653                                              |
| bta-miR-26a   | -13.7                | 308                                              |
| bta-miR-26a   | -13.5                | 596                                              |
| bta-miR-26a   | -12.5                | 125                                              |
| bta-miR-26a   | -12.1                | 537                                              |
| bta-miR-26a   | -11.9                | 342                                              |
| bta-miR-26a   | -11.7                | 687                                              |
| bta-miR-26a   | -11.4                | 30                                               |
| bta-miR-26a   | -11.3                | 416                                              |
| bta-miR-26a   | -11.3                | 294                                              |
| bta-miR-26a   | -10.0                | 235                                              |
| bta-miR-18b   | -27.2                | 413                                              |
| bta-miR-18b   | -23.3                | 6                                                |
| bta-miR-18b   | -22.9                | 582                                              |
| bta-miR-18b   | -21.1                | 85                                               |
| bta-miR-18b   | -20.7                | 492                                              |
| bta-miR-18b   | -20.2                | 105                                              |
| bta-miR-18b   | -19.9                | 369                                              |
| bta-miR-18b   | -19.2                | 183                                              |
| bta-miR-18b   | -18.5                | 647                                              |
| bta-miR-18b   | -17.3                | 536                                              |
| bta-miR-18b   | -17.1                | 347                                              |
| bta-miR-18b   | -16.9                | 518                                              |
| bta-miR-18b   | -16.7                | 387                                              |
| bta-miR-18b   | -16.6                | 559                                              |
| bta-miR-18b   | -16.4                | 57                                               |
| bta-miR-18b   | -16.1                | 615                                              |
| bta-miR-18b   | -15.6                | 700                                              |

|             |       |     |
|-------------|-------|-----|
| bta-miR-18b | -15.4 | 473 |
| bta-miR-18b | -14.8 | 307 |
| bta-miR-18b | -14.3 | 739 |
| bta-miR-18b | -14.2 | 24  |
| bta-miR-18b | -14.1 | 274 |
| bta-miR-18b | -13.7 | 130 |
| bta-miR-18b | -13.5 | 235 |
| bta-miR-18b | -12.9 | 449 |
| bta-miR-18b | -12.2 | 601 |
| bta-miR-18b | -12.1 | 631 |
| bta-miR-18b | -10.8 | 252 |
| bta-miR-18b | -10.5 | 221 |
| bta-miR-18b | -10.2 | 172 |
| bta-miR-29a | -21.7 | 595 |
| bta-miR-29a | -21.6 | 340 |
| bta-miR-29a | -21.2 | 1   |
| bta-miR-29a | -20.4 | 403 |
| bta-miR-29a | -20.0 | 92  |
| bta-miR-29a | -18.7 | 563 |
| bta-miR-29a | -18.4 | 29  |
| bta-miR-29a | -18.1 | 64  |
| bta-miR-29a | -17.5 | 730 |
| bta-miR-29a | -17.0 | 432 |
| bta-miR-29a | -16.6 | 216 |
| bta-miR-29a | -16.5 | 243 |
| bta-miR-29a | -16.0 | 462 |
| bta-miR-29a | -15.7 | 183 |
| bta-miR-29a | -15.7 | 365 |
| bta-miR-29a | -14.6 | 509 |
| bta-miR-29a | -12.7 | 647 |
| bta-miR-29a | -12.4 | 626 |
| bta-miR-29a | -12.3 | 142 |
| bta-miR-29a | -11.9 | 529 |
| bta-miR-29a | -11.4 | 277 |
| bta-miR-29a | -11.0 | 700 |
| bta-miR-29a | -11.0 | 162 |
| bta-miR-29a | -10.7 | 495 |
| bta-miR-29a | -10.4 | 119 |
| bta-let-7f  | -18.9 | 456 |
| bta-let-7f  | -18.7 | 375 |
| bta-let-7f  | -17.6 | 85  |
| bta-let-7f  | -17.3 | 296 |
| bta-let-7f  | -15.7 | 648 |
| bta-let-7f  | -15.6 | 582 |
| bta-let-7f  | -15.6 | 559 |
| bta-let-7f  | -15.4 | 526 |
| bta-let-7f  | -15.3 | 171 |
| bta-let-7f  | -15.3 | 685 |
| bta-let-7f  | -15.0 | 487 |
| bta-let-7f  | -14.8 | 414 |
| bta-let-7f  | -14.6 | 738 |
| bta-let-7f  | -13.6 | 271 |
| bta-let-7f  | -13.1 | 244 |
| bta-let-7f  | -12.8 | 16  |
| bta-let-7f  | -12.7 | 122 |
| bta-let-7f  | -12.7 | 149 |
| bta-let-7f  | -12.7 | 359 |
| bta-let-7f  | -12.4 | 623 |
| bta-let-7f  | -12.3 | 199 |

|              |       |     |
|--------------|-------|-----|
| bta-let-7f   | -12.2 | 40  |
| bta-let-7f   | -11.4 | 708 |
| bta-let-7f   | -10.7 | 403 |
| bta-let-7f   | -10.6 | 61  |
| bta-let-7f   | -10.0 | 514 |
| bta-miR-101  | -18.6 | 9   |
| bta-miR-101  | -17.2 | 495 |
| bta-miR-101  | -16.5 | 50  |
| bta-miR-101  | -16.0 | 410 |
| bta-miR-101  | -15.6 | 376 |
| bta-miR-101  | -15.4 | 573 |
| bta-miR-101  | -15.0 | 545 |
| bta-miR-101  | -14.8 | 638 |
| bta-miR-101  | -14.4 | 277 |
| bta-miR-101  | -14.2 | 67  |
| bta-miR-101  | -14.0 | 100 |
| bta-miR-101  | -13.5 | 456 |
| bta-miR-101  | -13.3 | 607 |
| bta-miR-101  | -12.7 | 257 |
| bta-miR-101  | -12.3 | 140 |
| bta-miR-101  | -11.3 | 433 |
| bta-miR-101  | -11.3 | 527 |
| bta-miR-101  | -11.1 | 354 |
| bta-miR-101  | -10.5 | 200 |
| bta-miR-101  | -10.4 | 39  |
| bta-miR-101  | -10.4 | 165 |
| bta-miR-101  | -10.2 | 232 |
| bta-miR-101  | -10.2 | 597 |
| bta-miR-103  | -27.8 | 108 |
| bta-miR-103  | -23.9 | 354 |
| bta-miR-103  | -23.3 | 238 |
| bta-miR-103  | -21.6 | 469 |
| bta-miR-103  | -20.5 | 573 |
| bta-miR-103  | -20.4 | 407 |
| bta-miR-103  | -20.2 | 166 |
| bta-miR-103  | -20.0 | 50  |
| bta-miR-103  | -19.9 | 534 |
| bta-miR-103  | -19.3 | 497 |
| bta-miR-103  | -19.2 | 9   |
| bta-miR-103  | -18.6 | 429 |
| bta-miR-103  | -17.6 | 623 |
| bta-miR-103  | -17.4 | 653 |
| bta-miR-103  | -15.2 | 89  |
| bta-miR-103  | -15.1 | 277 |
| bta-miR-103  | -14.4 | 739 |
| bta-miR-103  | -13.9 | 200 |
| bta-miR-103  | -13.5 | 137 |
| bta-miR-103  | -13.5 | 683 |
| bta-miR-103  | -12.6 | 31  |
| bta-miR-103  | -12.1 | 125 |
| bta-miR-103  | -10.8 | 391 |
| bta-miR-103  | -10.6 | 328 |
| bta-miR-148a | -21.3 | 66  |
| bta-miR-148a | -20.7 | 349 |
| bta-miR-148a | -19.5 | 469 |
| bta-miR-148a | -19.5 | 535 |
| bta-miR-148a | -19.5 | 573 |
| bta-miR-148a | -19.1 | 383 |
| bta-miR-148a | -18.5 | 14  |

|              |       |     |
|--------------|-------|-----|
| bta-miR-148a | -17.4 | 606 |
| bta-miR-148a | -16.2 | 517 |
| bta-miR-148a | -15.9 | 421 |
| bta-miR-148a | -15.6 | 199 |
| bta-miR-148a | -15.2 | 552 |
| bta-miR-148a | -15.0 | 172 |
| bta-miR-148a | -14.3 | 641 |
| bta-miR-148a | -14.3 | 263 |
| bta-miR-148a | -13.3 | 733 |
| bta-miR-148a | -13.1 | 369 |
| bta-miR-148a | -12.4 | 106 |
| bta-miR-148a | -12.2 | 36  |
| bta-miR-148a | -12.2 | 660 |
| bta-miR-148a | -10.9 | 445 |
| bta-miR-148a | -10.9 | 683 |
| bta-miR-148a | -10.8 | 632 |
| bta-miR-148a | -10.5 | 59  |
| bta-miR-148a | -10.2 | 290 |
| bta-miR-148a | -10.1 | 5   |
| bta-miR-151* | -25.0 | 415 |
| bta-miR-151* | -24.3 | 13  |
| bta-miR-151* | -24.3 | 615 |
| bta-miR-151* | -22.1 | 185 |
| bta-miR-151* | -21.2 | 369 |
| bta-miR-151* | -20.8 | 269 |
| bta-miR-151* | -20.1 | 112 |
| bta-miR-151* | -19.3 | 449 |
| bta-miR-151* | -19.1 | 71  |
| bta-miR-151* | -18.9 | 498 |
| bta-miR-151* | -18.8 | 351 |
| bta-miR-151* | -18.3 | 737 |
| bta-miR-151* | -18.2 | 228 |
| bta-miR-151* | -17.0 | 154 |
| bta-miR-151* | -17.0 | 536 |
| bta-miR-151* | -16.9 | 649 |
| bta-miR-151* | -16.5 | 560 |
| bta-miR-151* | -15.7 | 702 |
| bta-miR-151* | -15.5 | 633 |
| bta-miR-151* | -14.7 | 309 |
| bta-miR-151* | -14.3 | 57  |
| bta-miR-151* | -13.8 | 586 |
| bta-miR-151* | -13.0 | 477 |
| bta-miR-151* | -12.5 | 252 |
| bta-miR-151* | -11.2 | 1   |
| bta-miR-151* | -10.9 | 520 |
| bta-miR-151* | -10.3 | 139 |
| bta-miR-151* | -10.1 | 213 |
| bta-miR-151  | -27.5 | 261 |
| bta-miR-151  | -23.7 | 67  |
| bta-miR-151  | -22.8 | 474 |
| bta-miR-151  | -22.2 | 452 |
| bta-miR-151  | -20.8 | 210 |
| bta-miR-151  | -20.0 | 169 |
| bta-miR-151  | -19.8 | 626 |
| bta-miR-151  | -18.5 | 402 |
| bta-miR-151  | -18.0 | 368 |
| bta-miR-151  | -15.6 | 192 |
| bta-miR-151  | -15.4 | 502 |
| bta-miR-151  | -15.0 | 559 |

|             |       |     |
|-------------|-------|-----|
| bta-miR-151 | -15.0 | 612 |
| bta-miR-151 | -14.9 | 9   |
| bta-miR-151 | -14.2 | 573 |
| bta-miR-151 | -13.0 | 45  |
| bta-miR-151 | -12.9 | 111 |
| bta-miR-151 | -12.6 | 703 |
| bta-miR-151 | -12.3 | 596 |
| bta-miR-151 | -12.2 | 437 |
| bta-miR-151 | -11.6 | 342 |
| bta-miR-151 | -11.6 | 309 |
| bta-miR-151 | -11.1 | 520 |
| bta-miR-151 | -10.6 | 650 |
| bta-miR-151 | -10.5 | 146 |
| bta-miR-151 | -10.4 | 86  |
| bta-miR-151 | -10.3 | 242 |
| bta-miR-16b | -19.6 | 408 |
| bta-miR-16b | -18.4 | 572 |
| bta-miR-16b | -17.4 | 483 |
| bta-miR-16b | -16.9 | 515 |
| bta-miR-16b | -16.7 | 8   |
| bta-miR-16b | -16.4 | 51  |
| bta-miR-16b | -16.3 | 669 |
| bta-miR-16b | -16.2 | 34  |
| bta-miR-16b | -16.2 | 252 |
| bta-miR-16b | -15.1 | 730 |
| bta-miR-16b | -15.0 | 109 |
| bta-miR-16b | -13.9 | 560 |
| bta-miR-16b | -13.4 | 361 |
| bta-miR-16b | -13.2 | 172 |
| bta-miR-16b | -12.6 | 605 |
| bta-miR-16b | -11.9 | 454 |
| bta-miR-16b | -11.4 | 283 |
| bta-miR-16b | -11.3 | 658 |
| bta-miR-16b | -11.0 | 126 |
| bta-miR-16b | -10.0 | 331 |
| bta-miR-18a | -27.6 | 3   |
| bta-miR-18a | -24.3 | 416 |
| bta-miR-18a | -23.4 | 582 |
| bta-miR-18a | -23.3 | 490 |
| bta-miR-18a | -20.5 | 385 |
| bta-miR-18a | -18.4 | 109 |
| bta-miR-18a | -18.3 | 87  |
| bta-miR-18a | -18.2 | 60  |
| bta-miR-18a | -17.6 | 199 |
| bta-miR-18a | -17.2 | 364 |
| bta-miR-18a | -17.1 | 550 |
| bta-miR-18a | -16.9 | 518 |
| bta-miR-18a | -16.5 | 654 |
| bta-miR-18a | -16.1 | 615 |
| bta-miR-18a | -16.1 | 695 |
| bta-miR-18a | -15.4 | 473 |
| bta-miR-18a | -15.2 | 172 |
| bta-miR-18a | -15.1 | 215 |
| bta-miR-18a | -14.9 | 257 |
| bta-miR-18a | -14.8 | 307 |
| bta-miR-18a | -14.6 | 25  |
| bta-miR-18a | -14.3 | 739 |
| bta-miR-18a | -12.9 | 449 |
| bta-miR-18a | -12.5 | 275 |

|             |       |     |
|-------------|-------|-----|
| bta-miR-18a | -12.2 | 156 |
| bta-miR-18a | -12.1 | 631 |
| bta-miR-18a | -11.6 | 344 |
| bta-miR-18a | -10.5 | 606 |
| bta-miR-18a | -10.2 | 642 |
| bta-miR-20a | -21.7 | 367 |
| bta-miR-20a | -19.7 | 425 |
| bta-miR-20a | -18.8 | 111 |
| bta-miR-20a | -18.6 | 13  |
| bta-miR-20a | -18.2 | 473 |
| bta-miR-20a | -18.2 | 579 |
| bta-miR-20a | -17.1 | 642 |
| bta-miR-20a | -17.0 | 57  |
| bta-miR-20a | -16.9 | 519 |
| bta-miR-20a | -16.0 | 385 |
| bta-miR-20a | -15.6 | 183 |
| bta-miR-20a | -14.8 | 341 |
| bta-miR-20a | -14.3 | 261 |
| bta-miR-20a | -13.5 | 139 |
| bta-miR-20a | -12.8 | 87  |
| bta-miR-20a | -12.7 | 624 |
| bta-miR-20a | -12.6 | 668 |
| bta-miR-20a | -12.5 | 561 |
| bta-miR-20a | -12.4 | 307 |
| bta-miR-20a | -11.9 | 162 |
| bta-miR-20a | -11.8 | 493 |
| bta-miR-20a | -11.7 | 204 |
| bta-miR-20a | -11.3 | 740 |
| bta-miR-20a | -10.9 | 705 |
| bta-miR-20a | -10.0 | 457 |
| bta-miR-21  | -21.9 | 44  |
| bta-miR-21  | -20.8 | 4   |
| bta-miR-21  | -20.3 | 201 |
| bta-miR-21  | -19.4 | 435 |
| bta-miR-21  | -19.2 | 379 |
| bta-miR-21  | -19.2 | 566 |
| bta-miR-21  | -17.9 | 645 |
| bta-miR-21  | -17.7 | 252 |
| bta-miR-21  | -16.8 | 601 |
| bta-miR-21  | -16.6 | 344 |
| bta-miR-21  | -16.0 | 539 |
| bta-miR-21  | -15.9 | 165 |
| bta-miR-21  | -15.6 | 730 |
| bta-miR-21  | -15.3 | 97  |
| bta-miR-21  | -14.7 | 464 |
| bta-miR-21  | -13.6 | 68  |
| bta-miR-21  | -12.6 | 229 |
| bta-miR-21  | -12.5 | 496 |
| bta-miR-21  | -11.9 | 147 |
| bta-miR-21  | -10.5 | 671 |
| bta-miR-21* | -28.7 | 106 |
| bta-miR-21* | -24.7 | 165 |
| bta-miR-21* | -23.3 | 407 |
| bta-miR-21* | -23.2 | 357 |
| bta-miR-21* | -22.8 | 1   |
| bta-miR-21* | -22.6 | 26  |
| bta-miR-21* | -21.6 | 559 |
| bta-miR-21* | -21.2 | 68  |
| bta-miR-21* | -20.9 | 228 |

|             |       |     |
|-------------|-------|-----|
| bta-miR-21* | -20.3 | 620 |
| bta-miR-21* | -20.1 | 423 |
| bta-miR-21* | -19.2 | 479 |
| bta-miR-21* | -19.0 | 129 |
| bta-miR-21* | -18.8 | 532 |
| bta-miR-21* | -16.9 | 201 |
| bta-miR-21* | -16.4 | 710 |
| bta-miR-21* | -15.8 | 265 |
| bta-miR-21* | -15.7 | 499 |
| bta-miR-21* | -15.0 | 653 |
| bta-miR-21* | -13.6 | 338 |
| bta-miR-21* | -13.3 | 308 |
| bta-miR-21* | -13.1 | 94  |
| bta-miR-21* | -13.0 | 592 |
| bta-miR-21* | -12.9 | 447 |
| bta-miR-21* | -12.8 | 687 |
| bta-miR-21* | -12.2 | 472 |
| bta-miR-21* | -11.2 | 294 |
| bta-miR-21* | -10.9 | 393 |
| bta-miR-21* | -10.6 | 320 |
| bta-miR-21* | -10.5 | 330 |
| bta-miR-221 | -29.9 | 166 |
| bta-miR-221 | -23.0 | 28  |
| bta-miR-221 | -22.3 | 361 |
| bta-miR-221 | -21.7 | 600 |
| bta-miR-221 | -21.3 | 405 |
| bta-miR-221 | -20.5 | 242 |
| bta-miR-221 | -20.5 | 481 |
| bta-miR-221 | -20.1 | 648 |
| bta-miR-221 | -19.9 | 67  |
| bta-miR-221 | -19.7 | 429 |
| bta-miR-221 | -18.9 | 188 |
| bta-miR-221 | -18.6 | 508 |
| bta-miR-221 | -18.2 | 5   |
| bta-miR-221 | -18.2 | 98  |
| bta-miR-221 | -17.0 | 119 |
| bta-miR-221 | -16.8 | 622 |
| bta-miR-221 | -16.7 | 460 |
| bta-miR-221 | -16.2 | 216 |
| bta-miR-221 | -16.0 | 273 |
| bta-miR-221 | -15.8 | 582 |
| bta-miR-221 | -15.4 | 142 |
| bta-miR-221 | -15.2 | 731 |
| bta-miR-221 | -14.3 | 339 |
| bta-miR-221 | -12.5 | 545 |
| bta-miR-221 | -11.0 | 564 |
| bta-miR-221 | -10.6 | 320 |
| bta-miR-221 | -10.3 | 391 |
| bta-miR-221 | -10.2 | 135 |
| bta-miR-222 | -27.3 | 409 |
| bta-miR-222 | -26.6 | 162 |
| bta-miR-222 | -24.2 | 30  |
| bta-miR-222 | -23.0 | 460 |
| bta-miR-222 | -22.4 | 5   |
| bta-miR-222 | -21.8 | 514 |
| bta-miR-222 | -21.1 | 262 |
| bta-miR-222 | -21.0 | 109 |
| bta-miR-222 | -20.8 | 596 |
| bta-miR-222 | -19.3 | 361 |

|                |       |     |
|----------------|-------|-----|
| bta-miR-222    | -18.8 | 67  |
| bta-miR-222    | -18.7 | 216 |
| bta-miR-222    | -18.0 | 650 |
| bta-miR-222    | -17.6 | 192 |
| bta-miR-222    | -17.4 | 236 |
| bta-miR-222    | -17.2 | 429 |
| bta-miR-222    | -16.6 | 580 |
| bta-miR-222    | -15.2 | 90  |
| bta-miR-222    | -15.1 | 542 |
| bta-miR-222    | -14.3 | 142 |
| bta-miR-222    | -14.0 | 740 |
| bta-miR-222    | -13.9 | 493 |
| bta-miR-222    | -13.1 | 247 |
| bta-miR-222    | -13.0 | 391 |
| bta-miR-222    | -12.8 | 324 |
| bta-miR-222    | -11.3 | 563 |
| bta-miR-222    | -10.9 | 669 |
| bta-miR-222    | -10.3 | 298 |
| bta-miR-222    | -10.2 | 135 |
| bta-miR-222    | -10.2 | 690 |
| bta-miR-26b    | -24.7 | 424 |
| bta-miR-26b    | -19.7 | 84  |
| bta-miR-26b    | -19.7 | 581 |
| bta-miR-26b    | -18.0 | 5   |
| bta-miR-26b    | -17.9 | 363 |
| bta-miR-26b    | -17.4 | 340 |
| bta-miR-26b    | -17.2 | 398 |
| bta-miR-26b    | -15.9 | 509 |
| bta-miR-26b    | -15.8 | 210 |
| bta-miR-26b    | -15.0 | 472 |
| bta-miR-26b    | -14.8 | 455 |
| bta-miR-26b    | -14.7 | 701 |
| bta-miR-26b    | -14.3 | 105 |
| bta-miR-26b    | -14.2 | 626 |
| bta-miR-26b    | -14.1 | 563 |
| bta-miR-26b    | -13.7 | 385 |
| bta-miR-26b    | -13.4 | 162 |
| bta-miR-26b    | -13.3 | 537 |
| bta-miR-26b    | -13.1 | 243 |
| bta-miR-26b    | -12.6 | 50  |
| bta-miR-26b    | -12.6 | 740 |
| bta-miR-26b    | -11.9 | 305 |
| bta-miR-26b    | -10.7 | 501 |
| bta-miR-26b    | -10.3 | 235 |
| bta-miR-26b    | -10.1 | 125 |
| bta-miR-27a-5p | -30.7 | 408 |
| bta-miR-27a-5p | -27.1 | 146 |
| bta-miR-27a-5p | -25.8 | 3   |
| bta-miR-27a-5p | -25.5 | 118 |
| bta-miR-27a-5p | -25.4 | 73  |
| bta-miR-27a-5p | -23.9 | 185 |
| bta-miR-27a-5p | -23.2 | 585 |
| bta-miR-27a-5p | -21.8 | 465 |
| bta-miR-27a-5p | -21.3 | 214 |
| bta-miR-27a-5p | -20.6 | 644 |
| bta-miR-27a-5p | -19.9 | 344 |
| bta-miR-27a-5p | -19.5 | 51  |
| bta-miR-27a-5p | -19.2 | 550 |
| bta-miR-27a-5p | -18.7 | 276 |



|                |       |     |
|----------------|-------|-----|
| bta-miR-27a-5p | -17.6 | 489 |
| bta-miR-27a-5p | -17.2 | 378 |
| bta-miR-27a-5p | -17.2 | 238 |
| bta-miR-27a-5p | -17.0 | 450 |
| bta-miR-27a-5p | -16.1 | 100 |
| bta-miR-27a-5p | -14.7 | 251 |
| bta-miR-27a-5p | -14.0 | 519 |
| bta-miR-27a-5p | -14.0 | 429 |
| bta-miR-27a-5p | -13.3 | 739 |
| bta-miR-27a-5p | -12.0 | 435 |
| bta-miR-27a-5p | -11.9 | 697 |
| bta-miR-27a-5p | -11.7 | 37  |
| bta-miR-27a-5p | -11.1 | 170 |
| bta-miR-27a-5p | -10.3 | 630 |
| bta-miR-27a-5p | -10.2 | 575 |
| bta-miR-27a-5p | -10.1 | 319 |
| bta-miR-27a-3p | -22.0 | 177 |
| bta-miR-27a-3p | -20.6 | 480 |
| bta-miR-27a-3p | -19.5 | 70  |
| bta-miR-27a-3p | -19.4 | 632 |
| bta-miR-27a-3p | -19.4 | 418 |
| bta-miR-27a-3p | -18.7 | 16  |
| bta-miR-27a-3p | -17.5 | 114 |
| bta-miR-27a-3p | -17.4 | 599 |
| bta-miR-27a-3p | -17.1 | 507 |
| bta-miR-27a-3p | -16.5 | 449 |
| bta-miR-27a-3p | -16.2 | 407 |
| bta-miR-27a-3p | -16.1 | 280 |
| bta-miR-27a-3p | -15.6 | 41  |
| bta-miR-27a-3p | -15.5 | 576 |
| bta-miR-27a-3p | -15.4 | 559 |
| bta-miR-27a-3p | -15.1 | 231 |
| bta-miR-27a-3p | -14.3 | 350 |
| bta-miR-27a-3p | -13.6 | 738 |
| bta-miR-27a-3p | -13.3 | 130 |
| bta-miR-27a-3p | -13.3 | 202 |
| bta-miR-27a-3p | -12.6 | 155 |
| bta-miR-27a-3p | -12.0 | 537 |
| bta-miR-27a-3p | -11.8 | 313 |
| bta-miR-27a-3p | -11.8 | 472 |
| bta-miR-27a-3p | -11.4 | 381 |
| bta-miR-27a-3p | -11.4 | 268 |
| bta-miR-27a-3p | -11.0 | 665 |
| bta-miR-27a-3p | -10.6 | 108 |
| bta-miR-27a-3p | -10.5 | 393 |
| bta-miR-27a-3p | -10.2 | 623 |
| bta-miR-27a-3p | -10.1 | 693 |
| bta-miR-30d    | -27.2 | 456 |
| bta-miR-30d    | -24.6 | 72  |
| bta-miR-30d    | -24.1 | 586 |
| bta-miR-30d    | -22.1 | 166 |
| bta-miR-30d    | -20.2 | 512 |
| bta-miR-30d    | -20.0 | 419 |
| bta-miR-30d    | -19.7 | 5   |
| bta-miR-30d    | -18.2 | 282 |
| bta-miR-30d    | -17.8 | 29  |
| bta-miR-30d    | -17.5 | 263 |
| bta-miR-30d    | -17.1 | 205 |
| bta-miR-30d    | -15.9 | 98  |

|             |       |     |
|-------------|-------|-----|
| bta-miR-30d | -15.8 | 626 |
| bta-miR-30d | -15.6 | 390 |
| bta-miR-30d | -15.2 | 358 |
| bta-miR-30d | -14.8 | 559 |
| bta-miR-30d | -14.6 | 539 |
| bta-miR-30d | -14.3 | 653 |
| bta-miR-30d | -13.6 | 403 |
| bta-miR-30d | -13.5 | 499 |
| bta-miR-30d | -13.1 | 236 |
| bta-miR-30d | -11.5 | 184 |
| bta-miR-30d | -11.3 | 58  |
| bta-miR-30d | -11.1 | 740 |
| bta-miR-30d | -10.9 | 698 |
| bta-miR-30d | -10.5 | 342 |
| bta-miR-30d | -10.4 | 316 |
| bta-miR-30d | -10.4 | 127 |
| bta-miR-30d | -10.3 | 572 |
| bta-miR-320 | -25.9 | 156 |
| bta-miR-320 | -24.1 | 96  |
| bta-miR-320 | -23.5 | 360 |
| bta-miR-320 | -22.6 | 257 |
| bta-miR-320 | -22.2 | 408 |
| bta-miR-320 | -21.1 | 474 |
| bta-miR-320 | -21.1 | 562 |
| bta-miR-320 | -20.9 | 118 |
| bta-miR-320 | -20.7 | 492 |
| bta-miR-320 | -20.2 | 51  |
| bta-miR-320 | -20.1 | 30  |
| bta-miR-320 | -18.8 | 2   |
| bta-miR-320 | -18.7 | 307 |
| bta-miR-320 | -18.7 | 624 |
| bta-miR-320 | -18.5 | 133 |
| bta-miR-320 | -18.0 | 235 |
| bta-miR-320 | -17.6 | 185 |
| bta-miR-320 | -17.2 | 388 |
| bta-miR-320 | -17.2 | 667 |
| bta-miR-320 | -17.0 | 206 |
| bta-miR-320 | -16.8 | 428 |
| bta-miR-320 | -14.4 | 644 |
| bta-miR-320 | -14.1 | 713 |
| bta-miR-320 | -13.9 | 326 |
| bta-miR-320 | -12.9 | 591 |
| bta-miR-320 | -12.8 | 88  |
| bta-miR-320 | -12.0 | 374 |
| bta-miR-320 | -11.2 | 530 |
| bta-miR-484 | -30.9 | 69  |
| bta-miR-484 | -29.9 | 412 |
| bta-miR-484 | -29.6 | 609 |
| bta-miR-484 | -25.8 | 8   |
| bta-miR-484 | -24.2 | 448 |
| bta-miR-484 | -21.0 | 263 |
| bta-miR-484 | -21.0 | 343 |
| bta-miR-484 | -21.0 | 476 |
| bta-miR-484 | -20.6 | 172 |
| bta-miR-484 | -20.0 | 220 |
| bta-miR-484 | -19.6 | 114 |
| bta-miR-484 | -16.3 | 566 |
| bta-miR-484 | -15.0 | 738 |
| bta-miR-484 | -14.8 | 631 |

|              |       |     |
|--------------|-------|-----|
| bta-miR-484  | -14.6 | 434 |
| bta-miR-484  | -14.6 | 41  |
| bta-miR-484  | -14.1 | 242 |
| bta-miR-484  | -13.9 | 369 |
| bta-miR-484  | -13.9 | 597 |
| bta-miR-484  | -13.5 | 656 |
| bta-miR-484  | -12.7 | 403 |
| bta-miR-484  | -12.1 | 536 |
| bta-miR-484  | -11.9 | 154 |
| bta-miR-484  | -11.5 | 308 |
| bta-miR-484  | -11.5 | 204 |
| bta-miR-484  | -11.3 | 710 |
| bta-miR-484  | -10.3 | 97  |
| bta-miR-499  | -19.9 | 53  |
| bta-miR-499  | -19.0 | 486 |
| bta-miR-499  | -18.7 | 383 |
| bta-miR-499  | -16.6 | 560 |
| bta-miR-499  | -16.5 | 648 |
| bta-miR-499  | -15.8 | 204 |
| bta-miR-499  | -15.8 | 600 |
| bta-miR-499  | -15.5 | 351 |
| bta-miR-499  | -14.7 | 418 |
| bta-miR-499  | -14.4 | 104 |
| bta-miR-499  | -14.3 | 84  |
| bta-miR-499  | -14.3 | 4   |
| bta-miR-499  | -14.0 | 520 |
| bta-miR-499  | -13.0 | 22  |
| bta-miR-499  | -12.8 | 178 |
| bta-miR-499  | -12.7 | 269 |
| bta-miR-499  | -12.6 | 541 |
| bta-miR-499  | -12.3 | 681 |
| bta-miR-499  | -12.0 | 297 |
| bta-miR-499  | -11.8 | 574 |
| bta-miR-499  | -11.5 | 159 |
| bta-miR-499  | -11.3 | 242 |
| bta-miR-499  | -11.1 | 471 |
| bta-miR-499  | -10.8 | 401 |
| bta-miR-499  | -10.3 | 147 |
| bta-miR-499  | -10.2 | 696 |
| bta-miR-499  | -10.1 | 233 |
| bta-miR-99a  | -27.8 | 615 |
| bta-miR-99a  | -23.5 | 494 |
| bta-miR-99a  | -18.0 | 573 |
| bta-miR-99a  | -17.9 | 443 |
| bta-miR-99a  | -17.3 | 1   |
| bta-miR-99a  | -17.3 | 66  |
| bta-miR-99a  | -15.5 | 415 |
| bta-miR-99a  | -14.7 | 476 |
| bta-miR-99a  | -14.3 | 736 |
| bta-miR-99a  | -13.8 | 35  |
| bta-miR-99a  | -13.4 | 106 |
| bta-miR-99a  | -13.3 | 202 |
| bta-miR-99a  | -12.7 | 654 |
| bta-miR-99a  | -12.7 | 702 |
| bta-miR-99a  | -12.4 | 271 |
| bta-miR-99a  | -12.3 | 373 |
| bta-miR-99a  | -12.2 | 602 |
| bta-miR-99a  | -11.6 | 172 |
| bta-miR-99a* | -22.5 | 162 |

|              |       |     |
|--------------|-------|-----|
| bta-miR-99a* | -22.4 | 60  |
| bta-miR-99a* | -21.9 | 473 |
| bta-miR-99a* | -20.8 | 361 |
| bta-miR-99a* | -20.3 | 260 |
| bta-miR-99a* | -20.0 | 429 |
| bta-miR-99a* | -19.5 | 595 |
| bta-miR-99a* | -19.3 | 408 |
| bta-miR-99a* | -18.4 | 624 |
| bta-miR-99a* | -16.7 | 98  |
| bta-miR-99a* | -16.2 | 189 |
| bta-miR-99a* | -15.6 | 13  |
| bta-miR-99a* | -15.3 | 33  |
| bta-miR-99a* | -15.1 | 208 |
| bta-miR-99a* | -14.7 | 230 |
| bta-miR-99a* | -14.3 | 330 |
| bta-miR-99a* | -13.7 | 142 |
| bta-miR-99a* | -13.5 | 79  |
| bta-miR-99a* | -13.3 | 572 |
| bta-miR-99a* | -13.1 | 514 |
| bta-miR-99a* | -12.8 | 119 |
| bta-miR-99a* | -12.0 | 489 |
| bta-miR-99a* | -11.7 | 737 |
| bta-miR-99a* | -11.4 | 552 |
| bta-miR-99a* | -11.0 | 177 |
| bta-miR-99a* | -10.9 | 649 |
| bta-miR-99a* | -10.4 | 135 |
| bta-miR-99a* | -10.4 | 324 |
| bta-miR-125a | -31.1 | 606 |
| bta-miR-125a | -22.2 | 66  |
| bta-miR-125a | -21.3 | 447 |
| bta-miR-125a | -21.1 | 264 |
| bta-miR-125a | -20.0 | 494 |
| bta-miR-125a | -19.5 | 216 |
| bta-miR-125a | -18.0 | 410 |
| bta-miR-125a | -17.3 | 10  |
| bta-miR-125a | -15.2 | 576 |
| bta-miR-125a | -14.6 | 148 |
| bta-miR-125a | -14.4 | 106 |
| bta-miR-125a | -13.4 | 382 |
| bta-miR-125a | -12.7 | 35  |
| bta-miR-125a | -12.3 | 654 |
| bta-miR-125a | -11.7 | 739 |
| bta-miR-125a | -11.4 | 199 |
| bta-miR-125a | -10.8 | 556 |
| bta-miR-125a | -10.6 | 337 |
| bta-miR-125a | -10.6 | 93  |
| bta-miR-125b | -27.2 | 606 |
| bta-miR-125b | -21.8 | 55  |
| bta-miR-125b | -21.5 | 263 |
| bta-miR-125b | -19.2 | 476 |
| bta-miR-125b | -18.4 | 33  |
| bta-miR-125b | -18.1 | 215 |
| bta-miR-125b | -17.8 | 408 |
| bta-miR-125b | -16.6 | 5   |
| bta-miR-125b | -16.2 | 434 |
| bta-miR-125b | -16.1 | 567 |
| bta-miR-125b | -15.9 | 147 |
| bta-miR-125b | -15.6 | 382 |
| bta-miR-125b | -14.2 | 121 |

|              |       |     |
|--------------|-------|-----|
| bta-miR-125b | -13.9 | 354 |
| bta-miR-125b | -13.7 | 654 |
| bta-miR-125b | -11.3 | 299 |
| bta-miR-125b | -11.2 | 373 |
| bta-miR-125b | -10.8 | 453 |
| bta-miR-125b | -10.6 | 114 |
| bta-miR-125b | -10.5 | 97  |
| bta-miR-126* | -16.1 | 565 |
| bta-miR-126* | -16.0 | 425 |
| bta-miR-126* | -15.8 | 377 |
| bta-miR-126* | -15.6 | 18  |
| bta-miR-126* | -14.8 | 618 |
| bta-miR-126* | -14.6 | 62  |
| bta-miR-126* | -14.5 | 116 |
| bta-miR-126* | -14.4 | 479 |
| bta-miR-126* | -14.3 | 546 |
| bta-miR-126* | -13.4 | 30  |
| bta-miR-126* | -13.0 | 659 |
| bta-miR-126* | -12.5 | 271 |
| bta-miR-126* | -12.4 | 518 |
| bta-miR-126* | -12.2 | 594 |
| bta-miR-126* | -12.2 | 167 |
| bta-miR-126* | -12.1 | 96  |
| bta-miR-126* | -11.8 | 359 |
| bta-miR-126* | -11.7 | 463 |
| bta-miR-126* | -11.5 | 235 |
| bta-miR-126* | -11.3 | 206 |
| bta-miR-126* | -11.2 | 126 |
| bta-miR-126* | -10.9 | 408 |
| bta-miR-126* | -10.8 | 257 |
| bta-miR-126* | -10.6 | 294 |
| bta-miR-126* | -10.6 | 341 |
| bta-miR-126* | -10.1 | 45  |
| bta-miR-126  | -16.6 | 606 |
| bta-miR-126  | -15.9 | 271 |
| bta-miR-126  | -15.7 | 465 |
| bta-miR-126  | -15.4 | 546 |
| bta-miR-126  | -15.1 | 66  |
| bta-miR-126  | -15.1 | 654 |
| bta-miR-126  | -14.8 | 488 |
| bta-miR-126  | -14.1 | 343 |
| bta-miR-126  | -13.8 | 109 |
| bta-miR-126  | -13.7 | 1   |
| bta-miR-126  | -13.7 | 408 |
| bta-miR-126  | -13.5 | 22  |
| bta-miR-126  | -13.3 | 577 |
| bta-miR-126  | -12.4 | 244 |
| bta-miR-126  | -12.3 | 206 |
| bta-miR-126  | -11.8 | 698 |
| bta-miR-126  | -11.7 | 145 |
| bta-miR-126  | -11.5 | 527 |
| bta-miR-126  | -11.1 | 292 |
| bta-miR-126  | -10.8 | 512 |
| bta-miR-126  | -10.6 | 185 |
| bta-miR-126  | -10.5 | 367 |
| bta-miR-126  | -10.1 | 738 |
| bta-miR-128  | -23.7 | 452 |
| bta-miR-128  | -22.8 | 11  |
| bta-miR-128  | -21.1 | 611 |

|              |       |     |
|--------------|-------|-----|
| bta-miR-128  | -19.8 | 737 |
| bta-miR-128  | -19.8 | 570 |
| bta-miR-128  | -19.3 | 411 |
| bta-miR-128  | -18.9 | 68  |
| bta-miR-128  | -18.5 | 348 |
| bta-miR-128  | -16.7 | 366 |
| bta-miR-128  | -16.6 | 592 |
| bta-miR-128  | -16.1 | 220 |
| bta-miR-128  | -15.8 | 506 |
| bta-miR-128  | -15.6 | 174 |
| bta-miR-128  | -15.3 | 482 |
| bta-miR-128  | -15.2 | 539 |
| bta-miR-128  | -15.2 | 440 |
| bta-miR-128  | -14.6 | 652 |
| bta-miR-128  | -13.8 | 114 |
| bta-miR-128  | -13.6 | 268 |
| bta-miR-128  | -13.4 | 423 |
| bta-miR-128  | -13.2 | 201 |
| bta-miR-128  | -13.2 | 38  |
| bta-miR-128  | -13.0 | 124 |
| bta-miR-128  | -12.8 | 242 |
| bta-miR-128  | -12.4 | 557 |
| bta-miR-128  | -11.9 | 142 |
| bta-miR-128  | -11.1 | 1   |
| bta-miR-128  | -10.7 | 338 |
| bta-miR-128  | -10.6 | 154 |
| bta-miR-128  | -10.3 | 385 |
| bta-miR-145  | -28.4 | 620 |
| bta-miR-145  | -26.9 | 83  |
| bta-miR-145  | -23.9 | 449 |
| bta-miR-145  | -23.4 | 400 |
| bta-miR-145  | -22.0 | 214 |
| bta-miR-145  | -21.4 | 575 |
| bta-miR-145  | -20.4 | 259 |
| bta-miR-145  | -19.2 | 363 |
| bta-miR-145  | -19.0 | 173 |
| bta-miR-145  | -19.0 | 1   |
| bta-miR-145  | -18.6 | 502 |
| bta-miR-145  | -18.3 | 710 |
| bta-miR-145  | -15.6 | 59  |
| bta-miR-145  | -13.8 | 431 |
| bta-miR-145  | -13.4 | 191 |
| bta-miR-145  | -12.8 | 236 |
| bta-miR-145  | -11.6 | 613 |
| bta-miR-145  | -11.6 | 638 |
| bta-miR-145  | -11.5 | 548 |
| bta-miR-145  | -10.6 | 687 |
| bta-miR-145  | -10.5 | 342 |
| bta-miR-145  | -10.1 | 145 |
| bta-miR-145  | -10.0 | 315 |
| bta-miR-181a | -21.3 | 1   |
| bta-miR-181a | -20.9 | 155 |
| bta-miR-181a | -20.1 | 594 |
| bta-miR-181a | -19.3 | 520 |
| bta-miR-181a | -18.7 | 364 |
| bta-miR-181a | -17.7 | 397 |
| bta-miR-181a | -17.3 | 256 |
| bta-miR-181a | -17.2 | 482 |
| bta-miR-181a | -17.0 | 623 |

|                 |       |     |
|-----------------|-------|-----|
| bta-miR-181a    | -16.5 | 22  |
| bta-miR-181a    | -16.5 | 59  |
| bta-miR-181a    | -16.2 | 188 |
| bta-miR-181a    | -15.8 | 425 |
| bta-miR-181a    | -15.0 | 335 |
| bta-miR-181a    | -14.9 | 95  |
| bta-miR-181a    | -14.7 | 559 |
| bta-miR-181a    | -14.2 | 274 |
| bta-miR-181a    | -13.4 | 456 |
| bta-miR-181a    | -13.4 | 130 |
| bta-miR-181a    | -13.3 | 734 |
| bta-miR-181a    | -13.1 | 116 |
| bta-miR-181a    | -13.0 | 233 |
| bta-miR-181a    | -12.5 | 695 |
| bta-miR-181a    | -11.8 | 299 |
| bta-miR-181a    | -11.6 | 211 |
| bta-miR-181a    | -10.8 | 145 |
| bta-miR-181a    | -10.7 | 441 |
| bta-miR-181a    | -10.2 | 666 |
| bta-miR-181a    | -10.1 | 319 |
| bta-miR-181a    | -10.1 | 326 |
| bta-miR-199a-5p | -25.2 | 605 |
| bta-miR-199a-5p | -22.9 | 407 |
| bta-miR-199a-5p | -22.2 | 4   |
| bta-miR-199a-5p | -22.0 | 575 |
| bta-miR-199a-5p | -21.5 | 83  |
| bta-miR-199a-5p | -18.3 | 352 |
| bta-miR-199a-5p | -17.6 | 494 |
| bta-miR-199a-5p | -17.6 | 60  |
| bta-miR-199a-5p | -17.3 | 464 |
| bta-miR-199a-5p | -16.5 | 258 |
| bta-miR-199a-5p | -15.9 | 372 |
| bta-miR-199a-5p | -15.6 | 198 |
| bta-miR-199a-5p | -14.9 | 730 |
| bta-miR-199a-5p | -14.8 | 170 |
| bta-miR-199a-5p | -14.3 | 435 |
| bta-miR-199a-5p | -14.1 | 548 |
| bta-miR-199a-5p | -13.4 | 232 |
| bta-miR-199a-5p | -13.4 | 566 |
| bta-miR-199a-5p | -12.7 | 516 |
| bta-miR-199a-5p | -12.7 | 653 |
| bta-miR-199a-5p | -11.5 | 41  |
| bta-miR-199a-5p | -11.3 | 393 |
| bta-miR-199a-5p | -11.2 | 278 |
| bta-miR-199a-5p | -11.1 | 344 |
| bta-miR-199a-5p | -11.0 | 149 |
| bta-miR-199a-5p | -10.4 | 695 |
| bta-miR-199a-5p | -10.0 | 632 |
| bta-miR-199a-3p | -25.2 | 407 |
| bta-miR-199a-3p | -23.7 | 509 |
| bta-miR-199a-3p | -22.4 | 569 |
| bta-miR-199a-3p | -21.0 | 365 |
| bta-miR-199a-3p | -20.6 | 50  |
| bta-miR-199a-3p | -19.4 | 623 |
| bta-miR-199a-3p | -18.8 | 647 |
| bta-miR-199a-3p | -18.1 | 482 |
| bta-miR-199a-3p | -17.5 | 92  |
| bta-miR-199a-3p | -17.1 | 263 |
| bta-miR-199a-3p | -17.0 | 119 |

|                 |       |     |
|-----------------|-------|-----|
| bta-miR-199a-3p | -16.8 | 187 |
| bta-miR-199a-3p | -16.6 | 1   |
| bta-miR-199a-3p | -15.1 | 340 |
| bta-miR-199a-3p | -15.0 | 544 |
| bta-miR-199a-3p | -14.6 | 229 |
| bta-miR-199a-3p | -14.5 | 723 |
| bta-miR-199a-3p | -13.9 | 81  |
| bta-miR-199a-3p | -13.7 | 143 |
| bta-miR-199a-3p | -13.6 | 34  |
| bta-miR-199a-3p | -13.4 | 456 |
| bta-miR-199a-3p | -13.0 | 601 |
| bta-miR-199a-3p | -11.7 | 166 |
| bta-miR-199a-3p | -11.3 | 670 |
| bta-miR-199a-3p | -10.8 | 688 |
| bta-miR-199a-3p | -10.4 | 359 |
| bta-miR-205     | -27.5 | 603 |
| bta-miR-205     | -23.9 | 576 |
| bta-miR-205     | -23.1 | 472 |
| bta-miR-205     | -20.5 | 624 |
| bta-miR-205     | -20.2 | 414 |
| bta-miR-205     | -19.5 | 10  |
| bta-miR-205     | -18.6 | 71  |
| bta-miR-205     | -18.0 | 128 |
| bta-miR-205     | -17.9 | 262 |
| bta-miR-205     | -17.8 | 154 |
| bta-miR-205     | -17.7 | 200 |
| bta-miR-205     | -16.5 | 454 |
| bta-miR-205     | -16.3 | 351 |
| bta-miR-205     | -15.1 | 188 |
| bta-miR-205     | -13.3 | 513 |
| bta-miR-205     | -13.0 | 114 |
| bta-miR-205     | -12.9 | 737 |
| bta-miR-205     | -12.8 | 710 |
| bta-miR-205     | -12.0 | 654 |
| bta-miR-205     | -11.5 | 138 |
| bta-miR-205     | -11.5 | 393 |
| bta-miR-205     | -11.4 | 39  |
| bta-miR-205     | -10.7 | 57  |
| bta-miR-205     | -10.3 | 327 |
| bta-miR-205     | -10.3 | 560 |
| bta-miR-205     | -10.1 | 315 |
| bta-miR-205     | -10.0 | 376 |
| bta-miR-27b     | -22.3 | 415 |
| bta-miR-27b     | -20.2 | 100 |
| bta-miR-27b     | -20.2 | 177 |
| bta-miR-27b     | -19.4 | 632 |
| bta-miR-27b     | -19.0 | 66  |
| bta-miR-27b     | -18.8 | 480 |
| bta-miR-27b     | -18.7 | 13  |
| bta-miR-27b     | -17.9 | 114 |
| bta-miR-27b     | -17.7 | 199 |
| bta-miR-27b     | -16.8 | 555 |
| bta-miR-27b     | -16.0 | 349 |
| bta-miR-27b     | -15.8 | 238 |
| bta-miR-27b     | -15.6 | 599 |
| bta-miR-27b     | -15.4 | 516 |
| bta-miR-27b     | -15.1 | 128 |
| bta-miR-27b     | -15.0 | 575 |
| bta-miR-27b     | -14.8 | 41  |



|                |       |     |
|----------------|-------|-----|
| bta-miR-27b    | -14.7 | 449 |
| bta-miR-27b    | -14.0 | 271 |
| bta-miR-27b    | -13.9 | 393 |
| bta-miR-27b    | -13.6 | 737 |
| bta-miR-27b    | -12.2 | 313 |
| bta-miR-27b    | -11.8 | 472 |
| bta-miR-27b    | -11.7 | 156 |
| bta-miR-27b    | -11.4 | 381 |
| bta-miR-27b    | -11.0 | 665 |
| bta-miR-27b    | -10.9 | 687 |
| bta-miR-27b    | -10.2 | 623 |
| bta-miR-27b    | -10.1 | 258 |
| bta-miR-30b-5p | -24.3 | 12  |
| bta-miR-30b-5p | -21.0 | 605 |
| bta-miR-30b-5p | -19.5 | 520 |
| bta-miR-30b-5p | -18.3 | 351 |
| bta-miR-30b-5p | -17.7 | 435 |
| bta-miR-30b-5p | -17.5 | 65  |
| bta-miR-30b-5p | -17.4 | 414 |
| bta-miR-30b-5p | -16.8 | 653 |
| bta-miR-30b-5p | -15.6 | 539 |
| bta-miR-30b-5p | -15.6 | 586 |
| bta-miR-30b-5p | -15.6 | 487 |
| bta-miR-30b-5p | -15.0 | 216 |
| bta-miR-30b-5p | -15.0 | 265 |
| bta-miR-30b-5p | -13.9 | 37  |
| bta-miR-30b-5p | -13.7 | 629 |
| bta-miR-30b-5p | -13.2 | 166 |
| bta-miR-30b-5p | -12.9 | 184 |
| bta-miR-30b-5p | -12.3 | 92  |
| bta-miR-30b-5p | -12.2 | 559 |
| bta-miR-30b-5p | -12.0 | 233 |
| bta-miR-30b-5p | -11.5 | 198 |
| bta-miR-30b-5p | -10.8 | 456 |
| bta-miR-30b-5p | -10.3 | 698 |
| bta-miR-30b-3p | -25.3 | 201 |
| bta-miR-30b-3p | -24.0 | 496 |
| bta-miR-30b-3p | -23.6 | 313 |
| bta-miR-30b-3p | -23.1 | 449 |
| bta-miR-30b-3p | -22.5 | 16  |
| bta-miR-30b-3p | -22.0 | 154 |
| bta-miR-30b-3p | -21.7 | 129 |
| bta-miR-30b-3p | -19.9 | 79  |
| bta-miR-30b-3p | -19.7 | 375 |
| bta-miR-30b-3p | -17.9 | 223 |
| bta-miR-30b-3p | -17.9 | 411 |
| bta-miR-30b-3p | -17.9 | 49  |
| bta-miR-30b-3p | -17.2 | 555 |
| bta-miR-30b-3p | -16.9 | 348 |
| bta-miR-30b-3p | -16.8 | 252 |
| bta-miR-30b-3p | -16.2 | 104 |
| bta-miR-30b-3p | -15.6 | 174 |
| bta-miR-30b-3p | -15.3 | 616 |
| bta-miR-30b-3p | -15.3 | 327 |
| bta-miR-30b-3p | -14.2 | 651 |
| bta-miR-30b-3p | -13.6 | 588 |
| bta-miR-30b-3p | -12.5 | 705 |
| bta-miR-30b-3p | -11.8 | 5   |
| bta-miR-30b-3p | -11.5 | 283 |

|                |       |     |
|----------------|-------|-----|
| bta-miR-30b-3p | -11.2 | 294 |
| bta-miR-30b-3p | -10.9 | 486 |
| bta-miR-30b-3p | -10.7 | 687 |
| bta-miR-30b-3p | -10.6 | 730 |
| bta-miR-30b-3p | -10.6 | 145 |
| bta-miR-30b-3p | -10.1 | 527 |
| bta-miR-31     | -25.2 | 12  |
| bta-miR-31     | -24.6 | 456 |
| bta-miR-31     | -24.2 | 408 |
| bta-miR-31     | -23.2 | 653 |
| bta-miR-31     | -20.9 | 559 |
| bta-miR-31     | -20.4 | 487 |
| bta-miR-31     | -20.2 | 155 |
| bta-miR-31     | -20.0 | 387 |
| bta-miR-31     | -20.0 | 85  |
| bta-miR-31     | -19.7 | 115 |
| bta-miR-31     | -18.7 | 38  |
| bta-miR-31     | -18.2 | 282 |
| bta-miR-31     | -18.2 | 614 |
| bta-miR-31     | -17.3 | 520 |
| bta-miR-31     | -16.1 | 344 |
| bta-miR-31     | -15.9 | 232 |
| bta-miR-31     | -15.7 | 198 |
| bta-miR-31     | -14.0 | 686 |
| bta-miR-31     | -13.5 | 256 |
| bta-miR-31     | -13.2 | 61  |
| bta-miR-31     | -12.9 | 377 |
| bta-miR-31     | -12.9 | 738 |
| bta-miR-31     | -12.6 | 630 |
| bta-miR-31     | -12.5 | 590 |
| bta-miR-31     | -12.0 | 545 |
| bta-miR-31     | -11.1 | 428 |
| bta-miR-31     | -10.9 | 2   |
| bta-miR-34b    | -22.6 | 107 |
| bta-miR-34b    | -22.4 | 8   |
| bta-miR-34b    | -22.3 | 410 |
| bta-miR-34b    | -20.5 | 544 |
| bta-miR-34b    | -19.2 | 67  |
| bta-miR-34b    | -19.0 | 452 |
| bta-miR-34b    | -18.6 | 150 |
| bta-miR-34b    | -17.2 | 170 |
| bta-miR-34b    | -16.7 | 645 |
| bta-miR-34b    | -16.1 | 37  |
| bta-miR-34b    | -16.1 | 576 |
| bta-miR-34b    | -16.0 | 351 |
| bta-miR-34b    | -15.8 | 282 |
| bta-miR-34b    | -15.0 | 516 |
| bta-miR-34b    | -14.9 | 376 |
| bta-miR-34b    | -14.9 | 487 |
| bta-miR-34b    | -14.3 | 692 |
| bta-miR-34b    | -13.9 | 198 |
| bta-miR-34b    | -13.9 | 238 |
| bta-miR-34b    | -13.3 | 737 |
| bta-miR-34b    | -13.2 | 128 |
| bta-miR-34b    | -12.9 | 662 |
| bta-miR-34b    | -12.4 | 263 |
| bta-miR-34b    | -12.2 | 623 |
| bta-miR-34b    | -10.9 | 54  |
| bta-miR-34b    | -10.4 | 311 |

|             |       |     |
|-------------|-------|-----|
| bta-miR-34b | -10.4 | 392 |
| bta-miR-106 | -23.4 | 367 |
| bta-miR-106 | -20.8 | 425 |
| bta-miR-106 | -20.6 | 111 |
| bta-miR-106 | -20.5 | 13  |
| bta-miR-106 | -20.0 | 581 |
| bta-miR-106 | -19.2 | 51  |
| bta-miR-106 | -19.0 | 473 |
| bta-miR-106 | -18.5 | 649 |
| bta-miR-106 | -18.1 | 519 |
| bta-miR-106 | -16.3 | 261 |
| bta-miR-106 | -15.7 | 192 |
| bta-miR-106 | -15.6 | 385 |
| bta-miR-106 | -14.8 | 559 |
| bta-miR-106 | -14.4 | 615 |
| bta-miR-106 | -14.1 | 341 |
| bta-miR-106 | -13.8 | 85  |
| bta-miR-106 | -13.4 | 493 |
| bta-miR-106 | -13.4 | 275 |
| bta-miR-106 | -13.2 | 543 |
| bta-miR-106 | -12.4 | 167 |
| bta-miR-106 | -11.9 | 684 |
| bta-miR-106 | -11.9 | 739 |
| bta-miR-106 | -11.6 | 307 |
| bta-miR-106 | -11.2 | 210 |
| bta-miR-106 | -11.1 | 417 |
| bta-miR-106 | -11.0 | 143 |
| bta-miR-106 | -11.0 | 249 |
| bta-miR-106 | -10.7 | 2   |
| bta-miR-106 | -10.6 | 356 |
| bta-miR-107 | -27.8 | 108 |
| bta-miR-107 | -22.5 | 361 |
| bta-miR-107 | -22.4 | 243 |
| bta-miR-107 | -20.8 | 472 |
| bta-miR-107 | -20.4 | 407 |
| bta-miR-107 | -20.2 | 166 |
| bta-miR-107 | -20.0 | 50  |
| bta-miR-107 | -19.7 | 576 |
| bta-miR-107 | -18.8 | 29  |
| bta-miR-107 | -18.8 | 546 |
| bta-miR-107 | -18.7 | 497 |
| bta-miR-107 | -18.6 | 429 |
| bta-miR-107 | -17.7 | 1   |
| bta-miR-107 | -17.6 | 623 |
| bta-miR-107 | -17.4 | 653 |
| bta-miR-107 | -15.2 | 89  |
| bta-miR-107 | -15.1 | 711 |
| bta-miR-107 | -13.5 | 282 |
| bta-miR-107 | -13.5 | 683 |
| bta-miR-107 | -13.4 | 142 |
| bta-miR-107 | -13.2 | 205 |
| bta-miR-107 | -13.1 | 19  |
| bta-miR-107 | -12.1 | 125 |
| bta-miR-107 | -11.3 | 526 |
| bta-miR-107 | -10.7 | 386 |
| bta-miR-107 | -10.6 | 328 |
| bta-miR-107 | -10.3 | 191 |
| bta-miR-107 | -10.2 | 401 |
| bta-miR-10a | -22.2 | 494 |

|             |       |     |
|-------------|-------|-----|
| bta-miR-10a | -20.8 | 586 |
| bta-miR-10a | -20.5 | 614 |
| bta-miR-10a | -18.4 | 35  |
| bta-miR-10a | -16.8 | 702 |
| bta-miR-10a | -16.2 | 454 |
| bta-miR-10a | -16.0 | 2   |
| bta-miR-10a | -15.1 | 403 |
| bta-miR-10a | -14.3 | 71  |
| bta-miR-10a | -14.1 | 271 |
| bta-miR-10a | -13.8 | 106 |
| bta-miR-10a | -13.7 | 199 |
| bta-miR-10a | -13.6 | 434 |
| bta-miR-10a | -13.4 | 382 |
| bta-miR-10a | -13.4 | 469 |
| bta-miR-10a | -13.2 | 148 |
| bta-miR-10a | -13.1 | 654 |
| bta-miR-10a | -12.4 | 224 |
| bta-miR-10a | -12.3 | 733 |
| bta-miR-10a | -12.2 | 344 |
| bta-miR-10a | -11.7 | 556 |
| bta-miR-10a | -11.0 | 86  |
| bta-miR-10a | -10.2 | 258 |
| bta-miR-127 | -31.6 | 482 |
| bta-miR-127 | -27.1 | 407 |
| bta-miR-127 | -25.9 | 65  |
| bta-miR-127 | -24.6 | 119 |
| bta-miR-127 | -23.8 | 429 |
| bta-miR-127 | -23.3 | 198 |
| bta-miR-127 | -22.5 | 166 |
| bta-miR-127 | -22.3 | 8   |
| bta-miR-127 | -22.3 | 243 |
| bta-miR-127 | -21.5 | 698 |
| bta-miR-127 | -21.1 | 603 |
| bta-miR-127 | -20.7 | 572 |
| bta-miR-127 | -18.2 | 622 |
| bta-miR-127 | -18.2 | 650 |
| bta-miR-127 | -15.6 | 29  |
| bta-miR-127 | -15.2 | 371 |
| bta-miR-127 | -14.3 | 50  |
| bta-miR-127 | -13.9 | 555 |
| bta-miR-127 | -13.6 | 331 |
| bta-miR-127 | -13.2 | 308 |
| bta-miR-127 | -13.0 | 515 |
| bta-miR-127 | -13.0 | 737 |
| bta-miR-127 | -12.9 | 97  |
| bta-miR-127 | -11.4 | 392 |
| bta-miR-127 | -11.3 | 472 |
| bta-miR-127 | -11.1 | 507 |
| bta-miR-127 | -10.8 | 154 |
| bta-miR-127 | -10.3 | 282 |
| bta-miR-139 | -27.1 | 346 |
| bta-miR-139 | -26.4 | 477 |
| bta-miR-139 | -23.1 | 628 |
| bta-miR-139 | -23.1 | 415 |
| bta-miR-139 | -23.0 | 13  |
| bta-miR-139 | -22.7 | 66  |
| bta-miR-139 | -19.7 | 504 |
| bta-miR-139 | -18.1 | 595 |
| bta-miR-139 | -17.1 | 267 |

|             |       |     |
|-------------|-------|-----|
| bta-miR-139 | -16.9 | 373 |
| bta-miR-139 | -16.6 | 737 |
| bta-miR-139 | -16.5 | 560 |
| bta-miR-139 | -16.4 | 220 |
| bta-miR-139 | -15.3 | 172 |
| bta-miR-139 | -15.2 | 112 |
| bta-miR-139 | -14.6 | 449 |
| bta-miR-139 | -14.5 | 39  |
| bta-miR-139 | -13.8 | 545 |
| bta-miR-139 | -11.8 | 527 |
| bta-miR-139 | -11.2 | 202 |
| bta-miR-139 | -11.0 | 155 |
| bta-miR-139 | -10.8 | 1   |
| bta-miR-140 | -24.9 | 416 |
| bta-miR-140 | -23.5 | 81  |
| bta-miR-140 | -23.5 | 660 |
| bta-miR-140 | -22.8 | 461 |
| bta-miR-140 | -22.0 | 618 |
| bta-miR-140 | -20.6 | 342 |
| bta-miR-140 | -20.6 | 497 |
| bta-miR-140 | -20.4 | 564 |
| bta-miR-140 | -19.3 | 247 |
| bta-miR-140 | -19.2 | 98  |
| bta-miR-140 | -18.8 | 14  |
| bta-miR-140 | -17.2 | 378 |
| bta-miR-140 | -14.9 | 541 |
| bta-miR-140 | -14.3 | 596 |
| bta-miR-140 | -14.0 | 311 |
| bta-miR-140 | -14.0 | 741 |
| bta-miR-140 | -13.5 | 209 |
| bta-miR-140 | -13.0 | 60  |
| bta-miR-140 | -13.0 | 167 |
| bta-miR-140 | -13.0 | 684 |
| bta-miR-140 | -12.7 | 276 |
| bta-miR-140 | -12.3 | 2   |
| bta-miR-140 | -12.0 | 133 |
| bta-miR-140 | -11.9 | 117 |
| bta-miR-140 | -10.8 | 327 |
| bta-miR-140 | -10.7 | 155 |
| bta-miR-140 | -10.6 | 408 |
| bta-miR-142 | -18.7 | 517 |
| bta-miR-142 | -14.9 | 280 |
| bta-miR-142 | -13.9 | 632 |
| bta-miR-142 | -13.8 | 412 |
| bta-miR-142 | -13.5 | 376 |
| bta-miR-142 | -13.4 | 584 |
| bta-miR-142 | -13.4 | 659 |
| bta-miR-142 | -13.1 | 544 |
| bta-miR-142 | -13.0 | 81  |
| bta-miR-142 | -12.9 | 11  |
| bta-miR-142 | -12.7 | 358 |
| bta-miR-142 | -12.6 | 63  |
| bta-miR-142 | -12.6 | 559 |
| bta-miR-142 | -11.8 | 241 |
| bta-miR-142 | -11.4 | 185 |
| bta-miR-142 | -11.0 | 40  |
| bta-miR-142 | -11.0 | 618 |
| bta-miR-142 | -10.7 | 741 |
| bta-miR-142 | -10.6 | 697 |

|              |       |     |
|--------------|-------|-----|
| bta-miR-142  | -10.4 | 266 |
| bta-miR-142  | -10.0 | 678 |
| bta-miR-142* | -19.3 | 4   |
| bta-miR-142* | -19.1 | 258 |
| bta-miR-142* | -18.7 | 191 |
| bta-miR-142* | -17.7 | 459 |
| bta-miR-142* | -17.4 | 60  |
| bta-miR-142* | -17.4 | 161 |
| bta-miR-142* | -16.7 | 618 |
| bta-miR-142* | -15.9 | 97  |
| bta-miR-142* | -15.9 | 401 |
| bta-miR-142* | -15.6 | 209 |
| bta-miR-142* | -15.6 | 577 |
| bta-miR-142* | -15.4 | 342 |
| bta-miR-142* | -14.8 | 436 |
| bta-miR-142* | -13.8 | 501 |
| bta-miR-142* | -13.5 | 368 |
| bta-miR-142* | -13.4 | 235 |
| bta-miR-142* | -13.1 | 729 |
| bta-miR-142* | -12.6 | 34  |
| bta-miR-142* | -12.2 | 604 |
| bta-miR-142* | -11.7 | 147 |
| bta-miR-142* | -11.3 | 384 |
| bta-miR-142* | -11.3 | 551 |
| bta-miR-142* | -10.6 | 299 |
| bta-miR-142* | -10.5 | 639 |
| bta-miR-142* | -10.4 | 514 |
| bta-miR-142* | -10.3 | 279 |
| bta-miR-15b  | -22.3 | 554 |
| bta-miR-15b  | -22.2 | 7   |
| bta-miR-15b  | -20.7 | 406 |
| bta-miR-15b  | -18.8 | 531 |
| bta-miR-15b  | -18.6 | 723 |
| bta-miR-15b  | -18.2 | 108 |
| bta-miR-15b  | -18.2 | 347 |
| bta-miR-15b  | -17.9 | 497 |
| bta-miR-15b  | -17.8 | 69  |
| bta-miR-15b  | -17.2 | 644 |
| bta-miR-15b  | -16.5 | 366 |
| bta-miR-15b  | -16.1 | 471 |
| bta-miR-15b  | -15.6 | 619 |
| bta-miR-15b  | -15.4 | 27  |
| bta-miR-15b  | -14.4 | 242 |
| bta-miR-15b  | -14.0 | 293 |
| bta-miR-15b  | -13.9 | 424 |
| bta-miR-15b  | -13.0 | 91  |
| bta-miR-15b  | -12.5 | 169 |
| bta-miR-15b  | -12.5 | 686 |
| bta-miR-15b  | -12.3 | 591 |
| bta-miR-15b  | -12.0 | 143 |
| bta-miR-15b  | -11.9 | 124 |
| bta-miR-15b  | -11.5 | 273 |
| bta-miR-15b  | -11.5 | 339 |
| bta-miR-15b  | -11.2 | 195 |
| bta-miR-181b | -24.1 | 162 |
| bta-miR-181b | -22.8 | 340 |
| bta-miR-181b | -22.4 | 472 |
| bta-miR-181b | -21.4 | 594 |
| bta-miR-181b | -20.7 | 509 |

|                 |       |     |
|-----------------|-------|-----|
| bta-miR-181b    | -20.0 | 1   |
| bta-miR-181b    | -19.6 | 424 |
| bta-miR-181b    | -18.8 | 29  |
| bta-miR-181b    | -18.7 | 50  |
| bta-miR-181b    | -18.7 | 361 |
| bta-miR-181b    | -18.5 | 563 |
| bta-miR-181b    | -17.9 | 185 |
| bta-miR-181b    | -17.8 | 108 |
| bta-miR-181b    | -17.4 | 406 |
| bta-miR-181b    | -16.9 | 623 |
| bta-miR-181b    | -16.8 | 324 |
| bta-miR-181b    | -16.8 | 208 |
| bta-miR-181b    | -16.8 | 243 |
| bta-miR-181b    | -16.4 | 260 |
| bta-miR-181b    | -15.7 | 142 |
| bta-miR-181b    | -14.2 | 120 |
| bta-miR-181b    | -14.2 | 135 |
| bta-miR-181b    | -14.0 | 274 |
| bta-miR-181b    | -13.6 | 701 |
| bta-miR-181b    | -13.5 | 317 |
| bta-miR-181b    | -13.0 | 73  |
| bta-miR-181b    | -12.8 | 739 |
| bta-miR-181b    | -12.2 | 455 |
| bta-miR-181b    | -12.2 | 306 |
| bta-miR-181b    | -12.0 | 540 |
| bta-miR-181b    | -10.1 | 386 |
| bta-miR-181b    | -10.1 | 666 |
| bta-miR-193a-5p | -23.5 | 546 |
| bta-miR-193a-5p | -23.1 | 23  |
| bta-miR-193a-5p | -22.7 | 395 |
| bta-miR-193a-5p | -22.2 | 354 |
| bta-miR-193a-5p | -21.8 | 167 |
| bta-miR-193a-5p | -21.3 | 473 |
| bta-miR-193a-5p | -20.1 | 299 |
| bta-miR-193a-5p | -20.1 | 190 |
| bta-miR-193a-5p | -20.0 | 118 |
| bta-miR-193a-5p | -19.7 | 53  |
| bta-miR-193a-5p | -19.5 | 2   |
| bta-miR-193a-5p | -19.4 | 577 |
| bta-miR-193a-5p | -19.3 | 137 |
| bta-miR-193a-5p | -18.6 | 235 |
| bta-miR-193a-5p | -18.3 | 256 |
| bta-miR-193a-5p | -17.4 | 488 |
| bta-miR-193a-5p | -17.3 | 428 |
| bta-miR-193a-5p | -17.0 | 89  |
| bta-miR-193a-5p | -16.8 | 639 |
| bta-miR-193a-5p | -16.3 | 618 |
| bta-miR-193a-5p | -15.9 | 664 |
| bta-miR-193a-5p | -15.7 | 211 |
| bta-miR-193a-5p | -15.3 | 565 |
| bta-miR-193a-5p | -14.8 | 323 |
| bta-miR-193a-5p | -14.7 | 694 |
| bta-miR-193a-5p | -14.7 | 337 |
| bta-miR-193a-5p | -13.9 | 377 |
| bta-miR-193a-5p | -13.8 | 606 |
| bta-miR-193a-5p | -13.5 | 734 |
| bta-miR-193a-5p | -12.4 | 512 |
| bta-miR-193a-5p | -12.2 | 461 |
| bta-miR-193a-5p | -11.2 | 286 |

|                 |       |     |
|-----------------|-------|-----|
| bta-miR-193a-5p | -10.3 | 744 |
| bta-miR-193a-3p | -28.2 | 13  |
| bta-miR-193a-3p | -26.5 | 66  |
| bta-miR-193a-3p | -25.2 | 415 |
| bta-miR-193a-3p | -23.2 | 112 |
| bta-miR-193a-3p | -22.2 | 606 |
| bta-miR-193a-3p | -19.9 | 477 |
| bta-miR-193a-3p | -17.2 | 364 |
| bta-miR-193a-3p | -17.1 | 267 |
| bta-miR-193a-3p | -17.1 | 449 |
| bta-miR-193a-3p | -16.3 | 216 |
| bta-miR-193a-3p | -15.6 | 560 |
| bta-miR-193a-3p | -15.1 | 649 |
| bta-miR-193a-3p | -14.0 | 176 |
| bta-miR-193a-3p | -13.9 | 41  |
| bta-miR-193a-3p | -13.8 | 154 |
| bta-miR-193a-3p | -13.7 | 520 |
| bta-miR-193a-3p | -12.7 | 739 |
| bta-miR-193a-3p | -12.1 | 595 |
| bta-miR-193a-3p | -11.4 | 2   |
| bta-miR-193a-3p | -11.3 | 96  |
| bta-miR-193a-3p | -11.0 | 166 |
| bta-miR-193a-3p | -10.9 | 683 |
| bta-miR-193a-3p | -10.7 | 241 |
| bta-miR-193a-3p | -10.1 | 706 |
| bta-miR-20b     | -26.3 | 367 |
| bta-miR-20b     | -23.0 | 13  |
| bta-miR-20b     | -23.0 | 425 |
| bta-miR-20b     | -22.4 | 537 |
| bta-miR-20b     | -21.8 | 581 |
| bta-miR-20b     | -21.4 | 649 |
| bta-miR-20b     | -20.3 | 490 |
| bta-miR-20b     | -19.6 | 111 |
| bta-miR-20b     | -19.1 | 261 |
| bta-miR-20b     | -18.3 | 602 |
| bta-miR-20b     | -18.2 | 51  |
| bta-miR-20b     | -17.9 | 473 |
| bta-miR-20b     | -16.7 | 402 |
| bta-miR-20b     | -16.5 | 192 |
| bta-miR-20b     | -15.7 | 341 |
| bta-miR-20b     | -15.3 | 85  |
| bta-miR-20b     | -14.6 | 275 |
| bta-miR-20b     | -14.1 | 167 |
| bta-miR-20b     | -13.9 | 559 |
| bta-miR-20b     | -13.3 | 385 |
| bta-miR-20b     | -13.3 | 526 |
| bta-miR-20b     | -13.1 | 210 |
| bta-miR-20b     | -12.5 | 126 |
| bta-miR-20b     | -12.4 | 449 |
| bta-miR-20b     | -11.9 | 684 |
| bta-miR-20b     | -11.9 | 739 |
| bta-miR-20b     | -11.7 | 235 |
| bta-miR-20b     | -11.6 | 307 |
| bta-miR-20b     | -10.8 | 2   |
| bta-miR-20b     | -10.6 | 631 |
| bta-miR-215     | -25.2 | 3   |
| bta-miR-215     | -18.2 | 251 |
| bta-miR-215     | -17.7 | 566 |
| bta-miR-215     | -15.5 | 60  |



|                |       |     |
|----------------|-------|-----|
| bta-miR-215    | -15.2 | 642 |
| bta-miR-215    | -14.6 | 491 |
| bta-miR-215    | -14.2 | 215 |
| bta-miR-215    | -14.0 | 25  |
| bta-miR-215    | -13.3 | 395 |
| bta-miR-215    | -13.3 | 543 |
| bta-miR-215    | -13.2 | 291 |
| bta-miR-215    | -13.1 | 82  |
| bta-miR-215    | -12.8 | 614 |
| bta-miR-215    | -12.8 | 476 |
| bta-miR-215    | -12.7 | 344 |
| bta-miR-215    | -11.6 | 583 |
| bta-miR-215    | -11.5 | 666 |
| bta-miR-215    | -11.2 | 386 |
| bta-miR-215    | -10.9 | 684 |
| bta-miR-215    | -10.7 | 436 |
| bta-miR-215    | -10.6 | 524 |
| bta-miR-215    | -10.1 | 695 |
| bta-miR-218    | -19.5 | 353 |
| bta-miR-218    | -19.0 | 587 |
| bta-miR-218    | -18.6 | 22  |
| bta-miR-218    | -18.1 | 459 |
| bta-miR-218    | -16.6 | 106 |
| bta-miR-218    | -16.5 | 8   |
| bta-miR-218    | -16.4 | 412 |
| bta-miR-218    | -16.2 | 654 |
| bta-miR-218    | -15.8 | 494 |
| bta-miR-218    | -15.3 | 66  |
| bta-miR-218    | -15.3 | 220 |
| bta-miR-218    | -14.9 | 172 |
| bta-miR-218    | -14.7 | 266 |
| bta-miR-218    | -13.3 | 201 |
| bta-miR-218    | -12.5 | 616 |
| bta-miR-218    | -12.3 | 435 |
| bta-miR-218    | -12.2 | 544 |
| bta-miR-218    | -11.7 | 739 |
| bta-miR-218    | -11.3 | 566 |
| bta-miR-218    | -10.8 | 148 |
| bta-miR-218    | -10.1 | 383 |
| bta-miR-218    | -10.0 | 702 |
| bta-miR-30e-5p | -23.1 | 456 |
| bta-miR-30e-5p | -21.2 | 166 |
| bta-miR-30e-5p | -20.7 | 512 |
| bta-miR-30e-5p | -20.1 | 5   |
| bta-miR-30e-5p | -19.7 | 586 |
| bta-miR-30e-5p | -19.2 | 72  |
| bta-miR-30e-5p | -18.6 | 205 |
| bta-miR-30e-5p | -18.2 | 282 |
| bta-miR-30e-5p | -17.8 | 403 |
| bta-miR-30e-5p | -16.4 | 358 |
| bta-miR-30e-5p | -16.4 | 559 |
| bta-miR-30e-5p | -16.0 | 29  |
| bta-miR-30e-5p | -15.7 | 435 |
| bta-miR-30e-5p | -15.3 | 390 |
| bta-miR-30e-5p | -15.3 | 115 |
| bta-miR-30e-5p | -14.6 | 539 |
| bta-miR-30e-5p | -14.6 | 236 |
| bta-miR-30e-5p | -14.3 | 653 |
| bta-miR-30e-5p | -14.2 | 626 |

|                |       |     |
|----------------|-------|-----|
| bta-miR-30e-5p | -13.7 | 263 |
| bta-miR-30e-5p | -12.8 | 637 |
| bta-miR-30e-5p | -12.5 | 98  |
| bta-miR-30e-5p | -12.4 | 58  |
| bta-miR-30e-5p | -12.3 | 499 |
| bta-miR-30e-5p | -11.9 | 143 |
| bta-miR-30e-5p | -11.8 | 184 |
| bta-miR-30e-5p | -11.7 | 342 |
| bta-miR-30e-5p | -11.6 | 698 |
| bta-miR-30e-5p | -10.5 | 222 |
| bta-miR-30e-5p | -10.4 | 316 |
| bta-miR-30e-5p | -10.4 | 127 |
| bta-miR-30e-5p | -10.1 | 713 |
| bta-miR-345-5p | -26.5 | 407 |
| bta-miR-345-5p | -25.5 | 494 |
| bta-miR-345-5p | -24.7 | 605 |
| bta-miR-345-5p | -23.5 | 108 |
| bta-miR-345-5p | -22.7 | 65  |
| bta-miR-345-5p | -22.2 | 472 |
| bta-miR-345-5p | -21.2 | 369 |
| bta-miR-345-5p | -21.1 | 4   |
| bta-miR-345-5p | -19.5 | 205 |
| bta-miR-345-5p | -19.0 | 622 |
| bta-miR-345-5p | -18.9 | 435 |
| bta-miR-345-5p | -17.6 | 270 |
| bta-miR-345-5p | -17.0 | 653 |
| bta-miR-345-5p | -16.9 | 166 |
| bta-miR-345-5p | -16.1 | 584 |
| bta-miR-345-5p | -14.6 | 739 |
| bta-miR-345-5p | -13.9 | 37  |
| bta-miR-345-5p | -13.3 | 527 |
| bta-miR-345-5p | -13.2 | 559 |
| bta-miR-345-5p | -12.2 | 384 |
| bta-miR-345-5p | -12.0 | 350 |
| bta-miR-345-5p | -11.5 | 698 |
| bta-miR-345-5p | -10.6 | 150 |
| bta-miR-345-5p | -10.4 | 263 |
| bta-miR-345-3p | -26.9 | 236 |
| bta-miR-345-3p | -23.6 | 98  |
| bta-miR-345-3p | -22.9 | 461 |
| bta-miR-345-3p | -21.3 | 127 |
| bta-miR-345-3p | -21.3 | 421 |
| bta-miR-345-3p | -21.2 | 514 |
| bta-miR-345-3p | -19.8 | 164 |
| bta-miR-345-3p | -19.6 | 356 |
| bta-miR-345-3p | -19.6 | 579 |
| bta-miR-345-3p | -19.6 | 52  |
| bta-miR-345-3p | -19.4 | 186 |
| bta-miR-345-3p | -18.7 | 317 |
| bta-miR-345-3p | -18.6 | 27  |
| bta-miR-345-3p | -18.4 | 622 |
| bta-miR-345-3p | -17.9 | 136 |
| bta-miR-345-3p | -17.2 | 401 |
| bta-miR-345-3p | -16.6 | 71  |
| bta-miR-345-3p | -16.5 | 9   |
| bta-miR-345-3p | -16.0 | 209 |
| bta-miR-345-3p | -14.6 | 635 |
| bta-miR-345-3p | -14.3 | 707 |
| bta-miR-345-3p | -13.8 | 493 |

|                |       |     |
|----------------|-------|-----|
| bta-miR-345-3p | -13.5 | 327 |
| bta-miR-345-3p | -13.4 | 567 |
| bta-miR-345-3p | -12.9 | 737 |
| bta-miR-345-3p | -12.7 | 283 |
| bta-miR-345-3p | -12.6 | 391 |
| bta-miR-345-3p | -11.9 | 331 |
| bta-miR-345-3p | -11.8 | 85  |
| bta-miR-345-3p | -11.7 | 305 |
| bta-miR-345-3p | -11.4 | 650 |
| bta-miR-345-3p | -11.0 | 542 |
| bta-miR-345-3p | -10.3 | 154 |
| bta-miR-345-3p | -10.2 | 444 |
| bta-miR-345-3p | -10.2 | 115 |
| bta-miR-345-3p | -10.1 | 41  |
| bta-miR-345-3p | -10.1 | 607 |
| bta-miR-369-5p | -18.3 | 404 |
| bta-miR-369-5p | -16.0 | 13  |
| bta-miR-369-5p | -15.9 | 730 |
| bta-miR-369-5p | -15.7 | 62  |
| bta-miR-369-5p | -14.5 | 301 |
| bta-miR-369-5p | -14.4 | 614 |
| bta-miR-369-5p | -14.3 | 450 |
| bta-miR-369-5p | -14.1 | 356 |
| bta-miR-369-5p | -14.0 | 584 |
| bta-miR-369-5p | -13.6 | 569 |
| bta-miR-369-5p | -12.8 | 81  |
| bta-miR-369-5p | -12.7 | 497 |
| bta-miR-369-5p | -12.5 | 600 |
| bta-miR-369-5p | -11.9 | 158 |
| bta-miR-369-5p | -11.8 | 335 |
| bta-miR-369-5p | -11.5 | 266 |
| bta-miR-369-5p | -10.9 | 220 |
| bta-miR-369-5p | -10.8 | 376 |
| bta-miR-369-5p | -10.8 | 653 |
| bta-miR-369-5p | -10.7 | 550 |
| bta-miR-369-5p | -10.5 | 176 |
| bta-miR-369-5p | -10.2 | 477 |
| bta-miR-369-5p | -10.1 | 102 |
| bta-miR-369-5p | -10.0 | 199 |
| bta-miR-369-3p | -18.0 | 499 |
| bta-miR-369-3p | -15.2 | 574 |
| bta-miR-369-3p | -15.2 | 16  |
| bta-miR-369-3p | -13.9 | 645 |
| bta-miR-369-3p | -13.4 | 542 |
| bta-miR-369-3p | -13.2 | 101 |
| bta-miR-369-3p | -13.2 | 226 |
| bta-miR-369-3p | -13.0 | 44  |
| bta-miR-369-3p | -12.8 | 449 |
| bta-miR-369-3p | -12.1 | 663 |
| bta-miR-369-3p | -12.1 | 407 |
| bta-miR-369-3p | -11.8 | 423 |
| bta-miR-369-3p | -11.7 | 349 |
| bta-miR-369-3p | -11.6 | 175 |
| bta-miR-369-3p | -11.5 | 239 |
| bta-miR-369-3p | -11.3 | 479 |
| bta-miR-369-3p | -11.2 | 598 |
| bta-miR-369-3p | -11.1 | 201 |
| bta-miR-369-3p | -10.9 | 371 |
| bta-miR-369-3p | -10.7 | 165 |

|                |       |     |
|----------------|-------|-----|
| bta-miR-369-3p | -10.6 | 125 |
| bta-miR-369-3p | -10.6 | 340 |
| bta-miR-369-3p | -10.5 | 557 |
| bta-miR-369-3p | -10.4 | 114 |
| bta-miR-380-5p | -23.4 | 654 |
| bta-miR-380-5p | -23.1 | 379 |
| bta-miR-380-5p | -22.5 | 20  |
| bta-miR-380-5p | -19.8 | 525 |
| bta-miR-380-5p | -18.7 | 493 |
| bta-miR-380-5p | -17.7 | 415 |
| bta-miR-380-5p | -17.5 | 252 |
| bta-miR-380-5p | -16.7 | 457 |
| bta-miR-380-5p | -16.6 | 631 |
| bta-miR-380-5p | -16.3 | 66  |
| bta-miR-380-5p | -16.3 | 206 |
| bta-miR-380-5p | -15.6 | 109 |
| bta-miR-380-5p | -14.8 | 606 |
| bta-miR-380-5p | -13.8 | 567 |
| bta-miR-380-5p | -13.2 | 359 |
| bta-miR-380-5p | -12.8 | 584 |
| bta-miR-380-5p | -12.8 | 167 |
| bta-miR-380-5p | -12.4 | 283 |
| bta-miR-380-5p | -12.1 | 3   |
| bta-miR-380-5p | -11.7 | 741 |
| bta-miR-380-5p | -11.3 | 697 |
| bta-miR-380-5p | -10.7 | 336 |
| bta-miR-380-5p | -10.3 | 88  |
| bta-miR-380-3p | -20.1 | 366 |
| bta-miR-380-3p | -19.3 | 478 |
| bta-miR-380-3p | -18.5 | 418 |
| bta-miR-380-3p | -18.1 | 11  |
| bta-miR-380-3p | -17.4 | 108 |
| bta-miR-380-3p | -17.1 | 80  |
| bta-miR-380-3p | -16.9 | 617 |
| bta-miR-380-3p | -16.4 | 497 |
| bta-miR-380-3p | -16.0 | 129 |
| bta-miR-380-3p | -15.7 | 266 |
| bta-miR-380-3p | -15.2 | 737 |
| bta-miR-380-3p | -15.1 | 660 |
| bta-miR-380-3p | -14.7 | 228 |
| bta-miR-380-3p | -14.1 | 563 |
| bta-miR-380-3p | -13.9 | 448 |
| bta-miR-380-3p | -13.9 | 25  |
| bta-miR-380-3p | -13.5 | 589 |
| bta-miR-380-3p | -12.8 | 351 |
| bta-miR-380-3p | -12.6 | 172 |
| bta-miR-380-3p | -11.6 | 66  |
| bta-miR-380-3p | -11.5 | 293 |
| bta-miR-380-3p | -10.7 | 709 |
| bta-miR-380-3p | -10.5 | 518 |
| bta-miR-380-3p | -10.2 | 644 |
| bta-miR-380-3p | -10.1 | 313 |
| bta-miR-380-3p | -10.0 | 51  |
| bta-miR-380-3p | -10.0 | 405 |
| bta-miR-487a   | -25.1 | 420 |
| bta-miR-487a   | -24.7 | 13  |
| bta-miR-487a   | -21.7 | 568 |
| bta-miR-487a   | -20.9 | 250 |
| bta-miR-487a   | -19.6 | 82  |

|              |       |     |
|--------------|-------|-----|
| bta-miR-487a | -19.3 | 616 |
| bta-miR-487a | -17.9 | 356 |
| bta-miR-487a | -17.6 | 708 |
| bta-miR-487a | -17.3 | 39  |
| bta-miR-487a | -16.8 | 231 |
| bta-miR-487a | -16.3 | 498 |
| bta-miR-487a | -15.6 | 644 |
| bta-miR-487a | -14.8 | 454 |
| bta-miR-487a | -14.7 | 477 |
| bta-miR-487a | -14.5 | 387 |
| bta-miR-487a | -14.4 | 112 |
| bta-miR-487a | -13.9 | 739 |
| bta-miR-487a | -13.9 | 542 |
| bta-miR-487a | -13.1 | 185 |
| bta-miR-487a | -12.0 | 330 |
| bta-miR-487a | -11.8 | 1   |
| bta-miR-487a | -11.7 | 280 |
| bta-miR-487a | -11.6 | 199 |
| bta-miR-487a | -11.3 | 97  |
| bta-miR-487a | -10.6 | 140 |
| bta-miR-487a | -10.6 | 155 |
| bta-miR-487a | -10.6 | 240 |
| bta-miR-487a | -10.0 | 167 |
| bta-miR-545* | -19.5 | 97  |
| bta-miR-545* | -17.3 | 484 |
| bta-miR-545* | -16.5 | 409 |
| bta-miR-545* | -16.0 | 572 |
| bta-miR-545* | -15.7 | 343 |
| bta-miR-545* | -15.7 | 459 |
| bta-miR-545* | -15.4 | 715 |
| bta-miR-545* | -15.1 | 514 |
| bta-miR-545* | -14.7 | 169 |
| bta-miR-545* | -14.3 | 235 |
| bta-miR-545* | -14.2 | 200 |
| bta-miR-545* | -13.6 | 4   |
| bta-miR-545* | -13.0 | 596 |
| bta-miR-545* | -12.6 | 645 |
| bta-miR-545* | -12.5 | 681 |
| bta-miR-545* | -12.2 | 143 |
| bta-miR-545* | -11.8 | 53  |
| bta-miR-545* | -11.7 | 368 |
| bta-miR-545* | -11.4 | 258 |
| bta-miR-545* | -11.2 | 384 |
| bta-miR-545* | -11.0 | 76  |
| bta-miR-545* | -10.9 | 495 |
| bta-miR-545* | -10.6 | 20  |
| bta-miR-545  | -16.1 | 13  |
| bta-miR-545  | -14.9 | 603 |
| bta-miR-545  | -14.5 | 71  |
| bta-miR-545  | -13.0 | 489 |
| bta-miR-545  | -12.5 | 408 |
| bta-miR-545  | -12.2 | 550 |
| bta-miR-545  | -12.0 | 369 |
| bta-miR-545  | -11.9 | 516 |
| bta-miR-545  | -11.4 | 326 |
| bta-miR-545  | -11.1 | 654 |
| bta-miR-545  | -10.9 | 732 |
| bta-miR-545  | -10.9 | 148 |
| bta-miR-545  | -10.6 | 436 |

|             |       |     |
|-------------|-------|-----|
| bta-miR-545 | -10.5 | 571 |
| bta-miR-545 | -10.4 | 351 |
| bta-miR-545 | -10.0 | 624 |
| bta-miR-92  | -31.0 | 10  |
| bta-miR-92  | -28.9 | 602 |
| bta-miR-92  | -26.0 | 358 |
| bta-miR-92  | -24.8 | 481 |
| bta-miR-92  | -24.2 | 411 |
| bta-miR-92  | -22.0 | 66  |
| bta-miR-92  | -20.5 | 114 |
| bta-miR-92  | -19.6 | 499 |
| bta-miR-92  | -19.6 | 442 |
| bta-miR-92  | -18.2 | 264 |
| bta-miR-92  | -17.7 | 575 |
| bta-miR-92  | -17.2 | 623 |
| bta-miR-92  | -15.9 | 154 |
| bta-miR-92  | -14.8 | 35  |
| bta-miR-92  | -14.0 | 199 |
| bta-miR-92  | -13.4 | 176 |
| bta-miR-92  | -13.3 | 560 |
| bta-miR-92  | -13.3 | 596 |
| bta-miR-92  | -11.9 | 737 |
| bta-miR-92  | -11.7 | 462 |
| bta-miR-92  | -11.7 | 654 |
| bta-miR-92  | -11.1 | 241 |
| bta-miR-92  | -10.9 | 86  |
| bta-miR-92  | -10.7 | 106 |
| bta-miR-92  | -10.5 | 304 |
| bta-miR-92  | -10.2 | 341 |
| bta-miR-98  | -19.0 | 106 |
| bta-miR-98  | -18.5 | 171 |
| bta-miR-98  | -16.9 | 494 |
| bta-miR-98  | -16.8 | 372 |
| bta-miR-98  | -16.7 | 410 |
| bta-miR-98  | -16.3 | 264 |
| bta-miR-98  | -16.2 | 301 |
| bta-miR-98  | -15.6 | 65  |
| bta-miR-98  | -15.6 | 697 |
| bta-miR-98  | -14.9 | 729 |
| bta-miR-98  | -14.4 | 12  |
| bta-miR-98  | -14.4 | 149 |
| bta-miR-98  | -14.3 | 560 |
| bta-miR-98  | -14.1 | 122 |
| bta-miR-98  | -13.9 | 355 |
| bta-miR-98  | -13.4 | 199 |
| bta-miR-98  | -13.3 | 516 |
| bta-miR-98  | -13.0 | 37  |
| bta-miR-98  | -12.8 | 653 |
| bta-miR-98  | -12.6 | 463 |
| bta-miR-98  | -12.4 | 584 |
| bta-miR-98  | -12.2 | 623 |
| bta-miR-98  | -10.9 | 230 |
| bta-let-7d  | -21.8 | 414 |
| bta-let-7d  | -21.1 | 375 |
| bta-let-7d  | -20.4 | 107 |
| bta-let-7d  | -19.6 | 554 |
| bta-let-7d  | -19.2 | 456 |
| bta-let-7d  | -18.0 | 656 |
| bta-let-7d  | -18.0 | 42  |

|              |       |     |
|--------------|-------|-----|
| bta-let-7d   | -17.8 | 244 |
| bta-let-7d   | -17.8 | 266 |
| bta-let-7d   | -17.7 | 697 |
| bta-let-7d   | -17.6 | 582 |
| bta-let-7d   | -17.5 | 16  |
| bta-let-7d   | -17.4 | 359 |
| bta-let-7d   | -17.0 | 487 |
| bta-let-7d   | -16.9 | 293 |
| bta-let-7d   | -16.2 | 199 |
| bta-let-7d   | -16.1 | 62  |
| bta-let-7d   | -15.8 | 183 |
| bta-let-7d   | -15.1 | 81  |
| bta-let-7d   | -15.0 | 524 |
| bta-let-7d   | -14.8 | 618 |
| bta-let-7d   | -14.4 | 729 |
| bta-let-7d   | -13.5 | 125 |
| bta-let-7d   | -13.3 | 402 |
| bta-let-7d   | -12.8 | 155 |
| bta-let-7d   | -11.4 | 336 |
| bta-miR-124a | -22.7 | 503 |
| bta-miR-124a | -22.4 | 413 |
| bta-miR-124a | -20.0 | 155 |
| bta-miR-124a | -19.7 | 39  |
| bta-miR-124a | -19.4 | 17  |
| bta-miR-124a | -19.0 | 654 |
| bta-miR-124a | -18.9 | 370 |
| bta-miR-124a | -18.8 | 542 |
| bta-miR-124a | -18.8 | 605 |
| bta-miR-124a | -18.6 | 115 |
| bta-miR-124a | -18.4 | 576 |
| bta-miR-124a | -18.2 | 341 |
| bta-miR-124a | -18.0 | 464 |
| bta-miR-124a | -17.9 | 85  |
| bta-miR-124a | -17.7 | 488 |
| bta-miR-124a | -17.1 | 177 |
| bta-miR-124a | -16.5 | 685 |
| bta-miR-124a | -16.0 | 231 |
| bta-miR-124a | -15.7 | 299 |
| bta-miR-124a | -15.3 | 270 |
| bta-miR-124a | -14.6 | 400 |
| bta-miR-124a | -13.9 | 1   |
| bta-miR-124a | -13.7 | 594 |
| bta-miR-124a | -13.4 | 739 |
| bta-miR-124a | -13.2 | 144 |
| bta-miR-124a | -12.0 | 199 |
| bta-miR-124a | -11.7 | 708 |
| bta-miR-124a | -11.6 | 315 |
| bta-miR-124a | -11.6 | 532 |
| bta-miR-124a | -11.5 | 631 |
| bta-miR-124a | -11.4 | 565 |
| bta-miR-124a | -11.3 | 384 |
| bta-miR-124a | -10.7 | 326 |
| bta-miR-124a | -10.4 | 448 |
| bta-miR-132  | -25.8 | 408 |
| bta-miR-132  | -22.6 | 570 |
| bta-miR-132  | -20.3 | 9   |
| bta-miR-132  | -20.3 | 366 |
| bta-miR-132  | -20.1 | 72  |
| bta-miR-132  | -19.8 | 482 |

|              |       |     |
|--------------|-------|-----|
| bta-miR-132  | -19.7 | 109 |
| bta-miR-132  | -18.9 | 525 |
| bta-miR-132  | -18.5 | 605 |
| bta-miR-132  | -18.4 | 424 |
| bta-miR-132  | -16.9 | 51  |
| bta-miR-132  | -15.6 | 167 |
| bta-miR-132  | -15.5 | 341 |
| bta-miR-132  | -15.2 | 738 |
| bta-miR-132  | -14.6 | 204 |
| bta-miR-132  | -14.3 | 225 |
| bta-miR-132  | -13.9 | 635 |
| bta-miR-132  | -13.2 | 457 |
| bta-miR-132  | -12.5 | 143 |
| bta-miR-132  | -12.0 | 34  |
| bta-miR-132  | -11.9 | 261 |
| bta-miR-132  | -11.4 | 551 |
| bta-miR-132  | -11.2 | 661 |
| bta-miR-132  | -10.7 | 277 |
| bta-miR-132  | -10.3 | 1   |
| bta-miR-132  | -10.1 | 595 |
| bta-miR-132  | -10.0 | 515 |
| bta-miR-138  | -24.5 | 114 |
| bta-miR-138  | -24.5 | 155 |
| bta-miR-138  | -23.3 | 51  |
| bta-miR-138  | -23.1 | 576 |
| bta-miR-138  | -22.7 | 482 |
| bta-miR-138  | -22.0 | 85  |
| bta-miR-138  | -21.4 | 361 |
| bta-miR-138  | -21.3 | 12  |
| bta-miR-138  | -21.0 | 424 |
| bta-miR-138  | -19.1 | 402 |
| bta-miR-138  | -18.6 | 499 |
| bta-miR-138  | -18.5 | 623 |
| bta-miR-138  | -17.2 | 308 |
| bta-miR-138  | -16.6 | 344 |
| bta-miR-138  | -15.8 | 659 |
| bta-miR-138  | -15.7 | 177 |
| bta-miR-138  | -15.4 | 270 |
| bta-miR-138  | -15.2 | 242 |
| bta-miR-138  | -14.7 | 710 |
| bta-miR-138  | -14.4 | 551 |
| bta-miR-138  | -13.3 | 141 |
| bta-miR-138  | -13.2 | 382 |
| bta-miR-138  | -12.7 | 215 |
| bta-miR-138  | -12.2 | 605 |
| bta-miR-138  | -11.9 | 414 |
| bta-miR-138  | -11.7 | 291 |
| bta-miR-138  | -11.5 | 72  |
| bta-miR-138  | -11.0 | 467 |
| bta-miR-138  | -11.0 | 681 |
| bta-miR-138  | -11.0 | 527 |
| bta-miR-148b | -22.6 | 66  |
| bta-miR-148b | -19.7 | 469 |
| bta-miR-148b | -19.6 | 573 |
| bta-miR-148b | -19.5 | 535 |
| bta-miR-148b | -18.5 | 415 |
| bta-miR-148b | -17.1 | 606 |
| bta-miR-148b | -17.0 | 5   |
| bta-miR-148b | -17.0 | 353 |



|               |       |     |
|---------------|-------|-----|
| bta-miR-148b  | -15.6 | 263 |
| bta-miR-148b  | -15.4 | 172 |
| bta-miR-148b  | -14.9 | 517 |
| bta-miR-148b  | -14.6 | 654 |
| bta-miR-148b  | -14.0 | 733 |
| bta-miR-148b  | -13.4 | 384 |
| bta-miR-148b  | -13.2 | 552 |
| bta-miR-148b  | -12.6 | 106 |
| bta-miR-148b  | -11.9 | 36  |
| bta-miR-148b  | -11.8 | 226 |
| bta-miR-148b  | -11.4 | 280 |
| bta-miR-148b  | -11.3 | 206 |
| bta-miR-148b  | -11.0 | 435 |
| bta-miR-148b  | -10.9 | 633 |
| bta-miR-148b  | -10.6 | 59  |
| bta-miR-148b  | -10.3 | 691 |
| bta-miR-17-5p | -23.4 | 367 |
| bta-miR-17-5p | -22.9 | 13  |
| bta-miR-17-5p | -21.9 | 420 |
| bta-miR-17-5p | -20.7 | 579 |
| bta-miR-17-5p | -20.7 | 488 |
| bta-miR-17-5p | -20.6 | 111 |
| bta-miR-17-5p | -20.4 | 649 |
| bta-miR-17-5p | -19.5 | 537 |
| bta-miR-17-5p | -18.3 | 189 |
| bta-miR-17-5p | -18.0 | 51  |
| bta-miR-17-5p | -17.6 | 457 |
| bta-miR-17-5p | -17.4 | 86  |
| bta-miR-17-5p | -16.7 | 560 |
| bta-miR-17-5p | -16.3 | 261 |
| bta-miR-17-5p | -15.9 | 385 |
| bta-miR-17-5p | -14.5 | 618 |
| bta-miR-17-5p | -14.3 | 341 |
| bta-miR-17-5p | -13.4 | 739 |
| bta-miR-17-5p | -13.2 | 138 |
| bta-miR-17-5p | -13.2 | 526 |
| bta-miR-17-5p | -12.8 | 275 |
| bta-miR-17-5p | -12.4 | 307 |
| bta-miR-17-5p | -12.4 | 167 |
| bta-miR-17-5p | -12.4 | 668 |
| bta-miR-17-5p | -11.2 | 210 |
| bta-miR-17-5p | -11.0 | 249 |
| bta-miR-17-5p | -10.7 | 2   |
| bta-miR-17-5p | -10.1 | 705 |
| bta-miR-17-3p | -22.6 | 35  |
| bta-miR-17-3p | -21.8 | 480 |
| bta-miR-17-3p | -21.4 | 573 |
| bta-miR-17-3p | -20.5 | 355 |
| bta-miR-17-3p | -19.3 | 408 |
| bta-miR-17-3p | -18.7 | 517 |
| bta-miR-17-3p | -17.6 | 106 |
| bta-miR-17-3p | -17.1 | 172 |
| bta-miR-17-3p | -17.0 | 631 |
| bta-miR-17-3p | -16.8 | 70  |
| bta-miR-17-3p | -16.7 | 544 |
| bta-miR-17-3p | -16.2 | 425 |
| bta-miR-17-3p | -15.9 | 151 |
| bta-miR-17-3p | -15.9 | 558 |
| bta-miR-17-3p | -15.7 | 257 |

|               |       |     |
|---------------|-------|-----|
| bta-miR-17-3p | -15.5 | 3   |
| bta-miR-17-3p | -15.0 | 654 |
| bta-miR-17-3p | -14.8 | 394 |
| bta-miR-17-3p | -14.3 | 278 |
| bta-miR-17-3p | -14.0 | 596 |
| bta-miR-17-3p | -13.4 | 86  |
| bta-miR-17-3p | -13.2 | 668 |
| bta-miR-17-3p | -12.6 | 240 |
| bta-miR-17-3p | -12.5 | 202 |
| bta-miR-17-3p | -11.9 | 122 |
| bta-miR-17-3p | -11.7 | 531 |
| bta-miR-17-3p | -11.6 | 453 |
| bta-miR-17-3p | -11.1 | 473 |
| bta-miR-17-3p | -11.1 | 506 |
| bta-miR-17-3p | -10.9 | 22  |
| bta-miR-17-3p | -10.7 | 693 |
| bta-miR-17-3p | -10.6 | 739 |
| bta-miR-181c  | -25.2 | 1   |
| bta-miR-181c  | -21.9 | 594 |
| bta-miR-181c  | -19.3 | 71  |
| bta-miR-181c  | -18.6 | 406 |
| bta-miR-181c  | -17.1 | 558 |
| bta-miR-181c  | -17.1 | 734 |
| bta-miR-181c  | -16.1 | 361 |
| bta-miR-181c  | -15.5 | 622 |
| bta-miR-181c  | -15.4 | 255 |
| bta-miR-181c  | -15.3 | 30  |
| bta-miR-181c  | -15.2 | 154 |
| bta-miR-181c  | -15.1 | 425 |
| bta-miR-181c  | -14.9 | 481 |
| bta-miR-181c  | -14.6 | 520 |
| bta-miR-181c  | -14.0 | 129 |
| bta-miR-181c  | -14.0 | 188 |
| bta-miR-181c  | -14.0 | 334 |
| bta-miR-181c  | -13.9 | 648 |
| bta-miR-181c  | -13.4 | 443 |
| bta-miR-181c  | -13.0 | 273 |
| bta-miR-181c  | -12.9 | 211 |
| bta-miR-181c  | -12.9 | 455 |
| bta-miR-181c  | -12.5 | 59  |
| bta-miR-181c  | -12.3 | 114 |
| bta-miR-181c  | -12.3 | 695 |
| bta-miR-181c  | -11.8 | 313 |
| bta-miR-181c  | -10.9 | 352 |
| bta-miR-181c  | -10.8 | 49  |
| bta-miR-181c  | -10.8 | 145 |
| bta-miR-181c  | -10.3 | 229 |
| bta-miR-181c  | -10.1 | 326 |
| bta-miR-181c  | -10.0 | 666 |
| bta-miR-186   | -25.6 | 166 |
| bta-miR-186   | -24.3 | 623 |
| bta-miR-186   | -23.4 | 429 |
| bta-miR-186   | -19.5 | 605 |
| bta-miR-186   | -18.9 | 205 |
| bta-miR-186   | -18.8 | 472 |
| bta-miR-186   | -18.2 | 270 |
| bta-miR-186   | -17.2 | 29  |
| bta-miR-186   | -17.2 | 234 |
| bta-miR-186   | -16.7 | 108 |

|             |       |     |
|-------------|-------|-----|
| bta-miR-186 | -16.7 | 50  |
| bta-miR-186 | -16.2 | 361 |
| bta-miR-186 | -14.3 | 330 |
| bta-miR-186 | -14.3 | 97  |
| bta-miR-186 | -13.9 | 308 |
| bta-miR-186 | -13.9 | 4   |
| bta-miR-186 | -13.6 | 407 |
| bta-miR-186 | -13.2 | 566 |
| bta-miR-186 | -12.5 | 669 |
| bta-miR-186 | -12.3 | 344 |
| bta-miR-186 | -12.3 | 499 |
| bta-miR-186 | -11.7 | 192 |
| bta-miR-186 | -10.9 | 698 |
| bta-miR-186 | -10.6 | 596 |
| bta-miR-186 | -10.1 | 324 |
| bta-miR-186 | -10.0 | 78  |
| bta-miR-191 | -23.8 | 617 |
| bta-miR-191 | -23.1 | 64  |
| bta-miR-191 | -21.8 | 410 |
| bta-miR-191 | -21.6 | 495 |
| bta-miR-191 | -19.4 | 453 |
| bta-miR-191 | -18.5 | 165 |
| bta-miR-191 | -18.1 | 559 |
| bta-miR-191 | -17.9 | 115 |
| bta-miR-191 | -17.8 | 696 |
| bta-miR-191 | -17.2 | 278 |
| bta-miR-191 | -16.9 | 12  |
| bta-miR-191 | -16.5 | 472 |
| bta-miR-191 | -16.3 | 586 |
| bta-miR-191 | -16.2 | 653 |
| bta-miR-191 | -15.1 | 219 |
| bta-miR-191 | -14.7 | 742 |
| bta-miR-191 | -14.6 | 516 |
| bta-miR-191 | -13.6 | 682 |
| bta-miR-191 | -13.3 | 243 |
| bta-miR-191 | -12.7 | 603 |
| bta-miR-191 | -12.3 | 307 |
| bta-miR-191 | -12.3 | 384 |
| bta-miR-191 | -11.4 | 548 |
| bta-miR-191 | -10.8 | 342 |
| bta-miR-191 | -10.3 | 358 |
| bta-miR-191 | -10.3 | 448 |
| bta-miR-191 | -10.1 | 198 |
| bta-miR-191 | -10.0 | 1   |
| bta-miR-192 | -22.4 | 3   |
| bta-miR-192 | -19.5 | 85  |
| bta-miR-192 | -19.0 | 413 |
| bta-miR-192 | -18.3 | 582 |
| bta-miR-192 | -18.1 | 250 |
| bta-miR-192 | -18.0 | 40  |
| bta-miR-192 | -17.7 | 560 |
| bta-miR-192 | -17.5 | 605 |
| bta-miR-192 | -16.7 | 115 |
| bta-miR-192 | -16.0 | 477 |
| bta-miR-192 | -15.3 | 632 |
| bta-miR-192 | -14.9 | 155 |
| bta-miR-192 | -14.7 | 432 |
| bta-miR-192 | -14.6 | 369 |
| bta-miR-192 | -14.1 | 216 |

|              |       |     |
|--------------|-------|-----|
| bta-miR-192  | -14.1 | 740 |
| bta-miR-192  | -13.1 | 72  |
| bta-miR-192  | -12.4 | 524 |
| bta-miR-192  | -12.2 | 497 |
| bta-miR-192  | -11.9 | 292 |
| bta-miR-192  | -11.5 | 185 |
| bta-miR-192  | -11.3 | 455 |
| bta-miR-192  | -11.0 | 623 |
| bta-miR-192  | -10.4 | 667 |
| bta-miR-192  | -10.2 | 548 |
| bta-miR-199b | -22.8 | 1   |
| bta-miR-199b | -22.1 | 393 |
| bta-miR-199b | -21.9 | 600 |
| bta-miR-199b | -20.4 | 65  |
| bta-miR-199b | -20.4 | 445 |
| bta-miR-199b | -18.3 | 92  |
| bta-miR-199b | -16.8 | 494 |
| bta-miR-199b | -16.6 | 198 |
| bta-miR-199b | -16.5 | 242 |
| bta-miR-199b | -16.3 | 352 |
| bta-miR-199b | -16.1 | 650 |
| bta-miR-199b | -15.4 | 170 |
| bta-miR-199b | -15.2 | 734 |
| bta-miR-199b | -14.4 | 420 |
| bta-miR-199b | -14.3 | 372 |
| bta-miR-199b | -14.1 | 559 |
| bta-miR-199b | -12.7 | 622 |
| bta-miR-199b | -11.9 | 577 |
| bta-miR-199b | -11.6 | 221 |
| bta-miR-199b | -11.0 | 149 |
| bta-miR-199b | -11.0 | 516 |
| bta-miR-199b | -10.7 | 281 |
| bta-miR-199b | -10.6 | 28  |
| bta-miR-199b | -10.4 | 128 |
| bta-miR-199b | -10.3 | 482 |
| bta-miR-199b | -10.1 | 661 |
| bta-miR-199b | -10.0 | 692 |
| bta-miR-200a | -22.4 | 352 |
| bta-miR-200a | -20.4 | 1   |
| bta-miR-200a | -19.4 | 592 |
| bta-miR-200a | -18.8 | 383 |
| bta-miR-200a | -18.2 | 472 |
| bta-miR-200a | -17.7 | 227 |
| bta-miR-200a | -17.4 | 635 |
| bta-miR-200a | -17.0 | 22  |
| bta-miR-200a | -16.8 | 126 |
| bta-miR-200a | -16.1 | 500 |
| bta-miR-200a | -15.8 | 65  |
| bta-miR-200a | -15.6 | 255 |
| bta-miR-200a | -14.9 | 535 |
| bta-miR-200a | -14.4 | 565 |
| bta-miR-200a | -13.8 | 85  |
| bta-miR-200a | -13.6 | 188 |
| bta-miR-200a | -13.6 | 415 |
| bta-miR-200a | -13.5 | 738 |
| bta-miR-200a | -13.3 | 613 |
| bta-miR-200a | -12.4 | 454 |
| bta-miR-200a | -12.1 | 149 |
| bta-miR-200a | -11.9 | 206 |

|              |       |     |
|--------------|-------|-----|
| bta-miR-200a | -11.8 | 436 |
| bta-miR-200a | -11.4 | 667 |
| bta-miR-200a | -11.0 | 109 |
| bta-miR-200a | -10.7 | 308 |
| bta-miR-200a | -10.4 | 118 |
| bta-miR-200c | -23.4 | 5   |
| bta-miR-200c | -21.6 | 342 |
| bta-miR-200c | -21.1 | 52  |
| bta-miR-200c | -19.3 | 572 |
| bta-miR-200c | -19.1 | 467 |
| bta-miR-200c | -19.0 | 409 |
| bta-miR-200c | -18.7 | 98  |
| bta-miR-200c | -18.5 | 514 |
| bta-miR-200c | -18.0 | 164 |
| bta-miR-200c | -17.5 | 247 |
| bta-miR-200c | -16.3 | 639 |
| bta-miR-200c | -16.2 | 295 |
| bta-miR-200c | -15.2 | 143 |
| bta-miR-200c | -14.5 | 618 |
| bta-miR-200c | -14.4 | 23  |
| bta-miR-200c | -14.3 | 459 |
| bta-miR-200c | -14.2 | 428 |
| bta-miR-200c | -14.0 | 207 |
| bta-miR-200c | -13.6 | 317 |
| bta-miR-200c | -13.4 | 534 |
| bta-miR-200c | -13.3 | 699 |
| bta-miR-200c | -12.6 | 182 |
| bta-miR-200c | -12.5 | 118 |
| bta-miR-200c | -11.9 | 391 |
| bta-miR-200c | -11.7 | 715 |
| bta-miR-200c | -11.4 | 270 |
| bta-miR-200c | -11.2 | 85  |
| bta-miR-200c | -11.2 | 275 |
| bta-miR-200c | -11.0 | 564 |
| bta-miR-200c | -10.5 | 666 |
| bta-miR-200c | -10.0 | 72  |
| bta-miR-210  | -30.9 | 107 |
| bta-miR-210  | -27.3 | 559 |
| bta-miR-210  | -25.7 | 472 |
| bta-miR-210  | -25.3 | 72  |
| bta-miR-210  | -24.9 | 410 |
| bta-miR-210  | -23.6 | 37  |
| bta-miR-210  | -22.0 | 165 |
| bta-miR-210  | -21.8 | 2   |
| bta-miR-210  | -20.9 | 243 |
| bta-miR-210  | -20.8 | 583 |
| bta-miR-210  | -20.2 | 361 |
| bta-miR-210  | -16.7 | 277 |
| bta-miR-210  | -16.4 | 637 |
| bta-miR-210  | -15.4 | 342 |
| bta-miR-210  | -14.2 | 137 |
| bta-miR-210  | -14.0 | 516 |
| bta-miR-210  | -14.0 | 742 |
| bta-miR-210  | -13.8 | 228 |
| bta-miR-210  | -13.6 | 207 |
| bta-miR-210  | -13.1 | 19  |
| bta-miR-210  | -13.1 | 543 |
| bta-miR-210  | -12.5 | 444 |
| bta-miR-210  | -12.4 | 617 |

|               |       |     |
|---------------|-------|-----|
| bta-miR-210   | -12.1 | 660 |
| bta-miR-210   | -11.8 | 393 |
| bta-miR-210   | -11.5 | 311 |
| bta-miR-210   | -11.4 | 692 |
| bta-miR-210   | -11.0 | 29  |
| bta-miR-214   | -30.6 | 560 |
| bta-miR-214   | -27.7 | 413 |
| bta-miR-214   | -27.6 | 1   |
| bta-miR-214   | -24.8 | 86  |
| bta-miR-214   | -24.0 | 364 |
| bta-miR-214   | -22.4 | 473 |
| bta-miR-214   | -22.1 | 529 |
| bta-miR-214   | -19.9 | 51  |
| bta-miR-214   | -18.2 | 656 |
| bta-miR-214   | -18.0 | 30  |
| bta-miR-214   | -17.5 | 244 |
| bta-miR-214   | -17.0 | 624 |
| bta-miR-214   | -16.5 | 511 |
| bta-miR-214   | -15.4 | 391 |
| bta-miR-214   | -15.2 | 283 |
| bta-miR-214   | -14.7 | 685 |
| bta-miR-214   | -14.6 | 167 |
| bta-miR-214   | -13.5 | 119 |
| bta-miR-214   | -13.2 | 739 |
| bta-miR-214   | -12.9 | 585 |
| bta-miR-214   | -12.2 | 206 |
| bta-miR-214   | -12.1 | 337 |
| bta-miR-214   | -11.8 | 457 |
| bta-miR-214   | -11.1 | 138 |
| bta-miR-214   | -10.7 | 431 |
| bta-miR-214   | -10.3 | 408 |
| bta-miR-22-5p | -24.1 | 556 |
| bta-miR-22-5p | -22.6 | 423 |
| bta-miR-22-5p | -22.2 | 349 |
| bta-miR-22-5p | -21.7 | 203 |
| bta-miR-22-5p | -21.1 | 454 |
| bta-miR-22-5p | -20.6 | 82  |
| bta-miR-22-5p | -20.4 | 114 |
| bta-miR-22-5p | -20.0 | 615 |
| bta-miR-22-5p | -19.7 | 404 |
| bta-miR-22-5p | -19.4 | 152 |
| bta-miR-22-5p | -18.3 | 265 |
| bta-miR-22-5p | -16.7 | 11  |
| bta-miR-22-5p | -16.6 | 231 |
| bta-miR-22-5p | -16.6 | 585 |
| bta-miR-22-5p | -16.4 | 48  |
| bta-miR-22-5p | -15.5 | 375 |
| bta-miR-22-5p | -15.2 | 491 |
| bta-miR-22-5p | -14.5 | 652 |
| bta-miR-22-5p | -14.4 | 734 |
| bta-miR-22-5p | -13.3 | 695 |
| bta-miR-22-5p | -12.5 | 307 |
| bta-miR-22-5p | -11.9 | 2   |
| bta-miR-22-5p | -11.1 | 520 |
| bta-miR-22-5p | -10.9 | 331 |
| bta-miR-22-5p | -10.9 | 249 |
| bta-miR-22-5p | -10.8 | 136 |
| bta-miR-22-5p | -10.8 | 185 |
| bta-miR-22-5p | -10.7 | 195 |

|               |       |     |
|---------------|-------|-----|
| bta-miR-22-5p | -10.3 | 445 |
| bta-miR-22-3p | -21.8 | 463 |
| bta-miR-22-3p | -21.8 | 5   |
| bta-miR-22-3p | -21.2 | 393 |
| bta-miR-22-3p | -20.9 | 59  |
| bta-miR-22-3p | -19.9 | 738 |
| bta-miR-22-3p | -17.4 | 607 |
| bta-miR-22-3p | -17.3 | 264 |
| bta-miR-22-3p | -17.1 | 176 |
| bta-miR-22-3p | -17.0 | 76  |
| bta-miR-22-3p | -16.8 | 100 |
| bta-miR-22-3p | -16.4 | 632 |
| bta-miR-22-3p | -15.8 | 358 |
| bta-miR-22-3p | -14.3 | 516 |
| bta-miR-22-3p | -14.1 | 551 |
| bta-miR-22-3p | -13.8 | 165 |
| bta-miR-22-3p | -13.3 | 209 |
| bta-miR-22-3p | -13.2 | 41  |
| bta-miR-22-3p | -13.2 | 450 |
| bta-miR-22-3p | -12.9 | 575 |
| bta-miR-22-3p | -12.6 | 487 |
| bta-miR-22-3p | -12.4 | 677 |
| bta-miR-22-3p | -11.8 | 23  |
| bta-miR-22-3p | -11.1 | 424 |
| bta-miR-22-3p | -10.7 | 146 |
| bta-miR-22-3p | -10.4 | 294 |
| bta-miR-22-3p | -10.2 | 703 |
| bta-miR-22-3p | -10.1 | 231 |
| bta-miR-23a   | -22.5 | 619 |
| bta-miR-23a   | -21.9 | 505 |
| bta-miR-23a   | -20.7 | 368 |
| bta-miR-23a   | -20.3 | 478 |
| bta-miR-23a   | -19.7 | 422 |
| bta-miR-23a   | -19.2 | 258 |
| bta-miR-23a   | -19.2 | 575 |
| bta-miR-23a   | -18.8 | 3   |
| bta-miR-23a   | -18.5 | 102 |
| bta-miR-23a   | -18.3 | 598 |
| bta-miR-23a   | -17.5 | 82  |
| bta-miR-23a   | -16.9 | 709 |
| bta-miR-23a   | -16.6 | 176 |
| bta-miR-23a   | -16.4 | 400 |
| bta-miR-23a   | -15.5 | 231 |
| bta-miR-23a   | -15.5 | 650 |
| bta-miR-23a   | -15.5 | 454 |
| bta-miR-23a   | -13.9 | 33  |
| bta-miR-23a   | -13.3 | 357 |
| bta-miR-23a   | -13.1 | 280 |
| bta-miR-23a   | -12.5 | 60  |
| bta-miR-23a   | -12.4 | 731 |
| bta-miR-23a   | -12.0 | 328 |
| bta-miR-23a   | -11.9 | 140 |
| bta-miR-23a   | -11.7 | 313 |
| bta-miR-23a   | -11.3 | 202 |
| bta-miR-23a   | -11.2 | 681 |
| bta-miR-23a   | -10.8 | 168 |
| bta-miR-23a   | -10.7 | 133 |
| bta-miR-23a   | -10.6 | 532 |
| bta-miR-23a   | -10.1 | 163 |

|             |       |     |
|-------------|-------|-----|
| bta-miR-29b | -22.7 | 65  |
| bta-miR-29b | -18.9 | 22  |
| bta-miR-29b | -18.8 | 366 |
| bta-miR-29b | -18.0 | 92  |
| bta-miR-29b | -17.8 | 403 |
| bta-miR-29b | -16.7 | 586 |
| bta-miR-29b | -16.5 | 429 |
| bta-miR-29b | -16.4 | 653 |
| bta-miR-29b | -15.6 | 736 |
| bta-miR-29b | -15.4 | 1   |
| bta-miR-29b | -15.0 | 205 |
| bta-miR-29b | -15.0 | 264 |
| bta-miR-29b | -14.2 | 340 |
| bta-miR-29b | -14.1 | 523 |
| bta-miR-29b | -14.0 | 464 |
| bta-miR-29b | -13.8 | 137 |
| bta-miR-29b | -13.2 | 159 |
| bta-miR-29b | -13.0 | 494 |
| bta-miR-29b | -12.3 | 626 |
| bta-miR-29b | -12.2 | 560 |
| bta-miR-29b | -11.1 | 685 |
| bta-miR-29b | -10.9 | 711 |
| bta-miR-29c | -21.2 | 64  |
| bta-miR-29c | -19.0 | 340 |
| bta-miR-29c | -18.7 | 1   |
| bta-miR-29c | -18.6 | 24  |
| bta-miR-29c | -18.4 | 462 |
| bta-miR-29c | -18.3 | 569 |
| bta-miR-29c | -18.1 | 365 |
| bta-miR-29c | -17.9 | 595 |
| bta-miR-29c | -17.3 | 92  |
| bta-miR-29c | -17.1 | 403 |
| bta-miR-29c | -17.0 | 716 |
| bta-miR-29c | -14.9 | 243 |
| bta-miR-29c | -14.8 | 509 |
| bta-miR-29c | -14.7 | 435 |
| bta-miR-29c | -14.1 | 166 |
| bta-miR-29c | -14.0 | 216 |
| bta-miR-29c | -13.8 | 647 |
| bta-miR-29c | -12.3 | 626 |
| bta-miR-29c | -11.4 | 543 |
| bta-miR-29c | -11.2 | 487 |
| bta-miR-29c | -10.9 | 142 |
| bta-miR-29c | -10.8 | 691 |
| bta-miR-29c | -10.5 | 277 |
| bta-miR-29c | -10.1 | 188 |
| bta-miR-361 | -23.8 | 473 |
| bta-miR-361 | -22.0 | 624 |
| bta-miR-361 | -20.7 | 189 |
| bta-miR-361 | -20.1 | 577 |
| bta-miR-361 | -19.9 | 428 |
| bta-miR-361 | -19.5 | 327 |
| bta-miR-361 | -19.4 | 359 |
| bta-miR-361 | -19.1 | 73  |
| bta-miR-361 | -18.7 | 108 |
| bta-miR-361 | -18.5 | 275 |
| bta-miR-361 | -18.0 | 408 |
| bta-miR-361 | -17.9 | 30  |
| bta-miR-361 | -16.3 | 167 |



|                |       |     |
|----------------|-------|-----|
| bta-miR-361    | -16.0 | 220 |
| bta-miR-361    | -15.8 | 258 |
| bta-miR-361    | -14.4 | 244 |
| bta-miR-361    | -14.1 | 649 |
| bta-miR-361    | -14.1 | 320 |
| bta-miR-361    | -13.8 | 492 |
| bta-miR-361    | -13.8 | 560 |
| bta-miR-361    | -13.4 | 379 |
| bta-miR-361    | -13.1 | 307 |
| bta-miR-361    | -13.0 | 594 |
| bta-miR-361    | -12.9 | 134 |
| bta-miR-361    | -12.9 | 702 |
| bta-miR-361    | -12.7 | 2   |
| bta-miR-361    | -12.7 | 606 |
| bta-miR-361    | -11.6 | 400 |
| bta-miR-361    | -11.3 | 537 |
| bta-miR-361    | -11.3 | 740 |
| bta-miR-361    | -11.3 | 459 |
| bta-miR-361    | -10.8 | 510 |
| bta-miR-361    | -10.6 | 682 |
| bta-miR-361    | -10.3 | 248 |
| bta-miR-423-5p | -28.4 | 241 |
| bta-miR-423-5p | -24.3 | 394 |
| bta-miR-423-5p | -22.9 | 16  |
| bta-miR-423-5p | -22.6 | 546 |
| bta-miR-423-5p | -21.7 | 574 |
| bta-miR-423-5p | -20.4 | 308 |
| bta-miR-423-5p | -20.2 | 615 |
| bta-miR-423-5p | -20.1 | 451 |
| bta-miR-423-5p | -19.4 | 280 |
| bta-miR-423-5p | -19.1 | 68  |
| bta-miR-423-5p | -19.0 | 174 |
| bta-miR-423-5p | -18.5 | 663 |
| bta-miR-423-5p | -17.5 | 375 |
| bta-miR-423-5p | -17.4 | 129 |
| bta-miR-423-5p | -17.2 | 343 |
| bta-miR-423-5p | -17.0 | 491 |
| bta-miR-423-5p | -16.7 | 97  |
| bta-miR-423-5p | -15.9 | 519 |
| bta-miR-423-5p | -15.9 | 36  |
| bta-miR-423-5p | -15.6 | 2   |
| bta-miR-423-5p | -15.4 | 156 |
| bta-miR-423-5p | -15.0 | 199 |
| bta-miR-423-5p | -14.4 | 735 |
| bta-miR-423-5p | -13.2 | 328 |
| bta-miR-423-5p | -12.6 | 641 |
| bta-miR-423-5p | -12.5 | 707 |
| bta-miR-423-5p | -11.7 | 59  |
| bta-miR-423-5p | -10.9 | 235 |
| bta-miR-423-5p | -10.1 | 483 |
| bta-miR-423-3p | -32.2 | 415 |
| bta-miR-423-3p | -29.4 | 61  |
| bta-miR-423-3p | -29.2 | 266 |
| bta-miR-423-3p | -27.8 | 619 |
| bta-miR-423-3p | -27.4 | 452 |
| bta-miR-423-3p | -25.8 | 216 |
| bta-miR-423-3p | -24.8 | 174 |
| bta-miR-423-3p | -23.7 | 1   |
| bta-miR-423-3p | -23.5 | 92  |

|                |       |     |
|----------------|-------|-----|
| bta-miR-423-3p | -23.3 | 568 |
| bta-miR-423-3p | -22.4 | 356 |
| bta-miR-423-3p | -20.5 | 591 |
| bta-miR-423-3p | -18.8 | 503 |
| bta-miR-423-3p | -17.9 | 656 |
| bta-miR-423-3p | -17.7 | 387 |
| bta-miR-423-3p | -17.1 | 27  |
| bta-miR-423-3p | -16.8 | 730 |
| bta-miR-423-3p | -16.1 | 308 |
| bta-miR-423-3p | -15.9 | 155 |
| bta-miR-423-3p | -15.3 | 240 |
| bta-miR-423-3p | -15.1 | 119 |
| bta-miR-423-3p | -13.4 | 529 |
| bta-miR-423-3p | -12.6 | 613 |
| bta-miR-423-3p | -11.3 | 337 |
| bta-miR-423-3p | -10.4 | 443 |
| bta-miR-425-5p | -22.7 | 9   |
| bta-miR-425-5p | -20.3 | 67  |
| bta-miR-425-5p | -19.6 | 618 |
| bta-miR-425-5p | -18.6 | 505 |
| bta-miR-425-5p | -18.0 | 447 |
| bta-miR-425-5p | -16.5 | 215 |
| bta-miR-425-5p | -15.2 | 653 |
| bta-miR-425-5p | -14.8 | 352 |
| bta-miR-425-5p | -14.7 | 478 |
| bta-miR-425-5p | -14.2 | 170 |
| bta-miR-425-5p | -14.2 | 263 |
| bta-miR-425-5p | -13.3 | 594 |
| bta-miR-425-5p | -12.9 | 414 |
| bta-miR-425-5p | -12.5 | 605 |
| bta-miR-425-5p | -11.4 | 545 |
| bta-miR-425-5p | -11.0 | 238 |
| bta-miR-425-5p | -10.7 | 107 |
| bta-miR-425-5p | -10.5 | 1   |
| bta-miR-425-5p | -10.4 | 734 |
| bta-miR-425-5p | -10.1 | 198 |
| bta-miR-425-3p | -29.6 | 414 |
| bta-miR-425-3p | -27.2 | 16  |
| bta-miR-425-3p | -24.5 | 614 |
| bta-miR-425-3p | -23.9 | 69  |
| bta-miR-425-3p | -21.8 | 114 |
| bta-miR-425-3p | -21.2 | 370 |
| bta-miR-425-3p | -21.0 | 448 |
| bta-miR-425-3p | -20.4 | 479 |
| bta-miR-425-3p | -19.1 | 350 |
| bta-miR-425-3p | -19.0 | 155 |
| bta-miR-425-3p | -18.6 | 497 |
| bta-miR-425-3p | -17.6 | 269 |
| bta-miR-425-3p | -16.8 | 220 |
| bta-miR-425-3p | -16.5 | 176 |
| bta-miR-425-3p | -15.1 | 586 |
| bta-miR-425-3p | -15.1 | 41  |
| bta-miR-425-3p | -14.9 | 199 |
| bta-miR-425-3p | -14.4 | 631 |
| bta-miR-425-3p | -14.4 | 708 |
| bta-miR-425-3p | -13.7 | 560 |
| bta-miR-425-3p | -13.7 | 294 |
| bta-miR-425-3p | -13.4 | 599 |
| bta-miR-425-3p | -12.1 | 738 |

|                |       |     |
|----------------|-------|-----|
| bta-miR-425-3p | -11.6 | 244 |
| bta-miR-425-3p | -11.4 | 137 |
| bta-miR-425-3p | -11.2 | 319 |
| bta-miR-425-3p | -11.0 | 336 |
| bta-miR-450    | -20.1 | 478 |
| bta-miR-450    | -18.5 | 598 |
| bta-miR-450    | -17.3 | 504 |
| bta-miR-450    | -17.0 | 453 |
| bta-miR-450    | -16.8 | 628 |
| bta-miR-450    | -16.2 | 371 |
| bta-miR-450    | -16.0 | 154 |
| bta-miR-450    | -15.7 | 738 |
| bta-miR-450    | -15.7 | 15  |
| bta-miR-450    | -14.5 | 83  |
| bta-miR-450    | -14.4 | 279 |
| bta-miR-450    | -13.7 | 219 |
| bta-miR-450    | -13.5 | 113 |
| bta-miR-450    | -13.5 | 177 |
| bta-miR-450    | -13.2 | 38  |
| bta-miR-450    | -13.1 | 619 |
| bta-miR-450    | -12.8 | 654 |
| bta-miR-450    | -12.3 | 349 |
| bta-miR-450    | -12.1 | 422 |
| bta-miR-450    | -12.1 | 268 |
| bta-miR-450    | -10.7 | 559 |
| bta-miR-450    | -10.2 | 206 |
| bta-miR-450    | -10.1 | 705 |
| bta-miR-455    | -24.5 | 229 |
| bta-miR-455    | -19.7 | 251 |
| bta-miR-455    | -19.2 | 404 |
| bta-miR-455    | -17.9 | 62  |
| bta-miR-455    | -17.9 | 476 |
| bta-miR-455    | -17.8 | 3   |
| bta-miR-455    | -17.6 | 94  |
| bta-miR-455    | -17.1 | 589 |
| bta-miR-455    | -16.5 | 659 |
| bta-miR-455    | -16.4 | 617 |
| bta-miR-455    | -14.8 | 166 |
| bta-miR-455    | -14.8 | 497 |
| bta-miR-455    | -14.5 | 146 |
| bta-miR-455    | -14.5 | 370 |
| bta-miR-455    | -14.5 | 562 |
| bta-miR-455    | -14.3 | 200 |
| bta-miR-455    | -14.2 | 40  |
| bta-miR-455    | -13.9 | 464 |
| bta-miR-455    | -13.1 | 433 |
| bta-miR-455    | -12.6 | 80  |
| bta-miR-455    | -12.1 | 419 |
| bta-miR-455    | -11.8 | 344 |
| bta-miR-455    | -11.7 | 125 |
| bta-miR-455    | -11.2 | 514 |
| bta-miR-455    | -11.2 | 209 |
| bta-miR-455    | -11.0 | 393 |
| bta-miR-455    | -10.8 | 546 |
| bta-miR-455    | -10.5 | 734 |
| bta-miR-455    | -10.5 | 686 |
| bta-miR-455    | -10.4 | 525 |
| bta-miR-455    | -10.2 | 317 |
| bta-miR-455*   | -28.3 | 80  |

|              |       |     |
|--------------|-------|-----|
| bta-miR-455* | -24.5 | 359 |
| bta-miR-455* | -23.4 | 17  |
| bta-miR-455* | -22.9 | 411 |
| bta-miR-455* | -22.7 | 617 |
| bta-miR-455* | -22.1 | 544 |
| bta-miR-455* | -20.6 | 251 |
| bta-miR-455* | -19.9 | 167 |
| bta-miR-455* | -19.7 | 584 |
| bta-miR-455* | -18.8 | 473 |
| bta-miR-455* | -17.0 | 659 |
| bta-miR-455* | -16.2 | 235 |
| bta-miR-455* | -16.0 | 525 |
| bta-miR-455* | -15.8 | 304 |
| bta-miR-455* | -14.7 | 51  |
| bta-miR-455* | -14.7 | 697 |
| bta-miR-455* | -14.1 | 126 |
| bta-miR-455* | -13.8 | 729 |
| bta-miR-455* | -13.5 | 3   |
| bta-miR-455* | -13.4 | 496 |
| bta-miR-455* | -13.3 | 566 |
| bta-miR-455* | -13.1 | 66  |
| bta-miR-455* | -12.7 | 142 |
| bta-miR-455* | -12.6 | 336 |
| bta-miR-455* | -12.4 | 276 |
| bta-miR-455* | -11.8 | 199 |
| bta-miR-455* | -11.0 | 215 |
| bta-miR-455* | -11.0 | 742 |
| bta-miR-455* | -10.9 | 430 |
| bta-miR-455* | -10.5 | 330 |
| bta-miR-455* | -10.2 | 135 |
| bta-miR-455* | -10.2 | 324 |
| bta-miR-93   | -23.1 | 490 |
| bta-miR-93   | -21.9 | 367 |
| bta-miR-93   | -20.2 | 581 |
| bta-miR-93   | -19.1 | 408 |
| bta-miR-93   | -18.8 | 91  |
| bta-miR-93   | -17.6 | 13  |
| bta-miR-93   | -17.5 | 60  |
| bta-miR-93   | -17.5 | 473 |
| bta-miR-93   | -17.0 | 167 |
| bta-miR-93   | -16.3 | 192 |
| bta-miR-93   | -16.3 | 307 |
| bta-miR-93   | -15.9 | 115 |
| bta-miR-93   | -15.7 | 642 |
| bta-miR-93   | -14.8 | 615 |
| bta-miR-93   | -14.5 | 261 |
| bta-miR-93   | -14.4 | 341 |
| bta-miR-93   | -14.3 | 30  |
| bta-miR-93   | -14.2 | 550 |
| bta-miR-93   | -14.0 | 448 |
| bta-miR-93   | -13.3 | 385 |
| bta-miR-93   | -13.0 | 215 |
| bta-miR-93   | -12.9 | 431 |
| bta-miR-93   | -11.9 | 684 |
| bta-miR-93   | -11.7 | 729 |
| bta-miR-93   | -11.1 | 235 |
| bta-miR-93   | -10.3 | 138 |
| bta-miR-93   | -10.0 | 630 |
| bta-let-7g   | -20.1 | 115 |

|               |       |     |
|---------------|-------|-----|
| bta-let-7g    | -19.8 | 582 |
| bta-let-7g    | -18.3 | 267 |
| bta-let-7g    | -17.9 | 375 |
| bta-let-7g    | -17.8 | 553 |
| bta-let-7g    | -17.2 | 184 |
| bta-let-7g    | -17.2 | 413 |
| bta-let-7g    | -16.8 | 61  |
| bta-let-7g    | -16.8 | 292 |
| bta-let-7g    | -15.7 | 685 |
| bta-let-7g    | -15.6 | 6   |
| bta-let-7g    | -15.5 | 618 |
| bta-let-7g    | -15.4 | 730 |
| bta-let-7g    | -15.1 | 453 |
| bta-let-7g    | -15.1 | 235 |
| bta-let-7g    | -15.1 | 518 |
| bta-let-7g    | -14.7 | 96  |
| bta-let-7g    | -14.6 | 477 |
| bta-let-7g    | -14.4 | 149 |
| bta-let-7g    | -14.4 | 359 |
| bta-let-7g    | -14.3 | 648 |
| bta-let-7g    | -13.5 | 251 |
| bta-let-7g    | -13.4 | 43  |
| bta-let-7g    | -11.7 | 497 |
| bta-let-7g    | -10.8 | 602 |
| bta-let-7g    | -10.2 | 403 |
| bta-let-7g    | -10.0 | 332 |
| bta-miR-10b   | -20.9 | 586 |
| bta-miR-10b   | -20.6 | 35  |
| bta-miR-10b   | -19.0 | 614 |
| bta-miR-10b   | -18.7 | 457 |
| bta-miR-10b   | -17.6 | 488 |
| bta-miR-10b   | -17.6 | 373 |
| bta-miR-10b   | -17.3 | 654 |
| bta-miR-10b   | -16.5 | 5   |
| bta-miR-10b   | -14.9 | 72  |
| bta-miR-10b   | -14.3 | 199 |
| bta-miR-10b   | -14.3 | 733 |
| bta-miR-10b   | -13.8 | 267 |
| bta-miR-10b   | -13.2 | 148 |
| bta-miR-10b   | -12.7 | 702 |
| bta-miR-10b   | -12.7 | 415 |
| bta-miR-10b   | -11.9 | 106 |
| bta-miR-10b   | -11.7 | 556 |
| bta-miR-10b   | -10.3 | 689 |
| bta-miR-24-3p | -33.0 | 403 |
| bta-miR-24-3p | -25.0 | 6   |
| bta-miR-24-3p | -24.4 | 87  |
| bta-miR-24-3p | -23.2 | 465 |
| bta-miR-24-3p | -21.6 | 550 |
| bta-miR-24-3p | -20.9 | 577 |
| bta-miR-24-3p | -20.8 | 359 |
| bta-miR-24-3p | -20.0 | 209 |
| bta-miR-24-3p | -19.9 | 427 |
| bta-miR-24-3p | -19.7 | 257 |
| bta-miR-24-3p | -19.3 | 169 |
| bta-miR-24-3p | -19.0 | 33  |
| bta-miR-24-3p | -18.9 | 59  |
| bta-miR-24-3p | -16.8 | 231 |
| bta-miR-24-3p | -16.7 | 641 |

|                |       |     |
|----------------|-------|-----|
| bta-miR-24-3p  | -16.7 | 502 |
| bta-miR-24-3p  | -15.9 | 714 |
| bta-miR-24-3p  | -15.2 | 191 |
| bta-miR-24-3p  | -14.6 | 657 |
| bta-miR-24-3p  | -14.6 | 293 |
| bta-miR-24-3p  | -14.5 | 686 |
| bta-miR-24-3p  | -14.4 | 524 |
| bta-miR-24-3p  | -14.3 | 387 |
| bta-miR-24-3p  | -14.0 | 606 |
| bta-miR-24-3p  | -13.8 | 331 |
| bta-miR-24-3p  | -12.7 | 626 |
| bta-miR-24-3p  | -12.1 | 146 |
| bta-miR-24-3p  | -10.3 | 249 |
| bta-miR-30a-5p | -24.2 | 456 |
| bta-miR-30a-5p | -23.3 | 166 |
| bta-miR-30a-5p | -21.6 | 72  |
| bta-miR-30a-5p | -21.3 | 512 |
| bta-miR-30a-5p | -21.1 | 586 |
| bta-miR-30a-5p | -20.7 | 205 |
| bta-miR-30a-5p | -20.4 | 419 |
| bta-miR-30a-5p | -19.2 | 4   |
| bta-miR-30a-5p | -18.2 | 282 |
| bta-miR-30a-5p | -16.5 | 236 |
| bta-miR-30a-5p | -16.2 | 342 |
| bta-miR-30a-5p | -16.2 | 29  |
| bta-miR-30a-5p | -15.6 | 390 |
| bta-miR-30a-5p | -15.1 | 539 |
| bta-miR-30a-5p | -15.0 | 559 |
| bta-miR-30a-5p | -14.5 | 263 |
| bta-miR-30a-5p | -14.3 | 653 |
| bta-miR-30a-5p | -14.1 | 115 |
| bta-miR-30a-5p | -13.5 | 626 |
| bta-miR-30a-5p | -13.1 | 363 |
| bta-miR-30a-5p | -12.8 | 403 |
| bta-miR-30a-5p | -12.5 | 98  |
| bta-miR-30a-5p | -12.2 | 444 |
| bta-miR-30a-5p | -11.6 | 499 |
| bta-miR-30a-5p | -11.6 | 698 |
| bta-miR-30a-5p | -11.3 | 58  |
| bta-miR-30a-5p | -11.3 | 184 |
| bta-miR-30a-5p | -11.3 | 637 |
| bta-miR-30a-5p | -10.9 | 740 |
| bta-miR-30a-5p | -10.6 | 223 |
| bta-miR-30a-5p | -10.4 | 316 |
| bta-miR-200b   | -19.4 | 4   |
| bta-miR-200b   | -18.9 | 597 |
| bta-miR-200b   | -17.8 | 53  |
| bta-miR-200b   | -17.4 | 410 |
| bta-miR-200b   | -17.1 | 367 |
| bta-miR-200b   | -17.0 | 565 |
| bta-miR-200b   | -16.7 | 501 |
| bta-miR-200b   | -15.5 | 476 |
| bta-miR-200b   | -15.1 | 618 |
| bta-miR-200b   | -14.8 | 263 |
| bta-miR-200b   | -14.4 | 144 |
| bta-miR-200b   | -14.3 | 645 |
| bta-miR-200b   | -14.0 | 109 |
| bta-miR-200b   | -13.2 | 23  |
| bta-miR-200b   | -12.8 | 82  |

|              |       |     |
|--------------|-------|-----|
| bta-miR-200b | -12.5 | 428 |
| bta-miR-200b | -12.4 | 126 |
| bta-miR-200b | -12.3 | 297 |
| bta-miR-200b | -11.8 | 172 |
| bta-miR-200b | -11.8 | 275 |
| bta-miR-200b | -11.5 | 667 |
| bta-miR-200b | -11.4 | 534 |
| bta-miR-200b | -11.3 | 384 |
| bta-miR-200b | -11.2 | 191 |
| bta-miR-200b | -10.8 | 207 |
| bta-miR-200b | -10.7 | 459 |
| bta-miR-200b | -10.7 | 741 |
| bta-miR-200b | -10.4 | 118 |
| bta-miR-200b | -10.0 | 237 |
| bta-miR-200b | -10.0 | 354 |
| bta-miR-7    | -22.1 | 372 |
| bta-miR-7    | -21.5 | 487 |
| bta-miR-7    | -19.5 | 270 |
| bta-miR-7    | -17.7 | 198 |
| bta-miR-7    | -17.6 | 171 |
| bta-miR-7    | -17.4 | 729 |
| bta-miR-7    | -16.8 | 647 |
| bta-miR-7    | -16.6 | 407 |
| bta-miR-7    | -16.2 | 105 |
| bta-miR-7    | -15.6 | 64  |
| bta-miR-7    | -15.1 | 623 |
| bta-miR-7    | -14.9 | 447 |
| bta-miR-7    | -14.3 | 560 |
| bta-miR-7    | -13.8 | 218 |
| bta-miR-7    | -13.6 | 301 |
| bta-miR-7    | -13.4 | 700 |
| bta-miR-7    | -13.2 | 26  |
| bta-miR-7    | -12.9 | 576 |
| bta-miR-7    | -12.4 | 605 |
| bta-miR-7    | -12.0 | 54  |
| bta-miR-7    | -11.6 | 122 |
| bta-miR-7    | -11.6 | 240 |
| bta-miR-7    | -11.2 | 352 |
| bta-miR-7    | -11.0 | 1   |
| bta-miR-7    | -10.4 | 684 |
| bta-let-7a   | -24.3 | 85  |
| bta-let-7a   | -20.0 | 414 |
| bta-let-7a   | -18.1 | 375 |
| bta-let-7a   | -17.6 | 296 |
| bta-let-7a   | -17.6 | 456 |
| bta-let-7a   | -17.0 | 244 |
| bta-let-7a   | -16.7 | 183 |
| bta-let-7a   | -15.7 | 16  |
| bta-let-7a   | -15.6 | 582 |
| bta-let-7a   | -15.6 | 507 |
| bta-let-7a   | -15.5 | 359 |
| bta-let-7a   | -15.3 | 697 |
| bta-let-7a   | -15.1 | 155 |
| bta-let-7a   | -15.1 | 266 |
| bta-let-7a   | -14.7 | 122 |
| bta-let-7a   | -14.6 | 553 |
| bta-let-7a   | -14.6 | 648 |
| bta-let-7a   | -14.0 | 526 |
| bta-let-7a   | -13.9 | 50  |

|              |       |     |
|--------------|-------|-----|
| bta-let-7a   | -13.8 | 623 |
| bta-let-7a   | -13.7 | 733 |
| bta-let-7a   | -13.6 | 399 |
| bta-let-7a   | -13.4 | 199 |
| bta-let-7a   | -11.9 | 61  |
| bta-let-7a   | -11.8 | 480 |
| bta-let-7a   | -10.3 | 332 |
| bta-miR-150  | -27.1 | 593 |
| bta-miR-150  | -24.8 | 56  |
| bta-miR-150  | -23.2 | 415 |
| bta-miR-150  | -22.2 | 488 |
| bta-miR-150  | -18.3 | 367 |
| bta-miR-150  | -18.1 | 444 |
| bta-miR-150  | -17.7 | 264 |
| bta-miR-150  | -17.7 | 160 |
| bta-miR-150  | -17.3 | 13  |
| bta-miR-150  | -16.8 | 464 |
| bta-miR-150  | -15.9 | 199 |
| bta-miR-150  | -14.6 | 109 |
| bta-miR-150  | -13.9 | 739 |
| bta-miR-150  | -13.5 | 654 |
| bta-miR-150  | -13.2 | 624 |
| bta-miR-150  | -12.5 | 560 |
| bta-miR-150  | -11.2 | 232 |
| bta-miR-150  | -10.8 | 148 |
| bta-miR-150  | -10.7 | 346 |
| bta-miR-150  | -10.2 | 353 |
| bta-miR-342  | -25.7 | 610 |
| bta-miR-342  | -25.2 | 11  |
| bta-miR-342  | -21.2 | 418 |
| bta-miR-342  | -20.4 | 499 |
| bta-miR-342  | -19.1 | 69  |
| bta-miR-342  | -19.0 | 228 |
| bta-miR-342  | -17.7 | 444 |
| bta-miR-342  | -16.8 | 366 |
| bta-miR-342  | -16.0 | 659 |
| bta-miR-342  | -15.7 | 201 |
| bta-miR-342  | -15.3 | 37  |
| bta-miR-342  | -15.0 | 575 |
| bta-miR-342  | -14.4 | 113 |
| bta-miR-342  | -13.4 | 737 |
| bta-miR-342  | -12.7 | 280 |
| bta-miR-342  | -12.6 | 351 |
| bta-miR-342  | -12.5 | 172 |
| bta-miR-342  | -12.3 | 1   |
| bta-miR-342  | -12.1 | 562 |
| bta-miR-342  | -11.0 | 709 |
| bta-miR-342  | -10.6 | 86  |
| bta-miR-487b | -23.1 | 616 |
| bta-miR-487b | -22.4 | 357 |
| bta-miR-487b | -22.3 | 411 |
| bta-miR-487b | -21.4 | 11  |
| bta-miR-487b | -21.4 | 79  |
| bta-miR-487b | -20.4 | 496 |
| bta-miR-487b | -20.4 | 576 |
| bta-miR-487b | -16.8 | 252 |
| bta-miR-487b | -16.6 | 109 |
| bta-miR-487b | -16.5 | 174 |
| bta-miR-487b | -16.2 | 446 |



|              |       |     |
|--------------|-------|-----|
| bta-miR-487b | -15.4 | 478 |
| bta-miR-487b | -15.0 | 36  |
| bta-miR-487b | -14.8 | 709 |
| bta-miR-487b | -14.6 | 227 |
| bta-miR-487b | -14.2 | 661 |
| bta-miR-487b | -12.6 | 566 |
| bta-miR-487b | -12.5 | 69  |
| bta-miR-487b | -12.3 | 155 |
| bta-miR-487b | -11.9 | 327 |
| bta-miR-487b | -11.7 | 544 |
| bta-miR-487b | -11.6 | 634 |
| bta-miR-487b | -11.4 | 167 |
| bta-miR-487b | -11.4 | 401 |
| bta-miR-487b | -11.1 | 130 |
| bta-miR-487b | -10.8 | 1   |
| bta-miR-487b | -10.8 | 306 |
| bta-miR-487b | -10.6 | 280 |
| bta-miR-487b | -10.5 | 28  |
| bta-miR-487b | -10.4 | 592 |
| bta-miR-487b | -10.4 | 204 |
| bta-miR-487b | -10.4 | 738 |
| bta-miR-487b | -10.2 | 320 |
| bta-miR-532  | -22.0 | 463 |
| bta-miR-532  | -21.4 | 576 |
| bta-miR-532  | -20.7 | 255 |
| bta-miR-532  | -20.5 | 617 |
| bta-miR-532  | -19.8 | 86  |
| bta-miR-532  | -19.1 | 140 |
| bta-miR-532  | -18.6 | 4   |
| bta-miR-532  | -18.5 | 422 |
| bta-miR-532  | -18.1 | 389 |
| bta-miR-532  | -17.7 | 40  |
| bta-miR-532  | -16.6 | 275 |
| bta-miR-532  | -16.2 | 191 |
| bta-miR-532  | -15.0 | 662 |
| bta-miR-532  | -14.9 | 164 |
| bta-miR-532  | -14.9 | 498 |
| bta-miR-532  | -14.3 | 368 |
| bta-miR-532  | -13.8 | 709 |
| bta-miR-532  | -13.8 | 209 |
| bta-miR-532  | -13.6 | 341 |
| bta-miR-532  | -13.5 | 638 |
| bta-miR-532  | -13.2 | 533 |
| bta-miR-532  | -13.1 | 117 |
| bta-miR-532  | -12.8 | 230 |
| bta-miR-532  | -12.2 | 307 |
| bta-miR-532  | -11.7 | 741 |
| bta-miR-532  | -11.7 | 484 |
| bta-miR-532  | -11.1 | 694 |
| bta-miR-532  | -10.9 | 454 |
| bta-miR-532  | -10.8 | 563 |
| bta-miR-532  | -10.1 | 22  |
| bta-miR-122  | -20.8 | 114 |
| bta-miR-122  | -20.3 | 159 |
| bta-miR-122  | -19.1 | 558 |
| bta-miR-122  | -19.0 | 28  |
| bta-miR-122  | -18.9 | 242 |
| bta-miR-122  | -18.6 | 371 |
| bta-miR-122  | -18.4 | 69  |

|             |       |     |
|-------------|-------|-----|
| bta-miR-122 | -17.3 | 651 |
| bta-miR-122 | -16.9 | 485 |
| bta-miR-122 | -16.6 | 1   |
| bta-miR-122 | -16.4 | 332 |
| bta-miR-122 | -16.0 | 137 |
| bta-miR-122 | -16.0 | 297 |
| bta-miR-122 | -15.9 | 455 |
| bta-miR-122 | -15.9 | 592 |
| bta-miR-122 | -14.3 | 410 |
| bta-miR-122 | -14.2 | 620 |
| bta-miR-122 | -13.9 | 204 |
| bta-miR-122 | -13.9 | 272 |
| bta-miR-122 | -13.7 | 520 |
| bta-miR-122 | -12.8 | 734 |
| bta-miR-122 | -11.9 | 395 |
| bta-miR-122 | -11.7 | 702 |
| bta-miR-122 | -11.6 | 682 |
| bta-miR-122 | -11.0 | 92  |
| bta-miR-122 | -10.3 | 232 |
| bta-miR-122 | -10.0 | 536 |
| bta-miR-30c | -21.7 | 614 |
| bta-miR-30c | -21.4 | 436 |
| bta-miR-30c | -19.8 | 13  |
| bta-miR-30c | -18.7 | 66  |
| bta-miR-30c | -17.9 | 504 |
| bta-miR-30c | -17.2 | 346 |
| bta-miR-30c | -16.9 | 199 |
| bta-miR-30c | -16.7 | 403 |
| bta-miR-30c | -16.2 | 477 |
| bta-miR-30c | -15.9 | 586 |
| bta-miR-30c | -15.3 | 267 |
| bta-miR-30c | -14.5 | 537 |
| bta-miR-30c | -14.0 | 240 |
| bta-miR-30c | -13.7 | 650 |
| bta-miR-30c | -12.0 | 223 |
| bta-miR-30c | -11.9 | 172 |
| bta-miR-30c | -11.8 | 92  |
| bta-miR-30c | -11.0 | 38  |
| bta-miR-30c | -10.8 | 185 |
| bta-miR-30c | -10.0 | 453 |
| bta-let-7i  | -22.1 | 105 |
| bta-let-7i  | -20.6 | 264 |
| bta-let-7i  | -19.7 | 170 |
| bta-let-7i  | -19.4 | 125 |
| bta-let-7i  | -18.7 | 12  |
| bta-let-7i  | -18.5 | 407 |
| bta-let-7i  | -18.4 | 447 |
| bta-let-7i  | -18.3 | 372 |
| bta-let-7i  | -17.9 | 653 |
| bta-let-7i  | -17.9 | 479 |
| bta-let-7i  | -17.8 | 198 |
| bta-let-7i  | -17.5 | 64  |
| bta-let-7i  | -17.3 | 516 |
| bta-let-7i  | -16.9 | 297 |
| bta-let-7i  | -16.7 | 234 |
| bta-let-7i  | -16.1 | 614 |
| bta-let-7i  | -16.0 | 148 |
| bta-let-7i  | -15.5 | 348 |
| bta-let-7i  | -15.5 | 555 |

|                |       |     |
|----------------|-------|-----|
| bta-let-7i     | -15.3 | 737 |
| bta-let-7i     | -15.1 | 575 |
| bta-let-7i     | -13.7 | 37  |
| bta-let-7i     | -13.5 | 495 |
| bta-let-7i     | -13.4 | 687 |
| bta-let-7i     | -12.3 | 597 |
| bta-let-7i     | -11.1 | 435 |
| bta-let-7i     | -10.0 | 332 |
| bta-miR-23b-5p | -25.7 | 16  |
| bta-miR-23b-5p | -24.7 | 410 |
| bta-miR-23b-5p | -23.4 | 263 |
| bta-miR-23b-5p | -22.8 | 487 |
| bta-miR-23b-5p | -22.4 | 234 |
| bta-miR-23b-5p | -21.7 | 113 |
| bta-miR-23b-5p | -21.5 | 64  |
| bta-miR-23b-5p | -21.5 | 653 |
| bta-miR-23b-5p | -21.0 | 605 |
| bta-miR-23b-5p | -20.9 | 298 |
| bta-miR-23b-5p | -20.6 | 463 |
| bta-miR-23b-5p | -20.5 | 165 |
| bta-miR-23b-5p | -20.0 | 559 |
| bta-miR-23b-5p | -19.1 | 583 |
| bta-miR-23b-5p | -18.5 | 354 |
| bta-miR-23b-5p | -18.1 | 37  |
| bta-miR-23b-5p | -16.6 | 439 |
| bta-miR-23b-5p | -16.5 | 205 |
| bta-miR-23b-5p | -16.3 | 1   |
| bta-miR-23b-5p | -15.4 | 375 |
| bta-miR-23b-5p | -14.9 | 692 |
| bta-miR-23b-5p | -14.2 | 89  |
| bta-miR-23b-5p | -14.2 | 128 |
| bta-miR-23b-5p | -13.4 | 740 |
| bta-miR-23b-5p | -12.8 | 182 |
| bta-miR-23b-5p | -11.7 | 147 |
| bta-miR-23b-5p | -11.6 | 516 |
| bta-miR-23b-5p | -11.1 | 325 |
| bta-miR-23b-5p | -10.8 | 544 |
| bta-miR-23b-5p | -10.4 | 629 |
| bta-miR-23b-5p | -10.4 | 332 |
| bta-miR-23b-3p | -21.8 | 359 |
| bta-miR-23b-3p | -21.5 | 618 |
| bta-miR-23b-3p | -20.3 | 422 |
| bta-miR-23b-3p | -19.6 | 576 |
| bta-miR-23b-3p | -19.3 | 464 |
| bta-miR-23b-3p | -19.3 | 3   |
| bta-miR-23b-3p | -19.2 | 252 |
| bta-miR-23b-3p | -19.0 | 81  |
| bta-miR-23b-3p | -19.0 | 505 |
| bta-miR-23b-3p | -16.9 | 110 |
| bta-miR-23b-3p | -16.4 | 400 |
| bta-miR-23b-3p | -16.2 | 644 |
| bta-miR-23b-3p | -15.9 | 598 |
| bta-miR-23b-3p | -15.7 | 40  |
| bta-miR-23b-3p | -15.5 | 155 |
| bta-miR-23b-3p | -15.2 | 231 |
| bta-miR-23b-3p | -13.8 | 709 |
| bta-miR-23b-3p | -13.4 | 687 |
| bta-miR-23b-3p | -13.3 | 191 |
| bta-miR-23b-3p | -12.1 | 740 |

|                |       |     |
|----------------|-------|-----|
| bta-miR-23b-3p | -12.0 | 328 |
| bta-miR-23b-3p | -12.0 | 555 |
| bta-miR-23b-3p | -11.8 | 527 |
| bta-miR-23b-3p | -11.1 | 215 |
| bta-miR-23b-3p | -11.1 | 314 |
| bta-miR-23b-3p | -10.7 | 133 |
| bta-miR-23b-3p | -10.7 | 140 |
| bta-miR-23b-3p | -10.4 | 247 |
| bta-miR-25     | -28.0 | 364 |
| bta-miR-25     | -27.8 | 9   |
| bta-miR-25     | -24.6 | 481 |
| bta-miR-25     | -22.3 | 603 |
| bta-miR-25     | -21.7 | 567 |
| bta-miR-25     | -20.1 | 350 |
| bta-miR-25     | -19.4 | 499 |
| bta-miR-25     | -18.4 | 423 |
| bta-miR-25     | -18.3 | 71  |
| bta-miR-25     | -18.2 | 200 |
| bta-miR-25     | -17.8 | 114 |
| bta-miR-25     | -17.0 | 263 |
| bta-miR-25     | -16.8 | 165 |
| bta-miR-25     | -14.7 | 398 |
| bta-miR-25     | -14.4 | 595 |
| bta-miR-25     | -14.3 | 29  |
| bta-miR-25     | -14.3 | 737 |
| bta-miR-25     | -13.9 | 234 |
| bta-miR-25     | -13.6 | 649 |
| bta-miR-25     | -12.8 | 414 |
| bta-miR-25     | -11.6 | 623 |
| bta-miR-25     | -11.5 | 51  |
| bta-miR-25     | -11.0 | 544 |
| bta-miR-25     | -10.7 | 182 |
| bta-miR-25     | -10.5 | 154 |
| bta-miR-25     | -10.2 | 454 |
| bta-miR-25     | -10.1 | 100 |
| bta-miR-34c    | -25.7 | 107 |
| bta-miR-34c    | -23.5 | 410 |
| bta-miR-34c    | -22.1 | 8   |
| bta-miR-34c    | -21.0 | 639 |
| bta-miR-34c    | -20.7 | 182 |
| bta-miR-34c    | -20.4 | 150 |
| bta-miR-34c    | -20.2 | 544 |
| bta-miR-34c    | -19.3 | 67  |
| bta-miR-34c    | -18.1 | 351 |
| bta-miR-34c    | -17.5 | 452 |
| bta-miR-34c    | -17.5 | 277 |
| bta-miR-34c    | -16.7 | 692 |
| bta-miR-34c    | -16.6 | 500 |
| bta-miR-34c    | -16.4 | 576 |
| bta-miR-34c    | -15.7 | 125 |
| bta-miR-34c    | -15.2 | 37  |
| bta-miR-34c    | -14.9 | 376 |
| bta-miR-34c    | -13.9 | 476 |
| bta-miR-34c    | -12.8 | 663 |
| bta-miR-34c    | -12.8 | 263 |
| bta-miR-34c    | -12.7 | 738 |
| bta-miR-34c    | -12.5 | 623 |
| bta-miR-34c    | -12.4 | 238 |
| bta-miR-34c    | -11.6 | 524 |

|             |       |     |
|-------------|-------|-----|
| bta-miR-34c | -10.9 | 54  |
| bta-miR-34c | -10.9 | 170 |
| bta-miR-34c | -10.4 | 432 |
| bta-miR-34c | -10.4 | 311 |
| bta-miR-363 | -25.2 | 586 |
| bta-miR-363 | -22.4 | 494 |
| bta-miR-363 | -20.7 | 614 |
| bta-miR-363 | -20.3 | 8   |
| bta-miR-363 | -19.5 | 361 |
| bta-miR-363 | -19.5 | 473 |
| bta-miR-363 | -19.4 | 412 |
| bta-miR-363 | -19.1 | 66  |
| bta-miR-363 | -17.7 | 228 |
| bta-miR-363 | -17.3 | 654 |
| bta-miR-363 | -17.2 | 449 |
| bta-miR-363 | -15.8 | 100 |
| bta-miR-363 | -15.1 | 199 |
| bta-miR-363 | -14.4 | 532 |
| bta-miR-363 | -13.9 | 172 |
| bta-miR-363 | -13.7 | 737 |
| bta-miR-363 | -13.3 | 338 |
| bta-miR-363 | -13.1 | 264 |
| bta-miR-363 | -13.0 | 698 |
| bta-miR-363 | -12.6 | 555 |
| bta-miR-363 | -12.1 | 38  |
| bta-miR-363 | -11.8 | 238 |
| bta-miR-363 | -11.3 | 523 |
| bta-miR-363 | -10.1 | 155 |
| bta-let-7a* | -18.5 | 610 |
| bta-let-7a* | -18.2 | 405 |
| bta-let-7a* | -16.9 | 479 |
| bta-let-7a* | -15.7 | 516 |
| bta-let-7a* | -15.2 | 348 |
| bta-let-7a* | -14.7 | 225 |
| bta-let-7a* | -14.5 | 735 |
| bta-let-7a* | -14.1 | 653 |
| bta-let-7a* | -13.9 | 69  |
| bta-let-7a* | -13.9 | 441 |
| bta-let-7a* | -12.4 | 8   |
| bta-let-7a* | -12.2 | 196 |
| bta-let-7a* | -10.6 | 102 |
| bta-let-7a* | -10.5 | 570 |
| bta-let-7a* | -10.4 | 539 |
| bta-let-7a* | -10.2 | 1   |
| bta-let-7b  | -24.8 | 99  |
| bta-let-7b  | -23.8 | 414 |
| bta-let-7b  | -21.8 | 125 |
| bta-let-7b  | -19.8 | 503 |
| bta-let-7b  | -19.6 | 147 |
| bta-let-7b  | -19.6 | 237 |
| bta-let-7b  | -19.6 | 377 |
| bta-let-7b  | -19.1 | 300 |
| bta-let-7b  | -18.9 | 166 |
| bta-let-7b  | -18.0 | 50  |
| bta-let-7b  | -17.9 | 468 |
| bta-let-7b  | -17.9 | 570 |
| bta-let-7b  | -17.4 | 340 |
| bta-let-7b  | -15.5 | 197 |
| bta-let-7b  | -15.5 | 696 |

|            |       |     |
|------------|-------|-----|
| bta-let-7b | -15.2 | 648 |
| bta-let-7b | -14.8 | 29  |
| bta-let-7b | -14.3 | 560 |
| bta-let-7b | -14.2 | 739 |
| bta-let-7b | -13.8 | 623 |
| bta-let-7b | -13.8 | 267 |
| bta-let-7b | -13.7 | 318 |
| bta-let-7b | -13.6 | 399 |
| bta-let-7b | -12.4 | 595 |
| bta-let-7b | -11.9 | 13  |
| bta-let-7b | -11.7 | 525 |
| bta-let-7b | -11.5 | 457 |
| bta-let-7b | -10.4 | 485 |
| bta-let-7c | -24.8 | 99  |
| bta-let-7c | -20.9 | 407 |
| bta-let-7c | -19.7 | 125 |
| bta-let-7c | -19.1 | 237 |
| bta-let-7c | -18.5 | 563 |
| bta-let-7c | -18.3 | 482 |
| bta-let-7c | -18.0 | 166 |
| bta-let-7c | -17.9 | 298 |
| bta-let-7c | -17.7 | 340 |
| bta-let-7c | -17.3 | 456 |
| bta-let-7c | -17.2 | 50  |
| bta-let-7c | -16.8 | 375 |
| bta-let-7c | -15.6 | 507 |
| bta-let-7c | -15.4 | 12  |
| bta-let-7c | -15.3 | 697 |
| bta-let-7c | -15.1 | 266 |
| bta-let-7c | -14.3 | 648 |
| bta-let-7c | -14.2 | 150 |
| bta-let-7c | -13.9 | 584 |
| bta-let-7c | -13.8 | 623 |
| bta-let-7c | -13.7 | 733 |
| bta-let-7c | -13.6 | 198 |
| bta-let-7c | -12.9 | 527 |
| bta-let-7c | -10.4 | 318 |
| bta-let-7e | -21.1 | 457 |
| bta-let-7e | -20.5 | 86  |
| bta-let-7e | -20.3 | 415 |
| bta-let-7e | -19.2 | 702 |
| bta-let-7e | -18.3 | 241 |
| bta-let-7e | -18.0 | 378 |
| bta-let-7e | -18.0 | 507 |
| bta-let-7e | -17.6 | 296 |
| bta-let-7e | -17.0 | 19  |
| bta-let-7e | -16.9 | 185 |
| bta-let-7e | -16.7 | 553 |
| bta-let-7e | -16.7 | 618 |
| bta-let-7e | -16.6 | 271 |
| bta-let-7e | -15.9 | 353 |
| bta-let-7e | -15.6 | 582 |
| bta-let-7e | -15.6 | 399 |
| bta-let-7e | -15.3 | 156 |
| bta-let-7e | -15.3 | 685 |
| bta-let-7e | -15.1 | 649 |
| bta-let-7e | -15.1 | 122 |
| bta-let-7e | -14.6 | 50  |
| bta-let-7e | -14.4 | 320 |

|             |       |     |
|-------------|-------|-----|
| bta-let-7e  | -12.7 | 738 |
| bta-let-7e  | -11.9 | 61  |
| bta-let-7e  | -10.8 | 671 |
| bta-let-7e  | -10.7 | 6   |
| bta-let-7e  | -10.4 | 141 |
| bta-let-7e  | -10.3 | 213 |
| bta-miR-15a | -21.2 | 10  |
| bta-miR-15a | -20.7 | 406 |
| bta-miR-15a | -20.1 | 649 |
| bta-miR-15a | -19.1 | 542 |
| bta-miR-15a | -19.0 | 570 |
| bta-miR-15a | -18.6 | 66  |
| bta-miR-15a | -17.6 | 516 |
| bta-miR-15a | -17.6 | 106 |
| bta-miR-15a | -16.6 | 361 |
| bta-miR-15a | -16.1 | 737 |
| bta-miR-15a | -15.4 | 271 |
| bta-miR-15a | -15.3 | 602 |
| bta-miR-15a | -15.2 | 122 |
| bta-miR-15a | -14.5 | 481 |
| bta-miR-15a | -13.9 | 554 |
| bta-miR-15a | -13.5 | 28  |
| bta-miR-15a | -13.3 | 165 |
| bta-miR-15a | -13.3 | 242 |
| bta-miR-15a | -12.9 | 339 |
| bta-miR-15a | -12.6 | 423 |
| bta-miR-15a | -11.9 | 454 |
| bta-miR-15a | -11.0 | 696 |
| bta-miR-15a | -10.6 | 298 |
| bta-miR-15a | -10.0 | 508 |
| bta-miR-195 | -25.8 | 408 |
| bta-miR-195 | -23.0 | 569 |
| bta-miR-195 | -22.8 | 51  |
| bta-miR-195 | -22.6 | 668 |
| bta-miR-195 | -20.5 | 531 |
| bta-miR-195 | -19.8 | 109 |
| bta-miR-195 | -19.6 | 7   |
| bta-miR-195 | -19.5 | 251 |
| bta-miR-195 | -17.9 | 740 |
| bta-miR-195 | -17.1 | 473 |
| bta-miR-195 | -16.9 | 515 |
| bta-miR-195 | -15.8 | 360 |
| bta-miR-195 | -15.5 | 425 |
| bta-miR-195 | -14.8 | 76  |
| bta-miR-195 | -14.5 | 172 |
| bta-miR-195 | -14.5 | 553 |
| bta-miR-195 | -14.2 | 644 |
| bta-miR-195 | -13.8 | 30  |
| bta-miR-195 | -13.7 | 605 |
| bta-miR-195 | -13.6 | 283 |
| bta-miR-195 | -13.6 | 206 |
| bta-miR-195 | -13.1 | 126 |
| bta-miR-195 | -11.9 | 454 |
| bta-miR-195 | -10.7 | 493 |
| bta-miR-19a | -19.5 | 653 |
| bta-miR-19a | -19.4 | 5   |
| bta-miR-19a | -18.9 | 539 |
| bta-miR-19a | -17.3 | 358 |
| bta-miR-19a | -16.5 | 491 |

|             |       |     |
|-------------|-------|-----|
| bta-miR-19a | -16.4 | 516 |
| bta-miR-19a | -16.2 | 597 |
| bta-miR-19a | -16.1 | 410 |
| bta-miR-19a | -15.7 | 263 |
| bta-miR-19a | -14.5 | 165 |
| bta-miR-19a | -14.2 | 463 |
| bta-miR-19a | -14.2 | 199 |
| bta-miR-19a | -14.0 | 683 |
| bta-miR-19a | -13.6 | 67  |
| bta-miR-19a | -13.5 | 100 |
| bta-miR-19a | -11.2 | 575 |
| bta-miR-19a | -10.2 | 37  |
| bta-miR-19a | -10.2 | 307 |
| bta-miR-19a | -10.2 | 435 |
| bta-miR-19a | -10.1 | 628 |
| bta-miR-19a | -10.1 | 737 |
| bta-miR-19b | -21.8 | 653 |
| bta-miR-19b | -21.7 | 5   |
| bta-miR-19b | -20.7 | 539 |
| bta-miR-19b | -19.6 | 358 |
| bta-miR-19b | -18.8 | 491 |
| bta-miR-19b | -18.4 | 410 |
| bta-miR-19b | -18.1 | 597 |
| bta-miR-19b | -17.6 | 263 |
| bta-miR-19b | -16.5 | 463 |
| bta-miR-19b | -16.4 | 165 |
| bta-miR-19b | -15.9 | 67  |
| bta-miR-19b | -15.7 | 694 |
| bta-miR-19b | -14.9 | 100 |
| bta-miR-19b | -14.2 | 516 |
| bta-miR-19b | -12.5 | 199 |
| bta-miR-19b | -11.8 | 576 |
| bta-miR-19b | -11.2 | 230 |
| bta-miR-19b | -10.9 | 741 |
| bta-miR-19b | -10.4 | 435 |
| bta-miR-19b | -10.2 | 37  |
| bta-miR-19b | -10.2 | 307 |
| bta-miR-19b | -10.1 | 628 |
| bta-miR-19b | -10.0 | 683 |
| bta-miR-204 | -26.8 | 604 |
| bta-miR-204 | -23.9 | 418 |
| bta-miR-204 | -23.7 | 575 |
| bta-miR-204 | -20.7 | 203 |
| bta-miR-204 | -19.9 | 11  |
| bta-miR-204 | -18.8 | 154 |
| bta-miR-204 | -18.5 | 481 |
| bta-miR-204 | -18.1 | 66  |
| bta-miR-204 | -15.6 | 269 |
| bta-miR-204 | -12.7 | 654 |
| bta-miR-204 | -12.6 | 351 |
| bta-miR-204 | -12.4 | 109 |
| bta-miR-204 | -12.0 | 454 |
| bta-miR-204 | -11.1 | 86  |
| bta-miR-204 | -10.9 | 41  |
| bta-miR-331 | -30.9 | 615 |
| bta-miR-331 | -27.0 | 59  |
| bta-miR-331 | -26.8 | 416 |
| bta-miR-331 | -24.5 | 453 |
| bta-miR-331 | -23.5 | 214 |



|                |       |     |
|----------------|-------|-----|
| bta-miR-331    | -21.3 | 598 |
| bta-miR-331    | -21.2 | 267 |
| bta-miR-331    | -21.0 | 98  |
| bta-miR-331    | -20.7 | 154 |
| bta-miR-331    | -20.1 | 5   |
| bta-miR-331    | -18.3 | 502 |
| bta-miR-331    | -16.3 | 345 |
| bta-miR-331    | -16.0 | 567 |
| bta-miR-331    | -14.8 | 26  |
| bta-miR-331    | -13.8 | 390 |
| bta-miR-331    | -11.9 | 181 |
| bta-miR-331    | -11.7 | 707 |
| bta-miR-331    | -11.3 | 663 |
| bta-miR-331    | -10.8 | 304 |
| bta-miR-331    | -10.4 | 127 |
| bta-miR-331    | -10.3 | 330 |
| bta-miR-331    | -10.3 | 740 |
| bta-miR-331    | -10.1 | 142 |
| bta-miR-331    | -10.0 | 135 |
| bta-miR-331    | -10.0 | 324 |
| bta-miR-331    | -10.0 | 119 |
| bta-miR-34a    | -27.2 | 407 |
| bta-miR-34a    | -26.3 | 106 |
| bta-miR-34a    | -23.8 | 340 |
| bta-miR-34a    | -22.3 | 165 |
| bta-miR-34a    | -21.9 | 66  |
| bta-miR-34a    | -20.5 | 647 |
| bta-miR-34a    | -20.2 | 12  |
| bta-miR-34a    | -19.9 | 602 |
| bta-miR-34a    | -19.5 | 457 |
| bta-miR-34a    | -19.4 | 545 |
| bta-miR-34a    | -19.3 | 570 |
| bta-miR-34a    | -18.7 | 366 |
| bta-miR-34a    | -17.6 | 34  |
| bta-miR-34a    | -17.4 | 512 |
| bta-miR-34a    | -16.8 | 623 |
| bta-miR-34a    | -16.6 | 263 |
| bta-miR-34a    | -16.1 | 736 |
| bta-miR-34a    | -16.0 | 206 |
| bta-miR-34a    | -14.6 | 488 |
| bta-miR-34a    | -14.5 | 431 |
| bta-miR-34a    | -14.2 | 149 |
| bta-miR-34a    | -14.0 | 283 |
| bta-miR-34a    | -13.2 | 243 |
| bta-miR-34a    | -12.2 | 700 |
| bta-miR-34a    | -11.6 | 1   |
| bta-miR-34a    | -10.8 | 318 |
| bta-miR-34a    | -10.8 | 595 |
| bta-miR-34a    | -10.7 | 385 |
| bta-miR-34a    | -10.6 | 129 |
| bta-miR-365-5p | -31.2 | 23  |
| bta-miR-365-5p | -29.8 | 382 |
| bta-miR-365-5p | -29.4 | 244 |
| bta-miR-365-5p | -25.6 | 565 |
| bta-miR-365-5p | -25.0 | 106 |
| bta-miR-365-5p | -23.3 | 87  |
| bta-miR-365-5p | -23.3 | 148 |
| bta-miR-365-5p | -22.7 | 473 |
| bta-miR-365-5p | -22.5 | 427 |

|                |       |     |
|----------------|-------|-----|
| bta-miR-365-5p | -22.4 | 319 |
| bta-miR-365-5p | -22.2 | 353 |
| bta-miR-365-5p | -22.1 | 206 |
| bta-miR-365-5p | -21.2 | 488 |
| bta-miR-365-5p | -19.4 | 56  |
| bta-miR-365-5p | -19.2 | 271 |
| bta-miR-365-5p | -18.0 | 457 |
| bta-miR-365-5p | -17.6 | 186 |
| bta-miR-365-5p | -17.3 | 300 |
| bta-miR-365-5p | -16.9 | 4   |
| bta-miR-365-5p | -16.6 | 695 |
| bta-miR-365-5p | -15.2 | 654 |
| bta-miR-365-5p | -14.9 | 137 |
| bta-miR-365-5p | -14.8 | 624 |
| bta-miR-365-5p | -13.9 | 400 |
| bta-miR-365-5p | -13.1 | 544 |
| bta-miR-365-5p | -13.0 | 519 |
| bta-miR-365-5p | -12.8 | 46  |
| bta-miR-365-5p | -12.8 | 583 |
| bta-miR-365-5p | -12.3 | 602 |
| bta-miR-365-5p | -11.6 | 739 |
| bta-miR-365-3p | -24.7 | 612 |
| bta-miR-365-3p | -22.0 | 69  |
| bta-miR-365-3p | -19.5 | 452 |
| bta-miR-365-3p | -17.7 | 268 |
| bta-miR-365-3p | -14.9 | 11  |
| bta-miR-365-3p | -14.5 | 630 |
| bta-miR-365-3p | -13.8 | 217 |
| bta-miR-365-3p | -13.6 | 584 |
| bta-miR-365-3p | -13.1 | 499 |
| bta-miR-365-3p | -12.9 | 406 |
| bta-miR-365-3p | -12.7 | 438 |
| bta-miR-365-3p | -12.3 | 174 |
| bta-miR-365-3p | -12.0 | 114 |
| bta-miR-365-3p | -11.6 | 423 |
| bta-miR-365-3p | -10.6 | 279 |
| bta-miR-365-3p | -10.5 | 651 |
| bta-miR-365-3p | -10.2 | 710 |
| bta-miR-365-3p | -10.0 | 26  |
| bta-miR-374a   | -18.6 | 7   |
| bta-miR-374a   | -14.9 | 56  |
| bta-miR-374a   | -14.8 | 537 |
| bta-miR-374a   | -14.1 | 654 |
| bta-miR-374a   | -13.7 | 702 |
| bta-miR-374a   | -13.3 | 560 |
| bta-miR-374a   | -13.2 | 520 |
| bta-miR-374a   | -13.1 | 606 |
| bta-miR-374a   | -12.9 | 457 |
| bta-miR-374a   | -12.7 | 624 |
| bta-miR-374a   | -12.2 | 277 |
| bta-miR-374a   | -11.7 | 81  |
| bta-miR-374a   | -11.6 | 740 |
| bta-miR-374a   | -10.6 | 415 |
| bta-miR-374a   | -10.4 | 489 |
| bta-miR-497    | -23.7 | 10  |
| bta-miR-497    | -23.2 | 405 |
| bta-miR-497    | -22.1 | 360 |
| bta-miR-497    | -21.9 | 66  |
| bta-miR-497    | -21.9 | 562 |

|             |       |     |
|-------------|-------|-----|
| bta-miR-497 | -21.5 | 100 |
| bta-miR-497 | -20.4 | 505 |
| bta-miR-497 | -19.7 | 602 |
| bta-miR-497 | -19.6 | 271 |
| bta-miR-497 | -18.9 | 649 |
| bta-miR-497 | -18.5 | 544 |
| bta-miR-497 | -17.5 | 485 |
| bta-miR-497 | -17.3 | 160 |
| bta-miR-497 | -17.0 | 729 |
| bta-miR-497 | -15.9 | 28  |
| bta-miR-497 | -15.7 | 122 |
| bta-miR-497 | -15.0 | 425 |
| bta-miR-497 | -14.3 | 256 |
| bta-miR-497 | -14.2 | 199 |
| bta-miR-497 | -13.4 | 49  |
| bta-miR-497 | -12.2 | 233 |
| bta-miR-497 | -11.2 | 147 |
| bta-miR-497 | -11.1 | 460 |
| bta-miR-497 | -10.8 | 298 |
| bta-miR-497 | -10.6 | 339 |
| bta-miR-497 | -10.1 | 631 |
| bta-miR-660 | -23.1 | 472 |
| bta-miR-660 | -22.0 | 586 |
| bta-miR-660 | -21.2 | 85  |
| bta-miR-660 | -21.0 | 12  |
| bta-miR-660 | -20.1 | 165 |
| bta-miR-660 | -19.4 | 50  |
| bta-miR-660 | -19.4 | 243 |
| bta-miR-660 | -19.1 | 623 |
| bta-miR-660 | -17.9 | 410 |
| bta-miR-660 | -17.9 | 429 |
| bta-miR-660 | -16.9 | 205 |
| bta-miR-660 | -16.7 | 559 |
| bta-miR-660 | -16.3 | 513 |
| bta-miR-660 | -15.9 | 361 |
| bta-miR-660 | -15.1 | 456 |
| bta-miR-660 | -14.5 | 539 |
| bta-miR-660 | -13.7 | 282 |
| bta-miR-660 | -13.4 | 638 |
| bta-miR-660 | -13.0 | 128 |
| bta-miR-660 | -12.1 | 737 |
| bta-miR-660 | -12.0 | 183 |
| bta-miR-660 | -11.6 | 299 |
| bta-miR-660 | -11.3 | 500 |
| bta-miR-660 | -10.9 | 691 |
| bta-miR-660 | -10.6 | 116 |
| bta-miR-99b | -33.0 | 606 |
| bta-miR-99b | -23.4 | 66  |
| bta-miR-99b | -22.4 | 450 |
| bta-miR-99b | -21.3 | 494 |
| bta-miR-99b | -21.2 | 573 |
| bta-miR-99b | -20.6 | 654 |
| bta-miR-99b | -19.6 | 415 |
| bta-miR-99b | -18.2 | 8   |
| bta-miR-99b | -16.2 | 172 |
| bta-miR-99b | -16.0 | 381 |
| bta-miR-99b | -14.3 | 206 |
| bta-miR-99b | -13.8 | 35  |
| bta-miR-99b | -13.7 | 252 |

|              |       |     |
|--------------|-------|-----|
| bta-miR-99b  | -12.9 | 736 |
| bta-miR-99b  | -12.8 | 527 |
| bta-miR-99b  | -12.4 | 109 |
| bta-miR-99b  | -12.3 | 271 |
| bta-miR-99b  | -10.2 | 560 |
| bta-miR-99b  | -10.0 | 85  |
| bta-miR-1    | -18.0 | 304 |
| bta-miR-1    | -17.2 | 493 |
| bta-miR-1    | -15.8 | 628 |
| bta-miR-1    | -15.0 | 206 |
| bta-miR-1    | -14.9 | 66  |
| bta-miR-1    | -14.7 | 283 |
| bta-miR-1    | -14.6 | 697 |
| bta-miR-1    | -14.1 | 106 |
| bta-miR-1    | -13.2 | 679 |
| bta-miR-1    | -13.1 | 544 |
| bta-miR-1    | -13.0 | 518 |
| bta-miR-1    | -12.9 | 10  |
| bta-miR-1    | -12.9 | 379 |
| bta-miR-1    | -12.8 | 149 |
| bta-miR-1    | -12.6 | 410 |
| bta-miR-1    | -12.3 | 53  |
| bta-miR-1    | -12.2 | 457 |
| bta-miR-1    | -11.1 | 584 |
| bta-miR-1    | -10.9 | 473 |
| bta-miR-1    | -10.3 | 353 |
| bta-miR-1    | -10.1 | 733 |
| bta-miR-1    | -10.1 | 661 |
| bta-miR-1    | -10.0 | 244 |
| bta-miR-100  | -26.8 | 606 |
| bta-miR-100  | -24.2 | 494 |
| bta-miR-100  | -18.1 | 66  |
| bta-miR-100  | -17.6 | 464 |
| bta-miR-100  | -16.3 | 415 |
| bta-miR-100  | -15.9 | 11  |
| bta-miR-100  | -15.2 | 434 |
| bta-miR-100  | -15.1 | 373 |
| bta-miR-100  | -14.7 | 35  |
| bta-miR-100  | -14.6 | 573 |
| bta-miR-100  | -14.2 | 654 |
| bta-miR-100  | -14.1 | 106 |
| bta-miR-100  | -13.9 | 702 |
| bta-miR-100  | -12.9 | 206 |
| bta-miR-100  | -12.5 | 150 |
| bta-miR-100  | -12.5 | 344 |
| bta-miR-100  | -12.1 | 450 |
| bta-miR-100  | -11.9 | 551 |
| bta-miR-100  | -11.8 | 271 |
| bta-miR-100  | -11.5 | 736 |
| bta-miR-100  | -11.1 | 389 |
| bta-miR-100  | -11.0 | 121 |
| bta-miR-105b | -24.0 | 473 |
| bta-miR-105b | -23.9 | 571 |
| bta-miR-105b | -22.6 | 606 |
| bta-miR-105b | -22.0 | 408 |
| bta-miR-105b | -20.3 | 446 |
| bta-miR-105b | -19.6 | 232 |
| bta-miR-105b | -19.5 | 51  |
| bta-miR-105b | -18.3 | 9   |

|              |       |     |
|--------------|-------|-----|
| bta-miR-105b | -18.2 | 341 |
| bta-miR-105b | -17.9 | 172 |
| bta-miR-105b | -17.2 | 263 |
| bta-miR-105b | -15.7 | 649 |
| bta-miR-105b | -15.3 | 216 |
| bta-miR-105b | -15.2 | 367 |
| bta-miR-105b | -15.0 | 99  |
| bta-miR-105b | -14.5 | 510 |
| bta-miR-105b | -14.5 | 34  |
| bta-miR-105b | -14.2 | 73  |
| bta-miR-105b | -12.7 | 495 |
| bta-miR-105b | -12.0 | 595 |
| bta-miR-105b | -10.9 | 541 |
| bta-miR-105b | -10.9 | 551 |
| bta-miR-105b | -10.9 | 669 |
| bta-miR-105a | -25.2 | 408 |
| bta-miR-105a | -24.1 | 473 |
| bta-miR-105a | -21.9 | 606 |
| bta-miR-105a | -20.8 | 51  |
| bta-miR-105a | -20.6 | 199 |
| bta-miR-105a | -20.4 | 263 |
| bta-miR-105a | -20.1 | 571 |
| bta-miR-105a | -20.0 | 7   |
| bta-miR-105a | -19.6 | 232 |
| bta-miR-105a | -19.3 | 447 |
| bta-miR-105a | -18.3 | 167 |
| bta-miR-105a | -17.7 | 341 |
| bta-miR-105a | -17.2 | 106 |
| bta-miR-105a | -17.0 | 495 |
| bta-miR-105a | -16.9 | 510 |
| bta-miR-105a | -15.5 | 367 |
| bta-miR-105a | -15.3 | 34  |
| bta-miR-105a | -14.7 | 119 |
| bta-miR-105a | -12.7 | 636 |
| bta-miR-105a | -11.6 | 595 |
| bta-miR-105a | -11.4 | 560 |
| bta-miR-105a | -11.3 | 669 |
| bta-miR-105a | -11.3 | 147 |
| bta-miR-105a | -10.9 | 541 |
| bta-miR-106b | -21.6 | 4   |
| bta-miR-106b | -21.1 | 490 |
| bta-miR-106b | -20.7 | 537 |
| bta-miR-106b | -20.6 | 654 |
| bta-miR-106b | -20.5 | 369 |
| bta-miR-106b | -18.6 | 566 |
| bta-miR-106b | -18.5 | 416 |
| bta-miR-106b | -17.6 | 112 |
| bta-miR-106b | -16.7 | 60  |
| bta-miR-106b | -16.5 | 385 |
| bta-miR-106b | -15.8 | 271 |
| bta-miR-106b | -15.4 | 87  |
| bta-miR-106b | -15.1 | 199 |
| bta-miR-106b | -14.5 | 526 |
| bta-miR-106b | -14.2 | 473 |
| bta-miR-106b | -13.8 | 615 |
| bta-miR-106b | -13.8 | 684 |
| bta-miR-106b | -13.0 | 250 |
| bta-miR-106b | -12.6 | 172 |
| bta-miR-106b | -12.2 | 428 |

|              |       |     |
|--------------|-------|-----|
| bta-miR-106b | -12.1 | 403 |
| bta-miR-106b | -12.0 | 639 |
| bta-miR-106b | -12.0 | 38  |
| bta-miR-106b | -11.9 | 360 |
| bta-miR-106b | -11.9 | 739 |
| bta-miR-106b | -11.8 | 25  |
| bta-miR-106b | -11.5 | 591 |
| bta-miR-106b | -11.3 | 161 |
| bta-miR-106b | -11.0 | 286 |
| bta-miR-106b | -10.9 | 215 |
| bta-miR-106b | -10.6 | 344 |
| bta-miR-106b | -10.1 | 133 |
| bta-miR-124b | -22.7 | 503 |
| bta-miR-124b | -22.4 | 413 |
| bta-miR-124b | -20.0 | 155 |
| bta-miR-124b | -19.7 | 39  |
| bta-miR-124b | -19.4 | 17  |
| bta-miR-124b | -19.0 | 654 |
| bta-miR-124b | -18.9 | 370 |
| bta-miR-124b | -18.8 | 542 |
| bta-miR-124b | -18.8 | 605 |
| bta-miR-124b | -18.6 | 115 |
| bta-miR-124b | -18.4 | 576 |
| bta-miR-124b | -18.2 | 341 |
| bta-miR-124b | -18.0 | 464 |
| bta-miR-124b | -17.9 | 85  |
| bta-miR-124b | -17.7 | 488 |
| bta-miR-124b | -17.1 | 177 |
| bta-miR-124b | -16.5 | 685 |
| bta-miR-124b | -16.0 | 231 |
| bta-miR-124b | -15.7 | 299 |
| bta-miR-124b | -15.3 | 270 |
| bta-miR-124b | -14.6 | 400 |
| bta-miR-124b | -13.9 | 1   |
| bta-miR-124b | -13.7 | 594 |
| bta-miR-124b | -13.4 | 739 |
| bta-miR-124b | -13.2 | 144 |
| bta-miR-124b | -12.0 | 199 |
| bta-miR-124b | -11.7 | 708 |
| bta-miR-124b | -11.6 | 315 |
| bta-miR-124b | -11.6 | 532 |
| bta-miR-124b | -11.5 | 631 |
| bta-miR-124b | -11.4 | 565 |
| bta-miR-124b | -11.3 | 384 |
| bta-miR-124b | -10.7 | 326 |
| bta-miR-124b | -10.4 | 448 |
| bta-miR-129  | -26.1 | 8   |
| bta-miR-129  | -24.9 | 155 |
| bta-miR-129  | -24.6 | 424 |
| bta-miR-129  | -23.9 | 108 |
| bta-miR-129  | -23.2 | 233 |
| bta-miR-129  | -22.4 | 464 |
| bta-miR-129  | -22.1 | 358 |
| bta-miR-129  | -20.7 | 597 |
| bta-miR-129  | -20.5 | 65  |
| bta-miR-129  | -20.5 | 270 |
| bta-miR-129  | -20.2 | 123 |
| bta-miR-129  | -19.9 | 184 |
| bta-miR-129  | -19.7 | 406 |

|                |       |     |
|----------------|-------|-----|
| bta-miR-129    | -19.3 | 559 |
| bta-miR-129    | -18.3 | 326 |
| bta-miR-129    | -17.1 | 206 |
| bta-miR-129    | -16.8 | 617 |
| bta-miR-129    | -16.3 | 30  |
| bta-miR-129    | -16.1 | 97  |
| bta-miR-129    | -15.9 | 494 |
| bta-miR-129    | -15.6 | 514 |
| bta-miR-129    | -13.7 | 575 |
| bta-miR-129    | -13.4 | 135 |
| bta-miR-129    | -13.4 | 308 |
| bta-miR-129    | -13.2 | 736 |
| bta-miR-129    | -12.7 | 377 |
| bta-miR-129    | -12.5 | 663 |
| bta-miR-129    | -12.1 | 532 |
| bta-miR-129    | -11.1 | 389 |
| bta-miR-129    | -11.1 | 455 |
| bta-miR-129    | -10.7 | 252 |
| bta-miR-129    | -10.3 | 586 |
| bta-miR-129-5p | -26.1 | 8   |
| bta-miR-129-5p | -24.9 | 155 |
| bta-miR-129-5p | -24.6 | 424 |
| bta-miR-129-5p | -23.9 | 108 |
| bta-miR-129-5p | -23.2 | 233 |
| bta-miR-129-5p | -22.4 | 464 |
| bta-miR-129-5p | -22.1 | 358 |
| bta-miR-129-5p | -20.7 | 597 |
| bta-miR-129-5p | -20.5 | 65  |
| bta-miR-129-5p | -20.5 | 270 |
| bta-miR-129-5p | -20.2 | 123 |
| bta-miR-129-5p | -19.9 | 184 |
| bta-miR-129-5p | -19.7 | 406 |
| bta-miR-129-5p | -19.3 | 559 |
| bta-miR-129-5p | -18.3 | 326 |
| bta-miR-129-5p | -17.1 | 206 |
| bta-miR-129-5p | -16.8 | 617 |
| bta-miR-129-5p | -16.3 | 30  |
| bta-miR-129-5p | -16.1 | 97  |
| bta-miR-129-5p | -15.9 | 494 |
| bta-miR-129-5p | -15.6 | 514 |
| bta-miR-129-5p | -13.7 | 575 |
| bta-miR-129-5p | -13.4 | 135 |
| bta-miR-129-5p | -13.4 | 308 |
| bta-miR-129-5p | -13.2 | 736 |
| bta-miR-129-5p | -12.7 | 377 |
| bta-miR-129-5p | -12.5 | 663 |
| bta-miR-129-5p | -12.1 | 532 |
| bta-miR-129-5p | -11.1 | 389 |
| bta-miR-129-5p | -11.1 | 455 |
| bta-miR-129-5p | -10.7 | 252 |
| bta-miR-129-5p | -10.3 | 586 |
| bta-miR-129-3p | -31.1 | 606 |
| bta-miR-129-3p | -23.7 | 66  |
| bta-miR-129-3p | -22.2 | 448 |
| bta-miR-129-3p | -21.0 | 256 |
| bta-miR-129-3p | -19.9 | 408 |
| bta-miR-129-3p | -18.9 | 628 |
| bta-miR-129-3p | -18.0 | 473 |
| bta-miR-129-3p | -16.0 | 13  |

|                |       |     |
|----------------|-------|-----|
| bta-miR-129-3p | -16.0 | 497 |
| bta-miR-129-3p | -14.7 | 95  |
| bta-miR-129-3p | -14.1 | 538 |
| bta-miR-129-3p | -13.7 | 584 |
| bta-miR-129-3p | -13.7 | 172 |
| bta-miR-129-3p | -12.9 | 359 |
| bta-miR-129-3p | -12.5 | 231 |
| bta-miR-129-3p | -12.5 | 654 |
| bta-miR-129-3p | -11.9 | 697 |
| bta-miR-129-3p | -11.2 | 30  |
| bta-miR-129-3p | -11.1 | 152 |
| bta-miR-129-3p | -10.6 | 206 |
| bta-miR-129-3p | -10.2 | 562 |
| bta-miR-129-3p | -10.2 | 729 |
| bta-miR-130a   | -27.7 | 359 |
| bta-miR-130a   | -20.6 | 109 |
| bta-miR-130a   | -20.6 | 473 |
| bta-miR-130a   | -19.8 | 624 |
| bta-miR-130a   | -19.8 | 408 |
| bta-miR-130a   | -18.8 | 167 |
| bta-miR-130a   | -18.4 | 51  |
| bta-miR-130a   | -18.4 | 428 |
| bta-miR-130a   | -17.5 | 562 |
| bta-miR-130a   | -17.4 | 244 |
| bta-miR-130a   | -17.0 | 3   |
| bta-miR-130a   | -17.0 | 518 |
| bta-miR-130a   | -15.9 | 191 |
| bta-miR-130a   | -15.2 | 668 |
| bta-miR-130a   | -15.0 | 590 |
| bta-miR-130a   | -14.7 | 30  |
| bta-miR-130a   | -14.5 | 126 |
| bta-miR-130a   | -14.4 | 306 |
| bta-miR-130a   | -13.7 | 653 |
| bta-miR-130a   | -13.6 | 716 |
| bta-miR-130a   | -13.2 | 88  |
| bta-miR-130a   | -12.9 | 336 |
| bta-miR-130a   | -12.8 | 95  |
| bta-miR-130a   | -12.6 | 141 |
| bta-miR-130a   | -12.6 | 692 |
| bta-miR-130a   | -12.1 | 283 |
| bta-miR-130a   | -11.7 | 538 |
| bta-miR-130a   | -11.1 | 235 |
| bta-miR-130a   | -10.4 | 388 |
| bta-miR-130b   | -23.4 | 359 |
| bta-miR-130b   | -21.2 | 483 |
| bta-miR-130b   | -19.1 | 562 |
| bta-miR-130b   | -19.0 | 167 |
| bta-miR-130b   | -18.5 | 633 |
| bta-miR-130b   | -18.3 | 518 |
| bta-miR-130b   | -18.1 | 88  |
| bta-miR-130b   | -18.1 | 408 |
| bta-miR-130b   | -17.9 | 428 |
| bta-miR-130b   | -17.9 | 244 |
| bta-miR-130b   | -17.2 | 3   |
| bta-miR-130b   | -16.9 | 30  |
| bta-miR-130b   | -16.9 | 283 |
| bta-miR-130b   | -16.6 | 668 |
| bta-miR-130b   | -16.5 | 51  |
| bta-miR-130b   | -16.0 | 142 |



|              |       |     |
|--------------|-------|-----|
| bta-miR-130b | -14.3 | 260 |
| bta-miR-130b | -13.7 | 191 |
| bta-miR-130b | -13.5 | 697 |
| bta-miR-130b | -12.9 | 388 |
| bta-miR-130b | -12.7 | 624 |
| bta-miR-130b | -12.4 | 715 |
| bta-miR-130b | -12.4 | 457 |
| bta-miR-130b | -11.9 | 590 |
| bta-miR-130b | -11.8 | 119 |
| bta-miR-130b | -11.1 | 235 |
| bta-miR-130b | -11.0 | 544 |
| bta-miR-130b | -10.1 | 743 |
| bta-miR-130b | -10.0 | 336 |
| bta-miR-133a | -27.5 | 456 |
| bta-miR-133a | -25.2 | 419 |
| bta-miR-133a | -25.1 | 605 |
| bta-miR-133a | -23.6 | 64  |
| bta-miR-133a | -19.7 | 12  |
| bta-miR-133a | -19.2 | 559 |
| bta-miR-133a | -18.6 | 495 |
| bta-miR-133a | -17.9 | 107 |
| bta-miR-133a | -17.8 | 586 |
| bta-miR-133a | -17.1 | 38  |
| bta-miR-133a | -16.5 | 165 |
| bta-miR-133a | -15.9 | 219 |
| bta-miR-133a | -15.9 | 737 |
| bta-miR-133a | -15.5 | 630 |
| bta-miR-133a | -15.4 | 653 |
| bta-miR-133a | -14.5 | 243 |
| bta-miR-133a | -14.5 | 358 |
| bta-miR-133a | -12.0 | 404 |
| bta-miR-133a | -11.1 | 93  |
| bta-miR-133a | -10.8 | 698 |
| bta-miR-133a | -10.6 | 337 |
| bta-miR-133a | -10.2 | 344 |
| bta-miR-133b | -27.5 | 456 |
| bta-miR-133b | -25.2 | 419 |
| bta-miR-133b | -25.1 | 605 |
| bta-miR-133b | -23.9 | 64  |
| bta-miR-133b | -19.7 | 12  |
| bta-miR-133b | -19.2 | 559 |
| bta-miR-133b | -17.8 | 586 |
| bta-miR-133b | -17.6 | 494 |
| bta-miR-133b | -17.1 | 38  |
| bta-miR-133b | -16.3 | 108 |
| bta-miR-133b | -15.9 | 219 |
| bta-miR-133b | -15.9 | 737 |
| bta-miR-133b | -15.5 | 630 |
| bta-miR-133b | -15.4 | 653 |
| bta-miR-133b | -15.1 | 166 |
| bta-miR-133b | -14.5 | 243 |
| bta-miR-133b | -14.5 | 358 |
| bta-miR-133b | -12.2 | 393 |
| bta-miR-133b | -11.1 | 93  |
| bta-miR-133b | -10.8 | 698 |
| bta-miR-133b | -10.6 | 337 |
| bta-miR-133b | -10.2 | 344 |
| bta-miR-134  | -23.6 | 382 |
| bta-miR-134  | -23.3 | 468 |

|              |       |     |
|--------------|-------|-----|
| bta-miR-134  | -21.5 | 34  |
| bta-miR-134  | -21.4 | 136 |
| bta-miR-134  | -20.8 | 2   |
| bta-miR-134  | -19.6 | 109 |
| bta-miR-134  | -19.4 | 657 |
| bta-miR-134  | -19.3 | 581 |
| bta-miR-134  | -18.4 | 624 |
| bta-miR-134  | -17.6 | 260 |
| bta-miR-134  | -17.4 | 549 |
| bta-miR-134  | -16.8 | 502 |
| bta-miR-134  | -16.5 | 331 |
| bta-miR-134  | -16.5 | 416 |
| bta-miR-134  | -16.3 | 73  |
| bta-miR-134  | -15.3 | 738 |
| bta-miR-134  | -15.1 | 189 |
| bta-miR-134  | -14.3 | 156 |
| bta-miR-134  | -14.2 | 367 |
| bta-miR-134  | -14.0 | 210 |
| bta-miR-134  | -12.8 | 520 |
| bta-miR-134  | -12.7 | 454 |
| bta-miR-134  | -12.2 | 690 |
| bta-miR-134  | -12.2 | 59  |
| bta-miR-134  | -11.7 | 246 |
| bta-miR-134  | -11.5 | 572 |
| bta-miR-134  | -11.0 | 309 |
| bta-miR-134  | -10.3 | 290 |
| bta-miR-135a | -19.5 | 232 |
| bta-miR-135a | -19.2 | 22  |
| bta-miR-135a | -18.9 | 172 |
| bta-miR-135a | -18.8 | 447 |
| bta-miR-135a | -17.7 | 606 |
| bta-miR-135a | -17.4 | 147 |
| bta-miR-135a | -17.2 | 106 |
| bta-miR-135a | -16.9 | 66  |
| bta-miR-135a | -16.9 | 382 |
| bta-miR-135a | -15.9 | 263 |
| bta-miR-135a | -15.6 | 467 |
| bta-miR-135a | -15.3 | 415 |
| bta-miR-135a | -15.2 | 654 |
| bta-miR-135a | -14.9 | 206 |
| bta-miR-135a | -14.5 | 492 |
| bta-miR-135a | -13.7 | 731 |
| bta-miR-135a | -12.7 | 555 |
| bta-miR-135a | -12.0 | 567 |
| bta-miR-135a | -11.9 | 345 |
| bta-miR-135a | -11.5 | 299 |
| bta-miR-135a | -11.3 | 630 |
| bta-miR-135a | -10.5 | 594 |
| bta-miR-135a | -10.1 | 364 |
| bta-miR-135a | -10.1 | 434 |
| bta-miR-135b | -21.5 | 447 |
| bta-miR-135b | -20.4 | 606 |
| bta-miR-135b | -19.5 | 22  |
| bta-miR-135b | -18.3 | 147 |
| bta-miR-135b | -18.2 | 172 |
| bta-miR-135b | -18.1 | 206 |
| bta-miR-135b | -18.1 | 106 |
| bta-miR-135b | -17.4 | 66  |
| bta-miR-135b | -17.3 | 654 |

|              |       |     |
|--------------|-------|-----|
| bta-miR-135b | -16.9 | 382 |
| bta-miR-135b | -16.6 | 492 |
| bta-miR-135b | -15.9 | 263 |
| bta-miR-135b | -15.3 | 415 |
| bta-miR-135b | -14.9 | 467 |
| bta-miR-135b | -14.1 | 345 |
| bta-miR-135b | -13.5 | 630 |
| bta-miR-135b | -12.5 | 567 |
| bta-miR-135b | -12.2 | 554 |
| bta-miR-135b | -11.8 | 738 |
| bta-miR-135b | -11.1 | 7   |
| bta-miR-135b | -10.5 | 299 |
| bta-miR-135b | -10.2 | 598 |
| bta-miR-135b | -10.1 | 364 |
| bta-miR-135b | -10.1 | 434 |
| bta-miR-136  | -22.6 | 52  |
| bta-miR-136  | -21.6 | 209 |
| bta-miR-136  | -21.0 | 596 |
| bta-miR-136  | -21.0 | 259 |
| bta-miR-136  | -20.6 | 461 |
| bta-miR-136  | -19.6 | 342 |
| bta-miR-136  | -19.3 | 431 |
| bta-miR-136  | -18.4 | 484 |
| bta-miR-136  | -16.1 | 391 |
| bta-miR-136  | -16.0 | 191 |
| bta-miR-136  | -15.9 | 98  |
| bta-miR-136  | -15.8 | 5   |
| bta-miR-136  | -15.4 | 639 |
| bta-miR-136  | -15.1 | 164 |
| bta-miR-136  | -14.3 | 363 |
| bta-miR-136  | -14.1 | 572 |
| bta-miR-136  | -13.4 | 23  |
| bta-miR-136  | -12.9 | 325 |
| bta-miR-136  | -12.7 | 629 |
| bta-miR-136  | -12.6 | 292 |
| bta-miR-136  | -12.3 | 715 |
| bta-miR-136  | -11.9 | 143 |
| bta-miR-136  | -11.3 | 451 |
| bta-miR-136  | -11.3 | 692 |
| bta-miR-136  | -11.0 | 564 |
| bta-miR-136  | -10.4 | 120 |
| bta-miR-136  | -10.4 | 454 |
| bta-miR-136  | -10.1 | 236 |
| bta-miR-136  | -10.0 | 247 |
| bta-miR-137  | -19.8 | 627 |
| bta-miR-137  | -17.4 | 14  |
| bta-miR-137  | -16.9 | 543 |
| bta-miR-137  | -16.4 | 39  |
| bta-miR-137  | -15.6 | 493 |
| bta-miR-137  | -14.0 | 458 |
| bta-miR-137  | -13.8 | 521 |
| bta-miR-137  | -13.5 | 594 |
| bta-miR-137  | -13.5 | 686 |
| bta-miR-137  | -13.1 | 69  |
| bta-miR-137  | -13.1 | 185 |
| bta-miR-137  | -13.1 | 658 |
| bta-miR-137  | -12.7 | 256 |
| bta-miR-137  | -12.7 | 377 |
| bta-miR-137  | -12.2 | 708 |

|             |       |     |
|-------------|-------|-----|
| bta-miR-137 | -11.6 | 206 |
| bta-miR-137 | -11.1 | 421 |
| bta-miR-137 | -11.0 | 341 |
| bta-miR-137 | -11.0 | 477 |
| bta-miR-137 | -10.9 | 614 |
| bta-miR-137 | -10.8 | 112 |
| bta-miR-137 | -10.8 | 561 |
| bta-miR-137 | -10.5 | 277 |
| bta-miR-137 | -10.2 | 305 |
| bta-miR-141 | -20.7 | 4   |
| bta-miR-141 | -20.3 | 342 |
| bta-miR-141 | -19.7 | 474 |
| bta-miR-141 | -18.9 | 384 |
| bta-miR-141 | -18.3 | 501 |
| bta-miR-141 | -17.9 | 564 |
| bta-miR-141 | -17.1 | 120 |
| bta-miR-141 | -17.0 | 23  |
| bta-miR-141 | -17.0 | 52  |
| bta-miR-141 | -16.0 | 639 |
| bta-miR-141 | -16.0 | 237 |
| bta-miR-141 | -14.8 | 87  |
| bta-miR-141 | -14.5 | 258 |
| bta-miR-141 | -14.1 | 416 |
| bta-miR-141 | -13.3 | 716 |
| bta-miR-141 | -13.3 | 613 |
| bta-miR-141 | -13.2 | 665 |
| bta-miR-141 | -13.1 | 143 |
| bta-miR-141 | -13.1 | 210 |
| bta-miR-141 | -12.6 | 532 |
| bta-miR-141 | -12.3 | 191 |
| bta-miR-141 | -12.3 | 164 |
| bta-miR-141 | -12.0 | 692 |
| bta-miR-141 | -11.9 | 681 |
| bta-miR-141 | -11.7 | 74  |
| bta-miR-141 | -11.6 | 428 |
| bta-miR-141 | -11.6 | 457 |
| bta-miR-141 | -11.0 | 109 |
| bta-miR-141 | -10.9 | 299 |
| bta-miR-141 | -10.6 | 624 |
| bta-miR-141 | -10.3 | 228 |
| bta-miR-143 | -21.8 | 622 |
| bta-miR-143 | -21.5 | 506 |
| bta-miR-143 | -20.5 | 481 |
| bta-miR-143 | -20.2 | 356 |
| bta-miR-143 | -20.1 | 269 |
| bta-miR-143 | -19.2 | 455 |
| bta-miR-143 | -18.8 | 559 |
| bta-miR-143 | -18.5 | 12  |
| bta-miR-143 | -17.4 | 114 |
| bta-miR-143 | -17.2 | 71  |
| bta-miR-143 | -17.0 | 184 |
| bta-miR-143 | -15.7 | 597 |
| bta-miR-143 | -15.6 | 407 |
| bta-miR-143 | -15.6 | 242 |
| bta-miR-143 | -14.2 | 653 |
| bta-miR-143 | -13.4 | 539 |
| bta-miR-143 | -12.8 | 388 |
| bta-miR-143 | -12.1 | 155 |
| bta-miR-143 | -12.0 | 218 |

|              |       |     |
|--------------|-------|-----|
| bta-miR-143  | -12.0 | 582 |
| bta-miR-143  | -11.9 | 609 |
| bta-miR-143  | -11.7 | 698 |
| bta-miR-143  | -11.7 | 434 |
| bta-miR-143  | -11.1 | 738 |
| bta-miR-143  | -10.8 | 293 |
| bta-miR-143  | -10.8 | 344 |
| bta-miR-143  | -10.0 | 50  |
| bta-miR-144  | -19.5 | 379 |
| bta-miR-144  | -17.8 | 203 |
| bta-miR-144  | -17.7 | 40  |
| bta-miR-144  | -17.6 | 517 |
| bta-miR-144  | -17.0 | 575 |
| bta-miR-144  | -16.8 | 1   |
| bta-miR-144  | -15.3 | 544 |
| bta-miR-144  | -14.7 | 80  |
| bta-miR-144  | -13.9 | 477 |
| bta-miR-144  | -13.4 | 632 |
| bta-miR-144  | -13.1 | 294 |
| bta-miR-144  | -12.9 | 411 |
| bta-miR-144  | -12.8 | 358 |
| bta-miR-144  | -12.2 | 106 |
| bta-miR-144  | -11.3 | 395 |
| bta-miR-144  | -11.3 | 19  |
| bta-miR-144  | -11.2 | 662 |
| bta-miR-144  | -10.9 | 172 |
| bta-miR-144  | -10.8 | 565 |
| bta-miR-144  | -10.7 | 267 |
| bta-miR-144  | -10.0 | 149 |
| bta-miR-146b | -24.9 | 165 |
| bta-miR-146b | -23.1 | 472 |
| bta-miR-146b | -21.4 | 602 |
| bta-miR-146b | -19.7 | 358 |
| bta-miR-146b | -19.1 | 424 |
| bta-miR-146b | -18.5 | 106 |
| bta-miR-146b | -17.9 | 261 |
| bta-miR-146b | -17.8 | 224 |
| bta-miR-146b | -16.9 | 560 |
| bta-miR-146b | -16.8 | 407 |
| bta-miR-146b | -16.7 | 72  |
| bta-miR-146b | -16.6 | 698 |
| bta-miR-146b | -16.2 | 29  |
| bta-miR-146b | -15.9 | 444 |
| bta-miR-146b | -15.8 | 653 |
| bta-miR-146b | -15.5 | 308 |
| bta-miR-146b | -14.8 | 516 |
| bta-miR-146b | -13.9 | 629 |
| bta-miR-146b | -13.4 | 10  |
| bta-miR-146b | -12.5 | 581 |
| bta-miR-146b | -11.4 | 198 |
| bta-miR-146b | -10.9 | 243 |
| bta-miR-146b | -10.1 | 215 |
| bta-miR-146a | -22.5 | 165 |
| bta-miR-146a | -20.7 | 472 |
| bta-miR-146a | -20.1 | 700 |
| bta-miR-146a | -19.3 | 366 |
| bta-miR-146a | -19.2 | 602 |
| bta-miR-146a | -18.1 | 261 |
| bta-miR-146a | -16.7 | 225 |

|              |       |     |
|--------------|-------|-----|
| bta-miR-146a | -16.6 | 424 |
| bta-miR-146a | -16.1 | 106 |
| bta-miR-146a | -15.2 | 654 |
| bta-miR-146a | -15.0 | 454 |
| bta-miR-146a | -14.6 | 560 |
| bta-miR-146a | -14.4 | 407 |
| bta-miR-146a | -14.3 | 509 |
| bta-miR-146a | -14.2 | 72  |
| bta-miR-146a | -13.9 | 629 |
| bta-miR-146a | -13.8 | 29  |
| bta-miR-146a | -13.7 | 308 |
| bta-miR-146a | -13.0 | 340 |
| bta-miR-146a | -12.7 | 581 |
| bta-miR-146a | -11.4 | 206 |
| bta-miR-146a | -11.2 | 523 |
| bta-miR-146a | -11.2 | 10  |
| bta-miR-147  | -23.4 | 198 |
| bta-miR-147  | -23.4 | 450 |
| bta-miR-147  | -21.2 | 171 |
| bta-miR-147  | -21.0 | 278 |
| bta-miR-147  | -20.5 | 64  |
| bta-miR-147  | -19.6 | 100 |
| bta-miR-147  | -19.6 | 482 |
| bta-miR-147  | -18.8 | 555 |
| bta-miR-147  | -18.6 | 407 |
| bta-miR-147  | -18.3 | 653 |
| bta-miR-147  | -17.6 | 617 |
| bta-miR-147  | -17.4 | 361 |
| bta-miR-147  | -16.6 | 12  |
| bta-miR-147  | -16.6 | 496 |
| bta-miR-147  | -15.8 | 125 |
| bta-miR-147  | -14.5 | 37  |
| bta-miR-147  | -14.3 | 265 |
| bta-miR-147  | -13.7 | 219 |
| bta-miR-147  | -13.6 | 586 |
| bta-miR-147  | -13.6 | 605 |
| bta-miR-147  | -12.4 | 698 |
| bta-miR-147  | -11.8 | 85  |
| bta-miR-147  | -11.8 | 238 |
| bta-miR-147  | -11.6 | 342 |
| bta-miR-147  | -11.2 | 471 |
| bta-miR-147  | -10.8 | 731 |
| bta-miR-147  | -10.6 | 154 |
| bta-miR-147  | -10.6 | 308 |
| bta-miR-152  | -24.0 | 572 |
| bta-miR-152  | -22.0 | 33  |
| bta-miR-152  | -20.7 | 5   |
| bta-miR-152  | -20.3 | 409 |
| bta-miR-152  | -19.8 | 362 |
| bta-miR-152  | -19.6 | 467 |
| bta-miR-152  | -19.5 | 77  |
| bta-miR-152  | -18.5 | 514 |
| bta-miR-152  | -17.8 | 247 |
| bta-miR-152  | -17.5 | 276 |
| bta-miR-152  | -17.0 | 539 |
| bta-miR-152  | -16.9 | 637 |
| bta-miR-152  | -16.5 | 384 |
| bta-miR-152  | -16.3 | 110 |
| bta-miR-152  | -15.7 | 163 |

|             |       |     |
|-------------|-------|-----|
| bta-miR-152 | -15.6 | 59  |
| bta-miR-152 | -14.8 | 596 |
| bta-miR-152 | -14.3 | 660 |
| bta-miR-152 | -13.9 | 135 |
| bta-miR-152 | -13.6 | 18  |
| bta-miR-152 | -13.4 | 330 |
| bta-miR-152 | -13.1 | 209 |
| bta-miR-152 | -11.8 | 552 |
| bta-miR-152 | -11.7 | 199 |
| bta-miR-152 | -11.5 | 740 |
| bta-miR-152 | -11.1 | 616 |
| bta-miR-152 | -10.3 | 691 |
| bta-miR-153 | -21.6 | 537 |
| bta-miR-153 | -19.2 | 4   |
| bta-miR-153 | -17.6 | 632 |
| bta-miR-153 | -17.4 | 54  |
| bta-miR-153 | -17.2 | 412 |
| bta-miR-153 | -15.4 | 354 |
| bta-miR-153 | -13.8 | 286 |
| bta-miR-153 | -13.7 | 258 |
| bta-miR-153 | -13.7 | 679 |
| bta-miR-153 | -13.5 | 489 |
| bta-miR-153 | -13.5 | 738 |
| bta-miR-153 | -13.3 | 520 |
| bta-miR-153 | -13.1 | 566 |
| bta-miR-153 | -12.9 | 147 |
| bta-miR-153 | -12.7 | 660 |
| bta-miR-153 | -11.9 | 77  |
| bta-miR-153 | -11.7 | 187 |
| bta-miR-153 | -11.4 | 589 |
| bta-miR-153 | -10.9 | 25  |
| bta-miR-153 | -10.6 | 702 |
| bta-miR-153 | -10.6 | 113 |
| bta-miR-154 | -30.9 | 620 |
| bta-miR-154 | -24.4 | 452 |
| bta-miR-154 | -24.0 | 479 |
| bta-miR-154 | -23.1 | 405 |
| bta-miR-154 | -22.8 | 69  |
| bta-miR-154 | -20.9 | 153 |
| bta-miR-154 | -20.5 | 560 |
| bta-miR-154 | -20.2 | 11  |
| bta-miR-154 | -20.1 | 114 |
| bta-miR-154 | -18.5 | 220 |
| bta-miR-154 | -17.7 | 698 |
| bta-miR-154 | -17.1 | 348 |
| bta-miR-154 | -16.7 | 591 |
| bta-miR-154 | -16.7 | 268 |
| bta-miR-154 | -13.2 | 38  |
| bta-miR-154 | -12.9 | 738 |
| bta-miR-154 | -12.2 | 372 |
| bta-miR-154 | -12.2 | 654 |
| bta-miR-154 | -12.1 | 445 |
| bta-miR-154 | -10.8 | 574 |
| bta-miR-154 | -10.8 | 294 |
| bta-miR-154 | -10.1 | 312 |
| bta-miR-155 | -20.8 | 361 |
| bta-miR-155 | -19.5 | 473 |
| bta-miR-155 | -19.5 | 162 |
| bta-miR-155 | -19.2 | 189 |

|              |       |     |
|--------------|-------|-----|
| bta-miR-155  | -19.1 | 30  |
| bta-miR-155  | -18.9 | 247 |
| bta-miR-155  | -18.2 | 579 |
| bta-miR-155  | -17.7 | 3   |
| bta-miR-155  | -17.7 | 636 |
| bta-miR-155  | -17.5 | 141 |
| bta-miR-155  | -17.1 | 698 |
| bta-miR-155  | -16.8 | 327 |
| bta-miR-155  | -16.2 | 400 |
| bta-miR-155  | -15.8 | 429 |
| bta-miR-155  | -15.4 | 109 |
| bta-miR-155  | -14.4 | 458 |
| bta-miR-155  | -14.4 | 210 |
| bta-miR-155  | -13.4 | 320 |
| bta-miR-155  | -13.3 | 510 |
| bta-miR-155  | -13.2 | 87  |
| bta-miR-155  | -12.9 | 283 |
| bta-miR-155  | -12.5 | 134 |
| bta-miR-155  | -11.9 | 341 |
| bta-miR-155  | -11.5 | 560 |
| bta-miR-155  | -11.3 | 624 |
| bta-miR-155  | -10.9 | 416 |
| bta-miR-155  | -10.8 | 381 |
| bta-miR-155  | -10.3 | 537 |
| bta-miR-16a  | -20.8 | 571 |
| bta-miR-16a  | -19.5 | 408 |
| bta-miR-16a  | -17.6 | 483 |
| bta-miR-16a  | -17.1 | 515 |
| bta-miR-16a  | -16.7 | 729 |
| bta-miR-16a  | -16.5 | 34  |
| bta-miR-16a  | -16.4 | 73  |
| bta-miR-16a  | -16.3 | 669 |
| bta-miR-16a  | -15.0 | 9   |
| bta-miR-16a  | -14.9 | 99  |
| bta-miR-16a  | -14.9 | 367 |
| bta-miR-16a  | -14.5 | 253 |
| bta-miR-16a  | -13.9 | 560 |
| bta-miR-16a  | -13.7 | 161 |
| bta-miR-16a  | -13.3 | 594 |
| bta-miR-16a  | -12.9 | 341 |
| bta-miR-16a  | -12.5 | 649 |
| bta-miR-16a  | -11.9 | 454 |
| bta-miR-16a  | -11.3 | 283 |
| bta-miR-16a  | -10.7 | 52  |
| bta-miR-16a  | -10.6 | 126 |
| bta-miR-181d | -22.2 | 324 |
| bta-miR-181d | -21.6 | 162 |
| bta-miR-181d | -21.5 | 361 |
| bta-miR-181d | -21.3 | 594 |
| bta-miR-181d | -20.9 | 473 |
| bta-miR-181d | -17.5 | 425 |
| bta-miR-181d | -17.2 | 208 |
| bta-miR-181d | -17.0 | 109 |
| bta-miR-181d | -16.9 | 397 |
| bta-miR-181d | -16.9 | 1   |
| bta-miR-181d | -16.9 | 341 |
| bta-miR-181d | -16.9 | 563 |
| bta-miR-181d | -16.8 | 510 |
| bta-miR-181d | -16.3 | 244 |



|              |       |     |
|--------------|-------|-----|
| bta-miR-181d | -15.8 | 30  |
| bta-miR-181d | -15.7 | 51  |
| bta-miR-181d | -15.1 | 185 |
| bta-miR-181d | -15.1 | 135 |
| bta-miR-181d | -14.0 | 624 |
| bta-miR-181d | -13.5 | 317 |
| bta-miR-181d | -13.2 | 702 |
| bta-miR-181d | -12.8 | 86  |
| bta-miR-181d | -11.6 | 586 |
| bta-miR-181d | -11.4 | 126 |
| bta-miR-181d | -11.1 | 308 |
| bta-miR-181d | -11.0 | 275 |
| bta-miR-181d | -11.0 | 458 |
| bta-miR-181d | -10.9 | 534 |
| bta-miR-181d | -10.1 | 666 |
| bta-miR-182  | -25.6 | 544 |
| bta-miR-182  | -24.7 | 659 |
| bta-miR-182  | -24.4 | 376 |
| bta-miR-182  | -22.9 | 113 |
| bta-miR-182  | -21.4 | 17  |
| bta-miR-182  | -20.9 | 81  |
| bta-miR-182  | -20.1 | 447 |
| bta-miR-182  | -19.3 | 613 |
| bta-miR-182  | -19.1 | 265 |
| bta-miR-182  | -18.9 | 496 |
| bta-miR-182  | -16.8 | 344 |
| bta-miR-182  | -16.5 | 584 |
| bta-miR-182  | -16.4 | 422 |
| bta-miR-182  | -16.2 | 231 |
| bta-miR-182  | -15.7 | 473 |
| bta-miR-182  | -14.6 | 691 |
| bta-miR-182  | -14.5 | 313 |
| bta-miR-182  | -14.0 | 730 |
| bta-miR-182  | -14.0 | 524 |
| bta-miR-182  | -12.7 | 1   |
| bta-miR-182  | -12.3 | 146 |
| bta-miR-182  | -11.9 | 162 |
| bta-miR-182  | -11.8 | 247 |
| bta-miR-182  | -11.5 | 51  |
| bta-miR-182  | -11.4 | 174 |
| bta-miR-182  | -11.0 | 59  |
| bta-miR-182  | -10.8 | 202 |
| bta-miR-183  | -26.3 | 495 |
| bta-miR-183  | -21.9 | 376 |
| bta-miR-183  | -21.6 | 447 |
| bta-miR-183  | -21.3 | 107 |
| bta-miR-183  | -19.6 | 632 |
| bta-miR-183  | -19.5 | 17  |
| bta-miR-183  | -19.2 | 80  |
| bta-miR-183  | -19.0 | 730 |
| bta-miR-183  | -18.8 | 575 |
| bta-miR-183  | -18.1 | 264 |
| bta-miR-183  | -18.0 | 544 |
| bta-miR-183  | -17.8 | 347 |
| bta-miR-183  | -17.7 | 313 |
| bta-miR-183  | -17.5 | 1   |
| bta-miR-183  | -17.1 | 228 |
| bta-miR-183  | -16.8 | 588 |
| bta-miR-183  | -15.7 | 473 |

|             |       |     |
|-------------|-------|-----|
| bta-miR-183 | -14.9 | 420 |
| bta-miR-183 | -14.7 | 686 |
| bta-miR-183 | -14.6 | 295 |
| bta-miR-183 | -14.2 | 59  |
| bta-miR-183 | -13.8 | 175 |
| bta-miR-183 | -13.7 | 145 |
| bta-miR-183 | -13.2 | 665 |
| bta-miR-183 | -13.0 | 607 |
| bta-miR-183 | -12.7 | 164 |
| bta-miR-183 | -12.1 | 51  |
| bta-miR-183 | -11.5 | 427 |
| bta-miR-183 | -10.6 | 709 |
| bta-miR-183 | -10.5 | 249 |
| bta-miR-183 | -10.2 | 200 |
| bta-miR-183 | -10.2 | 337 |
| bta-miR-183 | -10.0 | 327 |
| bta-miR-184 | -21.4 | 73  |
| bta-miR-184 | -21.3 | 247 |
| bta-miR-184 | -20.8 | 361 |
| bta-miR-184 | -20.6 | 510 |
| bta-miR-184 | -19.9 | 429 |
| bta-miR-184 | -19.8 | 540 |
| bta-miR-184 | -18.5 | 109 |
| bta-miR-184 | -18.2 | 30  |
| bta-miR-184 | -18.0 | 191 |
| bta-miR-184 | -17.9 | 571 |
| bta-miR-184 | -17.7 | 624 |
| bta-miR-184 | -17.1 | 401 |
| bta-miR-184 | -16.4 | 327 |
| bta-miR-184 | -16.1 | 483 |
| bta-miR-184 | -15.3 | 649 |
| bta-miR-184 | -15.3 | 126 |
| bta-miR-184 | -14.7 | 7   |
| bta-miR-184 | -14.7 | 698 |
| bta-miR-184 | -14.6 | 277 |
| bta-miR-184 | -13.3 | 96  |
| bta-miR-184 | -13.1 | 214 |
| bta-miR-184 | -12.6 | 54  |
| bta-miR-184 | -12.3 | 682 |
| bta-miR-184 | -12.0 | 167 |
| bta-miR-184 | -11.2 | 261 |
| bta-miR-184 | -11.2 | 475 |
| bta-miR-184 | -11.0 | 298 |
| bta-miR-185 | -26.7 | 277 |
| bta-miR-185 | -25.9 | 83  |
| bta-miR-185 | -22.7 | 107 |
| bta-miR-185 | -22.6 | 559 |
| bta-miR-185 | -22.1 | 450 |
| bta-miR-185 | -22.0 | 660 |
| bta-miR-185 | -20.7 | 176 |
| bta-miR-185 | -19.7 | 597 |
| bta-miR-185 | -19.7 | 238 |
| bta-miR-185 | -18.5 | 9   |
| bta-miR-185 | -18.4 | 369 |
| bta-miR-185 | -18.4 | 479 |
| bta-miR-185 | -18.1 | 299 |
| bta-miR-185 | -17.5 | 200 |
| bta-miR-185 | -17.4 | 67  |
| bta-miR-185 | -17.2 | 421 |

|             |       |     |
|-------------|-------|-----|
| bta-miR-185 | -15.9 | 710 |
| bta-miR-185 | -15.5 | 631 |
| bta-miR-185 | -14.0 | 685 |
| bta-miR-185 | -13.9 | 575 |
| bta-miR-185 | -13.2 | 410 |
| bta-miR-185 | -13.0 | 354 |
| bta-miR-185 | -12.8 | 51  |
| bta-miR-185 | -11.9 | 1   |
| bta-miR-185 | -11.7 | 738 |
| bta-miR-185 | -11.7 | 139 |
| bta-miR-185 | -11.7 | 154 |
| bta-miR-185 | -11.5 | 263 |
| bta-miR-185 | -11.1 | 519 |
| bta-miR-185 | -11.1 | 473 |
| bta-miR-185 | -10.7 | 37  |
| bta-miR-185 | -10.7 | 529 |
| bta-miR-185 | -10.5 | 219 |
| bta-miR-185 | -10.0 | 697 |
| bta-miR-187 | -25.9 | 115 |
| bta-miR-187 | -22.5 | 342 |
| bta-miR-187 | -22.3 | 462 |
| bta-miR-187 | -21.9 | 582 |
| bta-miR-187 | -21.6 | 61  |
| bta-miR-187 | -21.1 | 619 |
| bta-miR-187 | -20.5 | 402 |
| bta-miR-187 | -20.3 | 155 |
| bta-miR-187 | -19.1 | 12  |
| bta-miR-187 | -18.5 | 267 |
| bta-miR-187 | -18.4 | 560 |
| bta-miR-187 | -17.6 | 85  |
| bta-miR-187 | -17.1 | 740 |
| bta-miR-187 | -16.8 | 488 |
| bta-miR-187 | -16.7 | 362 |
| bta-miR-187 | -16.4 | 432 |
| bta-miR-187 | -16.1 | 185 |
| bta-miR-187 | -14.6 | 33  |
| bta-miR-187 | -13.3 | 696 |
| bta-miR-187 | -12.4 | 292 |
| bta-miR-187 | -12.0 | 643 |
| bta-miR-187 | -11.9 | 211 |
| bta-miR-187 | -11.8 | 662 |
| bta-miR-187 | -10.9 | 231 |
| bta-miR-188 | -31.3 | 162 |
| bta-miR-188 | -28.1 | 30  |
| bta-miR-188 | -26.0 | 578 |
| bta-miR-188 | -25.6 | 474 |
| bta-miR-188 | -25.2 | 398 |
| bta-miR-188 | -21.6 | 510 |
| bta-miR-188 | -21.5 | 244 |
| bta-miR-188 | -21.4 | 320 |
| bta-miR-188 | -21.2 | 109 |
| bta-miR-188 | -21.0 | 136 |
| bta-miR-188 | -21.0 | 425 |
| bta-miR-188 | -20.2 | 208 |
| bta-miR-188 | -18.8 | 1   |
| bta-miR-188 | -18.4 | 361 |
| bta-miR-188 | -17.7 | 624 |
| bta-miR-188 | -17.4 | 563 |
| bta-miR-188 | -17.0 | 637 |

|              |       |     |
|--------------|-------|-----|
| bta-miR-188  | -15.8 | 86  |
| bta-miR-188  | -15.1 | 692 |
| bta-miR-188  | -14.8 | 341 |
| bta-miR-188  | -13.6 | 185 |
| bta-miR-188  | -13.6 | 457 |
| bta-miR-188  | -13.2 | 536 |
| bta-miR-188  | -12.4 | 665 |
| bta-miR-188  | -12.3 | 715 |
| bta-miR-188  | -11.8 | 292 |
| bta-miR-188  | -11.1 | 309 |
| bta-miR-188  | -11.0 | 271 |
| bta-miR-188  | -10.5 | 20  |
| bta-miR-188  | -10.4 | 384 |
| bta-miR-188  | -10.2 | 73  |
| bta-miR-24   | -25.3 | 1   |
| bta-miR-24   | -24.4 | 256 |
| bta-miR-24   | -24.3 | 92  |
| bta-miR-24   | -22.7 | 403 |
| bta-miR-24   | -22.7 | 617 |
| bta-miR-24   | -21.8 | 39  |
| bta-miR-24   | -21.7 | 586 |
| bta-miR-24   | -18.9 | 172 |
| bta-miR-24   | -18.9 | 364 |
| bta-miR-24   | -18.4 | 477 |
| bta-miR-24   | -16.2 | 229 |
| bta-miR-24   | -16.1 | 560 |
| bta-miR-24   | -15.9 | 432 |
| bta-miR-24   | -14.3 | 739 |
| bta-miR-24   | -14.3 | 117 |
| bta-miR-24   | -13.2 | 80  |
| bta-miR-24   | -13.2 | 276 |
| bta-miR-24   | -13.2 | 536 |
| bta-miR-24   | -13.2 | 385 |
| bta-miR-24   | -13.1 | 643 |
| bta-miR-24   | -12.3 | 504 |
| bta-miR-24   | -12.2 | 144 |
| bta-miR-24   | -11.5 | 459 |
| bta-miR-24   | -11.4 | 292 |
| bta-miR-24   | -10.6 | 337 |
| bta-miR-24   | -10.0 | 165 |
| bta-miR-190a | -15.9 | 91  |
| bta-miR-190a | -15.7 | 34  |
| bta-miR-190a | -15.5 | 473 |
| bta-miR-190a | -14.5 | 261 |
| bta-miR-190a | -14.1 | 341 |
| bta-miR-190a | -13.6 | 367 |
| bta-miR-190a | -13.1 | 13  |
| bta-miR-190a | -13.0 | 298 |
| bta-miR-190a | -12.9 | 520 |
| bta-miR-190a | -12.0 | 595 |
| bta-miR-190a | -11.8 | 111 |
| bta-miR-190a | -11.0 | 192 |
| bta-miR-190a | -10.9 | 639 |
| bta-miR-190a | -10.7 | 431 |
| bta-miR-190a | -10.6 | 563 |
| bta-miR-190a | -10.4 | 402 |
| bta-miR-190a | -10.2 | 544 |
| bta-miR-190b | -19.4 | 29  |
| bta-miR-190b | -17.0 | 262 |

|              |       |     |
|--------------|-------|-----|
| bta-miR-190b | -16.6 | 91  |
| bta-miR-190b | -15.7 | 472 |
| bta-miR-190b | -15.5 | 330 |
| bta-miR-190b | -15.4 | 243 |
| bta-miR-190b | -15.4 | 12  |
| bta-miR-190b | -14.7 | 142 |
| bta-miR-190b | -14.6 | 166 |
| bta-miR-190b | -14.3 | 596 |
| bta-miR-190b | -14.3 | 119 |
| bta-miR-190b | -13.9 | 361 |
| bta-miR-190b | -13.0 | 406 |
| bta-miR-190b | -12.7 | 429 |
| bta-miR-190b | -12.7 | 514 |
| bta-miR-190b | -12.0 | 297 |
| bta-miR-190b | -12.0 | 188 |
| bta-miR-190b | -11.7 | 572 |
| bta-miR-190b | -11.3 | 639 |
| bta-miR-190b | -10.9 | 108 |
| bta-miR-190b | -10.3 | 135 |
| bta-miR-190b | -10.3 | 324 |
| bta-miR-190b | -10.1 | 460 |
| bta-miR-193b | -29.8 | 65  |
| bta-miR-193b | -28.0 | 11  |
| bta-miR-193b | -26.8 | 405 |
| bta-miR-193b | -26.7 | 604 |
| bta-miR-193b | -24.8 | 445 |
| bta-miR-193b | -22.8 | 108 |
| bta-miR-193b | -22.3 | 265 |
| bta-miR-193b | -21.6 | 496 |
| bta-miR-193b | -19.6 | 652 |
| bta-miR-193b | -18.2 | 357 |
| bta-miR-193b | -17.2 | 203 |
| bta-miR-193b | -15.9 | 171 |
| bta-miR-193b | -14.6 | 520 |
| bta-miR-193b | -14.4 | 557 |
| bta-miR-193b | -13.9 | 41  |
| bta-miR-193b | -13.1 | 597 |
| bta-miR-193b | -12.5 | 541 |
| bta-miR-193b | -12.2 | 738 |
| bta-miR-193b | -11.7 | 155 |
| bta-miR-193b | -11.3 | 96  |
| bta-miR-193b | -11.2 | 241 |
| bta-miR-193b | -10.7 | 698 |
| bta-miR-193b | -10.0 | 388 |
| bta-miR-194  | -19.5 | 467 |
| bta-miR-194  | -18.7 | 409 |
| bta-miR-194  | -18.3 | 606 |
| bta-miR-194  | -18.1 | 431 |
| bta-miR-194  | -17.9 | 60  |
| bta-miR-194  | -17.3 | 228 |
| bta-miR-194  | -17.3 | 90  |
| bta-miR-194  | -17.2 | 363 |
| bta-miR-194  | -17.1 | 572 |
| bta-miR-194  | -16.8 | 22  |
| bta-miR-194  | -16.1 | 169 |
| bta-miR-194  | -16.0 | 655 |
| bta-miR-194  | -14.4 | 739 |
| bta-miR-194  | -13.7 | 214 |
| bta-miR-194  | -13.3 | 146 |

|              |       |     |
|--------------|-------|-----|
| bta-miR-194  | -13.3 | 514 |
| bta-miR-194  | -12.9 | 543 |
| bta-miR-194  | -12.8 | 594 |
| bta-miR-194  | -12.5 | 353 |
| bta-miR-194  | -12.2 | 280 |
| bta-miR-194  | -12.0 | 5   |
| bta-miR-194  | -11.6 | 325 |
| bta-miR-194  | -11.0 | 191 |
| bta-miR-194  | -11.0 | 497 |
| bta-miR-194  | -11.0 | 317 |
| bta-miR-194  | -10.6 | 704 |
| bta-miR-194  | -10.4 | 560 |
| bta-miR-194  | -10.2 | 136 |
| bta-miR-194  | -10.2 | 696 |
| bta-miR-194  | -10.1 | 401 |
| bta-miR-196a | -22.5 | 98  |
| bta-miR-196a | -21.8 | 168 |
| bta-miR-196a | -21.1 | 342 |
| bta-miR-196a | -20.0 | 60  |
| bta-miR-196a | -19.0 | 142 |
| bta-miR-196a | -18.8 | 409 |
| bta-miR-196a | -16.8 | 484 |
| bta-miR-196a | -16.5 | 596 |
| bta-miR-196a | -16.5 | 650 |
| bta-miR-196a | -15.9 | 430 |
| bta-miR-196a | -15.8 | 260 |
| bta-miR-196a | -15.4 | 555 |
| bta-miR-196a | -15.2 | 192 |
| bta-miR-196a | -15.1 | 33  |
| bta-miR-196a | -15.0 | 9   |
| bta-miR-196a | -14.7 | 330 |
| bta-miR-196a | -14.5 | 699 |
| bta-miR-196a | -14.2 | 299 |
| bta-miR-196a | -13.8 | 514 |
| bta-miR-196a | -13.7 | 272 |
| bta-miR-196a | -13.0 | 734 |
| bta-miR-196a | -12.9 | 372 |
| bta-miR-196a | -12.5 | 572 |
| bta-miR-196a | -12.1 | 236 |
| bta-miR-196a | -11.1 | 462 |
| bta-miR-196a | -10.9 | 123 |
| bta-miR-196a | -10.4 | 215 |
| bta-miR-196b | -26.4 | 168 |
| bta-miR-196b | -25.2 | 98  |
| bta-miR-196b | -23.9 | 59  |
| bta-miR-196b | -22.0 | 401 |
| bta-miR-196b | -22.0 | 259 |
| bta-miR-196b | -21.4 | 596 |
| bta-miR-196b | -20.8 | 430 |
| bta-miR-196b | -20.6 | 191 |
| bta-miR-196b | -20.0 | 142 |
| bta-miR-196b | -19.4 | 484 |
| bta-miR-196b | -19.2 | 330 |
| bta-miR-196b | -18.3 | 567 |
| bta-miR-196b | -18.0 | 715 |
| bta-miR-196b | -16.6 | 33  |
| bta-miR-196b | -15.8 | 650 |
| bta-miR-196b | -14.8 | 5   |
| bta-miR-196b | -14.1 | 372 |

|              |       |     |
|--------------|-------|-----|
| bta-miR-196b | -13.9 | 214 |
| bta-miR-196b | -13.7 | 466 |
| bta-miR-196b | -13.5 | 558 |
| bta-miR-196b | -12.9 | 631 |
| bta-miR-196b | -12.8 | 513 |
| bta-miR-196b | -11.7 | 681 |
| bta-miR-196b | -11.4 | 299 |
| bta-miR-196b | -11.4 | 133 |
| bta-miR-196b | -10.8 | 324 |
| bta-miR-197  | -31.3 | 616 |
| bta-miR-197  | -27.7 | 420 |
| bta-miR-197  | -26.7 | 13  |
| bta-miR-197  | -20.0 | 477 |
| bta-miR-197  | -18.7 | 66  |
| bta-miR-197  | -18.0 | 586 |
| bta-miR-197  | -17.4 | 216 |
| bta-miR-197  | -15.7 | 364 |
| bta-miR-197  | -14.4 | 266 |
| bta-miR-197  | -13.0 | 560 |
| bta-miR-197  | -12.8 | 344 |
| bta-miR-197  | -12.7 | 112 |
| bta-miR-197  | -12.2 | 504 |
| bta-miR-197  | -11.9 | 405 |
| bta-miR-197  | -11.5 | 174 |
| bta-miR-197  | -11.4 | 657 |
| bta-miR-197  | -10.1 | 185 |
| bta-miR-197  | -10.1 | 84  |
| bta-miR-197  | -10.1 | 740 |
| bta-miR-202  | -21.7 | 612 |
| bta-miR-202  | -17.6 | 11  |
| bta-miR-202  | -16.2 | 442 |
| bta-miR-202  | -15.7 | 479 |
| bta-miR-202  | -15.3 | 68  |
| bta-miR-202  | -14.9 | 265 |
| bta-miR-202  | -14.3 | 172 |
| bta-miR-202  | -14.0 | 349 |
| bta-miR-202  | -14.0 | 405 |
| bta-miR-202  | -13.5 | 574 |
| bta-miR-202  | -13.2 | 377 |
| bta-miR-202  | -13.2 | 196 |
| bta-miR-202  | -11.9 | 517 |
| bta-miR-202  | -11.5 | 735 |
| bta-miR-202  | -11.4 | 304 |
| bta-miR-202  | -10.5 | 652 |
| bta-miR-202  | -10.4 | 543 |
| bta-miR-202  | -10.2 | 223 |
| bta-miR-206  | -20.0 | 381 |
| bta-miR-206  | -19.8 | 52  |
| bta-miR-206  | -19.7 | 185 |
| bta-miR-206  | -19.5 | 120 |
| bta-miR-206  | -18.7 | 299 |
| bta-miR-206  | -18.5 | 484 |
| bta-miR-206  | -18.2 | 84  |
| bta-miR-206  | -17.0 | 457 |
| bta-miR-206  | -15.3 | 636 |
| bta-miR-206  | -15.1 | 5   |
| bta-miR-206  | -15.1 | 277 |
| bta-miR-206  | -15.0 | 670 |
| bta-miR-206  | -14.8 | 237 |

|              |       |     |
|--------------|-------|-----|
| bta-miR-206  | -14.6 | 564 |
| bta-miR-206  | -14.3 | 698 |
| bta-miR-206  | -14.0 | 415 |
| bta-miR-206  | -13.6 | 363 |
| bta-miR-206  | -13.2 | 160 |
| bta-miR-206  | -11.1 | 321 |
| bta-miR-206  | -10.8 | 528 |
| bta-miR-206  | -10.1 | 69  |
| bta-miR-206  | -10.1 | 602 |
| bta-miR-208a | -18.9 | 558 |
| bta-miR-208a | -18.3 | 516 |
| bta-miR-208a | -18.2 | 281 |
| bta-miR-208a | -18.0 | 10  |
| bta-miR-208a | -17.8 | 485 |
| bta-miR-208a | -17.7 | 66  |
| bta-miR-208a | -17.5 | 373 |
| bta-miR-208a | -16.0 | 651 |
| bta-miR-208a | -15.3 | 406 |
| bta-miR-208a | -15.0 | 694 |
| bta-miR-208a | -14.9 | 242 |
| bta-miR-208a | -14.6 | 736 |
| bta-miR-208a | -14.4 | 616 |
| bta-miR-208a | -14.3 | 455 |
| bta-miR-208a | -14.1 | 35  |
| bta-miR-208a | -13.6 | 197 |
| bta-miR-208a | -13.6 | 546 |
| bta-miR-208a | -13.5 | 122 |
| bta-miR-208a | -12.6 | 602 |
| bta-miR-208a | -12.1 | 573 |
| bta-miR-208a | -11.6 | 172 |
| bta-miR-208a | -11.5 | 2   |
| bta-miR-208a | -11.5 | 423 |
| bta-miR-208a | -11.3 | 307 |
| bta-miR-208a | -11.3 | 106 |
| bta-miR-208a | -11.2 | 631 |
| bta-miR-208a | -10.9 | 669 |
| bta-miR-208a | -10.2 | 154 |
| bta-miR-208b | -19.3 | 508 |
| bta-miR-208b | -17.8 | 271 |
| bta-miR-208b | -16.2 | 242 |
| bta-miR-208b | -14.7 | 381 |
| bta-miR-208b | -14.4 | 651 |
| bta-miR-208b | -14.1 | 28  |
| bta-miR-208b | -13.8 | 122 |
| bta-miR-208b | -13.7 | 556 |
| bta-miR-208b | -13.7 | 681 |
| bta-miR-208b | -13.6 | 636 |
| bta-miR-208b | -13.3 | 485 |
| bta-miR-208b | -13.0 | 66  |
| bta-miR-208b | -12.9 | 422 |
| bta-miR-208b | -12.8 | 339 |
| bta-miR-208b | -12.5 | 602 |
| bta-miR-208b | -12.5 | 2   |
| bta-miR-208b | -11.9 | 406 |
| bta-miR-208b | -11.9 | 455 |
| bta-miR-208b | -10.9 | 106 |
| bta-miR-208b | -10.8 | 471 |
| bta-miR-208b | -10.7 | 698 |
| bta-miR-208b | -10.7 | 10  |



|              |       |     |
|--------------|-------|-----|
| bta-miR-208b | -10.4 | 737 |
| bta-miR-208b | -10.3 | 361 |
| bta-miR-208b | -10.2 | 49  |
| bta-miR-208b | -10.1 | 570 |
| bta-miR-211  | -24.1 | 605 |
| bta-miR-211  | -22.4 | 586 |
| bta-miR-211  | -20.9 | 66  |
| bta-miR-211  | -20.7 | 419 |
| bta-miR-211  | -19.9 | 206 |
| bta-miR-211  | -19.7 | 494 |
| bta-miR-211  | -18.8 | 172 |
| bta-miR-211  | -17.7 | 12  |
| bta-miR-211  | -16.0 | 555 |
| bta-miR-211  | -15.0 | 270 |
| bta-miR-211  | -14.0 | 464 |
| bta-miR-211  | -12.4 | 86  |
| bta-miR-211  | -11.7 | 344 |
| bta-miR-211  | -11.4 | 35  |
| bta-miR-211  | -11.3 | 654 |
| bta-miR-211  | -10.9 | 405 |
| bta-miR-211  | -10.8 | 199 |
| bta-miR-211  | -10.6 | 723 |
| bta-miR-211  | -10.3 | 452 |
| bta-miR-212  | -25.3 | 604 |
| bta-miR-212  | -25.2 | 558 |
| bta-miR-212  | -24.6 | 464 |
| bta-miR-212  | -22.4 | 651 |
| bta-miR-212  | -22.1 | 419 |
| bta-miR-212  | -21.8 | 197 |
| bta-miR-212  | -21.7 | 63  |
| bta-miR-212  | -21.4 | 376 |
| bta-miR-212  | -21.2 | 17  |
| bta-miR-212  | -21.1 | 232 |
| bta-miR-212  | -19.9 | 265 |
| bta-miR-212  | -19.0 | 494 |
| bta-miR-212  | -18.0 | 113 |
| bta-miR-212  | -17.6 | 154 |
| bta-miR-212  | -15.7 | 85  |
| bta-miR-212  | -14.9 | 454 |
| bta-miR-212  | -14.7 | 347 |
| bta-miR-212  | -14.7 | 44  |
| bta-miR-212  | -14.2 | 4   |
| bta-miR-212  | -14.0 | 737 |
| bta-miR-212  | -13.4 | 624 |
| bta-miR-212  | -12.7 | 687 |
| bta-miR-212  | -12.5 | 527 |
| bta-miR-212  | -11.8 | 586 |
| bta-miR-212  | -10.9 | 222 |
| bta-miR-212  | -10.6 | 514 |
| bta-miR-216a | -24.9 | 421 |
| bta-miR-216a | -21.4 | 66  |
| bta-miR-216a | -20.4 | 476 |
| bta-miR-216a | -20.3 | 161 |
| bta-miR-216a | -19.3 | 7   |
| bta-miR-216a | -19.3 | 573 |
| bta-miR-216a | -18.9 | 112 |
| bta-miR-216a | -17.8 | 559 |
| bta-miR-216a | -17.3 | 199 |
| bta-miR-216a | -17.3 | 606 |

|              |       |     |
|--------------|-------|-----|
| bta-miR-216a | -16.7 | 408 |
| bta-miR-216a | -16.2 | 22  |
| bta-miR-216a | -16.2 | 263 |
| bta-miR-216a | -16.0 | 354 |
| bta-miR-216a | -15.4 | 739 |
| bta-miR-216a | -15.1 | 534 |
| bta-miR-216a | -14.9 | 182 |
| bta-miR-216a | -14.7 | 342 |
| bta-miR-216a | -14.5 | 514 |
| bta-miR-216a | -14.3 | 382 |
| bta-miR-216a | -14.3 | 232 |
| bta-miR-216a | -14.2 | 663 |
| bta-miR-216a | -13.9 | 299 |
| bta-miR-216a | -13.7 | 461 |
| bta-miR-216a | -13.4 | 696 |
| bta-miR-216a | -12.5 | 445 |
| bta-miR-216a | -12.4 | 147 |
| bta-miR-216a | -11.8 | 45  |
| bta-miR-216a | -11.3 | 96  |
| bta-miR-216a | -11.3 | 643 |
| bta-miR-216a | -11.0 | 326 |
| bta-miR-216b | -22.6 | 416 |
| bta-miR-216b | -21.6 | 55  |
| bta-miR-216b | -20.6 | 488 |
| bta-miR-216b | -19.1 | 587 |
| bta-miR-216b | -19.1 | 185 |
| bta-miR-216b | -18.9 | 2   |
| bta-miR-216b | -18.8 | 161 |
| bta-miR-216b | -18.0 | 353 |
| bta-miR-216b | -17.1 | 206 |
| bta-miR-216b | -16.7 | 473 |
| bta-miR-216b | -15.9 | 112 |
| bta-miR-216b | -15.5 | 299 |
| bta-miR-216b | -15.3 | 235 |
| bta-miR-216b | -14.9 | 147 |
| bta-miR-216b | -14.5 | 551 |
| bta-miR-216b | -14.2 | 23  |
| bta-miR-216b | -13.6 | 88  |
| bta-miR-216b | -13.6 | 616 |
| bta-miR-216b | -13.6 | 663 |
| bta-miR-216b | -13.2 | 534 |
| bta-miR-216b | -13.1 | 373 |
| bta-miR-216b | -12.6 | 257 |
| bta-miR-216b | -12.4 | 692 |
| bta-miR-216b | -12.3 | 445 |
| bta-miR-216b | -12.2 | 73  |
| bta-miR-216b | -11.8 | 740 |
| bta-miR-216b | -11.7 | 514 |
| bta-miR-216b | -11.6 | 408 |
| bta-miR-216b | -10.9 | 271 |
| bta-miR-216b | -10.9 | 344 |
| bta-miR-216b | -10.7 | 581 |
| bta-miR-216b | -10.3 | 483 |
| bta-miR-216b | -10.2 | 383 |
| bta-miR-217  | -28.5 | 391 |
| bta-miR-217  | -24.0 | 460 |
| bta-miR-217  | -23.2 | 80  |
| bta-miR-217  | -22.2 | 572 |
| bta-miR-217  | -21.2 | 4   |

|                |       |     |
|----------------|-------|-----|
| bta-miR-217    | -19.5 | 52  |
| bta-miR-217    | -18.7 | 235 |
| bta-miR-217    | -17.9 | 670 |
| bta-miR-217    | -17.8 | 342 |
| bta-miR-217    | -17.6 | 511 |
| bta-miR-217    | -17.2 | 596 |
| bta-miR-217    | -16.9 | 169 |
| bta-miR-217    | -16.0 | 107 |
| bta-miR-217    | -15.9 | 208 |
| bta-miR-217    | -14.9 | 416 |
| bta-miR-217    | -14.6 | 34  |
| bta-miR-217    | -14.4 | 623 |
| bta-miR-217    | -13.2 | 532 |
| bta-miR-217    | -13.1 | 715 |
| bta-miR-217    | -13.0 | 650 |
| bta-miR-217    | -12.8 | 272 |
| bta-miR-217    | -11.5 | 499 |
| bta-miR-217    | -11.1 | 691 |
| bta-miR-217    | -11.0 | 136 |
| bta-miR-217    | -10.8 | 298 |
| bta-miR-217    | -10.2 | 120 |
| bta-miR-219-5p | -19.8 | 609 |
| bta-miR-219-5p | -17.5 | 350 |
| bta-miR-219-5p | -16.7 | 405 |
| bta-miR-219-5p | -15.6 | 240 |
| bta-miR-219-5p | -15.5 | 652 |
| bta-miR-219-5p | -15.4 | 486 |
| bta-miR-219-5p | -14.9 | 434 |
| bta-miR-219-5p | -14.0 | 66  |
| bta-miR-219-5p | -13.9 | 696 |
| bta-miR-219-5p | -13.8 | 101 |
| bta-miR-219-5p | -13.8 | 172 |
| bta-miR-219-5p | -13.6 | 25  |
| bta-miR-219-5p | -13.4 | 81  |
| bta-miR-219-5p | -12.5 | 218 |
| bta-miR-219-5p | -11.8 | 736 |
| bta-miR-219-5p | -11.4 | 574 |
| bta-miR-219-5p | -11.2 | 506 |
| bta-miR-219-5p | -11.2 | 1   |
| bta-miR-219-5p | -11.1 | 422 |
| bta-miR-219-5p | -11.1 | 545 |
| bta-miR-219-5p | -10.8 | 377 |
| bta-miR-219-5p | -10.5 | 338 |
| bta-miR-219-5p | -10.5 | 473 |
| bta-miR-219-5p | -10.5 | 628 |
| bta-miR-219-3p | -25.8 | 41  |
| bta-miR-219-3p | -24.0 | 94  |
| bta-miR-219-3p | -19.1 | 164 |
| bta-miR-219-3p | -18.5 | 232 |
| bta-miR-219-3p | -18.2 | 113 |
| bta-miR-219-3p | -17.9 | 554 |
| bta-miR-219-3p | -17.9 | 16  |
| bta-miR-219-3p | -17.8 | 454 |
| bta-miR-219-3p | -17.4 | 418 |
| bta-miR-219-3p | -17.3 | 479 |
| bta-miR-219-3p | -16.9 | 664 |
| bta-miR-219-3p | -16.8 | 128 |
| bta-miR-219-3p | -16.8 | 589 |
| bta-miR-219-3p | -16.0 | 359 |

|                |       |     |
|----------------|-------|-----|
| bta-miR-219-3p | -16.0 | 395 |
| bta-miR-219-3p | -15.8 | 256 |
| bta-miR-219-3p | -15.7 | 616 |
| bta-miR-219-3p | -15.1 | 507 |
| bta-miR-219-3p | -14.7 | 313 |
| bta-miR-219-3p | -14.5 | 1   |
| bta-miR-219-3p | -14.5 | 278 |
| bta-miR-219-3p | -14.2 | 183 |
| bta-miR-219-3p | -14.0 | 374 |
| bta-miR-219-3p | -13.9 | 575 |
| bta-miR-219-3p | -12.6 | 737 |
| bta-miR-219-3p | -12.3 | 84  |
| bta-miR-219-3p | -11.7 | 710 |
| bta-miR-219-3p | -11.2 | 644 |
| bta-miR-219-3p | -11.0 | 472 |
| bta-miR-219-3p | -10.7 | 342 |
| bta-miR-219-3p | -10.6 | 155 |
| bta-miR-219-3p | -10.5 | 525 |
| bta-miR-219-3p | -10.3 | 67  |
| bta-miR-223    | -23.9 | 615 |
| bta-miR-223    | -23.3 | 69  |
| bta-miR-223    | -19.4 | 174 |
| bta-miR-223    | -18.8 | 478 |
| bta-miR-223    | -18.1 | 448 |
| bta-miR-223    | -17.6 | 16  |
| bta-miR-223    | -17.0 | 344 |
| bta-miR-223    | -16.7 | 113 |
| bta-miR-223    | -16.2 | 267 |
| bta-miR-223    | -15.3 | 545 |
| bta-miR-223    | -15.3 | 417 |
| bta-miR-223    | -14.3 | 730 |
| bta-miR-223    | -14.1 | 576 |
| bta-miR-223    | -14.0 | 598 |
| bta-miR-223    | -13.3 | 372 |
| bta-miR-223    | -12.2 | 660 |
| bta-miR-223    | -11.8 | 505 |
| bta-miR-223    | -11.0 | 221 |
| bta-miR-223    | -10.5 | 41  |
| bta-miR-223    | -10.5 | 364 |
| bta-miR-223    | -10.3 | 199 |
| bta-miR-223    | -10.3 | 568 |
| bta-miR-223    | -10.1 | 1   |
| bta-miR-224    | -26.2 | 617 |
| bta-miR-224    | -21.4 | 480 |
| bta-miR-224    | -21.0 | 507 |
| bta-miR-224    | -20.0 | 113 |
| bta-miR-224    | -19.5 | 174 |
| bta-miR-224    | -19.0 | 228 |
| bta-miR-224    | -18.9 | 404 |
| bta-miR-224    | -18.8 | 726 |
| bta-miR-224    | -18.4 | 11  |
| bta-miR-224    | -18.1 | 70  |
| bta-miR-224    | -17.5 | 576 |
| bta-miR-224    | -17.4 | 334 |
| bta-miR-224    | -16.8 | 454 |
| bta-miR-224    | -16.2 | 422 |
| bta-miR-224    | -15.4 | 265 |
| bta-miR-224    | -15.3 | 599 |
| bta-miR-224    | -14.6 | 49  |

|             |       |     |
|-------------|-------|-----|
| bta-miR-224 | -14.2 | 537 |
| bta-miR-224 | -13.7 | 34  |
| bta-miR-224 | -13.7 | 370 |
| bta-miR-224 | -13.6 | 558 |
| bta-miR-224 | -12.4 | 662 |
| bta-miR-224 | -12.1 | 197 |
| bta-miR-224 | -11.4 | 147 |
| bta-miR-224 | -10.9 | 136 |
| bta-miR-224 | -10.8 | 709 |
| bta-miR-224 | -10.5 | 313 |
| bta-miR-224 | -10.0 | 445 |
| bta-miR-28  | -26.5 | 262 |
| bta-miR-28  | -22.9 | 14  |
| bta-miR-28  | -22.6 | 495 |
| bta-miR-28  | -22.5 | 607 |
| bta-miR-28  | -22.0 | 410 |
| bta-miR-28  | -20.2 | 67  |
| bta-miR-28  | -18.7 | 229 |
| bta-miR-28  | -18.4 | 346 |
| bta-miR-28  | -18.3 | 737 |
| bta-miR-28  | -18.0 | 449 |
| bta-miR-28  | -17.6 | 193 |
| bta-miR-28  | -17.5 | 107 |
| bta-miR-28  | -16.8 | 370 |
| bta-miR-28  | -16.1 | 567 |
| bta-miR-28  | -15.8 | 469 |
| bta-miR-28  | -15.8 | 653 |
| bta-miR-28  | -15.6 | 629 |
| bta-miR-28  | -15.5 | 516 |
| bta-miR-28  | -15.0 | 150 |
| bta-miR-28  | -14.2 | 542 |
| bta-miR-28  | -14.1 | 703 |
| bta-miR-28  | -13.1 | 302 |
| bta-miR-28  | -12.4 | 35  |
| bta-miR-28  | -12.3 | 586 |
| bta-miR-28  | -11.4 | 173 |
| bta-miR-28  | -11.3 | 393 |
| bta-miR-28  | -11.3 | 433 |
| bta-miR-28  | -11.2 | 1   |
| bta-miR-28  | -11.0 | 554 |
| bta-miR-28  | -10.6 | 93  |
| bta-miR-28  | -10.1 | 212 |
| bta-miR-296 | -28.7 | 451 |
| bta-miR-296 | -28.6 | 557 |
| bta-miR-296 | -28.3 | 153 |
| bta-miR-296 | -28.2 | 240 |
| bta-miR-296 | -26.7 | 102 |
| bta-miR-296 | -24.3 | 414 |
| bta-miR-296 | -24.1 | 313 |
| bta-miR-296 | -23.2 | 348 |
| bta-miR-296 | -22.6 | 394 |
| bta-miR-296 | -22.4 | 479 |
| bta-miR-296 | -22.1 | 574 |
| bta-miR-296 | -21.5 | 177 |
| bta-miR-296 | -21.5 | 69  |
| bta-miR-296 | -21.2 | 28  |
| bta-miR-296 | -20.7 | 129 |
| bta-miR-296 | -19.1 | 280 |
| bta-miR-296 | -18.7 | 620 |

|             |       |     |
|-------------|-------|-----|
| bta-miR-296 | -16.6 | 663 |
| bta-miR-296 | -16.1 | 3   |
| bta-miR-296 | -16.1 | 693 |
| bta-miR-296 | -14.8 | 371 |
| bta-miR-296 | -13.9 | 220 |
| bta-miR-296 | -13.5 | 517 |
| bta-miR-296 | -13.1 | 58  |
| bta-miR-296 | -12.5 | 735 |
| bta-miR-296 | -12.2 | 91  |
| bta-miR-296 | -11.7 | 710 |
| bta-miR-296 | -11.0 | 599 |
| bta-miR-296 | -10.8 | 610 |
| bta-miR-296 | -10.8 | 642 |
| bta-miR-296 | -10.8 | 271 |
| bta-miR-296 | -10.7 | 342 |
| bta-miR-296 | -10.4 | 652 |
| bta-miR-296 | -10.3 | 682 |
| bta-miR-299 | -21.7 | 81  |
| bta-miR-299 | -20.6 | 412 |
| bta-miR-299 | -20.1 | 614 |
| bta-miR-299 | -20.0 | 266 |
| bta-miR-299 | -19.1 | 7   |
| bta-miR-299 | -18.7 | 450 |
| bta-miR-299 | -18.2 | 497 |
| bta-miR-299 | -17.6 | 658 |
| bta-miR-299 | -16.8 | 543 |
| bta-miR-299 | -16.5 | 113 |
| bta-miR-299 | -16.0 | 62  |
| bta-miR-299 | -15.6 | 478 |
| bta-miR-299 | -15.5 | 583 |
| bta-miR-299 | -14.7 | 176 |
| bta-miR-299 | -14.2 | 598 |
| bta-miR-299 | -13.9 | 229 |
| bta-miR-299 | -13.8 | 40  |
| bta-miR-299 | -13.2 | 738 |
| bta-miR-299 | -13.2 | 359 |
| bta-miR-299 | -10.4 | 339 |
| bta-miR-299 | -10.0 | 570 |
| bta-miR-29d | -19.9 | 72  |
| bta-miR-29d | -19.2 | 1   |
| bta-miR-29d | -16.3 | 435 |
| bta-miR-29d | -16.1 | 27  |
| bta-miR-29d | -15.8 | 463 |
| bta-miR-29d | -15.2 | 93  |
| bta-miR-29d | -15.1 | 709 |
| bta-miR-29d | -15.0 | 404 |
| bta-miR-29d | -14.6 | 617 |
| bta-miR-29d | -14.5 | 374 |
| bta-miR-29d | -14.1 | 346 |
| bta-miR-29d | -14.0 | 576 |
| bta-miR-29d | -13.9 | 263 |
| bta-miR-29d | -13.1 | 496 |
| bta-miR-29d | -13.1 | 223 |
| bta-miR-29d | -11.9 | 146 |
| bta-miR-29d | -11.8 | 529 |
| bta-miR-29d | -11.1 | 173 |
| bta-miR-29d | -11.0 | 656 |
| bta-miR-29d | -10.6 | 672 |
| bta-miR-29d | -10.6 | 311 |

|              |       |     |
|--------------|-------|-----|
| bta-miR-29d  | -10.5 | 277 |
| bta-miR-29d  | -10.3 | 589 |
| bta-miR-301a | -22.8 | 518 |
| bta-miR-301a | -21.8 | 408 |
| bta-miR-301a | -21.3 | 359 |
| bta-miR-301a | -20.2 | 560 |
| bta-miR-301a | -17.3 | 624 |
| bta-miR-301a | -17.2 | 664 |
| bta-miR-301a | -17.1 | 3   |
| bta-miR-301a | -16.8 | 473 |
| bta-miR-301a | -15.9 | 73  |
| bta-miR-301a | -15.6 | 116 |
| bta-miR-301a | -15.4 | 167 |
| bta-miR-301a | -14.9 | 539 |
| bta-miR-301a | -14.5 | 266 |
| bta-miR-301a | -14.4 | 589 |
| bta-miR-301a | -13.8 | 730 |
| bta-miR-301a | -13.2 | 51  |
| bta-miR-301a | -13.0 | 293 |
| bta-miR-301a | -11.7 | 188 |
| bta-miR-301a | -11.5 | 693 |
| bta-miR-301a | -11.2 | 344 |
| bta-miR-301a | -10.7 | 149 |
| bta-miR-301a | -10.5 | 452 |
| bta-miR-301b | -21.9 | 518 |
| bta-miR-301b | -21.8 | 560 |
| bta-miR-301b | -20.6 | 359 |
| bta-miR-301b | -17.8 | 624 |
| bta-miR-301b | -17.0 | 539 |
| bta-miR-301b | -17.0 | 664 |
| bta-miR-301b | -16.8 | 473 |
| bta-miR-301b | -16.6 | 266 |
| bta-miR-301b | -16.1 | 408 |
| bta-miR-301b | -15.9 | 167 |
| bta-miR-301b | -15.9 | 73  |
| bta-miR-301b | -15.5 | 20  |
| bta-miR-301b | -15.2 | 290 |
| bta-miR-301b | -14.1 | 1   |
| bta-miR-301b | -14.0 | 116 |
| bta-miR-301b | -13.3 | 589 |
| bta-miR-301b | -12.8 | 244 |
| bta-miR-301b | -12.3 | 738 |
| bta-miR-301b | -11.7 | 188 |
| bta-miR-301b | -11.3 | 697 |
| bta-miR-301b | -11.2 | 344 |
| bta-miR-301b | -10.3 | 144 |
| bta-miR-301b | -10.3 | 429 |
| bta-miR-302a | -22.0 | 55  |
| bta-miR-302a | -21.2 | 594 |
| bta-miR-302a | -20.8 | 401 |
| bta-miR-302a | -19.5 | 5   |
| bta-miR-302a | -18.6 | 191 |
| bta-miR-302a | -18.1 | 263 |
| bta-miR-302a | -17.7 | 457 |
| bta-miR-302a | -17.4 | 489 |
| bta-miR-302a | -17.1 | 361 |
| bta-miR-302a | -15.6 | 225 |
| bta-miR-302a | -15.0 | 156 |
| bta-miR-302a | -14.9 | 81  |

|              |       |     |
|--------------|-------|-----|
| bta-miR-302a | -14.8 | 100 |
| bta-miR-302a | -14.8 | 736 |
| bta-miR-302a | -14.3 | 552 |
| bta-miR-302a | -14.2 | 649 |
| bta-miR-302a | -14.1 | 332 |
| bta-miR-302a | -14.0 | 437 |
| bta-miR-302a | -13.3 | 696 |
| bta-miR-302a | -11.5 | 299 |
| bta-miR-302a | -11.3 | 629 |
| bta-miR-302a | -11.3 | 422 |
| bta-miR-302d | -22.1 | 613 |
| bta-miR-302d | -19.6 | 403 |
| bta-miR-302d | -19.6 | 586 |
| bta-miR-302d | -19.5 | 61  |
| bta-miR-302d | -18.1 | 13  |
| bta-miR-302d | -17.9 | 194 |
| bta-miR-302d | -17.8 | 470 |
| bta-miR-302d | -16.7 | 350 |
| bta-miR-302d | -16.7 | 437 |
| bta-miR-302d | -16.5 | 225 |
| bta-miR-302d | -16.0 | 366 |
| bta-miR-302d | -15.0 | 497 |
| bta-miR-302d | -14.9 | 81  |
| bta-miR-302d | -14.8 | 736 |
| bta-miR-302d | -14.7 | 103 |
| bta-miR-302d | -14.5 | 156 |
| bta-miR-302d | -14.3 | 267 |
| bta-miR-302d | -13.5 | 649 |
| bta-miR-302d | -12.5 | 698 |
| bta-miR-302d | -11.3 | 422 |
| bta-miR-302d | -10.5 | 630 |
| bta-miR-302d | -10.3 | 36  |
| bta-miR-302d | -10.1 | 556 |
| bta-miR-302b | -22.6 | 594 |
| bta-miR-302b | -20.3 | 58  |
| bta-miR-302b | -19.6 | 403 |
| bta-miR-302b | -18.8 | 13  |
| bta-miR-302b | -18.2 | 360 |
| bta-miR-302b | -17.9 | 194 |
| bta-miR-302b | -17.9 | 457 |
| bta-miR-302b | -16.5 | 225 |
| bta-miR-302b | -15.2 | 156 |
| bta-miR-302b | -15.0 | 497 |
| bta-miR-302b | -14.9 | 81  |
| bta-miR-302b | -14.8 | 736 |
| bta-miR-302b | -14.7 | 103 |
| bta-miR-302b | -14.7 | 265 |
| bta-miR-302b | -14.3 | 697 |
| bta-miR-302b | -14.2 | 649 |
| bta-miR-302b | -14.0 | 437 |
| bta-miR-302b | -13.8 | 553 |
| bta-miR-302b | -13.2 | 337 |
| bta-miR-302b | -11.3 | 422 |
| bta-miR-302b | -10.5 | 630 |
| bta-miR-302b | -10.3 | 36  |
| bta-miR-302c | -24.1 | 594 |
| bta-miR-302c | -22.1 | 58  |
| bta-miR-302c | -22.1 | 401 |
| bta-miR-302c | -20.9 | 13  |



|              |       |     |
|--------------|-------|-----|
| bta-miR-302c | -20.1 | 263 |
| bta-miR-302c | -19.4 | 474 |
| bta-miR-302c | -19.2 | 495 |
| bta-miR-302c | -19.0 | 431 |
| bta-miR-302c | -19.0 | 362 |
| bta-miR-302c | -18.9 | 185 |
| bta-miR-302c | -18.8 | 222 |
| bta-miR-302c | -18.5 | 331 |
| bta-miR-302c | -17.2 | 564 |
| bta-miR-302c | -15.4 | 655 |
| bta-miR-302c | -15.2 | 86  |
| bta-miR-302c | -14.1 | 136 |
| bta-miR-302c | -13.9 | 730 |
| bta-miR-302c | -13.0 | 535 |
| bta-miR-302c | -12.4 | 164 |
| bta-miR-302c | -12.1 | 698 |
| bta-miR-302c | -11.9 | 34  |
| bta-miR-302c | -10.6 | 299 |
| bta-miR-302c | -10.5 | 630 |
| bta-miR-30f  | -25.4 | 610 |
| bta-miR-30f  | -25.3 | 435 |
| bta-miR-30f  | -23.4 | 65  |
| bta-miR-30f  | -22.7 | 12  |
| bta-miR-30f  | -18.9 | 403 |
| bta-miR-30f  | -17.3 | 520 |
| bta-miR-30f  | -17.0 | 198 |
| bta-miR-30f  | -17.0 | 346 |
| bta-miR-30f  | -16.8 | 450 |
| bta-miR-30f  | -16.0 | 653 |
| bta-miR-30f  | -15.8 | 586 |
| bta-miR-30f  | -15.3 | 234 |
| bta-miR-30f  | -14.7 | 539 |
| bta-miR-30f  | -14.1 | 171 |
| bta-miR-30f  | -13.0 | 496 |
| bta-miR-30f  | -12.9 | 184 |
| bta-miR-30f  | -12.3 | 221 |
| bta-miR-30f  | -11.9 | 559 |
| bta-miR-30f  | -11.8 | 280 |
| bta-miR-30f  | -11.8 | 92  |
| bta-miR-32   | -21.3 | 359 |
| bta-miR-32   | -18.9 | 562 |
| bta-miR-32   | -18.5 | 473 |
| bta-miR-32   | -18.3 | 7   |
| bta-miR-32   | -18.0 | 644 |
| bta-miR-32   | -16.6 | 81  |
| bta-miR-32   | -16.0 | 256 |
| bta-miR-32   | -15.8 | 525 |
| bta-miR-32   | -15.1 | 624 |
| bta-miR-32   | -14.4 | 35  |
| bta-miR-32   | -13.6 | 499 |
| bta-miR-32   | -13.4 | 412 |
| bta-miR-32   | -13.4 | 668 |
| bta-miR-32   | -12.7 | 697 |
| bta-miR-32   | -12.4 | 177 |
| bta-miR-32   | -11.9 | 283 |
| bta-miR-32   | -11.7 | 548 |
| bta-miR-32   | -11.5 | 729 |
| bta-miR-32   | -11.3 | 454 |
| bta-miR-32   | -11.2 | 388 |

|             |       |     |
|-------------|-------|-----|
| bta-miR-32  | -11.1 | 225 |
| bta-miR-32  | -11.0 | 606 |
| bta-miR-32  | -10.9 | 428 |
| bta-miR-32  | -10.3 | 107 |
| bta-miR-323 | -23.1 | 575 |
| bta-miR-323 | -23.1 | 357 |
| bta-miR-323 | -22.1 | 8   |
| bta-miR-323 | -19.1 | 630 |
| bta-miR-323 | -18.5 | 68  |
| bta-miR-323 | -17.7 | 448 |
| bta-miR-323 | -17.1 | 506 |
| bta-miR-323 | -16.6 | 411 |
| bta-miR-323 | -15.8 | 532 |
| bta-miR-323 | -15.3 | 239 |
| bta-miR-323 | -15.1 | 598 |
| bta-miR-323 | -14.8 | 738 |
| bta-miR-323 | -14.3 | 479 |
| bta-miR-323 | -13.8 | 174 |
| bta-miR-323 | -13.8 | 218 |
| bta-miR-323 | -13.2 | 663 |
| bta-miR-323 | -13.1 | 28  |
| bta-miR-323 | -12.6 | 563 |
| bta-miR-323 | -12.2 | 341 |
| bta-miR-323 | -12.0 | 101 |
| bta-miR-323 | -11.6 | 280 |
| bta-miR-323 | -11.4 | 434 |
| bta-miR-323 | -11.0 | 497 |
| bta-miR-323 | -10.3 | 266 |
| bta-miR-323 | -10.0 | 1   |
| bta-miR-324 | -30.5 | 408 |
| bta-miR-324 | -30.0 | 468 |
| bta-miR-324 | -29.3 | 593 |
| bta-miR-324 | -29.2 | 353 |
| bta-miR-324 | -26.1 | 160 |
| bta-miR-324 | -24.4 | 99  |
| bta-miR-324 | -23.0 | 253 |
| bta-miR-324 | -22.6 | 64  |
| bta-miR-324 | -22.3 | 22  |
| bta-miR-324 | -21.4 | 624 |
| bta-miR-324 | -21.3 | 492 |
| bta-miR-324 | -19.3 | 563 |
| bta-miR-324 | -17.7 | 383 |
| bta-miR-324 | -17.5 | 3   |
| bta-miR-324 | -16.1 | 649 |
| bta-miR-324 | -15.6 | 297 |
| bta-miR-324 | -15.2 | 206 |
| bta-miR-324 | -15.0 | 234 |
| bta-miR-324 | -14.7 | 126 |
| bta-miR-324 | -14.3 | 319 |
| bta-miR-324 | -13.4 | 326 |
| bta-miR-324 | -12.9 | 693 |
| bta-miR-324 | -12.5 | 728 |
| bta-miR-324 | -12.1 | 137 |
| bta-miR-324 | -12.1 | 529 |
| bta-miR-324 | -11.1 | 272 |
| bta-miR-324 | -10.3 | 45  |
| bta-miR-324 | -10.3 | 189 |
| bta-miR-324 | -10.2 | 148 |
| bta-miR-326 | -32.3 | 614 |

|              |       |     |
|--------------|-------|-----|
| bta-miR-326  | -29.1 | 220 |
| bta-miR-326  | -27.1 | 413 |
| bta-miR-326  | -26.8 | 448 |
| bta-miR-326  | -25.1 | 69  |
| bta-miR-326  | -20.6 | 347 |
| bta-miR-326  | -20.1 | 153 |
| bta-miR-326  | -19.5 | 498 |
| bta-miR-326  | -18.9 | 6   |
| bta-miR-326  | -17.4 | 265 |
| bta-miR-326  | -17.3 | 582 |
| bta-miR-326  | -16.9 | 114 |
| bta-miR-326  | -15.0 | 177 |
| bta-miR-326  | -13.4 | 658 |
| bta-miR-326  | -12.6 | 40  |
| bta-miR-326  | -11.8 | 308 |
| bta-miR-326  | -11.8 | 244 |
| bta-miR-326  | -11.6 | 30  |
| bta-miR-326  | -11.4 | 740 |
| bta-miR-326  | -11.0 | 109 |
| bta-miR-326  | -10.6 | 576 |
| bta-miR-326  | -10.3 | 330 |
| bta-miR-326  | -10.1 | 142 |
| bta-miR-326  | -10.1 | 709 |
| bta-miR-326  | -10.0 | 135 |
| bta-miR-326  | -10.0 | 324 |
| bta-miR-326  | -10.0 | 33  |
| bta-miR-328  | -33.5 | 610 |
| bta-miR-328  | -30.4 | 450 |
| bta-miR-328  | -27.9 | 413 |
| bta-miR-328  | -24.8 | 69  |
| bta-miR-328  | -22.9 | 230 |
| bta-miR-328  | -20.9 | 268 |
| bta-miR-328  | -20.7 | 114 |
| bta-miR-328  | -20.0 | 199 |
| bta-miR-328  | -19.7 | 12  |
| bta-miR-328  | -17.9 | 498 |
| bta-miR-328  | -17.4 | 166 |
| bta-miR-328  | -16.3 | 576 |
| bta-miR-328  | -14.9 | 630 |
| bta-miR-328  | -14.5 | 343 |
| bta-miR-328  | -14.5 | 654 |
| bta-miR-328  | -14.1 | 218 |
| bta-miR-328  | -13.6 | 440 |
| bta-miR-328  | -13.5 | 370 |
| bta-miR-328  | -12.5 | 41  |
| bta-miR-328  | -12.2 | 728 |
| bta-miR-328  | -11.7 | 155 |
| bta-miR-328  | -11.6 | 92  |
| bta-miR-328  | -11.4 | 555 |
| bta-miR-328  | -10.0 | 405 |
| bta-miR-329a | -21.8 | 612 |
| bta-miR-329a | -20.7 | 12  |
| bta-miR-329a | -17.4 | 645 |
| bta-miR-329a | -17.1 | 365 |
| bta-miR-329a | -16.8 | 445 |
| bta-miR-329a | -16.7 | 506 |
| bta-miR-329a | -16.0 | 268 |
| bta-miR-329a | -15.9 | 405 |
| bta-miR-329a | -15.9 | 574 |

|              |       |     |
|--------------|-------|-----|
| bta-miR-329a | -15.5 | 68  |
| bta-miR-329a | -14.1 | 26  |
| bta-miR-329a | -13.7 | 663 |
| bta-miR-329a | -13.2 | 544 |
| bta-miR-329a | -13.0 | 125 |
| bta-miR-329a | -12.8 | 226 |
| bta-miR-329a | -12.8 | 174 |
| bta-miR-329a | -12.7 | 153 |
| bta-miR-329a | -12.6 | 479 |
| bta-miR-329a | -12.1 | 114 |
| bta-miR-329a | -11.4 | 423 |
| bta-miR-329a | -11.3 | 737 |
| bta-miR-329a | -10.6 | 604 |
| bta-miR-329a | -10.3 | 340 |
| bta-miR-329a | -10.2 | 50  |
| bta-miR-329a | -10.0 | 243 |
| bta-miR-329a | -10.0 | 557 |
| bta-miR-329b | -25.6 | 452 |
| bta-miR-329b | -24.9 | 220 |
| bta-miR-329b | -24.1 | 265 |
| bta-miR-329b | -23.9 | 494 |
| bta-miR-329b | -22.5 | 616 |
| bta-miR-329b | -21.7 | 197 |
| bta-miR-329b | -21.7 | 351 |
| bta-miR-329b | -21.4 | 100 |
| bta-miR-329b | -19.2 | 410 |
| bta-miR-329b | -18.8 | 46  |
| bta-miR-329b | -18.6 | 159 |
| bta-miR-329b | -18.5 | 597 |
| bta-miR-329b | -16.0 | 330 |
| bta-miR-329b | -15.9 | 128 |
| bta-miR-329b | -15.8 | 303 |
| bta-miR-329b | -15.5 | 514 |
| bta-miR-329b | -15.4 | 558 |
| bta-miR-329b | -15.0 | 701 |
| bta-miR-329b | -14.4 | 11  |
| bta-miR-329b | -14.0 | 479 |
| bta-miR-329b | -13.6 | 79  |
| bta-miR-329b | -13.5 | 429 |
| bta-miR-329b | -13.0 | 731 |
| bta-miR-329b | -12.6 | 383 |
| bta-miR-329b | -12.5 | 652 |
| bta-miR-329b | -12.4 | 247 |
| bta-miR-329b | -10.9 | 184 |
| bta-miR-329b | -10.7 | 439 |
| bta-miR-329b | -10.7 | 320 |
| bta-miR-329b | -10.5 | 33  |
| bta-miR-329b | -10.3 | 142 |
| bta-miR-329b | -10.2 | 401 |
| bta-miR-330  | -31.5 | 5   |
| bta-miR-330  | -31.3 | 475 |
| bta-miR-330  | -26.1 | 396 |
| bta-miR-330  | -25.7 | 567 |
| bta-miR-330  | -24.2 | 650 |
| bta-miR-330  | -23.5 | 59  |
| bta-miR-330  | -22.6 | 502 |
| bta-miR-330  | -21.6 | 364 |
| bta-miR-330  | -20.6 | 537 |
| bta-miR-330  | -20.0 | 606 |

|             |       |     |
|-------------|-------|-----|
| bta-miR-330 | -17.6 | 262 |
| bta-miR-330 | -16.3 | 90  |
| bta-miR-330 | -14.4 | 146 |
| bta-miR-330 | -14.1 | 683 |
| bta-miR-330 | -13.8 | 214 |
| bta-miR-330 | -13.7 | 432 |
| bta-miR-330 | -13.4 | 730 |
| bta-miR-330 | -13.0 | 30  |
| bta-miR-330 | -12.9 | 345 |
| bta-miR-330 | -12.2 | 190 |
| bta-miR-330 | -12.0 | 231 |
| bta-miR-330 | -11.1 | 630 |
| bta-miR-330 | -11.0 | 386 |
| bta-miR-330 | -10.9 | 289 |
| bta-miR-330 | -10.6 | 123 |
| bta-miR-330 | -10.6 | 560 |
| bta-miR-335 | -19.3 | 606 |
| bta-miR-335 | -17.0 | 488 |
| bta-miR-335 | -15.6 | 540 |
| bta-miR-335 | -14.6 | 522 |
| bta-miR-335 | -14.6 | 654 |
| bta-miR-335 | -14.0 | 683 |
| bta-miR-335 | -13.5 | 288 |
| bta-miR-335 | -13.3 | 578 |
| bta-miR-335 | -12.7 | 250 |
| bta-miR-335 | -12.2 | 73  |
| bta-miR-335 | -12.1 | 383 |
| bta-miR-335 | -12.1 | 743 |
| bta-miR-335 | -11.6 | 18  |
| bta-miR-335 | -10.9 | 641 |
| bta-miR-335 | -10.8 | 343 |
| bta-miR-335 | -10.2 | 2   |
| bta-miR-335 | -10.1 | 428 |
| bta-miR-338 | -22.9 | 407 |
| bta-miR-338 | -21.9 | 573 |
| bta-miR-338 | -20.2 | 85  |
| bta-miR-338 | -19.8 | 1   |
| bta-miR-338 | -19.0 | 352 |
| bta-miR-338 | -18.1 | 732 |
| bta-miR-338 | -18.0 | 45  |
| bta-miR-338 | -17.2 | 170 |
| bta-miR-338 | -17.1 | 607 |
| bta-miR-338 | -16.2 | 198 |
| bta-miR-338 | -16.0 | 253 |
| bta-miR-338 | -15.9 | 646 |
| bta-miR-338 | -15.9 | 487 |
| bta-miR-338 | -13.7 | 432 |
| bta-miR-338 | -13.7 | 541 |
| bta-miR-338 | -12.9 | 560 |
| bta-miR-338 | -12.9 | 448 |
| bta-miR-338 | -12.8 | 469 |
| bta-miR-338 | -12.5 | 140 |
| bta-miR-338 | -11.7 | 688 |
| bta-miR-338 | -11.6 | 373 |
| bta-miR-338 | -11.5 | 298 |
| bta-miR-338 | -11.2 | 23  |
| bta-miR-338 | -11.1 | 516 |
| bta-miR-338 | -10.0 | 116 |
| bta-miR-339 | -30.2 | 622 |

|             |       |     |
|-------------|-------|-----|
| bta-miR-339 | -28.4 | 583 |
| bta-miR-339 | -28.3 | 472 |
| bta-miR-339 | -27.1 | 417 |
| bta-miR-339 | -26.8 | 204 |
| bta-miR-339 | -24.0 | 356 |
| bta-miR-339 | -23.2 | 26  |
| bta-miR-339 | -21.4 | 242 |
| bta-miR-339 | -19.5 | 84  |
| bta-miR-339 | -18.8 | 108 |
| bta-miR-339 | -18.1 | 166 |
| bta-miR-339 | -17.1 | 1   |
| bta-miR-339 | -17.1 | 394 |
| bta-miR-339 | -17.0 | 281 |
| bta-miR-339 | -16.4 | 559 |
| bta-miR-339 | -15.1 | 455 |
| bta-miR-339 | -14.7 | 187 |
| bta-miR-339 | -14.0 | 502 |
| bta-miR-339 | -12.9 | 337 |
| bta-miR-339 | -12.8 | 614 |
| bta-miR-339 | -12.2 | 377 |
| bta-miR-339 | -12.0 | 711 |
| bta-miR-339 | -11.9 | 465 |
| bta-miR-339 | -11.5 | 130 |
| bta-miR-339 | -11.2 | 659 |
| bta-miR-339 | -11.1 | 139 |
| bta-miR-339 | -11.1 | 72  |
| bta-miR-339 | -10.9 | 313 |
| bta-miR-339 | -10.9 | 518 |
| bta-miR-33a | -20.6 | 358 |
| bta-miR-33a | -19.7 | 483 |
| bta-miR-33a | -18.2 | 17  |
| bta-miR-33a | -17.0 | 66  |
| bta-miR-33a | -16.8 | 654 |
| bta-miR-33a | -16.6 | 408 |
| bta-miR-33a | -15.8 | 516 |
| bta-miR-33a | -15.7 | 251 |
| bta-miR-33a | -15.5 | 585 |
| bta-miR-33a | -15.3 | 109 |
| bta-miR-33a | -14.8 | 538 |
| bta-miR-33a | -14.7 | 172 |
| bta-miR-33a | -13.7 | 624 |
| bta-miR-33a | -13.6 | 686 |
| bta-miR-33a | -13.4 | 728 |
| bta-miR-33a | -12.6 | 41  |
| bta-miR-33a | -12.5 | 271 |
| bta-miR-33a | -12.4 | 450 |
| bta-miR-33a | -11.8 | 560 |
| bta-miR-33a | -10.0 | 3   |
| bta-miR-33b | -19.6 | 358 |
| bta-miR-33b | -19.1 | 254 |
| bta-miR-33b | -18.9 | 94  |
| bta-miR-33b | -18.4 | 7   |
| bta-miR-33b | -18.3 | 485 |
| bta-miR-33b | -18.0 | 62  |
| bta-miR-33b | -15.9 | 516 |
| bta-miR-33b | -15.9 | 654 |
| bta-miR-33b | -15.4 | 41  |
| bta-miR-33b | -14.5 | 167 |
| bta-miR-33b | -14.4 | 606 |

|                |       |     |
|----------------|-------|-----|
| bta-miR-33b    | -14.1 | 199 |
| bta-miR-33b    | -13.9 | 410 |
| bta-miR-33b    | -13.8 | 554 |
| bta-miR-33b    | -12.9 | 686 |
| bta-miR-33b    | -12.5 | 728 |
| bta-miR-33b    | -12.3 | 118 |
| bta-miR-33b    | -12.2 | 80  |
| bta-miR-33b    | -11.2 | 229 |
| bta-miR-33b    | -10.8 | 566 |
| bta-miR-33b    | -10.7 | 633 |
| bta-miR-33b    | -10.5 | 451 |
| bta-miR-33b    | -10.4 | 278 |
| bta-miR-33b    | -10.2 | 589 |
| bta-miR-33b    | -10.1 | 335 |
| bta-miR-340    | -22.7 | 605 |
| bta-miR-340    | -22.2 | 408 |
| bta-miR-340    | -21.7 | 72  |
| bta-miR-340    | -19.0 | 464 |
| bta-miR-340    | -18.9 | 623 |
| bta-miR-340    | -18.3 | 429 |
| bta-miR-340    | -18.2 | 12  |
| bta-miR-340    | -17.2 | 216 |
| bta-miR-340    | -17.1 | 576 |
| bta-miR-340    | -16.5 | 155 |
| bta-miR-340    | -15.7 | 252 |
| bta-miR-340    | -15.6 | 357 |
| bta-miR-340    | -15.0 | 548 |
| bta-miR-340    | -13.8 | 115 |
| bta-miR-340    | -13.1 | 733 |
| bta-miR-340    | -13.1 | 185 |
| bta-miR-340    | -13.0 | 645 |
| bta-miR-340    | -13.0 | 350 |
| bta-miR-340    | -12.5 | 450 |
| bta-miR-340    | -12.1 | 685 |
| bta-miR-340    | -10.4 | 504 |
| bta-miR-340    | -10.0 | 274 |
| bta-miR-346    | -33.7 | 614 |
| bta-miR-346    | -26.6 | 411 |
| bta-miR-346    | -26.1 | 69  |
| bta-miR-346    | -25.7 | 479 |
| bta-miR-346    | -24.6 | 16  |
| bta-miR-346    | -22.1 | 575 |
| bta-miR-346    | -21.3 | 447 |
| bta-miR-346    | -20.7 | 239 |
| bta-miR-346    | -20.3 | 109 |
| bta-miR-346    | -18.7 | 349 |
| bta-miR-346    | -17.6 | 174 |
| bta-miR-346    | -16.4 | 654 |
| bta-miR-346    | -14.0 | 218 |
| bta-miR-346    | -13.4 | 548 |
| bta-miR-346    | -13.1 | 506 |
| bta-miR-346    | -12.1 | 377 |
| bta-miR-346    | -12.1 | 737 |
| bta-miR-346    | -11.7 | 278 |
| bta-miR-346    | -11.6 | 8   |
| bta-miR-346    | -11.2 | 154 |
| bta-miR-346    | -10.7 | 38  |
| bta-miR-362-5p | -24.2 | 567 |
| bta-miR-362-5p | -23.4 | 473 |

|                |       |     |
|----------------|-------|-----|
| bta-miR-362-5p | -22.8 | 156 |
| bta-miR-362-5p | -21.9 | 189 |
| bta-miR-362-5p | -21.6 | 51  |
| bta-miR-362-5p | -20.9 | 361 |
| bta-miR-362-5p | -19.9 | 109 |
| bta-miR-362-5p | -19.8 | 382 |
| bta-miR-362-5p | -19.3 | 416 |
| bta-miR-362-5p | -19.3 | 9   |
| bta-miR-362-5p | -19.1 | 457 |
| bta-miR-362-5p | -19.1 | 603 |
| bta-miR-362-5p | -18.5 | 73  |
| bta-miR-362-5p | -17.9 | 492 |
| bta-miR-362-5p | -17.1 | 262 |
| bta-miR-362-5p | -16.6 | 305 |
| bta-miR-362-5p | -16.6 | 649 |
| bta-miR-362-5p | -14.6 | 698 |
| bta-miR-362-5p | -14.1 | 510 |
| bta-miR-362-5p | -13.6 | 145 |
| bta-miR-362-5p | -13.5 | 232 |
| bta-miR-362-5p | -12.8 | 397 |
| bta-miR-362-5p | -12.4 | 341 |
| bta-miR-362-5p | -12.1 | 131 |
| bta-miR-362-5p | -12.1 | 324 |
| bta-miR-362-5p | -11.8 | 737 |
| bta-miR-362-5p | -10.7 | 533 |
| bta-miR-362-5p | -10.3 | 98  |
| bta-miR-362-3p | -19.7 | 4   |
| bta-miR-362-3p | -15.8 | 357 |
| bta-miR-362-3p | -15.6 | 626 |
| bta-miR-362-3p | -15.1 | 499 |
| bta-miR-362-3p | -14.9 | 248 |
| bta-miR-362-3p | -14.6 | 611 |
| bta-miR-362-3p | -14.5 | 537 |
| bta-miR-362-3p | -14.5 | 401 |
| bta-miR-362-3p | -13.6 | 28  |
| bta-miR-362-3p | -13.3 | 596 |
| bta-miR-362-3p | -13.1 | 208 |
| bta-miR-362-3p | -12.9 | 715 |
| bta-miR-362-3p | -12.6 | 70  |
| bta-miR-362-3p | -12.5 | 564 |
| bta-miR-362-3p | -12.4 | 430 |
| bta-miR-362-3p | -12.0 | 233 |
| bta-miR-362-3p | -11.5 | 97  |
| bta-miR-362-3p | -11.2 | 659 |
| bta-miR-362-3p | -10.9 | 474 |
| bta-miR-362-3p | -10.4 | 188 |
| bta-miR-362-3p | -10.3 | 309 |
| bta-miR-367    | -20.9 | 5   |
| bta-miR-367    | -19.9 | 515 |
| bta-miR-367    | -17.9 | 408 |
| bta-miR-367    | -17.5 | 55  |
| bta-miR-367    | -17.4 | 341 |
| bta-miR-367    | -17.0 | 578 |
| bta-miR-367    | -16.9 | 367 |
| bta-miR-367    | -16.8 | 636 |
| bta-miR-367    | -16.7 | 147 |
| bta-miR-367    | -16.7 | 473 |
| bta-miR-367    | -16.6 | 535 |
| bta-miR-367    | -16.3 | 244 |



|             |       |     |
|-------------|-------|-----|
| bta-miR-367 | -15.2 | 667 |
| bta-miR-367 | -14.3 | 30  |
| bta-miR-367 | -13.5 | 190 |
| bta-miR-367 | -13.3 | 739 |
| bta-miR-367 | -13.0 | 457 |
| bta-miR-367 | -12.9 | 109 |
| bta-miR-367 | -12.5 | 693 |
| bta-miR-367 | -12.3 | 296 |
| bta-miR-367 | -12.3 | 554 |
| bta-miR-367 | -12.1 | 429 |
| bta-miR-367 | -11.7 | 86  |
| bta-miR-367 | -11.1 | 615 |
| bta-miR-367 | -11.1 | 210 |
| bta-miR-367 | -10.9 | 231 |
| bta-miR-370 | -31.9 | 457 |
| bta-miR-370 | -29.4 | 571 |
| bta-miR-370 | -29.0 | 149 |
| bta-miR-370 | -28.9 | 13  |
| bta-miR-370 | -26.7 | 415 |
| bta-miR-370 | -25.8 | 51  |
| bta-miR-370 | -25.8 | 237 |
| bta-miR-370 | -24.7 | 83  |
| bta-miR-370 | -24.7 | 308 |
| bta-miR-370 | -23.5 | 126 |
| bta-miR-370 | -21.2 | 504 |
| bta-miR-370 | -19.9 | 616 |
| bta-miR-370 | -18.9 | 182 |
| bta-miR-370 | -18.4 | 660 |
| bta-miR-370 | -17.8 | 367 |
| bta-miR-370 | -17.2 | 392 |
| bta-miR-370 | -16.1 | 209 |
| bta-miR-370 | -15.2 | 277 |
| bta-miR-370 | -14.3 | 484 |
| bta-miR-370 | -14.2 | 328 |
| bta-miR-370 | -14.0 | 543 |
| bta-miR-370 | -13.4 | 341 |
| bta-miR-370 | -13.3 | 739 |
| bta-miR-370 | -13.1 | 636 |
| bta-miR-370 | -11.1 | 71  |
| bta-miR-370 | -10.7 | 702 |
| bta-miR-370 | -10.6 | 120 |
| bta-miR-370 | -10.6 | 607 |
| bta-miR-370 | -10.2 | 680 |
| bta-miR-370 | -10.0 | 289 |
| bta-miR-370 | -10.0 | 384 |
| bta-miR-292 | -23.1 | 606 |
| bta-miR-292 | -22.3 | 6   |
| bta-miR-292 | -22.0 | 56  |
| bta-miR-292 | -21.1 | 86  |
| bta-miR-292 | -21.0 | 469 |
| bta-miR-292 | -20.6 | 394 |
| bta-miR-292 | -20.0 | 262 |
| bta-miR-292 | -18.4 | 189 |
| bta-miR-292 | -17.8 | 137 |
| bta-miR-292 | -17.8 | 643 |
| bta-miR-292 | -17.8 | 367 |
| bta-miR-292 | -17.3 | 435 |
| bta-miR-292 | -16.7 | 350 |
| bta-miR-292 | -15.8 | 736 |

|              |       |     |
|--------------|-------|-----|
| bta-miR-292  | -15.7 | 488 |
| bta-miR-292  | -15.2 | 30  |
| bta-miR-292  | -13.8 | 629 |
| bta-miR-292  | -13.7 | 225 |
| bta-miR-292  | -13.6 | 586 |
| bta-miR-292  | -13.5 | 275 |
| bta-miR-292  | -13.1 | 299 |
| bta-miR-292  | -12.2 | 529 |
| bta-miR-292  | -12.0 | 505 |
| bta-miR-292  | -11.9 | 424 |
| bta-miR-292  | -11.6 | 702 |
| bta-miR-292  | -11.5 | 556 |
| bta-miR-292  | -10.2 | 167 |
| bta-miR-292  | -10.0 | 326 |
| bta-miR-374b | -20.3 | 56  |
| bta-miR-374b | -17.0 | 649 |
| bta-miR-374b | -16.6 | 605 |
| bta-miR-374b | -15.1 | 12  |
| bta-miR-374b | -14.9 | 415 |
| bta-miR-374b | -13.7 | 520 |
| bta-miR-374b | -13.4 | 537 |
| bta-miR-374b | -13.4 | 80  |
| bta-miR-374b | -12.8 | 262 |
| bta-miR-374b | -12.7 | 737 |
| bta-miR-374b | -12.7 | 167 |
| bta-miR-374b | -12.4 | 180 |
| bta-miR-374b | -12.4 | 489 |
| bta-miR-374b | -12.2 | 193 |
| bta-miR-374b | -11.9 | 560 |
| bta-miR-374b | -11.5 | 23  |
| bta-miR-374b | -11.3 | 442 |
| bta-miR-374b | -11.2 | 275 |
| bta-miR-374b | -11.2 | 623 |
| bta-miR-374b | -10.9 | 456 |
| bta-miR-374b | -10.7 | 367 |
| bta-miR-374b | -10.6 | 472 |
| bta-miR-374b | -10.6 | 108 |
| bta-miR-374b | -10.4 | 702 |
| bta-miR-374b | -10.3 | 425 |
| bta-miR-375  | -24.5 | 23  |
| bta-miR-375  | -23.9 | 161 |
| bta-miR-375  | -22.1 | 476 |
| bta-miR-375  | -20.9 | 354 |
| bta-miR-375  | -20.6 | 412 |
| bta-miR-375  | -19.5 | 428 |
| bta-miR-375  | -19.2 | 560 |
| bta-miR-375  | -18.3 | 578 |
| bta-miR-375  | -18.3 | 81  |
| bta-miR-375  | -18.0 | 223 |
| bta-miR-375  | -17.8 | 263 |
| bta-miR-375  | -17.8 | 619 |
| bta-miR-375  | -16.0 | 299 |
| bta-miR-375  | -15.7 | 9   |
| bta-miR-375  | -15.4 | 121 |
| bta-miR-375  | -14.7 | 184 |
| bta-miR-375  | -14.3 | 55  |
| bta-miR-375  | -14.2 | 707 |
| bta-miR-375  | -14.0 | 242 |
| bta-miR-375  | -13.9 | 455 |

|             |       |     |
|-------------|-------|-----|
| bta-miR-375 | -13.3 | 108 |
| bta-miR-375 | -13.3 | 497 |
| bta-miR-375 | -13.1 | 543 |
| bta-miR-375 | -12.9 | 740 |
| bta-miR-375 | -12.7 | 660 |
| bta-miR-375 | -12.6 | 332 |
| bta-miR-375 | -12.2 | 606 |
| bta-miR-375 | -11.4 | 147 |
| bta-miR-375 | -11.4 | 377 |
| bta-miR-375 | -11.3 | 204 |
| bta-miR-375 | -10.6 | 401 |
| bta-miR-377 | -19.5 | 614 |
| bta-miR-377 | -19.0 | 66  |
| bta-miR-377 | -18.1 | 353 |
| bta-miR-377 | -18.1 | 654 |
| bta-miR-377 | -16.9 | 571 |
| bta-miR-377 | -16.3 | 517 |
| bta-miR-377 | -16.3 | 537 |
| bta-miR-377 | -15.7 | 469 |
| bta-miR-377 | -15.7 | 13  |
| bta-miR-377 | -14.8 | 739 |
| bta-miR-377 | -14.2 | 271 |
| bta-miR-377 | -13.9 | 415 |
| bta-miR-377 | -13.8 | 106 |
| bta-miR-377 | -13.8 | 557 |
| bta-miR-377 | -13.7 | 22  |
| bta-miR-377 | -12.6 | 240 |
| bta-miR-377 | -12.5 | 450 |
| bta-miR-377 | -12.4 | 307 |
| bta-miR-377 | -12.4 | 667 |
| bta-miR-377 | -11.7 | 172 |
| bta-miR-377 | -11.2 | 202 |
| bta-miR-377 | -11.0 | 84  |
| bta-miR-377 | -11.0 | 548 |
| bta-miR-377 | -10.9 | 2   |
| bta-miR-377 | -10.9 | 46  |
| bta-miR-377 | -10.5 | 696 |
| bta-miR-377 | -10.5 | 126 |
| bta-miR-377 | -10.5 | 408 |
| bta-miR-377 | -10.1 | 149 |
| bta-miR-378 | -25.9 | 563 |
| bta-miR-378 | -24.7 | 212 |
| bta-miR-378 | -24.5 | 473 |
| bta-miR-378 | -24.4 | 73  |
| bta-miR-378 | -23.6 | 109 |
| bta-miR-378 | -21.9 | 586 |
| bta-miR-378 | -21.8 | 425 |
| bta-miR-378 | -21.5 | 186 |
| bta-miR-378 | -21.3 | 381 |
| bta-miR-378 | -19.1 | 361 |
| bta-miR-378 | -19.0 | 502 |
| bta-miR-378 | -18.0 | 308 |
| bta-miR-378 | -17.9 | 51  |
| bta-miR-378 | -17.7 | 4   |
| bta-miR-378 | -17.5 | 143 |
| bta-miR-378 | -17.1 | 639 |
| bta-miR-378 | -16.5 | 130 |
| bta-miR-378 | -15.7 | 681 |
| bta-miR-378 | -15.4 | 623 |

|             |       |     |
|-------------|-------|-----|
| bta-miR-378 | -15.0 | 244 |
| bta-miR-378 | -14.9 | 716 |
| bta-miR-378 | -14.2 | 520 |
| bta-miR-378 | -13.0 | 284 |
| bta-miR-378 | -12.3 | 331 |
| bta-miR-378 | -11.5 | 415 |
| bta-miR-378 | -10.2 | 270 |
| bta-miR-378 | -10.0 | 466 |
| bta-miR-379 | -22.3 | 91  |
| bta-miR-379 | -21.2 | 458 |
| bta-miR-379 | -20.1 | 561 |
| bta-miR-379 | -19.6 | 388 |
| bta-miR-379 | -18.0 | 650 |
| bta-miR-379 | -16.4 | 502 |
| bta-miR-379 | -16.0 | 283 |
| bta-miR-379 | -15.9 | 14  |
| bta-miR-379 | -14.9 | 230 |
| bta-miR-379 | -14.9 | 416 |
| bta-miR-379 | -14.7 | 309 |
| bta-miR-379 | -14.6 | 363 |
| bta-miR-379 | -14.1 | 248 |
| bta-miR-379 | -13.8 | 34  |
| bta-miR-379 | -13.4 | 57  |
| bta-miR-379 | -12.9 | 531 |
| bta-miR-379 | -12.4 | 146 |
| bta-miR-379 | -12.0 | 4   |
| bta-miR-379 | -11.9 | 691 |
| bta-miR-379 | -11.1 | 169 |
| bta-miR-379 | -11.1 | 707 |
| bta-miR-379 | -11.1 | 583 |
| bta-miR-379 | -10.8 | 209 |
| bta-miR-379 | -10.5 | 619 |
| bta-miR-379 | -10.3 | 77  |
| bta-miR-379 | -10.3 | 122 |
| bta-miR-379 | -10.3 | 741 |
| bta-miR-379 | -10.1 | 343 |
| bta-miR-381 | -29.4 | 238 |
| bta-miR-381 | -27.9 | 66  |
| bta-miR-381 | -25.8 | 613 |
| bta-miR-381 | -24.4 | 199 |
| bta-miR-381 | -23.6 | 410 |
| bta-miR-381 | -23.0 | 348 |
| bta-miR-381 | -20.6 | 494 |
| bta-miR-381 | -20.5 | 106 |
| bta-miR-381 | -19.3 | 278 |
| bta-miR-381 | -18.5 | 22  |
| bta-miR-381 | -18.3 | 451 |
| bta-miR-381 | -17.1 | 172 |
| bta-miR-381 | -16.5 | 654 |
| bta-miR-381 | -14.8 | 559 |
| bta-miR-381 | -14.8 | 479 |
| bta-miR-381 | -14.5 | 737 |
| bta-miR-381 | -14.1 | 376 |
| bta-miR-381 | -14.0 | 149 |
| bta-miR-381 | -13.6 | 264 |
| bta-miR-381 | -13.5 | 440 |
| bta-miR-381 | -13.4 | 220 |
| bta-miR-381 | -13.1 | 537 |
| bta-miR-381 | -12.4 | 307 |

|             |       |     |
|-------------|-------|-----|
| bta-miR-381 | -12.3 | 635 |
| bta-miR-381 | -12.2 | 571 |
| bta-miR-381 | -12.1 | 167 |
| bta-miR-381 | -11.9 | 128 |
| bta-miR-381 | -11.5 | 257 |
| bta-miR-381 | -11.5 | 595 |
| bta-miR-381 | -11.4 | 1   |
| bta-miR-381 | -11.0 | 695 |
| bta-miR-381 | -10.9 | 551 |
| bta-miR-381 | -10.3 | 51  |
| bta-miR-381 | -10.0 | 228 |
| bta-miR-382 | -22.4 | 621 |
| bta-miR-382 | -20.6 | 589 |
| bta-miR-382 | -19.9 | 356 |
| bta-miR-382 | -19.5 | 114 |
| bta-miR-382 | -19.2 | 233 |
| bta-miR-382 | -19.0 | 188 |
| bta-miR-382 | -18.3 | 312 |
| bta-miR-382 | -18.0 | 52  |
| bta-miR-382 | -17.8 | 258 |
| bta-miR-382 | -17.4 | 140 |
| bta-miR-382 | -17.0 | 499 |
| bta-miR-382 | -16.9 | 85  |
| bta-miR-382 | -16.5 | 164 |
| bta-miR-382 | -16.2 | 463 |
| bta-miR-382 | -15.9 | 561 |
| bta-miR-382 | -15.4 | 1   |
| bta-miR-382 | -15.1 | 401 |
| bta-miR-382 | -14.4 | 710 |
| bta-miR-382 | -14.3 | 423 |
| bta-miR-382 | -13.9 | 28  |
| bta-miR-382 | -13.3 | 663 |
| bta-miR-382 | -12.4 | 580 |
| bta-miR-382 | -12.2 | 294 |
| bta-miR-382 | -12.0 | 445 |
| bta-miR-382 | -11.6 | 692 |
| bta-miR-382 | -11.5 | 341 |
| bta-miR-382 | -11.4 | 133 |
| bta-miR-382 | -10.6 | 515 |
| bta-miR-383 | -22.4 | 559 |
| bta-miR-383 | -22.1 | 50  |
| bta-miR-383 | -21.9 | 198 |
| bta-miR-383 | -21.7 | 482 |
| bta-miR-383 | -21.0 | 407 |
| bta-miR-383 | -20.1 | 119 |
| bta-miR-383 | -19.8 | 361 |
| bta-miR-383 | -19.3 | 456 |
| bta-miR-383 | -18.5 | 669 |
| bta-miR-383 | -17.8 | 166 |
| bta-miR-383 | -15.8 | 72  |
| bta-miR-383 | -15.7 | 331 |
| bta-miR-383 | -15.4 | 308 |
| bta-miR-383 | -15.3 | 243 |
| bta-miR-383 | -15.0 | 707 |
| bta-miR-383 | -15.0 | 12  |
| bta-miR-383 | -14.8 | 623 |
| bta-miR-383 | -14.5 | 270 |
| bta-miR-383 | -14.5 | 511 |
| bta-miR-383 | -14.4 | 155 |

|              |       |     |
|--------------|-------|-----|
| bta-miR-383  | -14.4 | 97  |
| bta-miR-383  | -14.3 | 136 |
| bta-miR-383  | -12.2 | 393 |
| bta-miR-383  | -12.0 | 426 |
| bta-miR-383  | -11.2 | 733 |
| bta-miR-383  | -11.0 | 651 |
| bta-miR-383  | -10.7 | 594 |
| bta-miR-383  | -10.0 | 294 |
| bta-miR-383  | -10.0 | 532 |
| bta-miR-409a | -27.7 | 606 |
| bta-miR-409a | -25.6 | 493 |
| bta-miR-409a | -25.4 | 554 |
| bta-miR-409a | -23.1 | 408 |
| bta-miR-409a | -23.0 | 66  |
| bta-miR-409a | -22.2 | 3   |
| bta-miR-409a | -21.6 | 428 |
| bta-miR-409a | -20.0 | 469 |
| bta-miR-409a | -19.2 | 573 |
| bta-miR-409a | -18.9 | 654 |
| bta-miR-409a | -18.1 | 271 |
| bta-miR-409a | -17.8 | 525 |
| bta-miR-409a | -17.1 | 379 |
| bta-miR-409a | -17.1 | 95  |
| bta-miR-409a | -16.1 | 686 |
| bta-miR-409a | -15.8 | 172 |
| bta-miR-409a | -15.1 | 30  |
| bta-miR-409a | -14.9 | 738 |
| bta-miR-409a | -14.8 | 352 |
| bta-miR-409a | -14.3 | 199 |
| bta-miR-409a | -13.1 | 220 |
| bta-miR-409a | -12.9 | 307 |
| bta-miR-409a | -10.4 | 251 |
| bta-miR-409a | -10.2 | 155 |
| bta-miR-409a | -10.2 | 519 |
| bta-miR-410  | -20.5 | 10  |
| bta-miR-410  | -19.7 | 423 |
| bta-miR-410  | -19.0 | 84  |
| bta-miR-410  | -18.8 | 560 |
| bta-miR-410  | -18.4 | 575 |
| bta-miR-410  | -17.9 | 516 |
| bta-miR-410  | -17.7 | 602 |
| bta-miR-410  | -17.2 | 376 |
| bta-miR-410  | -16.9 | 481 |
| bta-miR-410  | -15.6 | 51  |
| bta-miR-410  | -15.2 | 454 |
| bta-miR-410  | -15.0 | 241 |
| bta-miR-410  | -15.0 | 631 |
| bta-miR-410  | -14.7 | 539 |
| bta-miR-410  | -14.6 | 408 |
| bta-miR-410  | -14.0 | 154 |
| bta-miR-410  | -13.8 | 106 |
| bta-miR-410  | -13.4 | 122 |
| bta-miR-410  | -13.1 | 473 |
| bta-miR-410  | -12.8 | 199 |
| bta-miR-410  | -12.8 | 649 |
| bta-miR-410  | -12.7 | 278 |
| bta-miR-410  | -12.6 | 342 |
| bta-miR-410  | -12.6 | 71  |
| bta-miR-410  | -12.4 | 358 |

|             |       |     |
|-------------|-------|-----|
| bta-miR-410 | -12.2 | 30  |
| bta-miR-410 | -11.8 | 669 |
| bta-miR-410 | -11.6 | 269 |
| bta-miR-410 | -11.4 | 165 |
| bta-miR-410 | -11.0 | 746 |
| bta-miR-410 | -10.9 | 304 |
| bta-miR-410 | -10.3 | 623 |
| bta-miR-411 | -18.6 | 555 |
| bta-miR-411 | -18.4 | 454 |
| bta-miR-411 | -18.2 | 412 |
| bta-miR-411 | -18.2 | 518 |
| bta-miR-411 | -17.2 | 618 |
| bta-miR-411 | -17.0 | 8   |
| bta-miR-411 | -14.6 | 71  |
| bta-miR-411 | -14.6 | 654 |
| bta-miR-411 | -14.4 | 379 |
| bta-miR-411 | -14.1 | 25  |
| bta-miR-411 | -13.3 | 729 |
| bta-miR-411 | -13.1 | 359 |
| bta-miR-411 | -13.0 | 585 |
| bta-miR-411 | -12.9 | 109 |
| bta-miR-411 | -11.9 | 172 |
| bta-miR-411 | -11.7 | 685 |
| bta-miR-411 | -11.3 | 473 |
| bta-miR-411 | -11.0 | 280 |
| bta-miR-411 | -10.8 | 544 |
| bta-miR-411 | -10.6 | 497 |
| bta-miR-411 | -10.3 | 305 |
| bta-miR-411 | -10.1 | 154 |
| bta-miR-412 | -25.7 | 605 |
| bta-miR-412 | -25.0 | 407 |
| bta-miR-412 | -24.0 | 12  |
| bta-miR-412 | -23.9 | 488 |
| bta-miR-412 | -23.8 | 64  |
| bta-miR-412 | -20.8 | 353 |
| bta-miR-412 | -20.5 | 559 |
| bta-miR-412 | -19.7 | 106 |
| bta-miR-412 | -19.7 | 473 |
| bta-miR-412 | -19.6 | 170 |
| bta-miR-412 | -18.9 | 623 |
| bta-miR-412 | -18.7 | 586 |
| bta-miR-412 | -18.6 | 264 |
| bta-miR-412 | -17.9 | 435 |
| bta-miR-412 | -17.8 | 37  |
| bta-miR-412 | -16.9 | 653 |
| bta-miR-412 | -16.8 | 224 |
| bta-miR-412 | -15.6 | 456 |
| bta-miR-412 | -13.4 | 199 |
| bta-miR-412 | -13.1 | 86  |
| bta-miR-412 | -12.7 | 737 |
| bta-miR-412 | -12.5 | 155 |
| bta-miR-412 | -12.5 | 698 |
| bta-miR-412 | -12.4 | 119 |
| bta-miR-412 | -12.3 | 517 |
| bta-miR-412 | -11.1 | 341 |
| bta-miR-412 | -10.3 | 282 |
| bta-miR-421 | -23.3 | 244 |
| bta-miR-421 | -23.1 | 30  |
| bta-miR-421 | -18.9 | 359 |

|             |       |     |
|-------------|-------|-----|
| bta-miR-421 | -18.8 | 71  |
| bta-miR-421 | -17.7 | 518 |
| bta-miR-421 | -17.6 | 428 |
| bta-miR-421 | -17.3 | 565 |
| bta-miR-421 | -16.7 | 167 |
| bta-miR-421 | -15.9 | 461 |
| bta-miR-421 | -15.6 | 622 |
| bta-miR-421 | -15.4 | 408 |
| bta-miR-421 | -15.0 | 51  |
| bta-miR-421 | -14.7 | 109 |
| bta-miR-421 | -14.6 | 3   |
| bta-miR-421 | -13.9 | 330 |
| bta-miR-421 | -13.3 | 283 |
| bta-miR-421 | -13.2 | 659 |
| bta-miR-421 | -13.2 | 206 |
| bta-miR-421 | -13.0 | 96  |
| bta-miR-421 | -13.0 | 235 |
| bta-miR-421 | -12.8 | 483 |
| bta-miR-421 | -12.2 | 307 |
| bta-miR-421 | -12.0 | 119 |
| bta-miR-421 | -11.1 | 551 |
| bta-miR-421 | -10.9 | 18  |
| bta-miR-421 | -10.3 | 126 |
| bta-miR-421 | -10.2 | 142 |
| bta-miR-421 | -10.1 | 135 |
| bta-miR-421 | -10.1 | 324 |
| bta-miR-421 | -10.1 | 697 |
| bta-miR-429 | -20.6 | 488 |
| bta-miR-429 | -20.1 | 115 |
| bta-miR-429 | -19.5 | 597 |
| bta-miR-429 | -19.2 | 413 |
| bta-miR-429 | -18.8 | 230 |
| bta-miR-429 | -18.5 | 359 |
| bta-miR-429 | -17.0 | 662 |
| bta-miR-429 | -17.0 | 19  |
| bta-miR-429 | -16.9 | 507 |
| bta-miR-429 | -16.6 | 155 |
| bta-miR-429 | -16.6 | 85  |
| bta-miR-429 | -15.3 | 270 |
| bta-miR-429 | -14.9 | 463 |
| bta-miR-429 | -14.6 | 617 |
| bta-miR-429 | -13.5 | 560 |
| bta-miR-429 | -13.3 | 177 |
| bta-miR-429 | -12.6 | 9   |
| bta-miR-429 | -12.6 | 204 |
| bta-miR-429 | -12.4 | 64  |
| bta-miR-429 | -12.4 | 741 |
| bta-miR-429 | -11.9 | 341 |
| bta-miR-429 | -11.6 | 428 |
| bta-miR-429 | -11.0 | 261 |
| bta-miR-429 | -10.3 | 654 |
| bta-miR-431 | -28.2 | 402 |
| bta-miR-431 | -26.1 | 60  |
| bta-miR-431 | -24.7 | 5   |
| bta-miR-431 | -24.1 | 581 |
| bta-miR-431 | -23.5 | 474 |
| bta-miR-431 | -23.3 | 352 |
| bta-miR-431 | -22.8 | 111 |
| bta-miR-431 | -22.4 | 616 |



|             |       |     |
|-------------|-------|-----|
| bta-miR-431 | -20.7 | 249 |
| bta-miR-431 | -20.1 | 542 |
| bta-miR-431 | -19.3 | 185 |
| bta-miR-431 | -18.4 | 654 |
| bta-miR-431 | -18.1 | 156 |
| bta-miR-431 | -18.0 | 561 |
| bta-miR-431 | -16.9 | 87  |
| bta-miR-431 | -15.9 | 206 |
| bta-miR-431 | -15.4 | 229 |
| bta-miR-431 | -15.4 | 377 |
| bta-miR-431 | -14.8 | 738 |
| bta-miR-431 | -13.7 | 519 |
| bta-miR-431 | -13.4 | 331 |
| bta-miR-431 | -13.1 | 31  |
| bta-miR-431 | -12.4 | 445 |
| bta-miR-431 | -12.3 | 292 |
| bta-miR-431 | -11.3 | 457 |
| bta-miR-431 | -11.1 | 685 |
| bta-miR-431 | -10.7 | 276 |
| bta-miR-432 | -24.4 | 361 |
| bta-miR-432 | -24.2 | 561 |
| bta-miR-432 | -24.1 | 325 |
| bta-miR-432 | -23.5 | 407 |
| bta-miR-432 | -23.2 | 161 |
| bta-miR-432 | -22.5 | 260 |
| bta-miR-432 | -22.5 | 117 |
| bta-miR-432 | -22.4 | 458 |
| bta-miR-432 | -21.2 | 511 |
| bta-miR-432 | -20.0 | 13  |
| bta-miR-432 | -19.3 | 587 |
| bta-miR-432 | -19.2 | 299 |
| bta-miR-432 | -17.9 | 655 |
| bta-miR-432 | -17.7 | 207 |
| bta-miR-432 | -17.7 | 624 |
| bta-miR-432 | -17.3 | 73  |
| bta-miR-432 | -17.2 | 136 |
| bta-miR-432 | -16.8 | 244 |
| bta-miR-432 | -16.3 | 696 |
| bta-miR-432 | -16.0 | 384 |
| bta-miR-432 | -15.2 | 489 |
| bta-miR-432 | -15.1 | 52  |
| bta-miR-432 | -12.5 | 537 |
| bta-miR-432 | -12.1 | 734 |
| bta-miR-432 | -11.3 | 109 |
| bta-miR-432 | -10.9 | 482 |
| bta-miR-433 | -23.4 | 415 |
| bta-miR-433 | -23.3 | 473 |
| bta-miR-433 | -23.0 | 13  |
| bta-miR-433 | -22.8 | 452 |
| bta-miR-433 | -22.8 | 160 |
| bta-miR-433 | -22.7 | 275 |
| bta-miR-433 | -21.5 | 216 |
| bta-miR-433 | -21.1 | 66  |
| bta-miR-433 | -20.3 | 571 |
| bta-miR-433 | -20.1 | 620 |
| bta-miR-433 | -19.9 | 234 |
| bta-miR-433 | -19.3 | 319 |
| bta-miR-433 | -19.3 | 593 |
| bta-miR-433 | -19.1 | 353 |

|              |       |     |
|--------------|-------|-----|
| bta-miR-433  | -17.8 | 109 |
| bta-miR-433  | -17.7 | 654 |
| bta-miR-433  | -16.4 | 86  |
| bta-miR-433  | -16.2 | 494 |
| bta-miR-433  | -15.9 | 383 |
| bta-miR-433  | -14.6 | 266 |
| bta-miR-433  | -14.3 | 137 |
| bta-miR-433  | -14.1 | 199 |
| bta-miR-433  | -14.0 | 1   |
| bta-miR-433  | -13.9 | 50  |
| bta-miR-433  | -13.9 | 436 |
| bta-miR-433  | -13.3 | 341 |
| bta-miR-433  | -12.8 | 559 |
| bta-miR-433  | -12.8 | 739 |
| bta-miR-433  | -12.6 | 523 |
| bta-miR-433  | -12.5 | 702 |
| bta-miR-433  | -12.0 | 542 |
| bta-miR-433  | -11.8 | 185 |
| bta-miR-433  | -10.9 | 125 |
| bta-miR-433  | -10.9 | 407 |
| bta-miR-433  | -10.9 | 613 |
| bta-miR-433  | -10.6 | 149 |
| bta-miR-433  | -10.3 | 308 |
| bta-miR-448  | -25.6 | 81  |
| bta-miR-448  | -22.9 | 505 |
| bta-miR-448  | -21.8 | 478 |
| bta-miR-448  | -21.5 | 266 |
| bta-miR-448  | -19.7 | 347 |
| bta-miR-448  | -19.1 | 621 |
| bta-miR-448  | -18.7 | 15  |
| bta-miR-448  | -18.1 | 176 |
| bta-miR-448  | -17.9 | 417 |
| bta-miR-448  | -17.0 | 598 |
| bta-miR-448  | -16.4 | 450 |
| bta-miR-448  | -15.2 | 576 |
| bta-miR-448  | -15.2 | 113 |
| bta-miR-448  | -14.5 | 70  |
| bta-miR-448  | -14.3 | 710 |
| bta-miR-448  | -14.3 | 658 |
| bta-miR-448  | -14.1 | 297 |
| bta-miR-448  | -14.0 | 230 |
| bta-miR-448  | -13.0 | 40  |
| bta-miR-448  | -11.9 | 635 |
| bta-miR-448  | -11.7 | 609 |
| bta-miR-448  | -11.1 | 401 |
| bta-miR-448  | -11.0 | 383 |
| bta-miR-448  | -11.0 | 614 |
| bta-miR-448  | -10.6 | 539 |
| bta-miR-448  | -10.4 | 464 |
| bta-miR-448  | -10.3 | 690 |
| bta-miR-448  | -10.1 | 160 |
| bta-miR-449a | -27.3 | 99  |
| bta-miR-449a | -26.2 | 408 |
| bta-miR-449a | -23.8 | 12  |
| bta-miR-449a | -21.0 | 563 |
| bta-miR-449a | -20.1 | 164 |
| bta-miR-449a | -20.0 | 636 |
| bta-miR-449a | -19.9 | 72  |
| bta-miR-449a | -19.1 | 341 |

|              |       |     |
|--------------|-------|-----|
| bta-miR-449a | -19.0 | 456 |
| bta-miR-449a | -18.3 | 515 |
| bta-miR-449a | -18.2 | 367 |
| bta-miR-449a | -17.6 | 483 |
| bta-miR-449a | -17.2 | 34  |
| bta-miR-449a | -17.1 | 126 |
| bta-miR-449a | -16.7 | 263 |
| bta-miR-449a | -15.7 | 595 |
| bta-miR-449a | -15.5 | 693 |
| bta-miR-449a | -13.7 | 294 |
| bta-miR-449a | -13.7 | 237 |
| bta-miR-449a | -13.2 | 739 |
| bta-miR-449a | -12.4 | 200 |
| bta-miR-449a | -10.7 | 610 |
| bta-miR-449a | -10.7 | 431 |
| bta-miR-449a | -10.4 | 1   |
| bta-miR-449a | -10.1 | 392 |
| bta-miR-449b | -27.2 | 408 |
| bta-miR-449b | -26.4 | 99  |
| bta-miR-449b | -25.3 | 8   |
| bta-miR-449b | -21.8 | 563 |
| bta-miR-449b | -21.0 | 66  |
| bta-miR-449b | -20.2 | 164 |
| bta-miR-449b | -20.0 | 456 |
| bta-miR-449b | -19.1 | 515 |
| bta-miR-449b | -19.0 | 645 |
| bta-miR-449b | -18.7 | 342 |
| bta-miR-449b | -18.4 | 483 |
| bta-miR-449b | -18.1 | 126 |
| bta-miR-449b | -17.0 | 263 |
| bta-miR-449b | -16.5 | 698 |
| bta-miR-449b | -16.2 | 34  |
| bta-miR-449b | -15.3 | 155 |
| bta-miR-449b | -15.0 | 372 |
| bta-miR-449b | -14.7 | 294 |
| bta-miR-449b | -14.2 | 596 |
| bta-miR-449b | -13.0 | 198 |
| bta-miR-449b | -12.9 | 237 |
| bta-miR-449b | -12.6 | 663 |
| bta-miR-449b | -12.5 | 623 |
| bta-miR-449b | -12.5 | 729 |
| bta-miR-449b | -10.7 | 435 |
| bta-miR-449b | -10.6 | 544 |
| bta-miR-449b | -10.2 | 392 |
| bta-miR-449c | -27.3 | 12  |
| bta-miR-449c | -25.8 | 414 |
| bta-miR-449c | -24.7 | 169 |
| bta-miR-449c | -23.6 | 107 |
| bta-miR-449c | -22.7 | 515 |
| bta-miR-449c | -22.3 | 342 |
| bta-miR-449c | -22.2 | 64  |
| bta-miR-449c | -21.7 | 198 |
| bta-miR-449c | -20.1 | 462 |
| bta-miR-449c | -19.9 | 545 |
| bta-miR-449c | -19.6 | 623 |
| bta-miR-449c | -18.3 | 34  |
| bta-miR-449c | -17.7 | 237 |
| bta-miR-449c | -16.9 | 435 |
| bta-miR-449c | -16.9 | 653 |

|              |       |     |
|--------------|-------|-----|
| bta-miR-449c | -16.1 | 125 |
| bta-miR-449c | -16.1 | 605 |
| bta-miR-449c | -16.0 | 572 |
| bta-miR-449c | -15.9 | 282 |
| bta-miR-449c | -15.2 | 370 |
| bta-miR-449c | -13.6 | 263 |
| bta-miR-449c | -13.4 | 495 |
| bta-miR-449c | -13.3 | 698 |
| bta-miR-449c | -13.0 | 737 |
| bta-miR-449c | -12.5 | 392 |
| bta-miR-449c | -12.2 | 155 |
| bta-miR-449c | -12.0 | 1   |
| bta-miR-449c | -11.7 | 219 |
| bta-miR-449c | -10.9 | 94  |
| bta-miR-449c | -10.1 | 228 |
| bta-miR-449c | -10.1 | 589 |
| bta-miR-451  | -19.6 | 406 |
| bta-miR-451  | -18.9 | 600 |
| bta-miR-451  | -17.9 | 262 |
| bta-miR-451  | -17.3 | 624 |
| bta-miR-451  | -16.3 | 11  |
| bta-miR-451  | -15.3 | 71  |
| bta-miR-451  | -15.0 | 486 |
| bta-miR-451  | -13.5 | 516 |
| bta-miR-451  | -12.7 | 648 |
| bta-miR-451  | -12.1 | 166 |
| bta-miR-451  | -12.0 | 432 |
| bta-miR-451  | -11.9 | 574 |
| bta-miR-451  | -11.8 | 145 |
| bta-miR-451  | -11.5 | 701 |
| bta-miR-451  | -11.5 | 216 |
| bta-miR-451  | -11.3 | 731 |
| bta-miR-451  | -11.2 | 351 |
| bta-miR-451  | -11.1 | 107 |
| bta-miR-451  | -10.4 | 188 |
| bta-miR-451  | -10.3 | 475 |
| bta-miR-452  | -23.3 | 461 |
| bta-miR-452  | -21.8 | 566 |
| bta-miR-452  | -20.8 | 262 |
| bta-miR-452  | -20.5 | 681 |
| bta-miR-452  | -20.1 | 626 |
| bta-miR-452  | -18.9 | 502 |
| bta-miR-452  | -17.6 | 276 |
| bta-miR-452  | -17.3 | 541 |
| bta-miR-452  | -17.0 | 55  |
| bta-miR-452  | -17.0 | 181 |
| bta-miR-452  | -16.9 | 395 |
| bta-miR-452  | -16.6 | 97  |
| bta-miR-452  | -16.2 | 14  |
| bta-miR-452  | -15.1 | 707 |
| bta-miR-452  | -14.9 | 356 |
| bta-miR-452  | -14.5 | 212 |
| bta-miR-452  | -14.1 | 235 |
| bta-miR-452  | -13.5 | 310 |
| bta-miR-452  | -13.3 | 376 |
| bta-miR-452  | -13.3 | 491 |
| bta-miR-452  | -13.2 | 657 |
| bta-miR-452  | -12.9 | 139 |
| bta-miR-452  | -12.8 | 421 |

|             |       |     |
|-------------|-------|-----|
| bta-miR-452 | -12.7 | 165 |
| bta-miR-452 | -12.2 | 2   |
| bta-miR-452 | -11.9 | 596 |
| bta-miR-452 | -11.4 | 74  |
| bta-miR-452 | -10.8 | 521 |
| bta-miR-452 | -10.6 | 288 |
| bta-miR-452 | -10.2 | 37  |
| bta-miR-452 | -10.2 | 128 |
| bta-miR-453 | -24.6 | 359 |
| bta-miR-453 | -24.5 | 93  |
| bta-miR-453 | -24.4 | 697 |
| bta-miR-453 | -24.0 | 619 |
| bta-miR-453 | -23.5 | 25  |
| bta-miR-453 | -23.4 | 497 |
| bta-miR-453 | -22.9 | 412 |
| bta-miR-453 | -21.8 | 562 |
| bta-miR-453 | -21.1 | 455 |
| bta-miR-453 | -20.7 | 185 |
| bta-miR-453 | -20.7 | 126 |
| bta-miR-453 | -20.1 | 585 |
| bta-miR-453 | -18.5 | 257 |
| bta-miR-453 | -18.4 | 312 |
| bta-miR-453 | -16.8 | 69  |
| bta-miR-453 | -16.6 | 644 |
| bta-miR-453 | -16.2 | 476 |
| bta-miR-453 | -15.9 | 231 |
| bta-miR-453 | -15.3 | 281 |
| bta-miR-453 | -14.9 | 378 |
| bta-miR-453 | -13.7 | 167 |
| bta-miR-453 | -13.3 | 211 |
| bta-miR-453 | -12.2 | 3   |
| bta-miR-453 | -12.0 | 730 |
| bta-miR-453 | -11.9 | 53  |
| bta-miR-453 | -11.3 | 518 |
| bta-miR-453 | -11.1 | 607 |
| bta-miR-454 | -24.3 | 361 |
| bta-miR-454 | -21.6 | 473 |
| bta-miR-454 | -20.3 | 401 |
| bta-miR-454 | -19.7 | 167 |
| bta-miR-454 | -19.1 | 109 |
| bta-miR-454 | -18.8 | 5   |
| bta-miR-454 | -18.8 | 191 |
| bta-miR-454 | -17.7 | 429 |
| bta-miR-454 | -17.6 | 59  |
| bta-miR-454 | -17.6 | 624 |
| bta-miR-454 | -17.5 | 260 |
| bta-miR-454 | -16.8 | 510 |
| bta-miR-454 | -16.3 | 563 |
| bta-miR-454 | -14.5 | 30  |
| bta-miR-454 | -14.2 | 275 |
| bta-miR-454 | -14.1 | 681 |
| bta-miR-454 | -13.8 | 78  |
| bta-miR-454 | -13.1 | 652 |
| bta-miR-454 | -12.5 | 596 |
| bta-miR-454 | -12.2 | 715 |
| bta-miR-454 | -11.5 | 540 |
| bta-miR-454 | -11.0 | 211 |
| bta-miR-454 | -10.7 | 341 |
| bta-miR-454 | -10.6 | 247 |

|             |       |     |
|-------------|-------|-----|
| bta-miR-454 | -10.6 | 141 |
| bta-miR-454 | -10.1 | 320 |
| bta-miR-454 | -10.1 | 327 |
| bta-miR-483 | -29.9 | 604 |
| bta-miR-483 | -25.3 | 443 |
| bta-miR-483 | -21.3 | 218 |
| bta-miR-483 | -20.8 | 265 |
| bta-miR-483 | -20.0 | 66  |
| bta-miR-483 | -17.7 | 414 |
| bta-miR-483 | -17.3 | 11  |
| bta-miR-483 | -16.5 | 478 |
| bta-miR-483 | -15.5 | 348 |
| bta-miR-483 | -13.8 | 505 |
| bta-miR-483 | -13.2 | 597 |
| bta-miR-483 | -13.0 | 366 |
| bta-miR-483 | -12.7 | 153 |
| bta-miR-483 | -12.4 | 736 |
| bta-miR-483 | -11.9 | 570 |
| bta-miR-483 | -10.7 | 202 |
| bta-miR-483 | -10.7 | 240 |
| bta-miR-485 | -28.4 | 454 |
| bta-miR-485 | -26.3 | 405 |
| bta-miR-485 | -22.9 | 102 |
| bta-miR-485 | -22.5 | 294 |
| bta-miR-485 | -21.8 | 9   |
| bta-miR-485 | -21.5 | 384 |
| bta-miR-485 | -20.4 | 145 |
| bta-miR-485 | -19.4 | 263 |
| bta-miR-485 | -19.4 | 551 |
| bta-miR-485 | -19.1 | 53  |
| bta-miR-485 | -18.6 | 312 |
| bta-miR-485 | -18.0 | 233 |
| bta-miR-485 | -17.6 | 480 |
| bta-miR-485 | -17.2 | 178 |
| bta-miR-485 | -17.1 | 496 |
| bta-miR-485 | -17.0 | 655 |
| bta-miR-485 | -16.6 | 611 |
| bta-miR-485 | -15.8 | 83  |
| bta-miR-485 | -14.9 | 23  |
| bta-miR-485 | -14.7 | 354 |
| bta-miR-485 | -14.2 | 704 |
| bta-miR-485 | -14.1 | 35  |
| bta-miR-485 | -13.9 | 730 |
| bta-miR-485 | -13.4 | 596 |
| bta-miR-485 | -11.3 | 532 |
| bta-miR-485 | -11.1 | 128 |
| bta-miR-485 | -10.9 | 687 |
| bta-miR-485 | -10.9 | 370 |
| bta-miR-485 | -10.6 | 170 |
| bta-miR-485 | -10.5 | 434 |
| bta-miR-485 | -10.2 | 252 |
| bta-miR-486 | -28.8 | 477 |
| bta-miR-486 | -26.7 | 615 |
| bta-miR-486 | -25.2 | 267 |
| bta-miR-486 | -22.8 | 82  |
| bta-miR-486 | -22.3 | 421 |
| bta-miR-486 | -21.1 | 597 |
| bta-miR-486 | -20.8 | 39  |
| bta-miR-486 | -20.7 | 449 |

|             |       |     |
|-------------|-------|-----|
| bta-miR-486 | -19.3 | 155 |
| bta-miR-486 | -18.7 | 112 |
| bta-miR-486 | -16.9 | 5   |
| bta-miR-486 | -16.5 | 397 |
| bta-miR-486 | -15.7 | 190 |
| bta-miR-486 | -14.2 | 576 |
| bta-miR-486 | -13.8 | 370 |
| bta-miR-486 | -12.9 | 657 |
| bta-miR-486 | -12.5 | 516 |
| bta-miR-486 | -12.2 | 232 |
| bta-miR-486 | -12.1 | 71  |
| bta-miR-486 | -12.1 | 742 |
| bta-miR-486 | -11.9 | 280 |
| bta-miR-486 | -11.4 | 351 |
| bta-miR-486 | -10.9 | 698 |
| bta-miR-486 | -10.8 | 542 |
| bta-miR-486 | -10.4 | 183 |
| bta-miR-488 | -20.9 | 99  |
| bta-miR-488 | -19.6 | 482 |
| bta-miR-488 | -19.3 | 595 |
| bta-miR-488 | -18.7 | 155 |
| bta-miR-488 | -18.1 | 341 |
| bta-miR-488 | -18.1 | 12  |
| bta-miR-488 | -18.0 | 570 |
| bta-miR-488 | -17.6 | 408 |
| bta-miR-488 | -17.1 | 51  |
| bta-miR-488 | -16.8 | 445 |
| bta-miR-488 | -16.7 | 229 |
| bta-miR-488 | -16.6 | 275 |
| bta-miR-488 | -15.5 | 500 |
| bta-miR-488 | -15.1 | 119 |
| bta-miR-488 | -15.1 | 366 |
| bta-miR-488 | -14.9 | 188 |
| bta-miR-488 | -14.4 | 298 |
| bta-miR-488 | -14.3 | 468 |
| bta-miR-488 | -13.8 | 607 |
| bta-miR-488 | -13.5 | 623 |
| bta-miR-488 | -13.3 | 558 |
| bta-miR-488 | -13.1 | 83  |
| bta-miR-488 | -12.4 | 669 |
| bta-miR-488 | -12.1 | 698 |
| bta-miR-488 | -11.9 | 130 |
| bta-miR-488 | -11.2 | 175 |
| bta-miR-488 | -11.1 | 393 |
| bta-miR-488 | -11.0 | 263 |
| bta-miR-488 | -10.6 | 731 |
| bta-miR-488 | -10.2 | 37  |
| bta-miR-488 | -10.2 | 216 |
| bta-miR-488 | -10.1 | 649 |
| bta-miR-490 | -27.9 | 22  |
| bta-miR-490 | -26.2 | 615 |
| bta-miR-490 | -24.0 | 198 |
| bta-miR-490 | -22.7 | 80  |
| bta-miR-490 | -22.7 | 228 |
| bta-miR-490 | -22.0 | 456 |
| bta-miR-490 | -21.4 | 419 |
| bta-miR-490 | -20.9 | 487 |
| bta-miR-490 | -20.4 | 107 |
| bta-miR-490 | -19.8 | 270 |

|             |       |     |
|-------------|-------|-----|
| bta-miR-490 | -19.8 | 559 |
| bta-miR-490 | -19.8 | 351 |
| bta-miR-490 | -18.9 | 64  |
| bta-miR-490 | -18.0 | 653 |
| bta-miR-490 | -17.7 | 170 |
| bta-miR-490 | -17.5 | 4   |
| bta-miR-490 | -16.2 | 376 |
| bta-miR-490 | -15.5 | 41  |
| bta-miR-490 | -15.0 | 580 |
| bta-miR-490 | -14.8 | 709 |
| bta-miR-490 | -14.6 | 258 |
| bta-miR-490 | -14.1 | 605 |
| bta-miR-490 | -12.7 | 130 |
| bta-miR-490 | -12.0 | 527 |
| bta-miR-490 | -11.9 | 140 |
| bta-miR-490 | -11.5 | 729 |
| bta-miR-490 | -11.4 | 308 |
| bta-miR-490 | -11.2 | 440 |
| bta-miR-490 | -10.8 | 328 |
| bta-miR-490 | -10.8 | 637 |
| bta-miR-491 | -23.2 | 9   |
| bta-miR-491 | -22.5 | 91  |
| bta-miR-491 | -22.0 | 261 |
| bta-miR-491 | -21.8 | 474 |
| bta-miR-491 | -21.5 | 607 |
| bta-miR-491 | -21.3 | 497 |
| bta-miR-491 | -20.4 | 309 |
| bta-miR-491 | -20.2 | 396 |
| bta-miR-491 | -19.7 | 230 |
| bta-miR-491 | -19.2 | 451 |
| bta-miR-491 | -18.6 | 564 |
| bta-miR-491 | -17.3 | 703 |
| bta-miR-491 | -17.3 | 140 |
| bta-miR-491 | -16.7 | 58  |
| bta-miR-491 | -16.5 | 168 |
| bta-miR-491 | -16.1 | 363 |
| bta-miR-491 | -16.1 | 630 |
| bta-miR-491 | -15.8 | 657 |
| bta-miR-491 | -14.4 | 329 |
| bta-miR-491 | -13.9 | 150 |
| bta-miR-491 | -13.5 | 210 |
| bta-miR-491 | -13.2 | 738 |
| bta-miR-491 | -11.6 | 541 |
| bta-miR-491 | -11.3 | 587 |
| bta-miR-491 | -11.3 | 40  |
| bta-miR-491 | -11.2 | 284 |
| bta-miR-491 | -10.7 | 680 |
| bta-miR-491 | -10.4 | 443 |
| bta-miR-493 | -28.5 | 484 |
| bta-miR-493 | -23.8 | 402 |
| bta-miR-493 | -22.2 | 60  |
| bta-miR-493 | -21.1 | 111 |
| bta-miR-493 | -21.1 | 270 |
| bta-miR-493 | -20.2 | 368 |
| bta-miR-493 | -19.1 | 596 |
| bta-miR-493 | -18.9 | 431 |
| bta-miR-493 | -18.7 | 12  |
| bta-miR-493 | -16.8 | 155 |
| bta-miR-493 | -16.8 | 231 |



|             |       |     |
|-------------|-------|-----|
| bta-miR-493 | -16.0 | 39  |
| bta-miR-493 | -16.0 | 192 |
| bta-miR-493 | -16.0 | 654 |
| bta-miR-493 | -15.9 | 581 |
| bta-miR-493 | -14.9 | 82  |
| bta-miR-493 | -14.8 | 507 |
| bta-miR-493 | -14.4 | 454 |
| bta-miR-493 | -13.9 | 560 |
| bta-miR-493 | -13.5 | 346 |
| bta-miR-493 | -12.6 | 292 |
| bta-miR-493 | -12.1 | 740 |
| bta-miR-493 | -11.7 | 696 |
| bta-miR-493 | -11.4 | 632 |
| bta-miR-493 | -10.5 | 216 |
| bta-miR-493 | -10.5 | 476 |
| bta-miR-493 | -10.2 | 176 |
| bta-miR-494 | -22.7 | 575 |
| bta-miR-494 | -18.7 | 539 |
| bta-miR-494 | -18.0 | 506 |
| bta-miR-494 | -17.8 | 620 |
| bta-miR-494 | -17.4 | 83  |
| bta-miR-494 | -16.4 | 240 |
| bta-miR-494 | -15.0 | 657 |
| bta-miR-494 | -14.4 | 16  |
| bta-miR-494 | -14.0 | 452 |
| bta-miR-494 | -13.9 | 368 |
| bta-miR-494 | -13.8 | 400 |
| bta-miR-494 | -13.1 | 423 |
| bta-miR-494 | -12.9 | 710 |
| bta-miR-494 | -12.7 | 479 |
| bta-miR-494 | -12.6 | 279 |
| bta-miR-494 | -12.5 | 679 |
| bta-miR-494 | -11.7 | 133 |
| bta-miR-494 | -11.3 | 111 |
| bta-miR-494 | -11.1 | 357 |
| bta-miR-494 | -11.1 | 154 |
| bta-miR-494 | -10.8 | 174 |
| bta-miR-494 | -10.5 | 202 |
| bta-miR-494 | -10.4 | 342 |
| bta-miR-494 | -10.4 | 59  |
| bta-miR-494 | -10.3 | 69  |
| bta-miR-494 | -10.3 | 218 |
| bta-miR-494 | -10.2 | 562 |
| bta-miR-494 | -10.0 | 324 |
| bta-miR-494 | -10.0 | 330 |
| bta-miR-495 | -20.3 | 506 |
| bta-miR-495 | -18.2 | 630 |
| bta-miR-495 | -18.0 | 375 |
| bta-miR-495 | -17.4 | 16  |
| bta-miR-495 | -17.3 | 450 |
| bta-miR-495 | -17.1 | 350 |
| bta-miR-495 | -16.3 | 654 |
| bta-miR-495 | -16.1 | 544 |
| bta-miR-495 | -14.7 | 232 |
| bta-miR-495 | -13.8 | 613 |
| bta-miR-495 | -13.7 | 68  |
| bta-miR-495 | -13.5 | 279 |
| bta-miR-495 | -13.3 | 479 |
| bta-miR-495 | -13.1 | 423 |

|             |       |     |
|-------------|-------|-----|
| bta-miR-495 | -13.0 | 574 |
| bta-miR-495 | -12.3 | 197 |
| bta-miR-495 | -12.1 | 408 |
| bta-miR-495 | -12.0 | 114 |
| bta-miR-495 | -12.0 | 265 |
| bta-miR-495 | -11.9 | 560 |
| bta-miR-495 | -11.5 | 736 |
| bta-miR-495 | -11.3 | 167 |
| bta-miR-495 | -11.0 | 598 |
| bta-miR-495 | -10.6 | 697 |
| bta-miR-495 | -10.5 | 43  |
| bta-miR-495 | -10.5 | 313 |
| bta-miR-495 | -10.3 | 176 |
| bta-miR-495 | -10.3 | 341 |
| bta-miR-495 | -10.1 | 218 |
| bta-miR-496 | -18.3 | 615 |
| bta-miR-496 | -17.2 | 12  |
| bta-miR-496 | -16.9 | 240 |
| bta-miR-496 | -15.8 | 663 |
| bta-miR-496 | -15.7 | 348 |
| bta-miR-496 | -15.6 | 482 |
| bta-miR-496 | -15.5 | 499 |
| bta-miR-496 | -15.4 | 72  |
| bta-miR-496 | -15.3 | 576 |
| bta-miR-496 | -14.6 | 408 |
| bta-miR-496 | -14.4 | 126 |
| bta-miR-496 | -14.4 | 265 |
| bta-miR-496 | -13.6 | 370 |
| bta-miR-496 | -13.5 | 101 |
| bta-miR-496 | -13.2 | 737 |
| bta-miR-496 | -13.2 | 450 |
| bta-miR-496 | -13.1 | 545 |
| bta-miR-496 | -13.0 | 424 |
| bta-miR-496 | -12.8 | 155 |
| bta-miR-496 | -12.4 | 51  |
| bta-miR-496 | -12.2 | 23  |
| bta-miR-496 | -12.1 | 598 |
| bta-miR-496 | -11.8 | 176 |
| bta-miR-496 | -11.7 | 38  |
| bta-miR-496 | -11.7 | 563 |
| bta-miR-496 | -10.8 | 1   |
| bta-miR-496 | -10.8 | 523 |
| bta-miR-496 | -10.6 | 292 |
| bta-miR-496 | -10.4 | 119 |
| bta-miR-496 | -10.1 | 429 |
| bta-miR-496 | -10.1 | 698 |
| bta-miR-500 | -30.1 | 161 |
| bta-miR-500 | -29.0 | 55  |
| bta-miR-500 | -26.0 | 578 |
| bta-miR-500 | -21.7 | 259 |
| bta-miR-500 | -20.9 | 396 |
| bta-miR-500 | -20.3 | 429 |
| bta-miR-500 | -20.3 | 5   |
| bta-miR-500 | -20.0 | 473 |
| bta-miR-500 | -18.5 | 211 |
| bta-miR-500 | -18.3 | 616 |
| bta-miR-500 | -17.6 | 109 |
| bta-miR-500 | -17.4 | 364 |
| bta-miR-500 | -17.1 | 186 |

|              |       |     |
|--------------|-------|-----|
| bta-miR-500  | -16.0 | 30  |
| bta-miR-500  | -15.5 | 139 |
| bta-miR-500  | -14.4 | 694 |
| bta-miR-500  | -14.3 | 657 |
| bta-miR-500  | -14.2 | 236 |
| bta-miR-500  | -14.0 | 73  |
| bta-miR-500  | -13.8 | 317 |
| bta-miR-500  | -13.2 | 459 |
| bta-miR-500  | -13.1 | 326 |
| bta-miR-500  | -12.8 | 514 |
| bta-miR-500  | -12.3 | 567 |
| bta-miR-500  | -12.2 | 132 |
| bta-miR-500  | -11.6 | 739 |
| bta-miR-500  | -11.5 | 92  |
| bta-miR-500  | -10.7 | 540 |
| bta-miR-500  | -10.3 | 121 |
| bta-miR-500  | -10.2 | 330 |
| bta-miR-502a | -25.0 | 1   |
| bta-miR-502a | -22.9 | 356 |
| bta-miR-502a | -22.2 | 498 |
| bta-miR-502a | -21.9 | 93  |
| bta-miR-502a | -21.9 | 464 |
| bta-miR-502a | -21.0 | 580 |
| bta-miR-502a | -20.9 | 233 |
| bta-miR-502a | -19.6 | 27  |
| bta-miR-502a | -19.5 | 404 |
| bta-miR-502a | -18.9 | 163 |
| bta-miR-502a | -18.5 | 187 |
| bta-miR-502a | -18.1 | 616 |
| bta-miR-502a | -17.7 | 258 |
| bta-miR-502a | -17.4 | 54  |
| bta-miR-502a | -17.2 | 426 |
| bta-miR-502a | -15.8 | 276 |
| bta-miR-502a | -15.6 | 313 |
| bta-miR-502a | -15.3 | 635 |
| bta-miR-502a | -15.1 | 209 |
| bta-miR-502a | -14.9 | 730 |
| bta-miR-502a | -14.9 | 130 |
| bta-miR-502a | -14.7 | 566 |
| bta-miR-502a | -14.6 | 537 |
| bta-miR-502a | -13.9 | 686 |
| bta-miR-502a | -13.9 | 660 |
| bta-miR-502a | -13.1 | 550 |
| bta-miR-502a | -12.2 | 293 |
| bta-miR-502a | -11.9 | 389 |
| bta-miR-502a | -11.8 | 711 |
| bta-miR-502a | -11.3 | 328 |
| bta-miR-502a | -11.1 | 81  |
| bta-miR-502a | -10.6 | 337 |
| bta-miR-502a | -10.3 | 453 |
| bta-miR-502b | -23.1 | 163 |
| bta-miR-502b | -22.5 | 401 |
| bta-miR-502b | -22.0 | 89  |
| bta-miR-502b | -21.5 | 426 |
| bta-miR-502b | -21.0 | 580 |
| bta-miR-502b | -20.6 | 248 |
| bta-miR-502b | -20.1 | 2   |
| bta-miR-502b | -19.4 | 467 |
| bta-miR-502b | -19.0 | 360 |

|              |       |     |
|--------------|-------|-----|
| bta-miR-502b | -18.5 | 208 |
| bta-miR-502b | -18.3 | 54  |
| bta-miR-502b | -17.7 | 689 |
| bta-miR-502b | -17.0 | 30  |
| bta-miR-502b | -16.7 | 616 |
| bta-miR-502b | -16.6 | 624 |
| bta-miR-502b | -16.2 | 514 |
| bta-miR-502b | -15.3 | 73  |
| bta-miR-502b | -14.8 | 235 |
| bta-miR-502b | -14.7 | 566 |
| bta-miR-502b | -13.9 | 313 |
| bta-miR-502b | -13.6 | 276 |
| bta-miR-502b | -13.5 | 665 |
| bta-miR-502b | -12.8 | 188 |
| bta-miR-502b | -12.7 | 130 |
| bta-miR-502b | -12.2 | 307 |
| bta-miR-502b | -12.2 | 118 |
| bta-miR-502b | -12.0 | 19  |
| bta-miR-502b | -11.9 | 389 |
| bta-miR-502b | -11.5 | 537 |
| bta-miR-502b | -11.4 | 289 |
| bta-miR-502b | -11.3 | 328 |
| bta-miR-502b | -11.2 | 715 |
| bta-miR-502b | -10.7 | 337 |
| bta-miR-502b | -10.6 | 550 |
| bta-miR-502b | -10.6 | 744 |
| bta-miR-504  | -29.1 | 615 |
| bta-miR-504  | -28.7 | 352 |
| bta-miR-504  | -22.9 | 559 |
| bta-miR-504  | -21.9 | 410 |
| bta-miR-504  | -21.8 | 66  |
| bta-miR-504  | -21.7 | 1   |
| bta-miR-504  | -21.6 | 100 |
| bta-miR-504  | -21.3 | 595 |
| bta-miR-504  | -20.6 | 372 |
| bta-miR-504  | -20.2 | 199 |
| bta-miR-504  | -20.0 | 265 |
| bta-miR-504  | -20.0 | 229 |
| bta-miR-504  | -19.1 | 480 |
| bta-miR-504  | -18.8 | 429 |
| bta-miR-504  | -18.0 | 654 |
| bta-miR-504  | -17.6 | 165 |
| bta-miR-504  | -17.4 | 517 |
| bta-miR-504  | -16.8 | 22  |
| bta-miR-504  | -16.6 | 451 |
| bta-miR-504  | -15.0 | 730 |
| bta-miR-504  | -14.1 | 584 |
| bta-miR-504  | -13.8 | 118 |
| bta-miR-504  | -12.6 | 185 |
| bta-miR-504  | -11.1 | 154 |
| bta-miR-504  | -10.7 | 697 |
| bta-miR-504  | -10.5 | 538 |
| bta-miR-505  | -27.5 | 598 |
| bta-miR-505  | -24.6 | 479 |
| bta-miR-505  | -23.6 | 68  |
| bta-miR-505  | -22.0 | 405 |
| bta-miR-505  | -21.2 | 506 |
| bta-miR-505  | -20.3 | 169 |
| bta-miR-505  | -20.2 | 366 |

|             |       |     |
|-------------|-------|-----|
| bta-miR-505 | -19.8 | 114 |
| bta-miR-505 | -18.7 | 232 |
| bta-miR-505 | -18.2 | 575 |
| bta-miR-505 | -18.1 | 631 |
| bta-miR-505 | -17.0 | 11  |
| bta-miR-505 | -16.1 | 28  |
| bta-miR-505 | -16.1 | 338 |
| bta-miR-505 | -15.7 | 453 |
| bta-miR-505 | -14.3 | 269 |
| bta-miR-505 | -14.0 | 426 |
| bta-miR-505 | -12.5 | 102 |
| bta-miR-505 | -12.1 | 49  |
| bta-miR-505 | -11.9 | 197 |
| bta-miR-505 | -11.9 | 558 |
| bta-miR-505 | -11.5 | 539 |
| bta-miR-505 | -11.4 | 663 |
| bta-miR-505 | -11.2 | 737 |
| bta-miR-505 | -10.1 | 710 |
| bta-miR-505 | -10.0 | 88  |
| bta-miR-539 | -24.7 | 568 |
| bta-miR-539 | -21.8 | 602 |
| bta-miR-539 | -21.0 | 167 |
| bta-miR-539 | -19.2 | 381 |
| bta-miR-539 | -18.1 | 271 |
| bta-miR-539 | -16.9 | 654 |
| bta-miR-539 | -16.5 | 630 |
| bta-miR-539 | -16.5 | 206 |
| bta-miR-539 | -16.0 | 488 |
| bta-miR-539 | -15.9 | 122 |
| bta-miR-539 | -15.2 | 425 |
| bta-miR-539 | -15.0 | 64  |
| bta-miR-539 | -14.8 | 364 |
| bta-miR-539 | -14.7 | 30  |
| bta-miR-539 | -14.1 | 473 |
| bta-miR-539 | -13.9 | 148 |
| bta-miR-539 | -13.9 | 408 |
| bta-miR-539 | -13.6 | 304 |
| bta-miR-539 | -13.4 | 702 |
| bta-miR-539 | -13.3 | 593 |
| bta-miR-539 | -13.0 | 10  |
| bta-miR-539 | -12.6 | 106 |
| bta-miR-539 | -11.9 | 244 |
| bta-miR-539 | -11.3 | 160 |
| bta-miR-539 | -10.8 | 326 |
| bta-miR-541 | -33.7 | 11  |
| bta-miR-541 | -32.4 | 414 |
| bta-miR-541 | -25.3 | 575 |
| bta-miR-541 | -25.2 | 84  |
| bta-miR-541 | -24.1 | 481 |
| bta-miR-541 | -23.7 | 269 |
| bta-miR-541 | -22.4 | 154 |
| bta-miR-541 | -21.8 | 449 |
| bta-miR-541 | -21.6 | 369 |
| bta-miR-541 | -21.4 | 109 |
| bta-miR-541 | -21.3 | 622 |
| bta-miR-541 | -20.9 | 219 |
| bta-miR-541 | -20.9 | 308 |
| bta-miR-541 | -18.5 | 344 |
| bta-miR-541 | -17.8 | 539 |

|              |       |     |
|--------------|-------|-----|
| bta-miR-541  | -17.8 | 38  |
| bta-miR-541  | -17.4 | 654 |
| bta-miR-541  | -16.0 | 518 |
| bta-miR-541  | -15.7 | 604 |
| bta-miR-541  | -15.2 | 177 |
| bta-miR-541  | -14.6 | 389 |
| bta-miR-541  | -14.3 | 59  |
| bta-miR-541  | -14.0 | 687 |
| bta-miR-541  | -14.0 | 132 |
| bta-miR-541  | -13.9 | 737 |
| bta-miR-541  | -13.7 | 708 |
| bta-miR-541  | -13.5 | 257 |
| bta-miR-541  | -11.6 | 142 |
| bta-miR-541  | -10.7 | 199 |
| bta-miR-541  | -10.6 | 1   |
| bta-miR-541  | -10.5 | 566 |
| bta-miR-541  | -10.4 | 330 |
| bta-miR-543  | -20.8 | 506 |
| bta-miR-543  | -19.4 | 16  |
| bta-miR-543  | -19.2 | 350 |
| bta-miR-543  | -19.0 | 574 |
| bta-miR-543  | -18.4 | 654 |
| bta-miR-543  | -17.4 | 613 |
| bta-miR-543  | -17.0 | 167 |
| bta-miR-543  | -17.0 | 450 |
| bta-miR-543  | -16.8 | 68  |
| bta-miR-543  | -16.8 | 479 |
| bta-miR-543  | -15.6 | 544 |
| bta-miR-543  | -14.7 | 279 |
| bta-miR-543  | -14.3 | 232 |
| bta-miR-543  | -14.2 | 113 |
| bta-miR-543  | -14.2 | 405 |
| bta-miR-543  | -14.0 | 36  |
| bta-miR-543  | -14.0 | 560 |
| bta-miR-543  | -13.0 | 380 |
| bta-miR-543  | -12.6 | 197 |
| bta-miR-543  | -12.4 | 429 |
| bta-miR-543  | -11.8 | 341 |
| bta-miR-543  | -11.6 | 736 |
| bta-miR-543  | -10.8 | 265 |
| bta-miR-543  | -10.6 | 326 |
| bta-miR-543  | -10.4 | 178 |
| bta-miR-543  | -10.1 | 218 |
| bta-miR-543  | -10.0 | 153 |
| bta-miR-544b | -16.4 | 434 |
| bta-miR-544b | -16.0 | 600 |
| bta-miR-544b | -14.8 | 84  |
| bta-miR-544b | -14.2 | 2   |
| bta-miR-544b | -14.2 | 184 |
| bta-miR-544b | -13.8 | 455 |
| bta-miR-544b | -13.4 | 231 |
| bta-miR-544b | -13.4 | 345 |
| bta-miR-544b | -13.2 | 249 |
| bta-miR-544b | -12.7 | 281 |
| bta-miR-544b | -12.6 | 66  |
| bta-miR-544b | -12.5 | 500 |
| bta-miR-544b | -12.3 | 371 |
| bta-miR-544b | -12.2 | 653 |
| bta-miR-544b | -11.7 | 546 |

|              |       |     |
|--------------|-------|-----|
| bta-miR-544b | -11.7 | 570 |
| bta-miR-544b | -11.5 | 414 |
| bta-miR-544b | -11.1 | 701 |
| bta-miR-544b | -10.7 | 627 |
| bta-miR-544b | -10.4 | 114 |
| bta-miR-544a | -19.7 | 178 |
| bta-miR-544a | -17.6 | 414 |
| bta-miR-544a | -17.3 | 71  |
| bta-miR-544a | -17.3 | 585 |
| bta-miR-544a | -17.2 | 13  |
| bta-miR-544a | -15.0 | 695 |
| bta-miR-544a | -14.5 | 508 |
| bta-miR-544a | -14.1 | 249 |
| bta-miR-544a | -13.4 | 546 |
| bta-miR-544a | -13.4 | 642 |
| bta-miR-544a | -13.0 | 281 |
| bta-miR-544a | -13.0 | 213 |
| bta-miR-544a | -12.9 | 481 |
| bta-miR-544a | -12.6 | 371 |
| bta-miR-544a | -12.5 | 437 |
| bta-miR-544a | -12.5 | 738 |
| bta-miR-544a | -12.4 | 114 |
| bta-miR-544a | -11.9 | 57  |
| bta-miR-544a | -11.9 | 345 |
| bta-miR-544a | -11.9 | 229 |
| bta-miR-544a | -11.8 | 614 |
| bta-miR-544a | -10.7 | 156 |
| bta-miR-544a | -10.5 | 624 |
| bta-miR-544a | -10.2 | 657 |
| bta-miR-544a | -10.0 | 455 |
| bta-miR-551a | -24.5 | 478 |
| bta-miR-551a | -24.1 | 598 |
| bta-miR-551a | -22.1 | 220 |
| bta-miR-551a | -22.0 | 405 |
| bta-miR-551a | -21.9 | 69  |
| bta-miR-551a | -21.1 | 25  |
| bta-miR-551a | -19.1 | 629 |
| bta-miR-551a | -17.9 | 570 |
| bta-miR-551a | -17.8 | 731 |
| bta-miR-551a | -17.7 | 439 |
| bta-miR-551a | -17.0 | 9   |
| bta-miR-551a | -16.6 | 102 |
| bta-miR-551a | -16.2 | 338 |
| bta-miR-551a | -15.4 | 270 |
| bta-miR-551a | -14.6 | 166 |
| bta-miR-551a | -14.0 | 366 |
| bta-miR-551a | -12.4 | 508 |
| bta-miR-551a | -11.8 | 464 |
| bta-miR-551a | -11.3 | 124 |
| bta-miR-551a | -11.1 | 697 |
| bta-miR-551a | -10.8 | 240 |
| bta-miR-551a | -10.6 | 49  |
| bta-miR-551a | -10.3 | 542 |
| bta-miR-551a | -10.2 | 197 |
| bta-miR-551a | -10.1 | 621 |
| bta-miR-551b | -29.8 | 403 |
| bta-miR-551b | -25.1 | 27  |
| bta-miR-551b | -23.6 | 644 |
| bta-miR-551b | -23.2 | 92  |

|              |       |     |
|--------------|-------|-----|
| bta-miR-551b | -22.2 | 591 |
| bta-miR-551b | -21.9 | 454 |
| bta-miR-551b | -20.8 | 216 |
| bta-miR-551b | -20.5 | 70  |
| bta-miR-551b | -20.2 | 337 |
| bta-miR-551b | -19.7 | 730 |
| bta-miR-551b | -19.3 | 6   |
| bta-miR-551b | -18.5 | 561 |
| bta-miR-551b | -17.7 | 369 |
| bta-miR-551b | -17.4 | 507 |
| bta-miR-551b | -16.2 | 166 |
| bta-miR-551b | -15.0 | 257 |
| bta-miR-551b | -14.6 | 432 |
| bta-miR-551b | -13.4 | 280 |
| bta-miR-551b | -12.8 | 543 |
| bta-miR-551b | -12.4 | 124 |
| bta-miR-551b | -12.1 | 697 |
| bta-miR-551b | -11.6 | 629 |
| bta-miR-551b | -11.1 | 486 |
| bta-miR-551b | -10.9 | 187 |
| bta-miR-562  | -19.7 | 78  |
| bta-miR-562  | -18.9 | 265 |
| bta-miR-562  | -17.2 | 616 |
| bta-miR-562  | -16.9 | 497 |
| bta-miR-562  | -16.7 | 555 |
| bta-miR-562  | -16.3 | 411 |
| bta-miR-562  | -16.1 | 727 |
| bta-miR-562  | -16.0 | 176 |
| bta-miR-562  | -15.7 | 444 |
| bta-miR-562  | -15.3 | 375 |
| bta-miR-562  | -15.2 | 106 |
| bta-miR-562  | -14.4 | 228 |
| bta-miR-562  | -13.4 | 66  |
| bta-miR-562  | -13.0 | 661 |
| bta-miR-562  | -12.9 | 15  |
| bta-miR-562  | -12.8 | 599 |
| bta-miR-562  | -12.7 | 478 |
| bta-miR-562  | -12.6 | 524 |
| bta-miR-562  | -12.6 | 576 |
| bta-miR-562  | -12.4 | 355 |
| bta-miR-562  | -12.4 | 40  |
| bta-miR-562  | -12.0 | 199 |
| bta-miR-562  | -11.6 | 423 |
| bta-miR-562  | -11.5 | 165 |
| bta-miR-562  | -11.3 | 464 |
| bta-miR-562  | -11.3 | 632 |
| bta-miR-562  | -10.4 | 433 |
| bta-miR-568  | -16.8 | 543 |
| bta-miR-568  | -14.8 | 524 |
| bta-miR-568  | -14.6 | 15  |
| bta-miR-568  | -14.1 | 377 |
| bta-miR-568  | -12.2 | 658 |
| bta-miR-568  | -11.5 | 488 |
| bta-miR-568  | -11.3 | 266 |
| bta-miR-568  | -10.6 | 583 |
| bta-miR-568  | -10.5 | 353 |
| bta-miR-568  | -10.3 | 293 |
| bta-miR-582  | -23.0 | 411 |
| bta-miR-582  | -22.2 | 12  |



|             |       |     |
|-------------|-------|-----|
| bta-miR-582 | -20.6 | 358 |
| bta-miR-582 | -17.8 | 63  |
| bta-miR-582 | -17.7 | 738 |
| bta-miR-582 | -16.7 | 448 |
| bta-miR-582 | -16.3 | 658 |
| bta-miR-582 | -15.9 | 472 |
| bta-miR-582 | -15.5 | 632 |
| bta-miR-582 | -15.2 | 555 |
| bta-miR-582 | -14.8 | 171 |
| bta-miR-582 | -12.9 | 598 |
| bta-miR-582 | -12.5 | 274 |
| bta-miR-582 | -12.5 | 112 |
| bta-miR-582 | -12.4 | 340 |
| bta-miR-582 | -11.9 | 204 |
| bta-miR-582 | -11.5 | 37  |
| bta-miR-582 | -11.5 | 700 |
| bta-miR-582 | -11.4 | 517 |
| bta-miR-582 | -10.5 | 381 |
| bta-miR-582 | -10.4 | 434 |
| bta-miR-582 | -10.2 | 504 |
| bta-miR-582 | -10.0 | 730 |
| bta-miR-584 | -26.5 | 107 |
| bta-miR-584 | -25.3 | 258 |
| bta-miR-584 | -21.3 | 463 |
| bta-miR-584 | -21.0 | 410 |
| bta-miR-584 | -20.3 | 9   |
| bta-miR-584 | -20.2 | 597 |
| bta-miR-584 | -19.9 | 165 |
| bta-miR-584 | -19.7 | 623 |
| bta-miR-584 | -18.4 | 137 |
| bta-miR-584 | -18.3 | 33  |
| bta-miR-584 | -18.2 | 234 |
| bta-miR-584 | -17.0 | 503 |
| bta-miR-584 | -16.7 | 655 |
| bta-miR-584 | -16.6 | 576 |
| bta-miR-584 | -16.5 | 356 |
| bta-miR-584 | -16.3 | 60  |
| bta-miR-584 | -15.5 | 386 |
| bta-miR-584 | -15.2 | 326 |
| bta-miR-584 | -15.0 | 211 |
| bta-miR-584 | -15.0 | 182 |
| bta-miR-584 | -14.6 | 545 |
| bta-miR-584 | -14.3 | 80  |
| bta-miR-584 | -14.1 | 432 |
| bta-miR-584 | -13.2 | 123 |
| bta-miR-584 | -12.4 | 639 |
| bta-miR-584 | -12.4 | 692 |
| bta-miR-584 | -12.4 | 566 |
| bta-miR-584 | -11.5 | 737 |
| bta-miR-584 | -11.4 | 98  |
| bta-miR-584 | -11.2 | 310 |
| bta-miR-584 | -10.7 | 282 |
| bta-miR-584 | -10.4 | 247 |
| bta-miR-592 | -15.4 | 353 |
| bta-miR-592 | -15.4 | 8   |
| bta-miR-592 | -15.4 | 383 |
| bta-miR-592 | -15.3 | 649 |
| bta-miR-592 | -15.2 | 577 |
| bta-miR-592 | -15.1 | 53  |

|             |       |     |
|-------------|-------|-----|
| bta-miR-592 | -14.5 | 271 |
| bta-miR-592 | -14.5 | 488 |
| bta-miR-592 | -13.6 | 535 |
| bta-miR-592 | -13.5 | 516 |
| bta-miR-592 | -13.1 | 206 |
| bta-miR-592 | -13.1 | 618 |
| bta-miR-592 | -12.0 | 106 |
| bta-miR-592 | -11.7 | 565 |
| bta-miR-592 | -11.2 | 428 |
| bta-miR-592 | -11.2 | 144 |
| bta-miR-592 | -10.5 | 180 |
| bta-miR-592 | -10.4 | 738 |
| bta-miR-592 | -10.3 | 469 |
| bta-miR-599 | -17.7 | 113 |
| bta-miR-599 | -17.5 | 344 |
| bta-miR-599 | -15.9 | 404 |
| bta-miR-599 | -15.2 | 551 |
| bta-miR-599 | -14.7 | 591 |
| bta-miR-599 | -14.7 | 178 |
| bta-miR-599 | -13.5 | 93  |
| bta-miR-599 | -13.0 | 376 |
| bta-miR-599 | -12.6 | 154 |
| bta-miR-599 | -12.2 | 7   |
| bta-miR-599 | -12.1 | 730 |
| bta-miR-599 | -11.6 | 39  |
| bta-miR-599 | -11.5 | 267 |
| bta-miR-599 | -11.4 | 642 |
| bta-miR-599 | -11.1 | 629 |
| bta-miR-599 | -10.8 | 504 |
| bta-miR-599 | -10.8 | 437 |
| bta-miR-599 | -10.6 | 217 |
| bta-miR-599 | -10.2 | 695 |
| bta-miR-599 | -10.0 | 662 |
| bta-miR-615 | -31.1 | 460 |
| bta-miR-615 | -29.8 | 4   |
| bta-miR-615 | -29.4 | 592 |
| bta-miR-615 | -28.4 | 60  |
| bta-miR-615 | -28.3 | 97  |
| bta-miR-615 | -26.9 | 401 |
| bta-miR-615 | -25.9 | 215 |
| bta-miR-615 | -25.5 | 311 |
| bta-miR-615 | -24.7 | 168 |
| bta-miR-615 | -24.4 | 344 |
| bta-miR-615 | -23.9 | 258 |
| bta-miR-615 | -22.1 | 490 |
| bta-miR-615 | -22.1 | 566 |
| bta-miR-615 | -20.5 | 432 |
| bta-miR-615 | -19.7 | 650 |
| bta-miR-615 | -18.7 | 631 |
| bta-miR-615 | -18.4 | 692 |
| bta-miR-615 | -18.0 | 80  |
| bta-miR-615 | -17.9 | 140 |
| bta-miR-615 | -16.9 | 194 |
| bta-miR-615 | -15.2 | 739 |
| bta-miR-615 | -14.0 | 367 |
| bta-miR-615 | -13.8 | 515 |
| bta-miR-615 | -13.0 | 280 |
| bta-miR-615 | -12.9 | 378 |
| bta-miR-615 | -12.2 | 37  |

|             |       |     |
|-------------|-------|-----|
| bta-miR-615 | -12.0 | 551 |
| bta-miR-615 | -10.8 | 584 |
| bta-miR-615 | -10.2 | 291 |
| bta-miR-628 | -19.3 | 474 |
| bta-miR-628 | -18.0 | 261 |
| bta-miR-628 | -17.5 | 625 |
| bta-miR-628 | -16.2 | 14  |
| bta-miR-628 | -15.6 | 363 |
| bta-miR-628 | -15.4 | 32  |
| bta-miR-628 | -15.3 | 512 |
| bta-miR-628 | -15.2 | 74  |
| bta-miR-628 | -14.4 | 390 |
| bta-miR-628 | -14.3 | 190 |
| bta-miR-628 | -13.6 | 210 |
| bta-miR-628 | -13.5 | 58  |
| bta-miR-628 | -12.7 | 533 |
| bta-miR-628 | -12.5 | 110 |
| bta-miR-628 | -12.3 | 578 |
| bta-miR-628 | -11.8 | 7   |
| bta-miR-628 | -11.6 | 169 |
| bta-miR-628 | -11.4 | 284 |
| bta-miR-628 | -11.1 | 681 |
| bta-miR-628 | -10.7 | 496 |
| bta-miR-628 | -10.6 | 95  |
| bta-miR-628 | -10.3 | 416 |
| bta-miR-628 | -10.1 | 716 |
| bta-miR-631 | -29.0 | 560 |
| bta-miR-631 | -25.1 | 403 |
| bta-miR-631 | -23.8 | 66  |
| bta-miR-631 | -23.0 | 615 |
| bta-miR-631 | -22.8 | 13  |
| bta-miR-631 | -22.2 | 448 |
| bta-miR-631 | -20.8 | 112 |
| bta-miR-631 | -19.9 | 477 |
| bta-miR-631 | -19.5 | 216 |
| bta-miR-631 | -18.9 | 660 |
| bta-miR-631 | -18.3 | 267 |
| bta-miR-631 | -18.2 | 586 |
| bta-miR-631 | -17.5 | 154 |
| bta-miR-631 | -16.8 | 356 |
| bta-miR-631 | -15.1 | 432 |
| bta-miR-631 | -15.1 | 185 |
| bta-miR-631 | -14.3 | 92  |
| bta-miR-631 | -14.3 | 49  |
| bta-miR-631 | -13.6 | 386 |
| bta-miR-631 | -13.3 | 504 |
| bta-miR-631 | -13.1 | 650 |
| bta-miR-631 | -12.5 | 242 |
| bta-miR-631 | -12.5 | 730 |
| bta-miR-631 | -12.0 | 337 |
| bta-miR-631 | -11.4 | 685 |
| bta-miR-631 | -11.2 | 1   |
| bta-miR-631 | -11.0 | 281 |
| bta-miR-631 | -10.7 | 471 |
| bta-miR-631 | -10.3 | 634 |
| bta-miR-631 | -10.1 | 294 |
| bta-miR-653 | -18.4 | 605 |
| bta-miR-653 | -17.2 | 64  |
| bta-miR-653 | -16.6 | 198 |

|             |       |     |
|-------------|-------|-----|
| bta-miR-653 | -15.3 | 170 |
| bta-miR-653 | -15.1 | 238 |
| bta-miR-653 | -14.0 | 366 |
| bta-miR-653 | -13.6 | 1   |
| bta-miR-653 | -13.3 | 280 |
| bta-miR-653 | -13.2 | 439 |
| bta-miR-653 | -12.2 | 219 |
| bta-miR-653 | -12.0 | 635 |
| bta-miR-653 | -11.9 | 105 |
| bta-miR-653 | -11.6 | 340 |
| bta-miR-653 | -11.4 | 494 |
| bta-miR-653 | -11.3 | 28  |
| bta-miR-653 | -11.2 | 570 |
| bta-miR-653 | -10.9 | 80  |
| bta-miR-653 | -10.8 | 516 |
| bta-miR-653 | -10.7 | 229 |
| bta-miR-653 | -10.4 | 738 |
| bta-miR-653 | -10.4 | 410 |
| bta-miR-653 | -10.1 | 158 |
| bta-miR-653 | -10.1 | 548 |
| bta-miR-654 | -25.4 | 615 |
| bta-miR-654 | -20.5 | 11  |
| bta-miR-654 | -19.3 | 174 |
| bta-miR-654 | -18.6 | 574 |
| bta-miR-654 | -18.0 | 478 |
| bta-miR-654 | -17.5 | 218 |
| bta-miR-654 | -16.5 | 36  |
| bta-miR-654 | -16.4 | 83  |
| bta-miR-654 | -16.3 | 406 |
| bta-miR-654 | -15.1 | 337 |
| bta-miR-654 | -14.9 | 266 |
| bta-miR-654 | -14.7 | 64  |
| bta-miR-654 | -14.6 | 659 |
| bta-miR-654 | -14.6 | 198 |
| bta-miR-654 | -14.3 | 448 |
| bta-miR-654 | -14.0 | 365 |
| bta-miR-654 | -12.7 | 125 |
| bta-miR-654 | -12.7 | 738 |
| bta-miR-654 | -12.1 | 546 |
| bta-miR-654 | -11.8 | 153 |
| bta-miR-654 | -11.7 | 1   |
| bta-miR-654 | -10.5 | 500 |
| bta-miR-655 | -19.1 | 12  |
| bta-miR-655 | -18.8 | 449 |
| bta-miR-655 | -16.5 | 613 |
| bta-miR-655 | -16.0 | 499 |
| bta-miR-655 | -15.7 | 659 |
| bta-miR-655 | -15.5 | 418 |
| bta-miR-655 | -15.3 | 239 |
| bta-miR-655 | -15.1 | 348 |
| bta-miR-655 | -15.0 | 80  |
| bta-miR-655 | -14.9 | 174 |
| bta-miR-655 | -13.9 | 265 |
| bta-miR-655 | -13.9 | 737 |
| bta-miR-655 | -13.9 | 479 |
| bta-miR-655 | -13.8 | 37  |
| bta-miR-655 | -13.7 | 201 |
| bta-miR-655 | -13.6 | 575 |
| bta-miR-655 | -13.3 | 220 |

|             |       |     |
|-------------|-------|-----|
| bta-miR-655 | -12.9 | 440 |
| bta-miR-655 | -12.8 | 539 |
| bta-miR-655 | -12.5 | 645 |
| bta-miR-655 | -12.3 | 114 |
| bta-miR-655 | -12.1 | 407 |
| bta-miR-655 | -11.9 | 464 |
| bta-miR-655 | -11.5 | 65  |
| bta-miR-655 | -10.8 | 154 |
| bta-miR-655 | -10.8 | 280 |
| bta-miR-655 | -10.6 | 125 |
| bta-miR-655 | -10.6 | 340 |
| bta-miR-656 | -18.5 | 68  |
| bta-miR-656 | -17.8 | 614 |
| bta-miR-656 | -16.1 | 575 |
| bta-miR-656 | -15.4 | 411 |
| bta-miR-656 | -14.8 | 11  |
| bta-miR-656 | -14.3 | 174 |
| bta-miR-656 | -13.4 | 544 |
| bta-miR-656 | -13.3 | 447 |
| bta-miR-656 | -13.2 | 737 |
| bta-miR-656 | -12.9 | 496 |
| bta-miR-656 | -12.6 | 357 |
| bta-miR-656 | -12.4 | 654 |
| bta-miR-656 | -12.2 | 434 |
| bta-miR-656 | -11.9 | 280 |
| bta-miR-656 | -11.9 | 241 |
| bta-miR-656 | -11.5 | 218 |
| bta-miR-656 | -10.8 | 115 |
| bta-miR-656 | -10.7 | 2   |
| bta-miR-656 | -10.1 | 479 |
| bta-miR-656 | -10.0 | 28  |
| bta-miR-658 | -29.3 | 408 |
| bta-miR-658 | -28.7 | 563 |
| bta-miR-658 | -27.3 | 237 |
| bta-miR-658 | -26.7 | 483 |
| bta-miR-658 | -26.0 | 73  |
| bta-miR-658 | -25.9 | 169 |
| bta-miR-658 | -25.6 | 126 |
| bta-miR-658 | -25.4 | 34  |
| bta-miR-658 | -24.3 | 367 |
| bta-miR-658 | -24.3 | 454 |
| bta-miR-658 | -23.4 | 269 |
| bta-miR-658 | -22.5 | 669 |
| bta-miR-658 | -21.2 | 622 |
| bta-miR-658 | -20.3 | 311 |
| bta-miR-658 | -18.4 | 702 |
| bta-miR-658 | -18.2 | 9   |
| bta-miR-658 | -18.0 | 341 |
| bta-miR-658 | -17.1 | 156 |
| bta-miR-658 | -16.5 | 200 |
| bta-miR-658 | -15.0 | 391 |
| bta-miR-658 | -14.8 | 734 |
| bta-miR-658 | -13.7 | 595 |
| bta-miR-658 | -13.5 | 541 |
| bta-miR-658 | -12.0 | 649 |
| bta-miR-658 | -11.8 | 229 |
| bta-miR-665 | -28.0 | 418 |
| bta-miR-665 | -27.8 | 69  |
| bta-miR-665 | -26.4 | 613 |

|             |       |     |
|-------------|-------|-----|
| bta-miR-665 | -26.0 | 479 |
| bta-miR-665 | -22.2 | 448 |
| bta-miR-665 | -20.8 | 268 |
| bta-miR-665 | -20.5 | 506 |
| bta-miR-665 | -19.9 | 576 |
| bta-miR-665 | -19.8 | 12  |
| bta-miR-665 | -19.6 | 109 |
| bta-miR-665 | -18.1 | 175 |
| bta-miR-665 | -16.9 | 308 |
| bta-miR-665 | -16.7 | 395 |
| bta-miR-665 | -15.9 | 631 |
| bta-miR-665 | -15.3 | 41  |
| bta-miR-665 | -15.2 | 663 |
| bta-miR-665 | -14.9 | 361 |
| bta-miR-665 | -14.4 | 232 |
| bta-miR-665 | -13.6 | 559 |
| bta-miR-665 | -13.5 | 155 |
| bta-miR-665 | -13.1 | 739 |
| bta-miR-665 | -13.1 | 532 |
| bta-miR-665 | -13.1 | 599 |
| bta-miR-665 | -13.0 | 205 |
| bta-miR-665 | -12.5 | 473 |
| bta-miR-665 | -12.4 | 693 |
| bta-miR-665 | -11.5 | 126 |
| bta-miR-665 | -10.8 | 371 |
| bta-miR-665 | -10.5 | 261 |
| bta-miR-665 | -10.2 | 30  |
| bta-miR-670 | -23.6 | 53  |
| bta-miR-670 | -21.1 | 594 |
| bta-miR-670 | -20.4 | 161 |
| bta-miR-670 | -19.2 | 259 |
| bta-miR-670 | -18.1 | 483 |
| bta-miR-670 | -17.0 | 119 |
| bta-miR-670 | -17.0 | 295 |
| bta-miR-670 | -16.9 | 616 |
| bta-miR-670 | -16.1 | 88  |
| bta-miR-670 | -15.3 | 408 |
| bta-miR-670 | -15.1 | 207 |
| bta-miR-670 | -15.0 | 13  |
| bta-miR-670 | -14.8 | 431 |
| bta-miR-670 | -14.6 | 144 |
| bta-miR-670 | -14.4 | 461 |
| bta-miR-670 | -14.4 | 649 |
| bta-miR-670 | -13.7 | 365 |
| bta-miR-670 | -13.7 | 695 |
| bta-miR-670 | -13.4 | 569 |
| bta-miR-670 | -13.0 | 520 |
| bta-miR-670 | -12.1 | 73  |
| bta-miR-670 | -11.5 | 666 |
| bta-miR-670 | -11.1 | 382 |
| bta-miR-670 | -10.8 | 540 |
| bta-miR-670 | -10.7 | 181 |
| bta-miR-670 | -10.2 | 341 |
| bta-miR-670 | -10.1 | 740 |
| bta-miR-670 | -10.0 | 326 |
| bta-miR-671 | -33.4 | 391 |
| bta-miR-671 | -31.2 | 461 |
| bta-miR-671 | -30.7 | 107 |
| bta-miR-671 | -30.1 | 248 |

|             |       |     |
|-------------|-------|-----|
| bta-miR-671 | -30.0 | 164 |
| bta-miR-671 | -29.0 | 45  |
| bta-miR-671 | -28.6 | 503 |
| bta-miR-671 | -26.2 | 564 |
| bta-miR-671 | -25.0 | 622 |
| bta-miR-671 | -24.2 | 132 |
| bta-miR-671 | -23.2 | 317 |
| bta-miR-671 | -21.0 | 80  |
| bta-miR-671 | -20.8 | 205 |
| bta-miR-671 | -20.6 | 27  |
| bta-miR-671 | -20.4 | 692 |
| bta-miR-671 | -19.4 | 361 |
| bta-miR-671 | -19.1 | 4   |
| bta-miR-671 | -18.6 | 596 |
| bta-miR-671 | -18.4 | 653 |
| bta-miR-671 | -18.3 | 429 |
| bta-miR-671 | -15.8 | 487 |
| bta-miR-671 | -13.6 | 299 |
| bta-miR-671 | -13.3 | 615 |
| bta-miR-671 | -13.1 | 669 |
| bta-miR-671 | -12.8 | 96  |
| bta-miR-671 | -12.7 | 740 |
| bta-miR-671 | -11.8 | 453 |
| bta-miR-671 | -11.5 | 125 |
| bta-miR-671 | -11.0 | 342 |
| bta-miR-671 | -10.8 | 533 |
| bta-miR-671 | -10.5 | 378 |
| bta-miR-708 | -26.6 | 12  |
| bta-miR-708 | -26.0 | 168 |
| bta-miR-708 | -22.7 | 262 |
| bta-miR-708 | -22.4 | 409 |
| bta-miR-708 | -22.4 | 609 |
| bta-miR-708 | -19.5 | 362 |
| bta-miR-708 | -19.5 | 545 |
| bta-miR-708 | -19.3 | 514 |
| bta-miR-708 | -19.0 | 198 |
| bta-miR-708 | -18.8 | 98  |
| bta-miR-708 | -18.1 | 34  |
| bta-miR-708 | -18.0 | 450 |
| bta-miR-708 | -17.9 | 72  |
| bta-miR-708 | -16.8 | 236 |
| bta-miR-708 | -16.0 | 495 |
| bta-miR-708 | -15.5 | 572 |
| bta-miR-708 | -15.4 | 650 |
| bta-miR-708 | -15.1 | 125 |
| bta-miR-708 | -15.1 | 692 |
| bta-miR-708 | -13.6 | 629 |
| bta-miR-708 | -13.5 | 474 |
| bta-miR-708 | -13.0 | 142 |
| bta-miR-708 | -12.3 | 737 |
| bta-miR-708 | -12.0 | 1   |
| bta-miR-708 | -12.0 | 583 |
| bta-miR-708 | -11.8 | 330 |
| bta-miR-708 | -10.1 | 62  |
| bta-miR-744 | -30.7 | 415 |
| bta-miR-744 | -28.0 | 13  |
| bta-miR-744 | -27.6 | 86  |
| bta-miR-744 | -26.8 | 457 |
| bta-miR-744 | -26.0 | 156 |

|             |       |     |
|-------------|-------|-----|
| bta-miR-744 | -24.7 | 234 |
| bta-miR-744 | -24.6 | 116 |
| bta-miR-744 | -23.4 | 547 |
| bta-miR-744 | -22.8 | 356 |
| bta-miR-744 | -22.6 | 380 |
| bta-miR-744 | -21.1 | 38  |
| bta-miR-744 | -21.1 | 185 |
| bta-miR-744 | -20.2 | 617 |
| bta-miR-744 | -19.8 | 493 |
| bta-miR-744 | -19.0 | 585 |
| bta-miR-744 | -18.9 | 250 |
| bta-miR-744 | -18.4 | 292 |
| bta-miR-744 | -17.8 | 654 |
| bta-miR-744 | -17.6 | 322 |
| bta-miR-744 | -17.6 | 66  |
| bta-miR-744 | -15.9 | 401 |
| bta-miR-744 | -15.3 | 568 |
| bta-miR-744 | -13.7 | 276 |
| bta-miR-744 | -13.6 | 737 |
| bta-miR-744 | -13.6 | 526 |
| bta-miR-744 | -13.4 | 697 |
| bta-miR-744 | -13.0 | 139 |
| bta-miR-744 | -11.1 | 209 |
| bta-miR-744 | -10.3 | 342 |
| bta-miR-744 | -10.2 | 4   |
| bta-miR-758 | -22.5 | 614 |
| bta-miR-758 | -21.4 | 411 |
| bta-miR-758 | -20.2 | 496 |
| bta-miR-758 | -20.1 | 38  |
| bta-miR-758 | -19.1 | 370 |
| bta-miR-758 | -19.1 | 265 |
| bta-miR-758 | -18.6 | 478 |
| bta-miR-758 | -18.5 | 80  |
| bta-miR-758 | -18.4 | 566 |
| bta-miR-758 | -18.1 | 113 |
| bta-miR-758 | -18.0 | 448 |
| bta-miR-758 | -17.7 | 599 |
| bta-miR-758 | -17.0 | 12  |
| bta-miR-758 | -15.7 | 228 |
| bta-miR-758 | -15.5 | 738 |
| bta-miR-758 | -14.0 | 661 |
| bta-miR-758 | -13.4 | 182 |
| bta-miR-758 | -13.3 | 62  |
| bta-miR-758 | -12.2 | 143 |
| bta-miR-758 | -12.1 | 126 |
| bta-miR-758 | -11.9 | 155 |
| bta-miR-758 | -11.8 | 341 |
| bta-miR-758 | -11.0 | 26  |
| bta-miR-758 | -10.7 | 709 |
| bta-miR-758 | -10.3 | 358 |
| bta-miR-758 | -10.2 | 252 |
| bta-miR-759 | -21.0 | 548 |
| bta-miR-759 | -19.4 | 8   |
| bta-miR-759 | -16.9 | 44  |
| bta-miR-759 | -15.8 | 485 |
| bta-miR-759 | -15.5 | 377 |
| bta-miR-759 | -15.3 | 651 |
| bta-miR-759 | -14.4 | 417 |
| bta-miR-759 | -14.2 | 332 |



|             |       |     |
|-------------|-------|-----|
| bta-miR-759 | -13.9 | 77  |
| bta-miR-759 | -13.3 | 529 |
| bta-miR-759 | -13.2 | 610 |
| bta-miR-759 | -13.1 | 252 |
| bta-miR-759 | -12.8 | 100 |
| bta-miR-759 | -12.6 | 199 |
| bta-miR-759 | -12.3 | 566 |
| bta-miR-759 | -12.1 | 684 |
| bta-miR-759 | -11.9 | 221 |
| bta-miR-759 | -11.9 | 277 |
| bta-miR-759 | -11.3 | 436 |
| bta-miR-759 | -10.9 | 519 |
| bta-miR-759 | -10.8 | 393 |
| bta-miR-759 | -10.7 | 736 |
| bta-miR-759 | -10.7 | 473 |
| bta-miR-759 | -10.3 | 628 |
| bta-miR-759 | -10.0 | 177 |
| bta-miR-760 | -29.1 | 609 |
| bta-miR-760 | -28.1 | 418 |
| bta-miR-760 | -25.9 | 481 |
| bta-miR-760 | -25.4 | 71  |
| bta-miR-760 | -21.3 | 12  |
| bta-miR-760 | -19.7 | 576 |
| bta-miR-760 | -18.1 | 155 |
| bta-miR-760 | -17.6 | 359 |
| bta-miR-760 | -17.0 | 211 |
| bta-miR-760 | -16.8 | 262 |
| bta-miR-760 | -15.6 | 114 |
| bta-miR-760 | -15.2 | 518 |
| bta-miR-760 | -14.3 | 654 |
| bta-miR-760 | -13.9 | 454 |
| bta-miR-760 | -13.2 | 740 |
| bta-miR-760 | -13.0 | 389 |
| bta-miR-760 | -12.9 | 539 |
| bta-miR-760 | -12.3 | 698 |
| bta-miR-760 | -12.2 | 39  |
| bta-miR-760 | -11.7 | 231 |
| bta-miR-760 | -10.4 | 89  |
| bta-miR-760 | -10.1 | 185 |
| bta-miR-760 | -10.0 | 190 |
| bta-miR-761 | -25.4 | 96  |
| bta-miR-761 | -24.8 | 42  |
| bta-miR-761 | -22.0 | 377 |
| bta-miR-761 | -21.7 | 7   |
| bta-miR-761 | -21.7 | 543 |
| bta-miR-761 | -20.9 | 658 |
| bta-miR-761 | -20.0 | 566 |
| bta-miR-761 | -19.8 | 412 |
| bta-miR-761 | -19.4 | 257 |
| bta-miR-761 | -18.5 | 356 |
| bta-miR-761 | -18.3 | 161 |
| bta-miR-761 | -17.3 | 463 |
| bta-miR-761 | -17.2 | 199 |
| bta-miR-761 | -16.4 | 235 |
| bta-miR-761 | -16.2 | 497 |
| bta-miR-761 | -15.3 | 614 |
| bta-miR-761 | -14.8 | 126 |
| bta-miR-761 | -14.5 | 69  |
| bta-miR-761 | -13.6 | 293 |

|             |       |     |
|-------------|-------|-----|
| bta-miR-761 | -13.6 | 739 |
| bta-miR-761 | -13.5 | 311 |
| bta-miR-761 | -13.3 | 326 |
| bta-miR-761 | -13.0 | 430 |
| bta-miR-761 | -12.9 | 146 |
| bta-miR-761 | -12.8 | 644 |
| bta-miR-761 | -12.5 | 174 |
| bta-miR-761 | -12.0 | 526 |
| bta-miR-761 | -11.8 | 594 |
| bta-miR-761 | -11.1 | 30  |
| bta-miR-761 | -10.0 | 137 |
| bta-miR-763 | -28.5 | 408 |
| bta-miR-763 | -27.5 | 457 |
| bta-miR-763 | -26.4 | 8   |
| bta-miR-763 | -26.1 | 563 |
| bta-miR-763 | -25.5 | 136 |
| bta-miR-763 | -24.9 | 504 |
| bta-miR-763 | -23.3 | 109 |
| bta-miR-763 | -22.9 | 244 |
| bta-miR-763 | -21.4 | 51  |
| bta-miR-763 | -21.0 | 185 |
| bta-miR-763 | -20.8 | 698 |
| bta-miR-763 | -19.5 | 86  |
| bta-miR-763 | -19.4 | 381 |
| bta-miR-763 | -18.6 | 624 |
| bta-miR-763 | -18.1 | 483 |
| bta-miR-763 | -17.9 | 308 |
| bta-miR-763 | -17.6 | 354 |
| bta-miR-763 | -17.1 | 207 |
| bta-miR-763 | -16.4 | 655 |
| bta-miR-763 | -15.2 | 275 |
| bta-miR-763 | -14.9 | 594 |
| bta-miR-763 | -14.6 | 534 |
| bta-miR-763 | -14.2 | 328 |
| bta-miR-763 | -14.1 | 231 |
| bta-miR-763 | -11.4 | 519 |
| bta-miR-763 | -10.9 | 616 |
| bta-miR-763 | -10.8 | 676 |
| bta-miR-763 | -10.0 | 551 |
| bta-miR-767 | -26.0 | 95  |
| bta-miR-767 | -24.7 | 18  |
| bta-miR-767 | -22.3 | 584 |
| bta-miR-767 | -21.8 | 359 |
| bta-miR-767 | -21.7 | 62  |
| bta-miR-767 | -21.2 | 488 |
| bta-miR-767 | -19.9 | 256 |
| bta-miR-767 | -18.9 | 462 |
| bta-miR-767 | -18.9 | 408 |
| bta-miR-767 | -18.8 | 562 |
| bta-miR-767 | -18.4 | 126 |
| bta-miR-767 | -18.2 | 618 |
| bta-miR-767 | -17.5 | 235 |
| bta-miR-767 | -16.5 | 156 |
| bta-miR-767 | -16.0 | 729 |
| bta-miR-767 | -15.9 | 644 |
| bta-miR-767 | -15.8 | 185 |
| bta-miR-767 | -15.3 | 436 |
| bta-miR-767 | -14.9 | 518 |
| bta-miR-767 | -14.9 | 305 |

|             |       |     |
|-------------|-------|-----|
| bta-miR-767 | -14.1 | 207 |
| bta-miR-767 | -14.0 | 3   |
| bta-miR-767 | -13.9 | 697 |
| bta-miR-767 | -13.3 | 388 |
| bta-miR-767 | -12.9 | 45  |
| bta-miR-767 | -12.8 | 344 |
| bta-miR-767 | -11.9 | 664 |
| bta-miR-767 | -10.4 | 293 |
| bta-miR-769 | -25.4 | 22  |
| bta-miR-769 | -23.8 | 605 |
| bta-miR-769 | -23.8 | 419 |
| bta-miR-769 | -23.3 | 464 |
| bta-miR-769 | -23.0 | 559 |
| bta-miR-769 | -21.3 | 262 |
| bta-miR-769 | -21.3 | 155 |
| bta-miR-769 | -21.3 | 65  |
| bta-miR-769 | -20.0 | 361 |
| bta-miR-769 | -19.9 | 198 |
| bta-miR-769 | -19.9 | 97  |
| bta-miR-769 | -18.7 | 586 |
| bta-miR-769 | -17.9 | 234 |
| bta-miR-769 | -17.8 | 125 |
| bta-miR-769 | -17.3 | 698 |
| bta-miR-769 | -16.1 | 504 |
| bta-miR-769 | -16.0 | 400 |
| bta-miR-769 | -15.4 | 9   |
| bta-miR-769 | -14.4 | 627 |
| bta-miR-769 | -14.2 | 645 |
| bta-miR-769 | -13.0 | 737 |
| bta-miR-769 | -12.8 | 299 |
| bta-miR-769 | -12.6 | 184 |
| bta-miR-769 | -12.5 | 344 |
| bta-miR-769 | -12.1 | 487 |
| bta-miR-769 | -11.8 | 454 |
| bta-miR-769 | -11.5 | 50  |
| bta-miR-769 | -10.3 | 327 |
| bta-miR-769 | -10.0 | 320 |
| bta-miR-769 | -10.0 | 532 |
| bta-miR-873 | -27.8 | 68  |
| bta-miR-873 | -23.1 | 348 |
| bta-miR-873 | -22.5 | 620 |
| bta-miR-873 | -22.4 | 268 |
| bta-miR-873 | -22.4 | 450 |
| bta-miR-873 | -20.8 | 479 |
| bta-miR-873 | -20.1 | 371 |
| bta-miR-873 | -19.6 | 570 |
| bta-miR-873 | -19.5 | 412 |
| bta-miR-873 | -18.6 | 114 |
| bta-miR-873 | -17.5 | 41  |
| bta-miR-873 | -17.0 | 219 |
| bta-miR-873 | -16.9 | 176 |
| bta-miR-873 | -16.7 | 598 |
| bta-miR-873 | -15.8 | 154 |
| bta-miR-873 | -15.4 | 506 |
| bta-miR-873 | -15.0 | 11  |
| bta-miR-873 | -14.9 | 737 |
| bta-miR-873 | -14.8 | 129 |
| bta-miR-873 | -14.1 | 702 |
| bta-miR-873 | -13.3 | 397 |

|             |       |     |
|-------------|-------|-----|
| bta-miR-873 | -12.7 | 308 |
| bta-miR-873 | -12.2 | 649 |
| bta-miR-873 | -12.1 | 544 |
| bta-miR-873 | -12.0 | 145 |
| bta-miR-873 | -12.0 | 239 |
| bta-miR-873 | -11.0 | 613 |
| bta-miR-873 | -10.3 | 680 |
| bta-miR-873 | -10.2 | 431 |
| bta-miR-874 | -30.5 | 258 |
| bta-miR-874 | -29.9 | 463 |
| bta-miR-874 | -29.5 | 576 |
| bta-miR-874 | -27.6 | 4   |
| bta-miR-874 | -27.1 | 395 |
| bta-miR-874 | -26.0 | 609 |
| bta-miR-874 | -24.1 | 39  |
| bta-miR-874 | -23.5 | 498 |
| bta-miR-874 | -22.8 | 422 |
| bta-miR-874 | -22.7 | 107 |
| bta-miR-874 | -19.7 | 165 |
| bta-miR-874 | -18.4 | 356 |
| bta-miR-874 | -18.0 | 625 |
| bta-miR-874 | -17.1 | 191 |
| bta-miR-874 | -16.4 | 233 |
| bta-miR-874 | -16.3 | 662 |
| bta-miR-874 | -16.1 | 87  |
| bta-miR-874 | -15.8 | 140 |
| bta-miR-874 | -15.4 | 307 |
| bta-miR-874 | -15.0 | 209 |
| bta-miR-874 | -13.8 | 545 |
| bta-miR-874 | -13.7 | 247 |
| bta-miR-874 | -13.3 | 708 |
| bta-miR-874 | -13.3 | 741 |
| bta-miR-874 | -13.2 | 639 |
| bta-miR-874 | -12.2 | 692 |
| bta-miR-874 | -11.8 | 323 |
| bta-miR-874 | -11.1 | 133 |
| bta-miR-874 | -10.4 | 27  |
| bta-miR-874 | -10.1 | 386 |
| bta-miR-875 | -21.1 | 5   |
| bta-miR-875 | -19.1 | 431 |
| bta-miR-875 | -18.6 | 594 |
| bta-miR-875 | -18.0 | 402 |
| bta-miR-875 | -17.2 | 473 |
| bta-miR-875 | -16.7 | 549 |
| bta-miR-875 | -16.5 | 183 |
| bta-miR-875 | -16.0 | 210 |
| bta-miR-875 | -16.0 | 161 |
| bta-miR-875 | -15.9 | 60  |
| bta-miR-875 | -15.8 | 341 |
| bta-miR-875 | -15.5 | 363 |
| bta-miR-875 | -15.5 | 581 |
| bta-miR-875 | -15.3 | 91  |
| bta-miR-875 | -15.2 | 621 |
| bta-miR-875 | -14.6 | 489 |
| bta-miR-875 | -14.0 | 23  |
| bta-miR-875 | -14.0 | 261 |
| bta-miR-875 | -13.7 | 73  |
| bta-miR-875 | -13.5 | 510 |
| bta-miR-875 | -13.3 | 730 |

|             |       |     |
|-------------|-------|-----|
| bta-miR-875 | -11.5 | 229 |
| bta-miR-875 | -11.2 | 425 |
| bta-miR-875 | -11.2 | 148 |
| bta-miR-875 | -11.1 | 452 |
| bta-miR-875 | -10.7 | 384 |
| bta-miR-875 | -10.6 | 308 |
| bta-miR-875 | -10.5 | 642 |
| bta-miR-876 | -18.7 | 185 |
| bta-miR-876 | -18.6 | 220 |
| bta-miR-876 | -17.6 | 497 |
| bta-miR-876 | -16.8 | 17  |
| bta-miR-876 | -16.4 | 40  |
| bta-miR-876 | -16.4 | 464 |
| bta-miR-876 | -16.1 | 598 |
| bta-miR-876 | -15.9 | 617 |
| bta-miR-876 | -15.7 | 172 |
| bta-miR-876 | -15.5 | 113 |
| bta-miR-876 | -14.8 | 377 |
| bta-miR-876 | -14.5 | 299 |
| bta-miR-876 | -14.4 | 704 |
| bta-miR-876 | -14.1 | 145 |
| bta-miR-876 | -14.1 | 543 |
| bta-miR-876 | -14.0 | 422 |
| bta-miR-876 | -13.7 | 266 |
| bta-miR-876 | -13.4 | 567 |
| bta-miR-876 | -13.4 | 337 |
| bta-miR-876 | -13.4 | 658 |
| bta-miR-876 | -12.3 | 730 |
| bta-miR-876 | -11.9 | 94  |
| bta-miR-876 | -11.4 | 400 |
| bta-miR-876 | -11.2 | 449 |
| bta-miR-876 | -10.4 | 239 |
| bta-miR-877 | -26.0 | 362 |
| bta-miR-877 | -25.8 | 561 |
| bta-miR-877 | -23.1 | 33  |
| bta-miR-877 | -22.4 | 110 |
| bta-miR-877 | -22.3 | 461 |
| bta-miR-877 | -21.2 | 248 |
| bta-miR-877 | -21.1 | 168 |
| bta-miR-877 | -20.7 | 401 |
| bta-miR-877 | -18.1 | 206 |
| bta-miR-877 | -17.8 | 502 |
| bta-miR-877 | -17.8 | 692 |
| bta-miR-877 | -17.3 | 626 |
| bta-miR-877 | -17.2 | 668 |
| bta-miR-877 | -16.9 | 481 |
| bta-miR-877 | -16.6 | 423 |
| bta-miR-877 | -16.2 | 521 |
| bta-miR-877 | -16.0 | 84  |
| bta-miR-877 | -15.8 | 276 |
| bta-miR-877 | -14.8 | 740 |
| bta-miR-877 | -14.8 | 543 |
| bta-miR-877 | -14.0 | 307 |
| bta-miR-877 | -13.6 | 657 |
| bta-miR-877 | -13.5 | 330 |
| bta-miR-877 | -13.5 | 2   |
| bta-miR-877 | -11.2 | 236 |
| bta-miR-877 | -10.7 | 142 |
| bta-miR-877 | -10.6 | 321 |

|             |       |     |
|-------------|-------|-----|
| bta-miR-877 | -10.1 | 267 |
| bta-miR-885 | -30.0 | 604 |
| bta-miR-885 | -23.8 | 11  |
| bta-miR-885 | -21.8 | 66  |
| bta-miR-885 | -20.1 | 479 |
| bta-miR-885 | -20.0 | 411 |
| bta-miR-885 | -18.7 | 201 |
| bta-miR-885 | -18.1 | 622 |
| bta-miR-885 | -18.1 | 442 |
| bta-miR-885 | -16.9 | 349 |
| bta-miR-885 | -15.9 | 239 |
| bta-miR-885 | -15.0 | 575 |
| bta-miR-885 | -13.3 | 172 |
| bta-miR-885 | -13.2 | 654 |
| bta-miR-885 | -12.8 | 517 |
| bta-miR-885 | -11.3 | 376 |
| bta-miR-885 | -10.9 | 85  |
| bta-miR-885 | -10.9 | 270 |
| bta-miR-885 | -10.6 | 40  |
| bta-miR-885 | -10.4 | 154 |
| bta-miR-885 | -10.3 | 109 |
| bta-miR-885 | -10.2 | 539 |
| bta-miR-885 | -10.0 | 424 |
| bta-miR-92a | -31.0 | 10  |
| bta-miR-92a | -28.9 | 602 |
| bta-miR-92a | -26.0 | 358 |
| bta-miR-92a | -24.8 | 481 |
| bta-miR-92a | -24.2 | 411 |
| bta-miR-92a | -22.0 | 66  |
| bta-miR-92a | -20.5 | 114 |
| bta-miR-92a | -19.6 | 499 |
| bta-miR-92a | -19.6 | 442 |
| bta-miR-92a | -18.2 | 264 |
| bta-miR-92a | -17.7 | 575 |
| bta-miR-92a | -17.2 | 623 |
| bta-miR-92a | -15.9 | 154 |
| bta-miR-92a | -14.8 | 35  |
| bta-miR-92a | -14.0 | 199 |
| bta-miR-92a | -13.4 | 176 |
| bta-miR-92a | -13.3 | 560 |
| bta-miR-92a | -13.3 | 596 |
| bta-miR-92a | -11.9 | 737 |
| bta-miR-92a | -11.7 | 462 |
| bta-miR-92a | -11.7 | 654 |
| bta-miR-92a | -11.1 | 241 |
| bta-miR-92a | -10.9 | 86  |
| bta-miR-92a | -10.7 | 106 |
| bta-miR-92a | -10.5 | 304 |
| bta-miR-92a | -10.2 | 341 |
| bta-miR-92b | -29.7 | 614 |
| bta-miR-92b | -28.6 | 11  |
| bta-miR-92b | -25.9 | 412 |
| bta-miR-92b | -25.3 | 479 |
| bta-miR-92b | -24.4 | 69  |
| bta-miR-92b | -24.0 | 357 |
| bta-miR-92b | -23.1 | 592 |
| bta-miR-92b | -21.1 | 499 |
| bta-miR-92b | -20.8 | 441 |
| bta-miR-92b | -17.2 | 218 |

|             |       |     |
|-------------|-------|-----|
| bta-miR-92b | -17.1 | 167 |
| bta-miR-92b | -16.3 | 560 |
| bta-miR-92b | -16.2 | 109 |
| bta-miR-92b | -15.4 | 268 |
| bta-miR-92b | -14.4 | 28  |
| bta-miR-92b | -13.3 | 185 |
| bta-miR-92b | -13.2 | 240 |
| bta-miR-92b | -12.5 | 338 |
| bta-miR-92b | -12.3 | 154 |
| bta-miR-92b | -12.1 | 126 |
| bta-miR-92b | -12.0 | 654 |
| bta-miR-92b | -11.7 | 738 |
| bta-miR-92b | -11.2 | 308 |
| bta-miR-92b | -10.9 | 609 |
| bta-miR-92b | -10.5 | 462 |
| bta-miR-92b | -10.0 | 543 |
| bta-miR-935 | -29.4 | 614 |
| bta-miR-935 | -26.1 | 63  |
| bta-miR-935 | -22.9 | 393 |
| bta-miR-935 | -21.3 | 448 |
| bta-miR-935 | -18.3 | 171 |
| bta-miR-935 | -18.3 | 481 |
| bta-miR-935 | -17.3 | 265 |
| bta-miR-935 | -16.6 | 576 |
| bta-miR-935 | -16.0 | 17  |
| bta-miR-935 | -15.2 | 113 |
| bta-miR-935 | -15.1 | 653 |
| bta-miR-935 | -14.7 | 351 |
| bta-miR-935 | -14.5 | 198 |
| bta-miR-935 | -13.1 | 419 |
| bta-miR-935 | -12.9 | 539 |
| bta-miR-935 | -12.6 | 738 |
| bta-miR-935 | -12.6 | 228 |
| bta-miR-935 | -11.8 | 517 |
| bta-miR-935 | -10.9 | 84  |
| bta-miR-935 | -10.8 | 376 |
| bta-miR-935 | -10.0 | 154 |
| bta-miR-940 | -34.8 | 615 |
| bta-miR-940 | -31.3 | 411 |
| bta-miR-940 | -29.9 | 463 |
| bta-miR-940 | -28.1 | 62  |
| bta-miR-940 | -24.0 | 108 |
| bta-miR-940 | -24.0 | 167 |
| bta-miR-940 | -23.4 | 220 |
| bta-miR-940 | -23.2 | 497 |
| bta-miR-940 | -22.9 | 265 |
| bta-miR-940 | -22.4 | 438 |
| bta-miR-940 | -21.6 | 25  |
| bta-miR-940 | -20.5 | 357 |
| bta-miR-940 | -18.6 | 654 |
| bta-miR-940 | -17.5 | 280 |
| bta-miR-940 | -17.2 | 586 |
| bta-miR-940 | -16.3 | 370 |
| bta-miR-940 | -16.2 | 12  |
| bta-miR-940 | -15.2 | 559 |
| bta-miR-940 | -14.6 | 199 |
| bta-miR-940 | -13.6 | 97  |
| bta-miR-940 | -13.0 | 738 |
| bta-miR-940 | -12.6 | 324 |

|             |       |     |
|-------------|-------|-----|
| bta-miR-940 | -12.4 | 429 |
| bta-miR-940 | -11.8 | 155 |
| bta-miR-940 | -11.2 | 135 |
| bta-miR-940 | -10.0 | 330 |
| bta-miR-95  | -20.8 | 415 |
| bta-miR-95  | -19.8 | 344 |
| bta-miR-95  | -18.9 | 13  |
| bta-miR-95  | -18.6 | 585 |
| bta-miR-95  | -16.7 | 293 |
| bta-miR-95  | -16.6 | 262 |
| bta-miR-95  | -16.4 | 73  |
| bta-miR-95  | -16.0 | 488 |
| bta-miR-95  | -15.9 | 730 |
| bta-miR-95  | -15.3 | 624 |
| bta-miR-95  | -15.2 | 550 |
| bta-miR-95  | -15.0 | 156 |
| bta-miR-95  | -14.1 | 388 |
| bta-miR-95  | -13.8 | 96  |
| bta-miR-95  | -13.7 | 235 |
| bta-miR-95  | -13.4 | 519 |
| bta-miR-95  | -13.1 | 457 |
| bta-miR-95  | -12.7 | 465 |
| bta-miR-95  | -12.7 | 697 |
| bta-miR-95  | -12.3 | 126 |
| bta-miR-95  | -12.0 | 668 |
| bta-miR-95  | -11.8 | 51  |
| bta-miR-95  | -11.8 | 185 |
| bta-miR-95  | -11.8 | 370 |
| bta-miR-95  | -11.8 | 327 |
| bta-miR-95  | -10.9 | 320 |
| bta-miR-95  | -10.0 | 116 |
| bta-miR-96  | -25.3 | 653 |
| bta-miR-96  | -24.1 | 12  |
| bta-miR-96  | -21.9 | 407 |
| bta-miR-96  | -19.8 | 72  |
| bta-miR-96  | -18.9 | 539 |
| bta-miR-96  | -18.8 | 605 |
| bta-miR-96  | -17.8 | 224 |
| bta-miR-96  | -17.7 | 447 |
| bta-miR-96  | -17.6 | 518 |
| bta-miR-96  | -17.5 | 573 |
| bta-miR-96  | -17.2 | 108 |
| bta-miR-96  | -16.7 | 725 |
| bta-miR-96  | -16.5 | 344 |
| bta-miR-96  | -16.4 | 472 |
| bta-miR-96  | -16.1 | 371 |
| bta-miR-96  | -14.5 | 171 |
| bta-miR-96  | -14.2 | 488 |
| bta-miR-96  | -13.8 | 198 |
| bta-miR-96  | -13.6 | 243 |
| bta-miR-96  | -13.2 | 270 |
| bta-miR-96  | -12.1 | 687 |
| bta-miR-96  | -11.6 | 633 |
| bta-miR-96  | -11.5 | 51  |
| bta-miR-96  | -10.7 | 154 |
| bta-miR-96  | -10.2 | 428 |
| bta-miR-9   | -22.6 | 12  |
| bta-miR-9   | -20.4 | 81  |
| bta-miR-9   | -20.2 | 555 |



|             |       |     |
|-------------|-------|-----|
| bta-miR-9   | -19.2 | 106 |
| bta-miR-9   | -19.2 | 222 |
| bta-miR-9   | -18.9 | 414 |
| bta-miR-9   | -17.8 | 454 |
| bta-miR-9   | -17.5 | 170 |
| bta-miR-9   | -17.4 | 621 |
| bta-miR-9   | -17.1 | 493 |
| bta-miR-9   | -16.5 | 473 |
| bta-miR-9   | -15.7 | 584 |
| bta-miR-9   | -15.0 | 264 |
| bta-miR-9   | -15.0 | 354 |
| bta-miR-9   | -14.7 | 37  |
| bta-miR-9   | -14.5 | 150 |
| bta-miR-9   | -13.6 | 733 |
| bta-miR-9   | -13.6 | 64  |
| bta-miR-9   | -13.5 | 654 |
| bta-miR-9   | -13.0 | 122 |
| bta-miR-9   | -12.2 | 379 |
| bta-miR-9   | -12.2 | 340 |
| bta-miR-9   | -12.2 | 602 |
| bta-miR-9   | -12.1 | 705 |
| bta-miR-9   | -11.6 | 517 |
| bta-miR-9   | -10.9 | 300 |
| bta-miR-9*  | -18.0 | 176 |
| bta-miR-9*  | -14.3 | 657 |
| bta-miR-9*  | -14.2 | 2   |
| bta-miR-9*  | -13.7 | 506 |
| bta-miR-9*  | -13.6 | 546 |
| bta-miR-9*  | -13.4 | 449 |
| bta-miR-9*  | -13.3 | 614 |
| bta-miR-9*  | -12.7 | 69  |
| bta-miR-9*  | -12.6 | 576 |
| bta-miR-9*  | -12.3 | 463 |
| bta-miR-9*  | -12.0 | 632 |
| bta-miR-9*  | -11.9 | 742 |
| bta-miR-9*  | -11.7 | 41  |
| bta-miR-9*  | -11.6 | 391 |
| bta-miR-9*  | -11.5 | 269 |
| bta-miR-9*  | -11.2 | 418 |
| bta-miR-9*  | -10.7 | 530 |
| bta-miR-9*  | -10.6 | 597 |
| bta-miR-9*  | -10.2 | 704 |
| bta-miR-9*  | -10.2 | 692 |
| bta-miR-9*  | -10.0 | 81  |
| bta-miR-489 | -20.0 | 8   |
| bta-miR-489 | -18.1 | 654 |
| bta-miR-489 | -17.9 | 562 |
| bta-miR-489 | -17.8 | 537 |
| bta-miR-489 | -17.3 | 86  |
| bta-miR-489 | -16.2 | 519 |
| bta-miR-489 | -15.2 | 360 |
| bta-miR-489 | -15.1 | 244 |
| bta-miR-489 | -14.6 | 624 |
| bta-miR-489 | -14.3 | 408 |
| bta-miR-489 | -14.2 | 109 |
| bta-miR-489 | -13.9 | 696 |
| bta-miR-489 | -13.7 | 51  |
| bta-miR-489 | -12.8 | 743 |
| bta-miR-489 | -12.6 | 140 |

|              |       |     |
|--------------|-------|-----|
| bta-miR-489  | -12.5 | 473 |
| bta-miR-489  | -12.3 | 425 |
| bta-miR-489  | -11.8 | 126 |
| bta-miR-489  | -11.4 | 73  |
| bta-miR-489  | -11.1 | 283 |
| bta-miR-489  | -11.0 | 492 |
| bta-miR-489  | -10.9 | 342 |
| bta-miR-489  | -10.8 | 266 |
| bta-miR-489  | -10.8 | 307 |
| bta-miR-489  | -10.4 | 167 |
| bta-miR-489  | -10.3 | 230 |
| bta-miR-1224 | -26.6 | 467 |
| bta-miR-1224 | -24.8 | 132 |
| bta-miR-1224 | -24.2 | 426 |
| bta-miR-1224 | -24.0 | 317 |
| bta-miR-1224 | -22.8 | 236 |
| bta-miR-1224 | -22.6 | 502 |
| bta-miR-1224 | -22.2 | 86  |
| bta-miR-1224 | -21.9 | 161 |
| bta-miR-1224 | -21.3 | 209 |
| bta-miR-1224 | -21.1 | 579 |
| bta-miR-1224 | -20.7 | 396 |
| bta-miR-1224 | -20.5 | 30  |
| bta-miR-1224 | -20.1 | 107 |
| bta-miR-1224 | -19.0 | 623 |
| bta-miR-1224 | -18.8 | 276 |
| bta-miR-1224 | -17.6 | 561 |
| bta-miR-1224 | -17.0 | 342 |
| bta-miR-1224 | -16.1 | 5   |
| bta-miR-1224 | -15.9 | 693 |
| bta-miR-1224 | -15.5 | 58  |
| bta-miR-1224 | -14.7 | 380 |
| bta-miR-1224 | -13.2 | 410 |
| bta-miR-1224 | -12.9 | 308 |
| bta-miR-1224 | -12.7 | 457 |
| bta-miR-1224 | -12.3 | 533 |
| bta-miR-1224 | -12.1 | 650 |
| bta-miR-1224 | -11.1 | 670 |
| bta-miR-1224 | -10.3 | 368 |
| bta-miR-376b | -19.4 | 709 |
| bta-miR-376b | -18.7 | 198 |
| bta-miR-376b | -17.0 | 81  |
| bta-miR-376b | -16.9 | 615 |
| bta-miR-376b | -16.6 | 12  |
| bta-miR-376b | -16.6 | 227 |
| bta-miR-376b | -16.2 | 464 |
| bta-miR-376b | -16.0 | 352 |
| bta-miR-376b | -15.7 | 573 |
| bta-miR-376b | -15.6 | 661 |
| bta-miR-376b | -15.3 | 266 |
| bta-miR-376b | -15.0 | 419 |
| bta-miR-376b | -14.5 | 497 |
| bta-miR-376b | -14.1 | 65  |
| bta-miR-376b | -13.4 | 383 |
| bta-miR-376b | -13.3 | 171 |
| bta-miR-376b | -12.0 | 303 |
| bta-miR-376b | -11.9 | 105 |
| bta-miR-376b | -11.6 | 638 |
| bta-miR-376b | -11.2 | 595 |

|              |       |     |
|--------------|-------|-----|
| bta-miR-376b | -11.1 | 605 |
| bta-miR-376b | -10.8 | 691 |
| bta-miR-376b | -10.4 | 36  |
| bta-miR-376b | -10.2 | 282 |
| bta-miR-376b | -10.1 | 2   |
| bta-miR-376b | -10.1 | 738 |
| bta-miR-376b | -10.1 | 58  |
| bta-miR-376b | -10.1 | 537 |
| bta-miR-376d | -19.3 | 709 |
| bta-miR-376d | -19.2 | 659 |
| bta-miR-376d | -18.7 | 81  |
| bta-miR-376d | -18.1 | 618 |
| bta-miR-376d | -17.0 | 266 |
| bta-miR-376d | -16.6 | 202 |
| bta-miR-376d | -16.2 | 497 |
| bta-miR-376d | -16.2 | 464 |
| bta-miR-376d | -15.7 | 576 |
| bta-miR-376d | -15.6 | 15  |
| bta-miR-376d | -14.7 | 231 |
| bta-miR-376d | -13.9 | 422 |
| bta-miR-376d | -13.6 | 377 |
| bta-miR-376d | -13.0 | 544 |
| bta-miR-376d | -12.2 | 58  |
| bta-miR-376d | -12.0 | 177 |
| bta-miR-376d | -11.8 | 69  |
| bta-miR-376d | -11.6 | 638 |
| bta-miR-376d | -11.0 | 309 |
| bta-miR-376d | -10.8 | 691 |
| bta-miR-376d | -10.6 | 113 |
| bta-miR-376d | -10.1 | 2   |
| bta-miR-376d | -10.0 | 412 |
| bta-miR-376c | -23.2 | 444 |
| bta-miR-376c | -19.2 | 486 |
| bta-miR-376c | -19.1 | 600 |
| bta-miR-376c | -18.3 | 204 |
| bta-miR-376c | -18.1 | 351 |
| bta-miR-376c | -17.8 | 104 |
| bta-miR-376c | -17.0 | 65  |
| bta-miR-376c | -17.0 | 170 |
| bta-miR-376c | -15.8 | 651 |
| bta-miR-376c | -15.0 | 303 |
| bta-miR-376c | -14.9 | 11  |
| bta-miR-376c | -13.9 | 94  |
| bta-miR-376c | -13.9 | 406 |
| bta-miR-376c | -13.8 | 269 |
| bta-miR-376c | -13.0 | 730 |
| bta-miR-376c | -12.6 | 618 |
| bta-miR-376c | -12.6 | 701 |
| bta-miR-376c | -12.3 | 27  |
| bta-miR-376c | -12.2 | 242 |
| bta-miR-376c | -11.4 | 149 |
| bta-miR-376c | -11.3 | 464 |
| bta-miR-376c | -11.2 | 558 |
| bta-miR-376c | -10.4 | 124 |
| bta-miR-376c | -10.3 | 471 |
| bta-miR-764  | -29.7 | 444 |
| bta-miR-764  | -25.6 | 610 |
| bta-miR-764  | -24.6 | 366 |
| bta-miR-764  | -22.7 | 11  |

|                 |       |     |
|-----------------|-------|-----|
| bta-miR-764     | -20.4 | 224 |
| bta-miR-764     | -20.3 | 174 |
| bta-miR-764     | -20.2 | 348 |
| bta-miR-764     | -20.1 | 405 |
| bta-miR-764     | -19.6 | 69  |
| bta-miR-764     | -17.5 | 265 |
| bta-miR-764     | -17.1 | 26  |
| bta-miR-764     | -16.5 | 479 |
| bta-miR-764     | -16.1 | 101 |
| bta-miR-764     | -13.9 | 630 |
| bta-miR-764     | -13.8 | 574 |
| bta-miR-764     | -13.3 | 658 |
| bta-miR-764     | -12.9 | 433 |
| bta-miR-764     | -12.9 | 543 |
| bta-miR-764     | -12.3 | 153 |
| bta-miR-764     | -12.1 | 731 |
| bta-miR-764     | -12.0 | 37  |
| bta-miR-764     | -11.1 | 597 |
| bta-miR-764     | -10.5 | 312 |
| bta-miR-764     | -10.0 | 517 |
| bta-miR-1225-3p | -35.8 | 609 |
| bta-miR-1225-3p | -35.2 | 477 |
| bta-miR-1225-3p | -34.6 | 69  |
| bta-miR-1225-3p | -27.1 | 448 |
| bta-miR-1225-3p | -27.0 | 266 |
| bta-miR-1225-3p | -26.6 | 403 |
| bta-miR-1225-3p | -22.9 | 12  |
| bta-miR-1225-3p | -22.7 | 369 |
| bta-miR-1225-3p | -19.8 | 112 |
| bta-miR-1225-3p | -16.9 | 598 |
| bta-miR-1225-3p | -15.8 | 155 |
| bta-miR-1225-3p | -14.0 | 654 |
| bta-miR-1225-3p | -14.0 | 216 |
| bta-miR-1225-3p | -12.9 | 740 |
| bta-miR-1225-3p | -12.7 | 560 |
| bta-miR-1225-3p | -12.7 | 631 |
| bta-miR-1225-3p | -12.6 | 199 |
| bta-miR-1225-3p | -11.4 | 507 |
| bta-miR-1225-3p | -10.7 | 427 |
| bta-miR-29e     | -21.8 | 65  |
| bta-miR-29e     | -18.9 | 366 |
| bta-miR-29e     | -16.9 | 13  |
| bta-miR-29e     | -16.4 | 735 |
| bta-miR-29e     | -15.8 | 558 |
| bta-miR-29e     | -15.3 | 204 |
| bta-miR-29e     | -15.3 | 652 |
| bta-miR-29e     | -15.3 | 403 |
| bta-miR-29e     | -15.0 | 92  |
| bta-miR-29e     | -15.0 | 429 |
| bta-miR-29e     | -14.6 | 604 |
| bta-miR-29e     | -14.0 | 471 |
| bta-miR-29e     | -14.0 | 159 |
| bta-miR-29e     | -13.8 | 264 |
| bta-miR-29e     | -13.4 | 535 |
| bta-miR-29e     | -13.2 | 339 |
| bta-miR-29e     | -13.0 | 711 |
| bta-miR-29e     | -12.6 | 35  |
| bta-miR-29e     | -12.1 | 499 |
| bta-miR-29e     | -11.8 | 628 |

|              |       |     |
|--------------|-------|-----|
| bta-miR-29e  | -11.8 | 685 |
| bta-miR-29e  | -10.2 | 238 |
| bta-miR-29e  | -10.2 | 299 |
| bta-miR-1282 | -24.8 | 604 |
| bta-miR-1282 | -22.2 | 197 |
| bta-miR-1282 | -20.2 | 434 |
| bta-miR-1282 | -20.0 | 264 |
| bta-miR-1282 | -19.5 | 65  |
| bta-miR-1282 | -18.5 | 471 |
| bta-miR-1282 | -18.1 | 414 |
| bta-miR-1282 | -16.1 | 622 |
| bta-miR-1282 | -16.0 | 11  |
| bta-miR-1282 | -15.8 | 100 |
| bta-miR-1282 | -15.2 | 171 |
| bta-miR-1282 | -14.1 | 494 |
| bta-miR-1282 | -14.0 | 153 |
| bta-miR-1282 | -13.7 | 558 |
| bta-miR-1282 | -13.3 | 652 |
| bta-miR-1282 | -12.9 | 349 |
| bta-miR-1282 | -10.7 | 29  |
| bta-miR-1282 | -10.6 | 124 |
| bta-miR-1282 | -10.5 | 238 |
| bta-miR-1282 | -10.0 | 737 |
| bta-miR-1284 | -27.7 | 405 |
| bta-miR-1284 | -26.7 | 47  |
| bta-miR-1284 | -23.8 | 614 |
| bta-miR-1284 | -23.1 | 11  |
| bta-miR-1284 | -23.0 | 572 |
| bta-miR-1284 | -22.6 | 470 |
| bta-miR-1284 | -22.3 | 171 |
| bta-miR-1284 | -22.1 | 102 |
| bta-miR-1284 | -21.0 | 70  |
| bta-miR-1284 | -19.2 | 506 |
| bta-miR-1284 | -18.9 | 441 |
| bta-miR-1284 | -18.7 | 596 |
| bta-miR-1284 | -17.1 | 557 |
| bta-miR-1284 | -16.7 | 203 |
| bta-miR-1284 | -16.7 | 240 |
| bta-miR-1284 | -16.7 | 361 |
| bta-miR-1284 | -15.7 | 652 |
| bta-miR-1284 | -14.1 | 28  |
| bta-miR-1284 | -13.7 | 225 |
| bta-miR-1284 | -13.6 | 279 |
| bta-miR-1284 | -13.3 | 424 |
| bta-miR-1284 | -12.4 | 541 |
| bta-miR-1284 | -12.1 | 4   |
| bta-miR-1284 | -12.1 | 735 |
| bta-miR-1284 | -11.3 | 153 |
| bta-miR-1284 | -10.9 | 338 |
| bta-miR-1284 | -10.0 | 386 |
| bta-miR-376a | -19.3 | 709 |
| bta-miR-376a | -18.7 | 81  |
| bta-miR-376a | -18.1 | 618 |
| bta-miR-376a | -17.7 | 660 |
| bta-miR-376a | -17.0 | 266 |
| bta-miR-376a | -16.6 | 202 |
| bta-miR-376a | -16.2 | 497 |
| bta-miR-376a | -16.2 | 464 |
| bta-miR-376a | -16.2 | 13  |

|              |       |     |
|--------------|-------|-----|
| bta-miR-376a | -15.7 | 576 |
| bta-miR-376a | -14.7 | 231 |
| bta-miR-376a | -14.5 | 172 |
| bta-miR-376a | -14.5 | 420 |
| bta-miR-376a | -12.3 | 367 |
| bta-miR-376a | -12.2 | 58  |
| bta-miR-376a | -11.8 | 69  |
| bta-miR-376a | -11.7 | 396 |
| bta-miR-376a | -11.6 | 638 |
| bta-miR-376a | -11.5 | 545 |
| bta-miR-376a | -11.0 | 309 |
| bta-miR-376a | -10.8 | 691 |
| bta-miR-376a | -10.6 | 113 |
| bta-miR-376a | -10.1 | 2   |
| bta-miR-376a | -10.0 | 412 |
| bta-miR-1291 | -30.8 | 66  |
| bta-miR-1291 | -29.3 | 602 |
| bta-miR-1291 | -26.2 | 451 |
| bta-miR-1291 | -25.2 | 250 |
| bta-miR-1291 | -23.9 | 560 |
| bta-miR-1291 | -23.4 | 387 |
| bta-miR-1291 | -21.3 | 6   |
| bta-miR-1291 | -21.3 | 492 |
| bta-miR-1291 | -20.7 | 92  |
| bta-miR-1291 | -18.7 | 275 |
| bta-miR-1291 | -18.5 | 628 |
| bta-miR-1291 | -18.1 | 38  |
| bta-miR-1291 | -17.9 | 418 |
| bta-miR-1291 | -17.3 | 216 |
| bta-miR-1291 | -17.2 | 172 |
| bta-miR-1291 | -14.9 | 146 |
| bta-miR-1291 | -14.6 | 685 |
| bta-miR-1291 | -14.2 | 529 |
| bta-miR-1291 | -13.8 | 427 |
| bta-miR-1291 | -12.9 | 364 |
| bta-miR-1291 | -12.3 | 118 |
| bta-miR-1291 | -10.8 | 738 |
| bta-miR-1179 | -23.2 | 164 |
| bta-miR-1179 | -20.9 | 340 |
| bta-miR-1179 | -19.8 | 603 |
| bta-miR-1179 | -19.6 | 407 |
| bta-miR-1179 | -18.9 | 568 |
| bta-miR-1179 | -18.8 | 364 |
| bta-miR-1179 | -18.0 | 511 |
| bta-miR-1179 | -17.4 | 468 |
| bta-miR-1179 | -17.3 | 426 |
| bta-miR-1179 | -16.0 | 723 |
| bta-miR-1179 | -15.5 | 261 |
| bta-miR-1179 | -15.3 | 52  |
| bta-miR-1179 | -15.2 | 107 |
| bta-miR-1179 | -15.0 | 210 |
| bta-miR-1179 | -14.7 | 450 |
| bta-miR-1179 | -14.4 | 5   |
| bta-miR-1179 | -14.0 | 650 |
| bta-miR-1179 | -13.1 | 229 |
| bta-miR-1179 | -12.1 | 495 |
| bta-miR-1179 | -12.1 | 136 |
| bta-miR-1179 | -11.8 | 120 |
| bta-miR-1179 | -11.6 | 92  |

|              |       |     |
|--------------|-------|-----|
| bta-miR-1179 | -11.6 | 699 |
| bta-miR-1179 | -11.0 | 29  |
| bta-miR-1179 | -10.7 | 630 |
| bta-miR-1179 | -10.6 | 188 |
| bta-miR-1179 | -10.6 | 670 |
| bta-miR-1179 | -10.1 | 325 |
| bta-miR-1301 | -26.9 | 54  |
| bta-miR-1301 | -24.6 | 102 |
| bta-miR-1301 | -24.1 | 177 |
| bta-miR-1301 | -24.0 | 624 |
| bta-miR-1301 | -23.9 | 4   |
| bta-miR-1301 | -22.7 | 475 |
| bta-miR-1301 | -22.6 | 394 |
| bta-miR-1301 | -20.8 | 258 |
| bta-miR-1301 | -20.5 | 137 |
| bta-miR-1301 | -18.7 | 429 |
| bta-miR-1301 | -18.1 | 350 |
| bta-miR-1301 | -18.0 | 574 |
| bta-miR-1301 | -17.7 | 537 |
| bta-miR-1301 | -17.7 | 589 |
| bta-miR-1301 | -17.3 | 502 |
| bta-miR-1301 | -15.6 | 208 |
| bta-miR-1301 | -14.2 | 731 |
| bta-miR-1301 | -13.8 | 30  |
| bta-miR-1301 | -13.0 | 613 |
| bta-miR-1301 | -12.2 | 690 |
| bta-miR-1301 | -12.1 | 458 |
| bta-miR-1301 | -12.1 | 236 |
| bta-miR-1301 | -11.9 | 657 |
| bta-miR-1301 | -11.3 | 131 |
| bta-miR-1301 | -10.6 | 315 |
| bta-miR-1301 | -10.5 | 90  |
| bta-miR-1301 | -10.4 | 385 |
| bta-miR-1301 | -10.0 | 291 |
| bta-miR-1256 | -24.5 | 235 |
| bta-miR-1256 | -23.5 | 344 |
| bta-miR-1256 | -22.1 | 436 |
| bta-miR-1256 | -22.1 | 391 |
| bta-miR-1256 | -20.3 | 215 |
| bta-miR-1256 | -19.9 | 501 |
| bta-miR-1256 | -19.8 | 14  |
| bta-miR-1256 | -19.8 | 608 |
| bta-miR-1256 | -18.8 | 566 |
| bta-miR-1256 | -18.6 | 476 |
| bta-miR-1256 | -17.8 | 267 |
| bta-miR-1256 | -17.7 | 60  |
| bta-miR-1256 | -17.2 | 174 |
| bta-miR-1256 | -16.8 | 628 |
| bta-miR-1256 | -16.3 | 369 |
| bta-miR-1256 | -14.7 | 650 |
| bta-miR-1256 | -14.2 | 112 |
| bta-miR-1256 | -14.1 | 198 |
| bta-miR-1256 | -14.0 | 418 |
| bta-miR-1256 | -12.7 | 734 |
| bta-miR-1256 | -11.4 | 1   |
| bta-miR-1256 | -10.9 | 539 |
| bta-miR-1256 | -10.9 | 681 |
| bta-miR-1256 | -10.5 | 51  |
| bta-miR-1256 | -10.4 | 94  |

|              |       |     |
|--------------|-------|-----|
| bta-miR-1835 | -30.8 | 243 |
| bta-miR-1835 | -29.8 | 463 |
| bta-miR-1835 | -29.7 | 617 |
| bta-miR-1835 | -28.0 | 29  |
| bta-miR-1835 | -26.3 | 165 |
| bta-miR-1835 | -24.4 | 407 |
| bta-miR-1835 | -24.0 | 4   |
| bta-miR-1835 | -23.4 | 107 |
| bta-miR-1835 | -22.2 | 559 |
| bta-miR-1835 | -22.0 | 361 |
| bta-miR-1835 | -21.0 | 513 |
| bta-miR-1835 | -19.9 | 205 |
| bta-miR-1835 | -19.6 | 596 |
| bta-miR-1835 | -18.7 | 389 |
| bta-miR-1835 | -18.1 | 431 |
| bta-miR-1835 | -17.3 | 128 |
| bta-miR-1835 | -16.4 | 80  |
| bta-miR-1835 | -16.1 | 282 |
| bta-miR-1835 | -15.4 | 650 |
| bta-miR-1835 | -15.4 | 496 |
| bta-miR-1835 | -14.2 | 326 |
| bta-miR-1835 | -14.2 | 532 |
| bta-miR-1835 | -14.1 | 181 |
| bta-miR-1835 | -12.3 | 691 |
| bta-miR-1835 | -12.2 | 234 |
| bta-miR-1835 | -11.5 | 737 |
| bta-miR-1835 | -11.1 | 98  |
| bta-miR-1835 | -10.8 | 321 |
| bta-miR-1835 | -10.6 | 276 |
| bta-miR-1835 | -10.5 | 715 |
| bta-miR-1835 | -10.3 | 155 |
| bta-miR-1281 | -29.3 | 609 |
| bta-miR-1281 | -25.5 | 443 |
| bta-miR-1281 | -20.3 | 220 |
| bta-miR-1281 | -19.8 | 69  |
| bta-miR-1281 | -16.2 | 411 |
| bta-miR-1281 | -15.9 | 479 |
| bta-miR-1281 | -15.8 | 348 |
| bta-miR-1281 | -15.0 | 266 |
| bta-miR-1281 | -15.0 | 598 |
| bta-miR-1281 | -14.5 | 630 |
| bta-miR-1281 | -14.1 | 12  |
| bta-miR-1281 | -12.6 | 154 |
| bta-miR-1281 | -12.4 | 496 |
| bta-miR-1281 | -11.7 | 737 |
| bta-miR-1281 | -10.8 | 434 |
| bta-miR-1281 | -10.7 | 202 |
| bta-miR-1281 | -10.7 | 371 |
| bta-miR-1281 | -10.6 | 114 |
| bta-miR-1281 | -10.1 | 37  |
| bta-miR-1251 | -26.4 | 408 |
| bta-miR-1251 | -21.9 | 473 |
| bta-miR-1251 | -21.9 | 608 |
| bta-miR-1251 | -20.4 | 70  |
| bta-miR-1251 | -20.3 | 20  |
| bta-miR-1251 | -19.8 | 108 |
| bta-miR-1251 | -19.1 | 358 |
| bta-miR-1251 | -18.6 | 171 |
| bta-miR-1251 | -18.2 | 425 |



|              |       |     |
|--------------|-------|-----|
| bta-miR-1251 | -17.4 | 258 |
| bta-miR-1251 | -17.0 | 3   |
| bta-miR-1251 | -16.7 | 205 |
| bta-miR-1251 | -16.4 | 559 |
| bta-miR-1251 | -15.7 | 517 |
| bta-miR-1251 | -15.7 | 50  |
| bta-miR-1251 | -15.2 | 741 |
| bta-miR-1251 | -14.6 | 653 |
| bta-miR-1251 | -14.0 | 448 |
| bta-miR-1251 | -12.9 | 379 |
| bta-miR-1251 | -11.9 | 243 |
| bta-miR-1251 | -11.7 | 697 |
| bta-miR-1251 | -11.4 | 307 |
| bta-miR-1251 | -10.8 | 155 |
| bta-miR-1251 | -10.8 | 343 |
| bta-miR-1251 | -10.3 | 596 |
| bta-miR-1251 | -10.3 | 544 |
| bta-miR-1296 | -33.1 | 609 |
| bta-miR-1296 | -33.0 | 220 |
| bta-miR-1296 | -28.8 | 414 |
| bta-miR-1296 | -28.0 | 449 |
| bta-miR-1296 | -27.5 | 69  |
| bta-miR-1296 | -23.6 | 266 |
| bta-miR-1296 | -23.4 | 350 |
| bta-miR-1296 | -21.4 | 480 |
| bta-miR-1296 | -21.3 | 101 |
| bta-miR-1296 | -19.8 | 17  |
| bta-miR-1296 | -19.4 | 171 |
| bta-miR-1296 | -19.3 | 125 |
| bta-miR-1296 | -19.2 | 37  |
| bta-miR-1296 | -16.3 | 1   |
| bta-miR-1296 | -16.1 | 570 |
| bta-miR-1296 | -16.0 | 515 |
| bta-miR-1296 | -15.5 | 371 |
| bta-miR-1296 | -15.5 | 661 |
| bta-miR-1296 | -15.0 | 404 |
| bta-miR-1296 | -14.4 | 201 |
| bta-miR-1296 | -14.4 | 589 |
| bta-miR-1296 | -13.7 | 629 |
| bta-miR-1296 | -13.6 | 737 |
| bta-miR-1296 | -13.2 | 559 |
| bta-miR-1296 | -12.0 | 252 |
| bta-miR-1296 | -11.8 | 325 |
| bta-miR-1296 | -11.4 | 308 |
| bta-miR-1296 | -11.2 | 154 |
| bta-miR-1296 | -10.9 | 709 |
| bta-miR-1296 | -10.7 | 439 |
| bta-miR-1296 | -10.6 | 119 |
| bta-miR-1296 | -10.2 | 698 |
| bta-miR-1193 | -27.3 | 8   |
| bta-miR-1193 | -22.4 | 617 |
| bta-miR-1193 | -20.8 | 407 |
| bta-miR-1193 | -19.8 | 63  |
| bta-miR-1193 | -19.6 | 435 |
| bta-miR-1193 | -19.1 | 464 |
| bta-miR-1193 | -17.8 | 263 |
| bta-miR-1193 | -17.6 | 496 |
| bta-miR-1193 | -16.9 | 566 |
| bta-miR-1193 | -15.9 | 349 |

|              |       |     |
|--------------|-------|-----|
| bta-miR-1193 | -15.8 | 35  |
| bta-miR-1193 | -15.5 | 94  |
| bta-miR-1193 | -15.1 | 166 |
| bta-miR-1193 | -14.6 | 224 |
| bta-miR-1193 | -14.5 | 737 |
| bta-miR-1193 | -14.4 | 598 |
| bta-miR-1193 | -14.0 | 371 |
| bta-miR-1193 | -12.4 | 653 |
| bta-miR-1193 | -12.2 | 123 |
| bta-miR-1193 | -11.8 | 532 |
| bta-miR-1193 | -11.4 | 393 |
| bta-miR-1193 | -10.9 | 704 |
| bta-miR-1193 | -10.7 | 332 |
| bta-miR-1193 | -10.2 | 26  |
| bta-miR-1193 | -10.0 | 584 |
| bta-miR-1197 | -21.8 | 79  |
| bta-miR-1197 | -20.5 | 16  |
| bta-miR-1197 | -20.3 | 371 |
| bta-miR-1197 | -19.5 | 219 |
| bta-miR-1197 | -19.3 | 566 |
| bta-miR-1197 | -18.4 | 496 |
| bta-miR-1197 | -18.4 | 418 |
| bta-miR-1197 | -18.3 | 614 |
| bta-miR-1197 | -17.8 | 348 |
| bta-miR-1197 | -17.3 | 450 |
| bta-miR-1197 | -15.3 | 239 |
| bta-miR-1197 | -15.2 | 517 |
| bta-miR-1197 | -14.8 | 653 |
| bta-miR-1197 | -14.1 | 34  |
| bta-miR-1197 | -14.1 | 198 |
| bta-miR-1197 | -13.7 | 539 |
| bta-miR-1197 | -13.7 | 481 |
| bta-miR-1197 | -13.5 | 265 |
| bta-miR-1197 | -13.3 | 1   |
| bta-miR-1197 | -13.3 | 101 |
| bta-miR-1197 | -13.2 | 405 |
| bta-miR-1197 | -12.7 | 731 |
| bta-miR-1197 | -12.5 | 174 |
| bta-miR-1197 | -12.5 | 51  |
| bta-miR-1197 | -12.2 | 126 |
| bta-miR-1197 | -12.2 | 709 |
| bta-miR-1197 | -11.5 | 279 |
| bta-miR-1197 | -11.3 | 154 |
| bta-miR-1197 | -10.9 | 305 |
| bta-miR-1197 | -10.7 | 65  |
| bta-miR-1197 | -10.1 | 598 |
| bta-miR-1839 | -23.6 | 374 |
| bta-miR-1839 | -21.2 | 573 |
| bta-miR-1839 | -21.2 | 546 |
| bta-miR-1839 | -19.5 | 278 |
| bta-miR-1839 | -19.5 | 108 |
| bta-miR-1839 | -19.2 | 410 |
| bta-miR-1839 | -18.4 | 736 |
| bta-miR-1839 | -17.1 | 1   |
| bta-miR-1839 | -17.0 | 480 |
| bta-miR-1839 | -16.9 | 635 |
| bta-miR-1839 | -16.7 | 70  |
| bta-miR-1839 | -16.3 | 350 |
| bta-miR-1839 | -15.3 | 240 |

|              |       |     |
|--------------|-------|-----|
| bta-miR-1839 | -15.2 | 651 |
| bta-miR-1839 | -15.1 | 455 |
| bta-miR-1839 | -15.0 | 517 |
| bta-miR-1839 | -14.5 | 176 |
| bta-miR-1839 | -14.4 | 202 |
| bta-miR-1839 | -13.8 | 16  |
| bta-miR-1839 | -13.1 | 684 |
| bta-miR-1839 | -12.6 | 49  |
| bta-miR-1839 | -12.4 | 308 |
| bta-miR-1839 | -12.1 | 152 |
| bta-miR-1839 | -11.9 | 702 |
| bta-miR-1839 | -10.9 | 621 |
| bta-miR-1839 | -10.5 | 123 |
| bta-miR-1839 | -10.1 | 35  |
| bta-miR-1307 | -29.0 | 416 |
| bta-miR-1307 | -27.2 | 1   |
| bta-miR-1307 | -24.5 | 112 |
| bta-miR-1307 | -22.3 | 172 |
| bta-miR-1307 | -22.1 | 569 |
| bta-miR-1307 | -20.1 | 352 |
| bta-miR-1307 | -20.0 | 590 |
| bta-miR-1307 | -19.6 | 457 |
| bta-miR-1307 | -19.2 | 39  |
| bta-miR-1307 | -18.9 | 660 |
| bta-miR-1307 | -18.4 | 83  |
| bta-miR-1307 | -18.3 | 305 |
| bta-miR-1307 | -18.3 | 543 |
| bta-miR-1307 | -18.0 | 229 |
| bta-miR-1307 | -17.8 | 155 |
| bta-miR-1307 | -17.4 | 482 |
| bta-miR-1307 | -16.8 | 130 |
| bta-miR-1307 | -16.4 | 403 |
| bta-miR-1307 | -16.2 | 20  |
| bta-miR-1307 | -16.2 | 738 |
| bta-miR-1307 | -16.1 | 628 |
| bta-miR-1307 | -15.8 | 504 |
| bta-miR-1307 | -15.3 | 256 |
| bta-miR-1307 | -13.8 | 204 |
| bta-miR-1307 | -13.6 | 326 |
| bta-miR-1307 | -13.6 | 372 |
| bta-miR-1307 | -13.2 | 611 |
| bta-miR-1307 | -11.5 | 438 |
| bta-miR-1307 | -10.2 | 693 |
| bta-miR-1298 | -23.9 | 106 |
| bta-miR-1298 | -23.0 | 415 |
| bta-miR-1298 | -22.6 | 4   |
| bta-miR-1298 | -22.3 | 473 |
| bta-miR-1298 | -19.6 | 66  |
| bta-miR-1298 | -19.5 | 383 |
| bta-miR-1298 | -19.2 | 149 |
| bta-miR-1298 | -18.9 | 206 |
| bta-miR-1298 | -18.9 | 551 |
| bta-miR-1298 | -18.1 | 705 |
| bta-miR-1298 | -17.8 | 654 |
| bta-miR-1298 | -17.7 | 606 |
| bta-miR-1298 | -17.5 | 369 |
| bta-miR-1298 | -17.1 | 21  |
| bta-miR-1298 | -16.8 | 343 |
| bta-miR-1298 | -16.7 | 575 |

|              |       |     |
|--------------|-------|-----|
| bta-miR-1298 | -15.3 | 235 |
| bta-miR-1298 | -15.0 | 39  |
| bta-miR-1298 | -14.9 | 740 |
| bta-miR-1298 | -14.6 | 256 |
| bta-miR-1298 | -13.9 | 183 |
| bta-miR-1298 | -13.4 | 441 |
| bta-miR-1298 | -12.9 | 271 |
| bta-miR-1298 | -12.5 | 454 |
| bta-miR-1298 | -12.0 | 297 |
| bta-miR-1298 | -11.8 | 125 |
| bta-miR-1298 | -11.5 | 407 |
| bta-miR-1298 | -10.6 | 517 |
| bta-miR-1287 | -22.7 | 42  |
| bta-miR-1287 | -22.6 | 466 |
| bta-miR-1287 | -22.2 | 403 |
| bta-miR-1287 | -20.4 | 72  |
| bta-miR-1287 | -20.4 | 115 |
| bta-miR-1287 | -20.4 | 155 |
| bta-miR-1287 | -19.9 | 500 |
| bta-miR-1287 | -19.8 | 130 |
| bta-miR-1287 | -19.4 | 570 |
| bta-miR-1287 | -19.1 | 352 |
| bta-miR-1287 | -18.8 | 9   |
| bta-miR-1287 | -17.3 | 310 |
| bta-miR-1287 | -17.1 | 377 |
| bta-miR-1287 | -16.5 | 623 |
| bta-miR-1287 | -15.8 | 233 |
| bta-miR-1287 | -15.8 | 424 |
| bta-miR-1287 | -15.0 | 275 |
| bta-miR-1287 | -14.8 | 520 |
| bta-miR-1287 | -13.9 | 731 |
| bta-miR-1287 | -13.7 | 693 |
| bta-miR-1287 | -13.2 | 659 |
| bta-miR-1287 | -12.8 | 452 |
| bta-miR-1287 | -11.6 | 337 |
| bta-miR-1287 | -11.4 | 28  |
| bta-miR-1287 | -11.1 | 207 |
| bta-miR-1287 | -10.8 | 102 |
| bta-miR-1287 | -10.3 | 558 |
| bta-miR-1248 | -26.7 | 12  |
| bta-miR-1248 | -26.2 | 64  |
| bta-miR-1248 | -25.1 | 575 |
| bta-miR-1248 | -24.2 | 419 |
| bta-miR-1248 | -18.5 | 487 |
| bta-miR-1248 | -18.5 | 198 |
| bta-miR-1248 | -17.6 | 351 |
| bta-miR-1248 | -17.5 | 653 |
| bta-miR-1248 | -17.1 | 516 |
| bta-miR-1248 | -17.1 | 101 |
| bta-miR-1248 | -16.5 | 407 |
| bta-miR-1248 | -15.9 | 155 |
| bta-miR-1248 | -15.5 | 456 |
| bta-miR-1248 | -15.3 | 258 |
| bta-miR-1248 | -13.8 | 181 |
| bta-miR-1248 | -12.9 | 381 |
| bta-miR-1248 | -12.7 | 282 |
| bta-miR-1248 | -12.7 | 623 |
| bta-miR-1248 | -12.7 | 737 |
| bta-miR-1248 | -11.5 | 550 |

|              |       |     |
|--------------|-------|-----|
| bta-miR-1248 | -10.9 | 234 |
| bta-miR-1248 | -10.9 | 687 |
| bta-miR-1248 | -10.5 | 559 |
| bta-miR-1185 | -21.6 | 199 |
| bta-miR-1185 | -21.5 | 601 |
| bta-miR-1185 | -21.4 | 66  |
| bta-miR-1185 | -18.4 | 630 |
| bta-miR-1185 | -17.2 | 445 |
| bta-miR-1185 | -16.8 | 10  |
| bta-miR-1185 | -16.8 | 487 |
| bta-miR-1185 | -16.3 | 270 |
| bta-miR-1185 | -16.0 | 172 |
| bta-miR-1185 | -14.6 | 571 |
| bta-miR-1185 | -14.6 | 105 |
| bta-miR-1185 | -14.6 | 414 |
| bta-miR-1185 | -14.6 | 701 |
| bta-miR-1185 | -14.4 | 464 |
| bta-miR-1185 | -14.1 | 29  |
| bta-miR-1185 | -13.8 | 224 |
| bta-miR-1185 | -13.8 | 518 |
| bta-miR-1185 | -13.3 | 352 |
| bta-miR-1185 | -13.1 | 653 |
| bta-miR-1185 | -12.5 | 303 |
| bta-miR-1185 | -12.4 | 479 |
| bta-miR-1185 | -12.3 | 372 |
| bta-miR-1185 | -12.0 | 238 |
| bta-miR-1185 | -11.5 | 257 |
| bta-miR-1185 | -11.3 | 149 |
| bta-miR-1185 | -10.9 | 733 |
| bta-miR-1185 | -10.8 | 96  |
| bta-miR-1185 | -10.0 | 395 |
| bta-miR-1306 | -31.3 | 599 |
| bta-miR-1306 | -25.0 | 66  |
| bta-miR-1306 | -24.0 | 423 |
| bta-miR-1306 | -22.9 | 481 |
| bta-miR-1306 | -20.9 | 3   |
| bta-miR-1306 | -18.0 | 621 |
| bta-miR-1306 | -15.6 | 266 |
| bta-miR-1306 | -15.5 | 172 |
| bta-miR-1306 | -13.8 | 371 |
| bta-miR-1306 | -13.7 | 217 |
| bta-miR-1306 | -13.2 | 343 |
| bta-miR-1306 | -13.1 | 24  |
| bta-miR-1306 | -13.0 | 199 |
| bta-miR-1306 | -12.7 | 415 |
| bta-miR-1306 | -12.7 | 550 |
| bta-miR-1306 | -12.2 | 635 |
| bta-miR-1306 | -12.0 | 565 |
| bta-miR-1306 | -11.7 | 94  |
| bta-miR-1306 | -11.5 | 738 |
| bta-miR-1306 | -11.1 | 695 |
| bta-miR-1306 | -10.0 | 507 |
| bta-miR-1271 | -22.8 | 411 |
| bta-miR-1271 | -22.4 | 473 |
| bta-miR-1271 | -21.1 | 545 |
| bta-miR-1271 | -20.9 | 1   |
| bta-miR-1271 | -20.7 | 356 |
| bta-miR-1271 | -20.0 | 102 |
| bta-miR-1271 | -19.4 | 69  |

|               |       |     |
|---------------|-------|-----|
| bta-miR-1271  | -18.9 | 616 |
| bta-miR-1271  | -18.9 | 730 |
| bta-miR-1271  | -17.9 | 584 |
| bta-miR-1271  | -17.3 | 654 |
| bta-miR-1271  | -17.0 | 517 |
| bta-miR-1271  | -17.0 | 452 |
| bta-miR-1271  | -16.7 | 41  |
| bta-miR-1271  | -16.3 | 267 |
| bta-miR-1271  | -14.5 | 217 |
| bta-miR-1271  | -14.4 | 493 |
| bta-miR-1271  | -13.6 | 702 |
| bta-miR-1271  | -12.2 | 126 |
| bta-miR-1271  | -12.2 | 174 |
| bta-miR-1271  | -12.2 | 240 |
| bta-miR-1271  | -12.0 | 569 |
| bta-miR-1271  | -11.5 | 51  |
| bta-miR-1271  | -11.0 | 438 |
| bta-miR-1271  | -10.8 | 307 |
| bta-miR-1271  | -10.1 | 145 |
| bta-miR-1249  | -38.6 | 611 |
| bta-miR-1249  | -30.0 | 443 |
| bta-miR-1249  | -26.6 | 62  |
| bta-miR-1249  | -25.0 | 404 |
| bta-miR-1249  | -20.7 | 479 |
| bta-miR-1249  | -18.9 | 588 |
| bta-miR-1249  | -17.4 | 12  |
| bta-miR-1249  | -17.3 | 265 |
| bta-miR-1249  | -14.4 | 93  |
| bta-miR-1249  | -14.0 | 220 |
| bta-miR-1249  | -13.2 | 171 |
| bta-miR-1249  | -10.6 | 371 |
| bta-miR-1249  | -10.3 | 41  |
| bta-miR-2284i | -19.7 | 620 |
| bta-miR-2284i | -19.7 | 269 |
| bta-miR-2284i | -18.8 | 159 |
| bta-miR-2284i | -18.5 | 592 |
| bta-miR-2284i | -18.0 | 61  |
| bta-miR-2284i | -17.9 | 408 |
| bta-miR-2284i | -17.2 | 232 |
| bta-miR-2284i | -16.7 | 197 |
| bta-miR-2284i | -16.5 | 94  |
| bta-miR-2284i | -16.0 | 508 |
| bta-miR-2284i | -15.6 | 450 |
| bta-miR-2284i | -15.5 | 558 |
| bta-miR-2284i | -15.1 | 22  |
| bta-miR-2284i | -14.8 | 126 |
| bta-miR-2284i | -14.4 | 306 |
| bta-miR-2284i | -14.2 | 486 |
| bta-miR-2284i | -14.1 | 351 |
| bta-miR-2284i | -13.6 | 383 |
| bta-miR-2284i | -13.5 | 702 |
| bta-miR-2284i | -13.2 | 652 |
| bta-miR-2284i | -12.9 | 326 |
| bta-miR-2284i | -12.2 | 9   |
| bta-miR-2284i | -12.0 | 462 |
| bta-miR-2284i | -11.7 | 735 |
| bta-miR-2284i | -11.5 | 81  |
| bta-miR-2284i | -11.2 | 51  |
| bta-miR-2284i | -10.6 | 429 |

|               |       |     |
|---------------|-------|-----|
| bta-miR-2284i | -10.5 | 610 |
| bta-miR-2286  | -26.3 | 381 |
| bta-miR-2286  | -22.6 | 81  |
| bta-miR-2286  | -22.3 | 420 |
| bta-miR-2286  | -21.5 | 654 |
| bta-miR-2286  | -20.4 | 149 |
| bta-miR-2286  | -20.3 | 457 |
| bta-miR-2286  | -20.0 | 343 |
| bta-miR-2286  | -19.5 | 535 |
| bta-miR-2286  | -18.7 | 1   |
| bta-miR-2286  | -18.5 | 306 |
| bta-miR-2286  | -18.4 | 35  |
| bta-miR-2286  | -18.4 | 106 |
| bta-miR-2286  | -17.6 | 563 |
| bta-miR-2286  | -17.3 | 235 |
| bta-miR-2286  | -16.9 | 488 |
| bta-miR-2286  | -16.7 | 22  |
| bta-miR-2286  | -15.3 | 199 |
| bta-miR-2286  | -15.2 | 256 |
| bta-miR-2286  | -14.3 | 690 |
| bta-miR-2286  | -13.3 | 616 |
| bta-miR-2286  | -12.9 | 328 |
| bta-miR-2286  | -11.5 | 740 |
| bta-miR-2286  | -11.4 | 137 |
| bta-miR-2286  | -11.2 | 61  |
| bta-miR-2286  | -10.8 | 368 |
| bta-miR-2286  | -10.8 | 287 |
| bta-miR-2286  | -10.4 | 181 |
| bta-miR-2286  | -10.3 | 596 |
| bta-miR-2286  | -10.1 | 483 |
| bta-miR-2287  | -29.6 | 114 |
| bta-miR-2287  | -27.8 | 450 |
| bta-miR-2287  | -27.6 | 584 |
| bta-miR-2287  | -27.1 | 375 |
| bta-miR-2287  | -26.1 | 153 |
| bta-miR-2287  | -26.0 | 560 |
| bta-miR-2287  | -24.1 | 79  |
| bta-miR-2287  | -23.2 | 41  |
| bta-miR-2287  | -22.1 | 411 |
| bta-miR-2287  | -21.7 | 20  |
| bta-miR-2287  | -20.8 | 244 |
| bta-miR-2287  | -19.9 | 307 |
| bta-miR-2287  | -18.8 | 357 |
| bta-miR-2287  | -18.5 | 546 |
| bta-miR-2287  | -18.4 | 480 |
| bta-miR-2287  | -17.6 | 265 |
| bta-miR-2287  | -16.5 | 136 |
| bta-miR-2287  | -16.3 | 743 |
| bta-miR-2287  | -16.3 | 659 |
| bta-miR-2287  | -16.2 | 3   |
| bta-miR-2287  | -15.7 | 185 |
| bta-miR-2287  | -15.4 | 337 |
| bta-miR-2287  | -15.2 | 227 |
| bta-miR-2287  | -14.5 | 202 |
| bta-miR-2287  | -14.2 | 616 |
| bta-miR-2287  | -13.4 | 280 |
| bta-miR-2287  | -13.4 | 696 |
| bta-miR-2287  | -13.3 | 518 |
| bta-miR-2287  | -13.3 | 395 |

|               |       |     |
|---------------|-------|-----|
| bta-miR-2287  | -12.6 | 327 |
| bta-miR-2287  | -12.5 | 631 |
| bta-miR-2287  | -12.2 | 107 |
| bta-miR-2287  | -11.1 | 62  |
| bta-miR-2287  | -10.5 | 473 |
| bta-miR-2288  | -22.3 | 119 |
| bta-miR-2288  | -20.5 | 406 |
| bta-miR-2288  | -20.5 | 481 |
| bta-miR-2288  | -19.9 | 376 |
| bta-miR-2288  | -19.2 | 563 |
| bta-miR-2288  | -18.3 | 49  |
| bta-miR-2288  | -18.3 | 361 |
| bta-miR-2288  | -17.9 | 143 |
| bta-miR-2288  | -17.8 | 648 |
| bta-miR-2288  | -15.8 | 508 |
| bta-miR-2288  | -15.5 | 318 |
| bta-miR-2288  | -14.9 | 233 |
| bta-miR-2288  | -14.7 | 166 |
| bta-miR-2288  | -14.6 | 468 |
| bta-miR-2288  | -14.4 | 197 |
| bta-miR-2288  | -14.2 | 91  |
| bta-miR-2288  | -14.0 | 731 |
| bta-miR-2288  | -13.9 | 584 |
| bta-miR-2288  | -13.5 | 11  |
| bta-miR-2288  | -13.4 | 298 |
| bta-miR-2288  | -13.0 | 698 |
| bta-miR-2288  | -11.3 | 455 |
| bta-miR-2288  | -10.8 | 273 |
| bta-miR-2289  | -22.9 | 617 |
| bta-miR-2289  | -20.8 | 412 |
| bta-miR-2289  | -19.9 | 352 |
| bta-miR-2289  | -17.7 | 448 |
| bta-miR-2289  | -16.8 | 24  |
| bta-miR-2289  | -16.6 | 478 |
| bta-miR-2289  | -16.3 | 229 |
| bta-miR-2289  | -15.9 | 172 |
| bta-miR-2289  | -15.9 | 589 |
| bta-miR-2289  | -15.7 | 306 |
| bta-miR-2289  | -15.5 | 69  |
| bta-miR-2289  | -14.8 | 114 |
| bta-miR-2289  | -14.7 | 269 |
| bta-miR-2289  | -13.7 | 155 |
| bta-miR-2289  | -13.6 | 428 |
| bta-miR-2289  | -13.3 | 545 |
| bta-miR-2289  | -12.8 | 497 |
| bta-miR-2289  | -12.4 | 377 |
| bta-miR-2289  | -12.3 | 1   |
| bta-miR-2289  | -11.5 | 658 |
| bta-miR-2289  | -11.1 | 697 |
| bta-miR-2289  | -11.0 | 42  |
| bta-miR-2289  | -10.8 | 570 |
| bta-miR-2289  | -10.7 | 344 |
| bta-miR-2289  | -10.6 | 738 |
| bta-miR-2289  | -10.3 | 524 |
| bta-miR-2285a | -16.2 | 596 |
| bta-miR-2285a | -15.5 | 484 |
| bta-miR-2285a | -15.1 | 277 |
| bta-miR-2285a | -13.2 | 169 |
| bta-miR-2285a | -13.1 | 650 |



|               |       |     |
|---------------|-------|-----|
| bta-miR-2285a | -13.0 | 34  |
| bta-miR-2285a | -12.9 | 452 |
| bta-miR-2285a | -11.7 | 67  |
| bta-miR-2285a | -11.7 | 237 |
| bta-miR-2285a | -11.7 | 572 |
| bta-miR-2285a | -11.4 | 374 |
| bta-miR-2285a | -11.2 | 505 |
| bta-miR-2285a | -10.9 | 136 |
| bta-miR-2285a | -10.8 | 1   |
| bta-miR-2285a | -10.7 | 710 |
| bta-miR-2285a | -10.5 | 309 |
| bta-miR-2285a | -10.5 | 348 |
| bta-miR-2285a | -10.1 | 670 |
| bta-miR-2290  | -24.7 | 49  |
| bta-miR-2290  | -24.2 | 586 |
| bta-miR-2290  | -23.6 | 457 |
| bta-miR-2290  | -23.5 | 184 |
| bta-miR-2290  | -23.5 | 403 |
| bta-miR-2290  | -22.5 | 122 |
| bta-miR-2290  | -22.2 | 84  |
| bta-miR-2290  | -21.5 | 228 |
| bta-miR-2290  | -21.3 | 560 |
| bta-miR-2290  | -20.2 | 10  |
| bta-miR-2290  | -20.0 | 417 |
| bta-miR-2290  | -19.1 | 485 |
| bta-miR-2290  | -18.4 | 257 |
| bta-miR-2290  | -17.8 | 160 |
| bta-miR-2290  | -17.7 | 353 |
| bta-miR-2290  | -17.5 | 737 |
| bta-miR-2290  | -16.8 | 508 |
| bta-miR-2290  | -16.6 | 623 |
| bta-miR-2290  | -16.1 | 320 |
| bta-miR-2290  | -15.0 | 332 |
| bta-miR-2290  | -14.8 | 30  |
| bta-miR-2290  | -13.9 | 611 |
| bta-miR-2290  | -13.7 | 654 |
| bta-miR-2290  | -13.6 | 272 |
| bta-miR-2290  | -13.3 | 210 |
| bta-miR-2290  | -10.8 | 383 |
| bta-miR-2290  | -10.8 | 451 |
| bta-miR-2290  | -10.6 | 698 |
| bta-miR-2290  | -10.4 | 523 |
| bta-miR-2290  | -10.2 | 634 |
| bta-miR-2291  | -28.7 | 30  |
| bta-miR-2291  | -28.1 | 244 |
| bta-miR-2291  | -27.6 | 387 |
| bta-miR-2291  | -26.0 | 109 |
| bta-miR-2291  | -24.9 | 427 |
| bta-miR-2291  | -24.4 | 167 |
| bta-miR-2291  | -24.3 | 513 |
| bta-miR-2291  | -23.5 | 473 |
| bta-miR-2291  | -22.8 | 360 |
| bta-miR-2291  | -21.0 | 132 |
| bta-miR-2291  | -20.0 | 3   |
| bta-miR-2291  | -20.0 | 624 |
| bta-miR-2291  | -19.7 | 561 |
| bta-miR-2291  | -18.7 | 283 |
| bta-miR-2291  | -17.9 | 73  |
| bta-miR-2291  | -17.2 | 740 |

|              |       |     |
|--------------|-------|-----|
| bta-miR-2291 | -16.5 | 686 |
| bta-miR-2291 | -15.3 | 538 |
| bta-miR-2291 | -15.2 | 591 |
| bta-miR-2291 | -15.0 | 329 |
| bta-miR-2291 | -13.2 | 92  |
| bta-miR-2291 | -12.8 | 323 |
| bta-miR-2291 | -12.2 | 657 |
| bta-miR-2291 | -11.9 | 206 |
| bta-miR-2291 | -11.6 | 236 |
| bta-miR-2291 | -11.4 | 276 |
| bta-miR-2291 | -11.0 | 413 |
| bta-miR-2292 | -23.1 | 109 |
| bta-miR-2292 | -22.7 | 257 |
| bta-miR-2292 | -21.8 | 185 |
| bta-miR-2292 | -21.4 | 86  |
| bta-miR-2292 | -20.8 | 562 |
| bta-miR-2292 | -20.4 | 30  |
| bta-miR-2292 | -20.4 | 425 |
| bta-miR-2292 | -20.0 | 3   |
| bta-miR-2292 | -19.9 | 395 |
| bta-miR-2292 | -18.6 | 511 |
| bta-miR-2292 | -18.5 | 457 |
| bta-miR-2292 | -18.1 | 697 |
| bta-miR-2292 | -18.1 | 51  |
| bta-miR-2292 | -17.7 | 360 |
| bta-miR-2292 | -16.2 | 488 |
| bta-miR-2292 | -16.1 | 664 |
| bta-miR-2292 | -16.0 | 136 |
| bta-miR-2292 | -14.8 | 307 |
| bta-miR-2292 | -14.4 | 624 |
| bta-miR-2292 | -13.9 | 244 |
| bta-miR-2292 | -13.0 | 213 |
| bta-miR-2292 | -12.8 | 596 |
| bta-miR-2292 | -12.6 | 530 |
| bta-miR-2292 | -12.6 | 325 |
| bta-miR-2292 | -12.6 | 234 |
| bta-miR-2292 | -11.7 | 164 |
| bta-miR-2292 | -11.6 | 640 |
| bta-miR-2292 | -11.1 | 380 |
| bta-miR-2292 | -10.7 | 286 |
| bta-miR-2292 | -10.3 | 483 |
| bta-miR-2293 | -14.4 | 592 |
| bta-miR-2293 | -13.8 | 483 |
| bta-miR-2293 | -13.3 | 167 |
| bta-miR-2293 | -12.7 | 20  |
| bta-miR-2293 | -12.6 | 264 |
| bta-miR-2293 | -12.3 | 358 |
| bta-miR-2293 | -12.3 | 101 |
| bta-miR-2293 | -12.1 | 151 |
| bta-miR-2293 | -12.0 | 222 |
| bta-miR-2293 | -11.7 | 727 |
| bta-miR-2293 | -11.6 | 199 |
| bta-miR-2293 | -11.0 | 556 |
| bta-miR-2293 | -10.3 | 435 |
| bta-miR-2294 | -27.0 | 85  |
| bta-miR-2294 | -26.9 | 559 |
| bta-miR-2294 | -25.4 | 265 |
| bta-miR-2294 | -25.2 | 617 |
| bta-miR-2294 | -24.4 | 472 |

|              |       |     |
|--------------|-------|-----|
| bta-miR-2294 | -23.5 | 376 |
| bta-miR-2294 | -22.2 | 37  |
| bta-miR-2294 | -22.2 | 65  |
| bta-miR-2294 | -22.1 | 407 |
| bta-miR-2294 | -21.6 | 198 |
| bta-miR-2294 | -21.6 | 586 |
| bta-miR-2294 | -21.0 | 12  |
| bta-miR-2294 | -20.4 | 115 |
| bta-miR-2294 | -20.1 | 506 |
| bta-miR-2294 | -19.5 | 222 |
| bta-miR-2294 | -18.7 | 351 |
| bta-miR-2294 | -17.6 | 653 |
| bta-miR-2294 | -17.6 | 155 |
| bta-miR-2294 | -17.0 | 428 |
| bta-miR-2294 | -16.6 | 293 |
| bta-miR-2294 | -16.5 | 448 |
| bta-miR-2294 | -15.4 | 128 |
| bta-miR-2294 | -14.2 | 687 |
| bta-miR-2294 | -14.0 | 252 |
| bta-miR-2294 | -13.9 | 710 |
| bta-miR-2294 | -13.9 | 184 |
| bta-miR-2294 | -13.0 | 525 |
| bta-miR-2294 | -11.9 | 321 |
| bta-miR-2294 | -11.5 | 544 |
| bta-miR-2294 | -10.6 | 742 |
| bta-miR-2294 | -10.2 | 58  |
| bta-miR-2294 | -10.1 | 1   |
| bta-miR-2295 | -29.1 | 308 |
| bta-miR-2295 | -27.3 | 418 |
| bta-miR-2295 | -26.9 | 125 |
| bta-miR-2295 | -26.8 | 454 |
| bta-miR-2295 | -26.5 | 83  |
| bta-miR-2295 | -25.7 | 507 |
| bta-miR-2295 | -23.5 | 203 |
| bta-miR-2295 | -22.2 | 241 |
| bta-miR-2295 | -22.2 | 570 |
| bta-miR-2295 | -21.5 | 279 |
| bta-miR-2295 | -21.0 | 155 |
| bta-miR-2295 | -20.8 | 385 |
| bta-miR-2295 | -19.5 | 349 |
| bta-miR-2295 | -19.2 | 177 |
| bta-miR-2295 | -17.8 | 28  |
| bta-miR-2295 | -16.1 | 50  |
| bta-miR-2295 | -16.0 | 710 |
| bta-miR-2295 | -15.6 | 630 |
| bta-miR-2295 | -14.5 | 691 |
| bta-miR-2295 | -14.4 | 480 |
| bta-miR-2295 | -13.4 | 672 |
| bta-miR-2295 | -13.4 | 1   |
| bta-miR-2295 | -12.6 | 70  |
| bta-miR-2295 | -12.2 | 117 |
| bta-miR-2295 | -11.2 | 738 |
| bta-miR-2295 | -10.8 | 550 |
| bta-miR-2295 | -10.3 | 331 |
| bta-miR-2295 | -10.0 | 224 |
| bta-miR-2295 | -10.0 | 594 |
| bta-miR-2296 | -28.4 | 65  |
| bta-miR-2296 | -25.0 | 450 |
| bta-miR-2296 | -24.9 | 494 |

|              |       |     |
|--------------|-------|-----|
| bta-miR-2296 | -24.6 | 278 |
| bta-miR-2296 | -22.2 | 617 |
| bta-miR-2296 | -22.0 | 22  |
| bta-miR-2296 | -21.8 | 419 |
| bta-miR-2296 | -21.6 | 198 |
| bta-miR-2296 | -20.7 | 171 |
| bta-miR-2296 | -19.3 | 472 |
| bta-miR-2296 | -19.1 | 597 |
| bta-miR-2296 | -18.9 | 239 |
| bta-miR-2296 | -17.2 | 107 |
| bta-miR-2296 | -16.6 | 261 |
| bta-miR-2296 | -16.4 | 308 |
| bta-miR-2296 | -15.9 | 575 |
| bta-miR-2296 | -15.7 | 361 |
| bta-miR-2296 | -15.1 | 653 |
| bta-miR-2296 | -13.8 | 738 |
| bta-miR-2296 | -13.5 | 543 |
| bta-miR-2296 | -12.9 | 8   |
| bta-miR-2296 | -12.8 | 559 |
| bta-miR-2296 | -12.7 | 405 |
| bta-miR-2296 | -12.6 | 517 |
| bta-miR-2296 | -12.6 | 154 |
| bta-miR-2296 | -12.4 | 125 |
| bta-miR-2296 | -12.3 | 710 |
| bta-miR-2296 | -11.0 | 50  |
| bta-miR-2296 | -10.8 | 383 |
| bta-miR-2296 | -10.5 | 639 |
| bta-miR-2296 | -10.4 | 609 |
| bta-miR-2296 | -10.0 | 687 |
| bta-miR-2297 | -23.2 | 598 |
| bta-miR-2297 | -20.9 | 219 |
| bta-miR-2297 | -20.4 | 434 |
| bta-miR-2297 | -16.7 | 347 |
| bta-miR-2297 | -14.2 | 176 |
| bta-miR-2297 | -14.2 | 620 |
| bta-miR-2297 | -14.0 | 499 |
| bta-miR-2297 | -12.7 | 69  |
| bta-miR-2297 | -11.8 | 16  |
| bta-miR-2297 | -11.7 | 265 |
| bta-miR-2297 | -11.3 | 731 |
| bta-miR-2297 | -10.5 | 450 |
| bta-miR-2298 | -16.8 | 493 |
| bta-miR-2298 | -16.6 | 606 |
| bta-miR-2298 | -16.4 | 360 |
| bta-miR-2298 | -16.3 | 199 |
| bta-miR-2298 | -15.5 | 66  |
| bta-miR-2298 | -15.1 | 25  |
| bta-miR-2298 | -15.1 | 271 |
| bta-miR-2298 | -14.9 | 644 |
| bta-miR-2298 | -14.4 | 554 |
| bta-miR-2298 | -14.4 | 156 |
| bta-miR-2298 | -13.3 | 585 |
| bta-miR-2298 | -13.2 | 450 |
| bta-miR-2298 | -13.0 | 100 |
| bta-miR-2298 | -12.7 | 116 |
| bta-miR-2298 | -12.2 | 731 |
| bta-miR-2298 | -12.0 | 220 |
| bta-miR-2298 | -11.7 | 238 |
| bta-miR-2298 | -11.7 | 478 |

|                  |       |     |
|------------------|-------|-----|
| bta-miR-2298     | -11.3 | 4   |
| bta-miR-2298     | -10.9 | 531 |
| bta-miR-2298     | -10.2 | 344 |
| bta-miR-2298     | -10.1 | 415 |
| bta-miR-2298     | -10.0 | 46  |
| bta-miR-2299-5p  | -26.6 | 222 |
| bta-miR-2299-5p  | -21.4 | 442 |
| bta-miR-2299-5p  | -20.0 | 345 |
| bta-miR-2299-5p  | -19.6 | 495 |
| bta-miR-2299-5p  | -19.4 | 67  |
| bta-miR-2299-5p  | -18.9 | 607 |
| bta-miR-2299-5p  | -17.2 | 170 |
| bta-miR-2299-5p  | -16.9 | 200 |
| bta-miR-2299-5p  | -15.7 | 390 |
| bta-miR-2299-5p  | -14.9 | 263 |
| bta-miR-2299-5p  | -14.5 | 583 |
| bta-miR-2299-5p  | -13.9 | 626 |
| bta-miR-2299-5p  | -13.8 | 9   |
| bta-miR-2299-5p  | -13.4 | 720 |
| bta-miR-2299-5p  | -12.7 | 107 |
| bta-miR-2299-5p  | -11.3 | 476 |
| bta-miR-2299-5p  | -11.3 | 371 |
| bta-miR-2299-5p  | -11.1 | 241 |
| bta-miR-2299-5p  | -11.0 | 313 |
| bta-miR-2299-5p  | -10.9 | 334 |
| bta-miR-2299-5p  | -10.5 | 657 |
| bta-miR-2299-5p  | -10.4 | 187 |
| bta-miR-2299-3p  | -27.3 | 420 |
| bta-miR-2299-3p  | -26.3 | 86  |
| bta-miR-2299-3p  | -25.0 | 13  |
| bta-miR-2299-3p  | -24.0 | 457 |
| bta-miR-2299-3p  | -23.8 | 116 |
| bta-miR-2299-3p  | -23.4 | 231 |
| bta-miR-2299-3p  | -21.5 | 306 |
| bta-miR-2299-3p  | -20.0 | 493 |
| bta-miR-2299-3p  | -19.8 | 585 |
| bta-miR-2299-3p  | -19.7 | 367 |
| bta-miR-2299-3p  | -19.6 | 199 |
| bta-miR-2299-3p  | -19.5 | 560 |
| bta-miR-2299-3p  | -18.0 | 38  |
| bta-miR-2299-3p  | -17.9 | 617 |
| bta-miR-2299-3p  | -17.9 | 156 |
| bta-miR-2299-3p  | -17.1 | 343 |
| bta-miR-2299-3p  | -17.0 | 708 |
| bta-miR-2299-3p  | -16.3 | 256 |
| bta-miR-2299-3p  | -16.0 | 137 |
| bta-miR-2299-3p  | -14.5 | 514 |
| bta-miR-2299-3p  | -14.4 | 185 |
| bta-miR-2299-3p  | -13.7 | 658 |
| bta-miR-2299-3p  | -13.3 | 329 |
| bta-miR-2299-3p  | -13.3 | 738 |
| bta-miR-2299-3p  | -12.1 | 283 |
| bta-miR-2299-3p  | -11.7 | 481 |
| bta-miR-2299-3p  | -11.4 | 538 |
| bta-miR-2299-3p  | -11.1 | 606 |
| bta-miR-2299-3p  | -10.2 | 436 |
| bta-miR-2299-3p  | -10.1 | 686 |
| bta-miR-2300a-5p | -26.9 | 614 |
| bta-miR-2300a-5p | -25.5 | 448 |

|                  |       |     |
|------------------|-------|-----|
| bta-miR-2300a-5p | -22.5 | 418 |
| bta-miR-2300a-5p | -21.5 | 176 |
| bta-miR-2300a-5p | -19.8 | 69  |
| bta-miR-2300a-5p | -19.5 | 350 |
| bta-miR-2300a-5p | -18.0 | 731 |
| bta-miR-2300a-5p | -17.3 | 268 |
| bta-miR-2300a-5p | -17.1 | 598 |
| bta-miR-2300a-5p | -16.4 | 16  |
| bta-miR-2300a-5p | -15.8 | 570 |
| bta-miR-2300a-5p | -15.7 | 232 |
| bta-miR-2300a-5p | -13.9 | 101 |
| bta-miR-2300a-5p | -13.6 | 483 |
| bta-miR-2300a-5p | -13.1 | 633 |
| bta-miR-2300a-5p | -12.0 | 373 |
| bta-miR-2300a-5p | -11.9 | 506 |
| bta-miR-2300a-5p | -11.8 | 129 |
| bta-miR-2300a-5p | -11.5 | 556 |
| bta-miR-2300a-5p | -10.9 | 383 |
| bta-miR-2300a-5p | -10.6 | 1   |
| bta-miR-2300a-5p | -10.6 | 50  |
| bta-miR-2300a-5p | -10.4 | 698 |
| bta-miR-2300b-3p | -22.3 | 111 |
| bta-miR-2300b-3p | -22.1 | 401 |
| bta-miR-2300b-3p | -20.7 | 261 |
| bta-miR-2300b-3p | -20.5 | 168 |
| bta-miR-2300b-3p | -20.3 | 5   |
| bta-miR-2300b-3p | -20.1 | 559 |
| bta-miR-2300b-3p | -18.7 | 692 |
| bta-miR-2300b-3p | -17.3 | 511 |
| bta-miR-2300b-3p | -17.2 | 33  |
| bta-miR-2300b-3p | -16.9 | 58  |
| bta-miR-2300b-3p | -16.2 | 209 |
| bta-miR-2300b-3p | -16.1 | 650 |
| bta-miR-2300b-3p | -15.9 | 282 |
| bta-miR-2300b-3p | -15.8 | 596 |
| bta-miR-2300b-3p | -15.2 | 363 |
| bta-miR-2300b-3p | -14.7 | 467 |
| bta-miR-2300b-3p | -13.8 | 309 |
| bta-miR-2300b-3p | -13.5 | 540 |
| bta-miR-2300b-3p | -13.5 | 139 |
| bta-miR-2300b-3p | -13.0 | 737 |
| bta-miR-2300b-3p | -12.7 | 456 |
| bta-miR-2300b-3p | -12.3 | 155 |
| bta-miR-2300b-3p | -12.1 | 629 |
| bta-miR-2300b-3p | -11.8 | 491 |
| bta-miR-2300b-3p | -11.0 | 248 |
| bta-miR-2300b-3p | -11.0 | 395 |
| bta-miR-2300b-3p | -10.9 | 432 |
| bta-miR-2300b-3p | -10.4 | 583 |
| bta-miR-2284s    | -26.6 | 460 |
| bta-miR-2284s    | -24.2 | 60  |
| bta-miR-2284s    | -23.8 | 401 |
| bta-miR-2284s    | -22.2 | 97  |
| bta-miR-2284s    | -21.4 | 596 |
| bta-miR-2284s    | -21.2 | 258 |
| bta-miR-2284s    | -21.1 | 4   |
| bta-miR-2284s    | -18.7 | 24  |
| bta-miR-2284s    | -18.2 | 215 |
| bta-miR-2284s    | -17.6 | 566 |

|               |       |     |
|---------------|-------|-----|
| bta-miR-2284s | -17.2 | 369 |
| bta-miR-2284s | -16.5 | 622 |
| bta-miR-2284s | -16.1 | 650 |
| bta-miR-2284s | -15.8 | 730 |
| bta-miR-2284s | -15.5 | 342 |
| bta-miR-2284s | -15.4 | 173 |
| bta-miR-2284s | -15.3 | 692 |
| bta-miR-2284s | -14.5 | 140 |
| bta-miR-2284s | -14.2 | 490 |
| bta-miR-2284s | -12.2 | 432 |
| bta-miR-2284s | -11.9 | 120 |
| bta-miR-2284s | -11.5 | 311 |
| bta-miR-2284s | -11.2 | 551 |
| bta-miR-2284s | -11.1 | 191 |
| bta-miR-2284s | -11.0 | 204 |
| bta-miR-2284s | -10.9 | 635 |
| bta-miR-2284s | -10.4 | 51  |
| bta-miR-2301  | -26.8 | 446 |
| bta-miR-2301  | -22.4 | 114 |
| bta-miR-2301  | -21.5 | 174 |
| bta-miR-2301  | -20.9 | 227 |
| bta-miR-2301  | -19.6 | 614 |
| bta-miR-2301  | -19.1 | 499 |
| bta-miR-2301  | -18.2 | 265 |
| bta-miR-2301  | -18.0 | 68  |
| bta-miR-2301  | -18.0 | 479 |
| bta-miR-2301  | -17.9 | 348 |
| bta-miR-2301  | -17.7 | 36  |
| bta-miR-2301  | -17.3 | 11  |
| bta-miR-2301  | -16.8 | 418 |
| bta-miR-2301  | -15.1 | 563 |
| bta-miR-2301  | -14.4 | 403 |
| bta-miR-2301  | -14.3 | 598 |
| bta-miR-2301  | -13.3 | 371 |
| bta-miR-2301  | -13.0 | 154 |
| bta-miR-2301  | -13.0 | 313 |
| bta-miR-2301  | -12.7 | 338 |
| bta-miR-2301  | -12.7 | 736 |
| bta-miR-2301  | -12.4 | 659 |
| bta-miR-2301  | -12.0 | 94  |
| bta-miR-2301  | -11.9 | 218 |
| bta-miR-2301  | -11.8 | 129 |
| bta-miR-2301  | -11.5 | 143 |
| bta-miR-2301  | -11.5 | 197 |
| bta-miR-2301  | -10.0 | 575 |
| bta-miR-2302  | -29.8 | 477 |
| bta-miR-2302  | -29.6 | 82  |
| bta-miR-2302  | -29.0 | 416 |
| bta-miR-2302  | -28.2 | 448 |
| bta-miR-2302  | -25.3 | 231 |
| bta-miR-2302  | -25.1 | 173 |
| bta-miR-2302  | -24.0 | 14  |
| bta-miR-2302  | -23.8 | 369 |
| bta-miR-2302  | -23.6 | 576 |
| bta-miR-2302  | -22.7 | 621 |
| bta-miR-2302  | -22.5 | 267 |
| bta-miR-2302  | -21.4 | 155 |
| bta-miR-2302  | -21.1 | 497 |
| bta-miR-2302  | -21.0 | 547 |

|               |       |     |
|---------------|-------|-----|
| bta-miR-2302  | -19.5 | 40  |
| bta-miR-2302  | -17.6 | 307 |
| bta-miR-2302  | -17.5 | 127 |
| bta-miR-2302  | -17.1 | 660 |
| bta-miR-2302  | -17.1 | 395 |
| bta-miR-2302  | -15.6 | 322 |
| bta-miR-2302  | -15.4 | 597 |
| bta-miR-2302  | -15.3 | 61  |
| bta-miR-2302  | -14.8 | 356 |
| bta-miR-2302  | -14.6 | 337 |
| bta-miR-2302  | -14.6 | 683 |
| bta-miR-2302  | -14.2 | 615 |
| bta-miR-2302  | -13.0 | 523 |
| bta-miR-2302  | -12.7 | 740 |
| bta-miR-2302  | -12.0 | 251 |
| bta-miR-2302  | -11.9 | 641 |
| bta-miR-2302  | -11.6 | 703 |
| bta-miR-2302  | -10.4 | 2   |
| bta-miR-2302  | -10.2 | 539 |
| bta-miR-2303  | -17.8 | 263 |
| bta-miR-2303  | -15.8 | 182 |
| bta-miR-2303  | -15.6 | 495 |
| bta-miR-2303  | -15.1 | 4   |
| bta-miR-2303  | -15.1 | 44  |
| bta-miR-2303  | -14.9 | 87  |
| bta-miR-2303  | -14.1 | 376 |
| bta-miR-2303  | -13.4 | 597 |
| bta-miR-2303  | -13.2 | 433 |
| bta-miR-2303  | -12.4 | 692 |
| bta-miR-2303  | -12.3 | 206 |
| bta-miR-2303  | -12.3 | 544 |
| bta-miR-2303  | -12.1 | 343 |
| bta-miR-2303  | -12.1 | 617 |
| bta-miR-2303  | -12.1 | 639 |
| bta-miR-2303  | -11.9 | 516 |
| bta-miR-2303  | -11.7 | 128 |
| bta-miR-2303  | -11.7 | 476 |
| bta-miR-2303  | -11.5 | 170 |
| bta-miR-2303  | -11.4 | 224 |
| bta-miR-2303  | -11.3 | 410 |
| bta-miR-2303  | -11.3 | 451 |
| bta-miR-2303  | -11.3 | 742 |
| bta-miR-2303  | -10.6 | 294 |
| bta-miR-2303  | -10.5 | 393 |
| bta-miR-2285d | -17.2 | 51  |
| bta-miR-2285d | -15.8 | 483 |
| bta-miR-2285d | -15.0 | 596 |
| bta-miR-2285d | -14.4 | 429 |
| bta-miR-2285d | -13.9 | 237 |
| bta-miR-2285d | -13.6 | 2   |
| bta-miR-2285d | -13.6 | 283 |
| bta-miR-2285d | -13.5 | 650 |
| bta-miR-2285d | -13.4 | 331 |
| bta-miR-2285d | -13.4 | 669 |
| bta-miR-2285d | -13.2 | 408 |
| bta-miR-2285d | -12.1 | 520 |
| bta-miR-2285d | -12.0 | 563 |
| bta-miR-2285d | -11.9 | 200 |
| bta-miR-2285d | -11.7 | 164 |



|               |       |     |
|---------------|-------|-----|
| bta-miR-2285d | -11.6 | 126 |
| bta-miR-2285d | -11.5 | 30  |
| bta-miR-2285d | -11.5 | 626 |
| bta-miR-2285d | -11.5 | 99  |
| bta-miR-2285d | -11.3 | 698 |
| bta-miR-2285d | -11.3 | 277 |
| bta-miR-2285d | -11.1 | 457 |
| bta-miR-2285d | -10.9 | 308 |
| bta-miR-2285d | -10.1 | 725 |
| bta-miR-2304  | -21.0 | 148 |
| bta-miR-2304  | -20.5 | 109 |
| bta-miR-2304  | -19.4 | 488 |
| bta-miR-2304  | -18.5 | 415 |
| bta-miR-2304  | -16.8 | 586 |
| bta-miR-2304  | -16.7 | 381 |
| bta-miR-2304  | -16.4 | 319 |
| bta-miR-2304  | -16.1 | 353 |
| bta-miR-2304  | -15.9 | 10  |
| bta-miR-2304  | -15.9 | 46  |
| bta-miR-2304  | -15.8 | 560 |
| bta-miR-2304  | -15.6 | 228 |
| bta-miR-2304  | -15.5 | 128 |
| bta-miR-2304  | -15.3 | 185 |
| bta-miR-2304  | -15.3 | 469 |
| bta-miR-2304  | -14.7 | 84  |
| bta-miR-2304  | -13.3 | 647 |
| bta-miR-2304  | -12.5 | 298 |
| bta-miR-2304  | -12.3 | 66  |
| bta-miR-2304  | -12.1 | 269 |
| bta-miR-2304  | -11.7 | 739 |
| bta-miR-2304  | -11.4 | 698 |
| bta-miR-2304  | -10.8 | 170 |
| bta-miR-2304  | -10.6 | 454 |
| bta-miR-2304  | -10.2 | 620 |
| bta-miR-2305  | -37.5 | 316 |
| bta-miR-2305  | -33.4 | 134 |
| bta-miR-2305  | -29.8 | 396 |
| bta-miR-2305  | -27.6 | 245 |
| bta-miR-2305  | -27.4 | 110 |
| bta-miR-2305  | -25.1 | 31  |
| bta-miR-2305  | -24.0 | 190 |
| bta-miR-2305  | -23.4 | 461 |
| bta-miR-2305  | -22.4 | 561 |
| bta-miR-2305  | -22.0 | 362 |
| bta-miR-2305  | -21.4 | 284 |
| bta-miR-2305  | -19.4 | 511 |
| bta-miR-2305  | -18.7 | 74  |
| bta-miR-2305  | -17.5 | 625 |
| bta-miR-2305  | -16.5 | 2   |
| bta-miR-2305  | -15.7 | 665 |
| bta-miR-2305  | -15.5 | 484 |
| bta-miR-2305  | -15.4 | 691 |
| bta-miR-2305  | -13.7 | 740 |
| bta-miR-2305  | -13.5 | 537 |
| bta-miR-2305  | -13.0 | 165 |
| bta-miR-2305  | -12.9 | 342 |
| bta-miR-2305  | -12.8 | 585 |
| bta-miR-2305  | -11.3 | 270 |
| bta-miR-2305  | -11.1 | 641 |

|              |       |     |
|--------------|-------|-----|
| bta-miR-2305 | -10.5 | 213 |
| bta-miR-2305 | -10.1 | 96  |
| bta-miR-2306 | -31.7 | 395 |
| bta-miR-2306 | -27.8 | 96  |
| bta-miR-2306 | -23.4 | 7   |
| bta-miR-2306 | -22.9 | 583 |
| bta-miR-2306 | -22.3 | 257 |
| bta-miR-2306 | -22.0 | 209 |
| bta-miR-2306 | -21.7 | 62  |
| bta-miR-2306 | -21.6 | 436 |
| bta-miR-2306 | -21.5 | 610 |
| bta-miR-2306 | -21.1 | 365 |
| bta-miR-2306 | -21.0 | 473 |
| bta-miR-2306 | -17.6 | 498 |
| bta-miR-2306 | -17.3 | 544 |
| bta-miR-2306 | -17.1 | 644 |
| bta-miR-2306 | -16.8 | 34  |
| bta-miR-2306 | -15.2 | 630 |
| bta-miR-2306 | -15.1 | 167 |
| bta-miR-2306 | -14.8 | 140 |
| bta-miR-2306 | -14.5 | 344 |
| bta-miR-2306 | -13.3 | 737 |
| bta-miR-2306 | -12.9 | 575 |
| bta-miR-2306 | -12.8 | 89  |
| bta-miR-2306 | -12.7 | 703 |
| bta-miR-2306 | -12.4 | 191 |
| bta-miR-2306 | -11.7 | 293 |
| bta-miR-2306 | -10.8 | 461 |
| bta-miR-2306 | -10.5 | 123 |
| bta-miR-2307 | -21.9 | 262 |
| bta-miR-2307 | -21.3 | 624 |
| bta-miR-2307 | -19.6 | 475 |
| bta-miR-2307 | -19.1 | 37  |
| bta-miR-2307 | -18.6 | 9   |
| bta-miR-2307 | -18.3 | 67  |
| bta-miR-2307 | -17.7 | 167 |
| bta-miR-2307 | -17.0 | 200 |
| bta-miR-2307 | -16.5 | 613 |
| bta-miR-2307 | -15.6 | 447 |
| bta-miR-2307 | -14.5 | 285 |
| bta-miR-2307 | -14.2 | 520 |
| bta-miR-2307 | -13.8 | 415 |
| bta-miR-2307 | -13.7 | 371 |
| bta-miR-2307 | -13.7 | 126 |
| bta-miR-2307 | -13.2 | 586 |
| bta-miR-2307 | -12.4 | 235 |
| bta-miR-2307 | -11.7 | 436 |
| bta-miR-2307 | -11.6 | 107 |
| bta-miR-2307 | -11.5 | 542 |
| bta-miR-2307 | -11.3 | 654 |
| bta-miR-2307 | -11.0 | 344 |
| bta-miR-2307 | -11.0 | 502 |
| bta-miR-2307 | -10.9 | 737 |
| bta-miR-2307 | -10.7 | 464 |
| bta-miR-2307 | -10.4 | 218 |
| bta-miR-2308 | -25.8 | 1   |
| bta-miR-2308 | -23.7 | 109 |
| bta-miR-2308 | -23.5 | 393 |
| bta-miR-2308 | -22.6 | 73  |

|              |       |     |
|--------------|-------|-----|
| bta-miR-2308 | -21.0 | 576 |
| bta-miR-2308 | -20.9 | 211 |
| bta-miR-2308 | -20.8 | 262 |
| bta-miR-2308 | -20.5 | 473 |
| bta-miR-2308 | -20.1 | 57  |
| bta-miR-2308 | -19.7 | 138 |
| bta-miR-2308 | -19.4 | 537 |
| bta-miR-2308 | -17.5 | 39  |
| bta-miR-2308 | -17.2 | 624 |
| bta-miR-2308 | -17.1 | 185 |
| bta-miR-2308 | -16.7 | 428 |
| bta-miR-2308 | -16.6 | 283 |
| bta-miR-2308 | -15.8 | 678 |
| bta-miR-2308 | -15.7 | 341 |
| bta-miR-2308 | -15.6 | 519 |
| bta-miR-2308 | -15.1 | 657 |
| bta-miR-2308 | -13.5 | 739 |
| bta-miR-2308 | -13.4 | 562 |
| bta-miR-2308 | -13.4 | 696 |
| bta-miR-2308 | -13.2 | 315 |
| bta-miR-2308 | -13.0 | 491 |
| bta-miR-2308 | -12.9 | 364 |
| bta-miR-2308 | -12.6 | 380 |
| bta-miR-2308 | -11.4 | 172 |
| bta-miR-2308 | -11.4 | 606 |
| bta-miR-2308 | -10.1 | 33  |
| bta-miR-2308 | -10.1 | 504 |
| bta-miR-2309 | -30.5 | 561 |
| bta-miR-2309 | -29.7 | 90  |
| bta-miR-2309 | -29.5 | 307 |
| bta-miR-2309 | -27.0 | 126 |
| bta-miR-2309 | -26.3 | 33  |
| bta-miR-2309 | -25.7 | 247 |
| bta-miR-2309 | -25.7 | 409 |
| bta-miR-2309 | -24.8 | 457 |
| bta-miR-2309 | -21.8 | 191 |
| bta-miR-2309 | -21.7 | 362 |
| bta-miR-2309 | -21.7 | 156 |
| bta-miR-2309 | -20.9 | 582 |
| bta-miR-2309 | -19.9 | 502 |
| bta-miR-2309 | -16.6 | 2   |
| bta-miR-2309 | -16.5 | 287 |
| bta-miR-2309 | -16.3 | 658 |
| bta-miR-2309 | -16.1 | 684 |
| bta-miR-2309 | -15.6 | 328 |
| bta-miR-2309 | -15.1 | 231 |
| bta-miR-2309 | -14.9 | 388 |
| bta-miR-2309 | -14.6 | 639 |
| bta-miR-2309 | -14.5 | 483 |
| bta-miR-2309 | -13.9 | 524 |
| bta-miR-2309 | -13.8 | 266 |
| bta-miR-2309 | -12.9 | 740 |
| bta-miR-2309 | -12.9 | 545 |
| bta-miR-2309 | -12.5 | 618 |
| bta-miR-2309 | -10.4 | 185 |
| bta-miR-2309 | -10.1 | 73  |
| bta-miR-2310 | -23.4 | 349 |
| bta-miR-2310 | -21.6 | 268 |
| bta-miR-2310 | -20.0 | 453 |

|               |       |     |
|---------------|-------|-----|
| bta-miR-2310  | -19.0 | 154 |
| bta-miR-2310  | -18.5 | 101 |
| bta-miR-2310  | -17.6 | 598 |
| bta-miR-2310  | -16.7 | 480 |
| bta-miR-2310  | -16.3 | 177 |
| bta-miR-2310  | -15.6 | 224 |
| bta-miR-2310  | -15.1 | 326 |
| bta-miR-2310  | -15.0 | 405 |
| bta-miR-2310  | -14.8 | 499 |
| bta-miR-2310  | -14.3 | 16  |
| bta-miR-2310  | -14.0 | 69  |
| bta-miR-2310  | -12.9 | 620 |
| bta-miR-2310  | -12.6 | 138 |
| bta-miR-2310  | -12.5 | 303 |
| bta-miR-2310  | -12.0 | 727 |
| bta-miR-2310  | -11.8 | 650 |
| bta-miR-2310  | -11.6 | 429 |
| bta-miR-2310  | -10.5 | 558 |
| bta-miR-2310  | -10.4 | 204 |
| bta-miR-2310  | -10.3 | 49  |
| bta-miR-2310  | -10.0 | 320 |
| bta-miR-1603  | -18.1 | 102 |
| bta-miR-1603  | -17.3 | 196 |
| bta-miR-1603  | -17.2 | 349 |
| bta-miR-1603  | -16.0 | 149 |
| bta-miR-1603  | -15.7 | 592 |
| bta-miR-1603  | -14.6 | 442 |
| bta-miR-1603  | -14.6 | 326 |
| bta-miR-1603  | -14.3 | 69  |
| bta-miR-1603  | -14.0 | 652 |
| bta-miR-1603  | -13.9 | 221 |
| bta-miR-1603  | -13.8 | 470 |
| bta-miR-1603  | -13.7 | 267 |
| bta-miR-1603  | -13.6 | 411 |
| bta-miR-1603  | -13.5 | 11  |
| bta-miR-1603  | -13.3 | 726 |
| bta-miR-1603  | -13.3 | 124 |
| bta-miR-1603  | -13.2 | 504 |
| bta-miR-1603  | -12.8 | 556 |
| bta-miR-1603  | -12.1 | 300 |
| bta-miR-1603  | -11.9 | 49  |
| bta-miR-1603  | -11.5 | 486 |
| bta-miR-1603  | -10.5 | 172 |
| bta-miR-2284l | -18.9 | 470 |
| bta-miR-2284l | -18.7 | 506 |
| bta-miR-2284l | -17.8 | 357 |
| bta-miR-2284l | -17.6 | 162 |
| bta-miR-2284l | -17.0 | 402 |
| bta-miR-2284l | -16.7 | 28  |
| bta-miR-2284l | -16.3 | 108 |
| bta-miR-2284l | -16.1 | 232 |
| bta-miR-2284l | -15.7 | 273 |
| bta-miR-2284l | -15.7 | 557 |
| bta-miR-2284l | -15.5 | 47  |
| bta-miR-2284l | -15.5 | 418 |
| bta-miR-2284l | -15.4 | 659 |
| bta-miR-2284l | -15.3 | 91  |
| bta-miR-2284l | -14.8 | 689 |
| bta-miR-2284l | -14.6 | 308 |

|               |       |     |
|---------------|-------|-----|
| bta-miR-2284l | -14.5 | 620 |
| bta-miR-2284l | -14.4 | 581 |
| bta-miR-2284l | -14.1 | 431 |
| bta-miR-2284l | -14.0 | 176 |
| bta-miR-2284l | -14.0 | 592 |
| bta-miR-2284l | -13.7 | 724 |
| bta-miR-2284l | -13.6 | 11  |
| bta-miR-2284l | -13.6 | 338 |
| bta-miR-2284l | -13.6 | 706 |
| bta-miR-2284l | -13.3 | 327 |
| bta-miR-2284l | -13.1 | 196 |
| bta-miR-2284l | -12.8 | 453 |
| bta-miR-2284l | -11.3 | 142 |
| bta-miR-2284l | -11.1 | 385 |
| bta-miR-2284l | -10.1 | 79  |
| bta-miR-2284l | -10.1 | 215 |
| bta-miR-2284l | -10.0 | 320 |
| bta-miR-2489  | -22.6 | 570 |
| bta-miR-2489  | -21.4 | 17  |
| bta-miR-2489  | -20.9 | 129 |
| bta-miR-2489  | -19.5 | 256 |
| bta-miR-2489  | -18.9 | 92  |
| bta-miR-2489  | -18.5 | 349 |
| bta-miR-2489  | -18.5 | 622 |
| bta-miR-2489  | -18.0 | 455 |
| bta-miR-2489  | -17.2 | 418 |
| bta-miR-2489  | -17.1 | 49  |
| bta-miR-2489  | -17.0 | 273 |
| bta-miR-2489  | -16.5 | 247 |
| bta-miR-2489  | -16.4 | 313 |
| bta-miR-2489  | -16.3 | 371 |
| bta-miR-2489  | -16.0 | 2   |
| bta-miR-2489  | -15.3 | 178 |
| bta-miR-2489  | -14.8 | 546 |
| bta-miR-2489  | -14.7 | 204 |
| bta-miR-2489  | -14.7 | 508 |
| bta-miR-2489  | -14.5 | 395 |
| bta-miR-2489  | -14.1 | 701 |
| bta-miR-2489  | -13.2 | 329 |
| bta-miR-2489  | -13.0 | 586 |
| bta-miR-2489  | -12.9 | 672 |
| bta-miR-2489  | -12.9 | 154 |
| bta-miR-2489  | -12.2 | 737 |
| bta-miR-2489  | -12.1 | 648 |
| bta-miR-2489  | -12.0 | 531 |
| bta-miR-2489  | -11.5 | 235 |
| bta-miR-2489  | -11.1 | 165 |
| bta-miR-2489  | -10.7 | 305 |
| bta-miR-2489  | -10.3 | 71  |
| bta-miR-2311  | -22.6 | 593 |
| bta-miR-2311  | -22.4 | 367 |
| bta-miR-2311  | -21.6 | 483 |
| bta-miR-2311  | -20.7 | 119 |
| bta-miR-2311  | -20.2 | 429 |
| bta-miR-2311  | -19.6 | 53  |
| bta-miR-2311  | -19.4 | 408 |
| bta-miR-2311  | -19.3 | 234 |
| bta-miR-2311  | -19.2 | 160 |
| bta-miR-2311  | -18.3 | 9   |

|               |       |     |
|---------------|-------|-----|
| bta-miR-2311  | -16.8 | 649 |
| bta-miR-2311  | -16.7 | 341 |
| bta-miR-2311  | -16.7 | 271 |
| bta-miR-2311  | -16.5 | 453 |
| bta-miR-2311  | -16.4 | 199 |
| bta-miR-2311  | -16.3 | 510 |
| bta-miR-2311  | -15.9 | 624 |
| bta-miR-2311  | -15.4 | 563 |
| bta-miR-2311  | -15.2 | 28  |
| bta-miR-2311  | -14.1 | 109 |
| bta-miR-2311  | -13.2 | 306 |
| bta-miR-2311  | -12.9 | 86  |
| bta-miR-2311  | -11.9 | 669 |
| bta-miR-2311  | -11.8 | 138 |
| bta-miR-2311  | -11.5 | 536 |
| bta-miR-2311  | -11.3 | 218 |
| bta-miR-2311  | -10.7 | 705 |
| bta-miR-2311  | -10.6 | 609 |
| bta-miR-2311  | -10.0 | 473 |
| bta-miR-2284j | -18.3 | 366 |
| bta-miR-2284j | -16.9 | 405 |
| bta-miR-2284j | -15.4 | 60  |
| bta-miR-2284j | -15.3 | 166 |
| bta-miR-2284j | -15.1 | 507 |
| bta-miR-2284j | -15.1 | 621 |
| bta-miR-2284j | -14.9 | 273 |
| bta-miR-2284j | -14.9 | 443 |
| bta-miR-2284j | -14.9 | 470 |
| bta-miR-2284j | -14.7 | 592 |
| bta-miR-2284j | -14.4 | 111 |
| bta-miR-2284j | -14.4 | 11  |
| bta-miR-2284j | -14.0 | 338 |
| bta-miR-2284j | -13.7 | 423 |
| bta-miR-2284j | -13.1 | 308 |
| bta-miR-2284j | -12.6 | 706 |
| bta-miR-2284j | -12.5 | 91  |
| bta-miR-2284j | -12.5 | 196 |
| bta-miR-2284j | -12.4 | 724 |
| bta-miR-2284j | -11.6 | 229 |
| bta-miR-2284j | -11.5 | 81  |
| bta-miR-2284j | -11.3 | 581 |
| bta-miR-2284j | -10.9 | 24  |
| bta-miR-2284j | -10.9 | 216 |
| bta-miR-2284j | -10.4 | 48  |
| bta-miR-2284j | -10.4 | 124 |
| bta-miR-2284j | -10.4 | 546 |
| bta-miR-2284j | -10.3 | 490 |
| bta-miR-2312  | -14.1 | 611 |
| bta-miR-2312  | -13.9 | 657 |
| bta-miR-2312  | -13.6 | 2   |
| bta-miR-2312  | -13.3 | 449 |
| bta-miR-2312  | -12.8 | 265 |
| bta-miR-2312  | -12.2 | 47  |
| bta-miR-2312  | -11.8 | 530 |
| bta-miR-2312  | -11.2 | 405 |
| bta-miR-2312  | -10.7 | 36  |
| bta-miR-2312  | -10.7 | 597 |
| bta-miR-2312  | -10.5 | 225 |
| bta-miR-2312  | -10.4 | 291 |

|                |       |     |
|----------------|-------|-----|
| bta-miR-2312   | -10.3 | 551 |
| bta-miR-2312   | -10.0 | 202 |
| bta-miR-2313   | -26.1 | 248 |
| bta-miR-2313   | -26.1 | 408 |
| bta-miR-2313   | -25.0 | 473 |
| bta-miR-2313   | -24.3 | 562 |
| bta-miR-2313   | -24.2 | 88  |
| bta-miR-2313   | -24.0 | 167 |
| bta-miR-2313   | -22.9 | 360 |
| bta-miR-2313   | -22.7 | 502 |
| bta-miR-2313   | -22.2 | 624 |
| bta-miR-2313   | -20.9 | 3   |
| bta-miR-2313   | -20.7 | 30  |
| bta-miR-2313   | -18.0 | 426 |
| bta-miR-2313   | -17.7 | 206 |
| bta-miR-2313   | -17.7 | 276 |
| bta-miR-2313   | -16.1 | 697 |
| bta-miR-2313   | -16.0 | 654 |
| bta-miR-2313   | -15.7 | 531 |
| bta-miR-2313   | -15.0 | 307 |
| bta-miR-2313   | -14.9 | 231 |
| bta-miR-2313   | -14.9 | 126 |
| bta-miR-2313   | -14.9 | 457 |
| bta-miR-2313   | -14.3 | 191 |
| bta-miR-2313   | -13.4 | 395 |
| bta-miR-2313   | -12.2 | 606 |
| bta-miR-2313   | -11.9 | 69  |
| bta-miR-2313   | -11.0 | 21  |
| bta-miR-2313   | -10.8 | 155 |
| bta-miR-2313   | -10.4 | 285 |
| bta-miR-2313*  | -25.2 | 488 |
| bta-miR-2313*  | -24.7 | 66  |
| bta-miR-2313*  | -24.6 | 605 |
| bta-miR-2313*  | -22.8 | 408 |
| bta-miR-2313*  | -20.9 | 167 |
| bta-miR-2313*  | -20.8 | 17  |
| bta-miR-2313*  | -19.9 | 654 |
| bta-miR-2313*  | -18.4 | 266 |
| bta-miR-2313*  | -18.1 | 354 |
| bta-miR-2313*  | -17.9 | 424 |
| bta-miR-2313*  | -16.1 | 464 |
| bta-miR-2313*  | -15.9 | 107 |
| bta-miR-2313*  | -15.8 | 576 |
| bta-miR-2313*  | -15.8 | 544 |
| bta-miR-2313*  | -15.3 | 199 |
| bta-miR-2313*  | -15.3 | 518 |
| bta-miR-2313*  | -14.2 | 376 |
| bta-miR-2313*  | -13.1 | 230 |
| bta-miR-2313*  | -12.7 | 729 |
| bta-miR-2313*  | -11.8 | 305 |
| bta-miR-2313*  | -10.7 | 697 |
| bta-miR-2313*  | -10.5 | 119 |
| bta-miR-2313*  | -10.4 | 4   |
| bta-miR-2284t* | -18.5 | 240 |
| bta-miR-2284t* | -17.8 | 349 |
| bta-miR-2284t* | -17.7 | 506 |
| bta-miR-2284t* | -17.5 | 11  |
| bta-miR-2284t* | -17.5 | 28  |
| bta-miR-2284t* | -17.1 | 429 |

|                |       |     |
|----------------|-------|-----|
| bta-miR-2284t* | -16.8 | 620 |
| bta-miR-2284t* | -16.2 | 405 |
| bta-miR-2284t* | -15.8 | 166 |
| bta-miR-2284t* | -14.8 | 470 |
| bta-miR-2284t* | -14.5 | 541 |
| bta-miR-2284t* | -14.1 | 261 |
| bta-miR-2284t* | -14.0 | 69  |
| bta-miR-2284t* | -13.9 | 215 |
| bta-miR-2284t* | -13.6 | 652 |
| bta-miR-2284t* | -13.3 | 273 |
| bta-miR-2284t* | -13.3 | 108 |
| bta-miR-2284t* | -12.7 | 557 |
| bta-miR-2284t* | -12.7 | 596 |
| bta-miR-2284t* | -12.2 | 581 |
| bta-miR-2284t* | -12.0 | 327 |
| bta-miR-2284t* | -11.6 | 91  |
| bta-miR-2284t* | -11.3 | 308 |
| bta-miR-2284t* | -11.1 | 47  |
| bta-miR-2284t* | -11.1 | 460 |
| bta-miR-2284t* | -10.9 | 196 |
| bta-miR-2284t* | -10.7 | 223 |
| bta-miR-2284t* | -10.7 | 442 |
| bta-miR-2284t* | -10.3 | 124 |
| bta-miR-2284t* | -10.3 | 320 |
| bta-miR-2284t* | -10.1 | 735 |
| bta-miR-2284t  | -19.1 | 331 |
| bta-miR-2284t  | -17.1 | 483 |
| bta-miR-2284t  | -16.3 | 199 |
| bta-miR-2284t  | -15.4 | 126 |
| bta-miR-2284t  | -15.1 | 596 |
| bta-miR-2284t  | -15.1 | 51  |
| bta-miR-2284t  | -14.7 | 156 |
| bta-miR-2284t  | -14.1 | 425 |
| bta-miR-2284t  | -13.7 | 8   |
| bta-miR-2284t  | -13.5 | 618 |
| bta-miR-2284t  | -13.1 | 374 |
| bta-miR-2284t  | -13.1 | 669 |
| bta-miR-2284t  | -12.9 | 299 |
| bta-miR-2284t  | -12.9 | 350 |
| bta-miR-2284t  | -12.5 | 698 |
| bta-miR-2284t  | -12.2 | 468 |
| bta-miR-2284t  | -12.0 | 515 |
| bta-miR-2284t  | -11.9 | 277 |
| bta-miR-2284t  | -11.8 | 99  |
| bta-miR-2284t  | -11.5 | 556 |
| bta-miR-2284t  | -11.4 | 535 |
| bta-miR-2284t  | -11.2 | 645 |
| bta-miR-2284t  | -11.1 | 244 |
| bta-miR-2284t  | -10.8 | 71  |
| bta-miR-2284t  | -10.6 | 408 |
| bta-miR-2284t  | -10.6 | 34  |
| bta-miR-2284t  | -10.0 | 361 |
| bta-miR-2285b  | -17.8 | 263 |
| bta-miR-2285b  | -15.8 | 5   |
| bta-miR-2285b  | -15.1 | 200 |
| bta-miR-2285b  | -14.8 | 34  |
| bta-miR-2285b  | -14.4 | 169 |
| bta-miR-2285b  | -14.3 | 613 |
| bta-miR-2285b  | -14.2 | 78  |



|               |       |     |
|---------------|-------|-----|
| bta-miR-2285b | -14.0 | 704 |
| bta-miR-2285b | -13.9 | 127 |
| bta-miR-2285b | -13.8 | 237 |
| bta-miR-2285b | -13.6 | 596 |
| bta-miR-2285b | -12.8 | 652 |
| bta-miR-2285b | -12.5 | 572 |
| bta-miR-2285b | -12.5 | 384 |
| bta-miR-2285b | -12.3 | 484 |
| bta-miR-2285b | -12.2 | 539 |
| bta-miR-2285b | -12.0 | 143 |
| bta-miR-2285b | -12.0 | 449 |
| bta-miR-2285b | -11.8 | 99  |
| bta-miR-2285b | -11.4 | 468 |
| bta-miR-2285b | -11.3 | 331 |
| bta-miR-2285b | -10.8 | 431 |
| bta-miR-2285b | -10.7 | 409 |
| bta-miR-2285b | -10.3 | 16  |
| bta-miR-2314  | -22.1 | 44  |
| bta-miR-2314  | -21.4 | 252 |
| bta-miR-2314  | -20.8 | 598 |
| bta-miR-2314  | -20.6 | 4   |
| bta-miR-2314  | -20.3 | 482 |
| bta-miR-2314  | -19.9 | 410 |
| bta-miR-2314  | -18.0 | 85  |
| bta-miR-2314  | -17.4 | 645 |
| bta-miR-2314  | -16.9 | 566 |
| bta-miR-2314  | -16.5 | 198 |
| bta-miR-2314  | -16.1 | 620 |
| bta-miR-2314  | -15.9 | 165 |
| bta-miR-2314  | -15.2 | 277 |
| bta-miR-2314  | -15.2 | 449 |
| bta-miR-2314  | -15.0 | 377 |
| bta-miR-2314  | -12.8 | 140 |
| bta-miR-2314  | -11.8 | 389 |
| bta-miR-2314  | -11.6 | 344 |
| bta-miR-2314  | -11.4 | 26  |
| bta-miR-2314  | -10.9 | 544 |
| bta-miR-2314  | -10.9 | 692 |
| bta-miR-2314  | -10.5 | 516 |
| bta-miR-2314  | -10.4 | 182 |
| bta-miR-2314  | -10.3 | 222 |
| bta-miR-2315  | -22.0 | 462 |
| bta-miR-2315  | -19.5 | 91  |
| bta-miR-2315  | -18.3 | 409 |
| bta-miR-2315  | -18.1 | 164 |
| bta-miR-2315  | -18.0 | 41  |
| bta-miR-2315  | -17.6 | 232 |
| bta-miR-2315  | -16.6 | 515 |
| bta-miR-2315  | -16.1 | 376 |
| bta-miR-2315  | -16.0 | 480 |
| bta-miR-2315  | -14.6 | 205 |
| bta-miR-2315  | -14.5 | 263 |
| bta-miR-2315  | -14.5 | 572 |
| bta-miR-2315  | -14.4 | 663 |
| bta-miR-2315  | -14.0 | 127 |
| bta-miR-2315  | -13.7 | 9   |
| bta-miR-2315  | -12.7 | 622 |
| bta-miR-2315  | -12.7 | 596 |
| bta-miR-2315  | -12.4 | 546 |

|               |       |     |
|---------------|-------|-----|
| bta-miR-2315  | -12.2 | 495 |
| bta-miR-2315  | -12.0 | 325 |
| bta-miR-2315  | -11.9 | 392 |
| bta-miR-2315  | -11.8 | 305 |
| bta-miR-2315  | -11.8 | 734 |
| bta-miR-2315  | -11.5 | 67  |
| bta-miR-2315  | -11.4 | 358 |
| bta-miR-2315  | -10.9 | 431 |
| bta-miR-2284d | -20.3 | 357 |
| bta-miR-2284d | -18.1 | 102 |
| bta-miR-2284d | -17.9 | 166 |
| bta-miR-2284d | -17.5 | 405 |
| bta-miR-2284d | -16.5 | 260 |
| bta-miR-2284d | -16.4 | 429 |
| bta-miR-2284d | -16.4 | 506 |
| bta-miR-2284d | -16.1 | 47  |
| bta-miR-2284d | -15.5 | 470 |
| bta-miR-2284d | -15.2 | 441 |
| bta-miR-2284d | -15.1 | 273 |
| bta-miR-2284d | -14.3 | 240 |
| bta-miR-2284d | -14.1 | 620 |
| bta-miR-2284d | -14.1 | 188 |
| bta-miR-2284d | -14.1 | 306 |
| bta-miR-2284d | -13.8 | 327 |
| bta-miR-2284d | -13.5 | 90  |
| bta-miR-2284d | -12.9 | 689 |
| bta-miR-2284d | -12.8 | 710 |
| bta-miR-2284d | -12.6 | 28  |
| bta-miR-2284d | -12.3 | 570 |
| bta-miR-2284d | -12.1 | 214 |
| bta-miR-2284d | -11.4 | 81  |
| bta-miR-2284d | -11.2 | 596 |
| bta-miR-2284d | -10.9 | 124 |
| bta-miR-2284d | -10.4 | 223 |
| bta-miR-2284d | -10.2 | 320 |
| bta-miR-2284d | -10.2 | 340 |
| bta-miR-2284d | -10.0 | 157 |
| bta-miR-2316  | -31.5 | 402 |
| bta-miR-2316  | -27.1 | 246 |
| bta-miR-2316  | -26.9 | 60  |
| bta-miR-2316  | -26.8 | 426 |
| bta-miR-2316  | -26.7 | 581 |
| bta-miR-2316  | -26.6 | 2   |
| bta-miR-2316  | -25.0 | 561 |
| bta-miR-2316  | -24.4 | 86  |
| bta-miR-2316  | -23.6 | 163 |
| bta-miR-2316  | -23.5 | 33  |
| bta-miR-2316  | -23.2 | 457 |
| bta-miR-2316  | -21.7 | 192 |
| bta-miR-2316  | -21.6 | 491 |
| bta-miR-2316  | -21.6 | 116 |
| bta-miR-2316  | -21.4 | 617 |
| bta-miR-2316  | -20.5 | 135 |
| bta-miR-2316  | -19.2 | 330 |
| bta-miR-2316  | -17.7 | 654 |
| bta-miR-2316  | -16.8 | 307 |
| bta-miR-2316  | -16.7 | 386 |
| bta-miR-2316  | -14.3 | 681 |
| bta-miR-2316  | -13.2 | 482 |

|               |       |     |
|---------------|-------|-----|
| bta-miR-2316  | -12.7 | 236 |
| bta-miR-2316  | -12.7 | 740 |
| bta-miR-2316  | -11.6 | 530 |
| bta-miR-2316  | -11.3 | 451 |
| bta-miR-2316  | -10.4 | 177 |
| bta-miR-2316  | -10.0 | 21  |
| bta-miR-2317  | -18.7 | 81  |
| bta-miR-2317  | -18.7 | 7   |
| bta-miR-2317  | -18.2 | 459 |
| bta-miR-2317  | -18.1 | 277 |
| bta-miR-2317  | -18.1 | 38  |
| bta-miR-2317  | -17.2 | 616 |
| bta-miR-2317  | -16.3 | 257 |
| bta-miR-2317  | -15.9 | 597 |
| bta-miR-2317  | -15.7 | 343 |
| bta-miR-2317  | -15.1 | 658 |
| bta-miR-2317  | -15.0 | 538 |
| bta-miR-2317  | -14.9 | 217 |
| bta-miR-2317  | -14.1 | 182 |
| bta-miR-2317  | -13.5 | 423 |
| bta-miR-2317  | -12.4 | 112 |
| bta-miR-2317  | -12.4 | 374 |
| bta-miR-2317  | -12.3 | 516 |
| bta-miR-2317  | -11.5 | 575 |
| bta-miR-2317  | -10.6 | 488 |
| bta-miR-2317  | -10.4 | 395 |
| bta-miR-2317  | -10.3 | 154 |
| bta-miR-2317  | -10.3 | 144 |
| bta-miR-2317  | -10.2 | 443 |
| bta-miR-2317  | -10.1 | 740 |
| bta-miR-1343  | -36.4 | 109 |
| bta-miR-1343  | -35.3 | 426 |
| bta-miR-1343  | -33.8 | 468 |
| bta-miR-1343  | -33.4 | 163 |
| bta-miR-1343  | -32.3 | 60  |
| bta-miR-1343  | -30.8 | 5   |
| bta-miR-1343  | -27.8 | 606 |
| bta-miR-1343  | -27.6 | 259 |
| bta-miR-1343  | -25.6 | 564 |
| bta-miR-1343  | -23.8 | 307 |
| bta-miR-1343  | -23.3 | 402 |
| bta-miR-1343  | -22.9 | 363 |
| bta-miR-1343  | -22.0 | 235 |
| bta-miR-1343  | -19.8 | 503 |
| bta-miR-1343  | -18.4 | 328 |
| bta-miR-1343  | -18.0 | 139 |
| bta-miR-1343  | -17.3 | 657 |
| bta-miR-1343  | -17.2 | 199 |
| bta-miR-1343  | -17.2 | 587 |
| bta-miR-1343  | -16.1 | 695 |
| bta-miR-1343  | -15.7 | 631 |
| bta-miR-1343  | -15.3 | 738 |
| bta-miR-1343  | -15.1 | 537 |
| bta-miR-1343  | -13.3 | 519 |
| bta-miR-1343  | -11.8 | 96  |
| bta-miR-1343  | -11.3 | 38  |
| bta-miR-1343  | -10.8 | 155 |
| bta-miR-1343* | -35.9 | 614 |
| bta-miR-1343* | -29.1 | 265 |

|               |       |     |
|---------------|-------|-----|
| bta-miR-1343* | -24.8 | 450 |
| bta-miR-1343* | -23.8 | 16  |
| bta-miR-1343* | -23.4 | 221 |
| bta-miR-1343* | -23.2 | 411 |
| bta-miR-1343* | -22.4 | 80  |
| bta-miR-1343* | -22.3 | 348 |
| bta-miR-1343* | -20.5 | 497 |
| bta-miR-1343* | -20.2 | 584 |
| bta-miR-1343* | -18.9 | 155 |
| bta-miR-1343* | -18.7 | 109 |
| bta-miR-1343* | -18.0 | 376 |
| bta-miR-1343* | -17.5 | 659 |
| bta-miR-1343* | -17.4 | 69  |
| bta-miR-1343* | -15.6 | 201 |
| bta-miR-1343* | -14.9 | 244 |
| bta-miR-1343* | -14.6 | 126 |
| bta-miR-1343* | -13.8 | 251 |
| bta-miR-1343* | -13.6 | 329 |
| bta-miR-1343* | -13.5 | 544 |
| bta-miR-1343* | -13.4 | 308 |
| bta-miR-1343* | -13.4 | 176 |
| bta-miR-1343* | -13.2 | 141 |
| bta-miR-1343* | -12.8 | 323 |
| bta-miR-1343* | -12.7 | 1   |
| bta-miR-1343* | -12.5 | 482 |
| bta-miR-1343* | -12.1 | 517 |
| bta-miR-1343* | -11.7 | 697 |
| bta-miR-1343* | -11.4 | 116 |
| bta-miR-1343* | -10.8 | 441 |
| bta-miR-1343* | -10.2 | 51  |
| bta-miR-1343* | -10.2 | 737 |
| bta-miR-2318  | -16.6 | 8   |
| bta-miR-2318  | -15.7 | 277 |
| bta-miR-2318  | -13.7 | 576 |
| bta-miR-2318  | -12.9 | 200 |
| bta-miR-2318  | -12.8 | 371 |
| bta-miR-2318  | -12.2 | 38  |
| bta-miR-2318  | -12.1 | 464 |
| bta-miR-2318  | -12.0 | 126 |
| bta-miR-2318  | -11.5 | 629 |
| bta-miR-2318  | -11.4 | 681 |
| bta-miR-2318  | -11.3 | 235 |
| bta-miR-2318  | -10.9 | 89  |
| bta-miR-2318  | -10.6 | 617 |
| bta-miR-2318  | -10.2 | 344 |
| bta-miR-2318  | -10.1 | 544 |
| bta-miR-2318  | -10.0 | 175 |
| bta-miR-2319a | -22.9 | 421 |
| bta-miR-2319a | -21.0 | 356 |
| bta-miR-2319a | -19.8 | 584 |
| bta-miR-2319a | -19.5 | 78  |
| bta-miR-2319a | -18.6 | 477 |
| bta-miR-2319a | -18.0 | 3   |
| bta-miR-2319a | -17.9 | 186 |
| bta-miR-2319a | -17.5 | 112 |
| bta-miR-2319a | -17.1 | 41  |
| bta-miR-2319a | -16.0 | 604 |
| bta-miR-2319a | -15.6 | 517 |
| bta-miR-2319a | -15.0 | 216 |

|               |       |     |
|---------------|-------|-----|
| bta-miR-2319a | -14.3 | 394 |
| bta-miR-2319a | -14.1 | 558 |
| bta-miR-2319a | -14.0 | 621 |
| bta-miR-2319a | -13.9 | 342 |
| bta-miR-2319a | -13.8 | 240 |
| bta-miR-2319a | -13.4 | 167 |
| bta-miR-2319a | -12.4 | 650 |
| bta-miR-2319a | -12.2 | 20  |
| bta-miR-2319a | -12.0 | 307 |
| bta-miR-2319a | -11.4 | 152 |
| bta-miR-2319a | -11.2 | 271 |
| bta-miR-2319a | -11.0 | 740 |
| bta-miR-2319a | -10.6 | 379 |
| bta-miR-2319a | -10.2 | 697 |
| bta-miR-2319b | -22.7 | 421 |
| bta-miR-2319b | -20.9 | 356 |
| bta-miR-2319b | -19.8 | 584 |
| bta-miR-2319b | -19.5 | 78  |
| bta-miR-2319b | -18.6 | 477 |
| bta-miR-2319b | -17.9 | 186 |
| bta-miR-2319b | -17.9 | 3   |
| bta-miR-2319b | -17.5 | 112 |
| bta-miR-2319b | -17.1 | 41  |
| bta-miR-2319b | -15.6 | 517 |
| bta-miR-2319b | -15.3 | 619 |
| bta-miR-2319b | -14.9 | 216 |
| bta-miR-2319b | -14.1 | 558 |
| bta-miR-2319b | -13.9 | 342 |
| bta-miR-2319b | -13.6 | 267 |
| bta-miR-2319b | -13.4 | 167 |
| bta-miR-2319b | -13.0 | 606 |
| bta-miR-2319b | -12.6 | 411 |
| bta-miR-2319b | -12.4 | 650 |
| bta-miR-2319b | -12.2 | 20  |
| bta-miR-2319b | -12.0 | 307 |
| bta-miR-2319b | -11.4 | 152 |
| bta-miR-2319b | -11.3 | 240 |
| bta-miR-2319b | -11.0 | 740 |
| bta-miR-2319b | -10.6 | 379 |
| bta-miR-2319b | -10.2 | 697 |
| bta-miR-2320  | -31.6 | 408 |
| bta-miR-2320  | -29.0 | 563 |
| bta-miR-2320  | -28.4 | 364 |
| bta-miR-2320  | -27.8 | 6   |
| bta-miR-2320  | -26.0 | 92  |
| bta-miR-2320  | -25.1 | 483 |
| bta-miR-2320  | -22.9 | 606 |
| bta-miR-2320  | -22.0 | 61  |
| bta-miR-2320  | -21.2 | 436 |
| bta-miR-2320  | -21.2 | 167 |
| bta-miR-2320  | -20.7 | 237 |
| bta-miR-2320  | -19.6 | 261 |
| bta-miR-2320  | -17.8 | 517 |
| bta-miR-2320  | -17.7 | 730 |
| bta-miR-2320  | -17.6 | 126 |
| bta-miR-2320  | -17.0 | 199 |
| bta-miR-2320  | -16.4 | 342 |
| bta-miR-2320  | -16.3 | 698 |
| bta-miR-2320  | -16.1 | 653 |

|               |       |     |
|---------------|-------|-----|
| bta-miR-2320  | -15.3 | 311 |
| bta-miR-2320  | -14.3 | 387 |
| bta-miR-2320  | -13.9 | 537 |
| bta-miR-2320  | -13.7 | 221 |
| bta-miR-2320  | -13.0 | 591 |
| bta-miR-2320  | -12.9 | 473 |
| bta-miR-2320  | -11.5 | 327 |
| bta-miR-2320  | -11.3 | 51  |
| bta-miR-2320  | -11.1 | 187 |
| bta-miR-2320  | -10.2 | 639 |
| bta-miR-2320* | -23.1 | 470 |
| bta-miR-2320* | -21.3 | 599 |
| bta-miR-2320* | -20.6 | 414 |
| bta-miR-2320* | -20.4 | 80  |
| bta-miR-2320* | -19.4 | 264 |
| bta-miR-2320* | -19.1 | 199 |
| bta-miR-2320* | -18.4 | 11  |
| bta-miR-2320* | -18.3 | 446 |
| bta-miR-2320* | -18.0 | 66  |
| bta-miR-2320* | -17.8 | 103 |
| bta-miR-2320* | -17.4 | 557 |
| bta-miR-2320* | -17.2 | 371 |
| bta-miR-2320* | -17.1 | 494 |
| bta-miR-2320* | -16.8 | 628 |
| bta-miR-2320* | -15.6 | 159 |
| bta-miR-2320* | -15.3 | 216 |
| bta-miR-2320* | -15.0 | 51  |
| bta-miR-2320* | -14.4 | 735 |
| bta-miR-2320* | -14.4 | 652 |
| bta-miR-2320* | -13.3 | 350 |
| bta-miR-2320* | -12.8 | 507 |
| bta-miR-2320* | -11.6 | 303 |
| bta-miR-2320* | -11.3 | 124 |
| bta-miR-2320* | -11.0 | 238 |
| bta-miR-2320* | -10.6 | 333 |
| bta-miR-2320* | -10.4 | 622 |
| bta-miR-2284n | -15.1 | 405 |
| bta-miR-2284n | -15.0 | 240 |
| bta-miR-2284n | -15.0 | 506 |
| bta-miR-2284n | -14.5 | 108 |
| bta-miR-2284n | -14.5 | 166 |
| bta-miR-2284n | -14.4 | 620 |
| bta-miR-2284n | -14.2 | 366 |
| bta-miR-2284n | -14.0 | 273 |
| bta-miR-2284n | -13.6 | 338 |
| bta-miR-2284n | -13.6 | 47  |
| bta-miR-2284n | -13.4 | 724 |
| bta-miR-2284n | -13.0 | 429 |
| bta-miR-2284n | -12.8 | 470 |
| bta-miR-2284n | -12.8 | 308 |
| bta-miR-2284n | -12.7 | 11  |
| bta-miR-2284n | -12.5 | 596 |
| bta-miR-2284n | -12.4 | 28  |
| bta-miR-2284n | -11.2 | 460 |
| bta-miR-2284n | -10.8 | 557 |
| bta-miR-2284n | -10.7 | 91  |
| bta-miR-2284n | -10.7 | 196 |
| bta-miR-2284n | -10.6 | 574 |
| bta-miR-2284n | -10.5 | 490 |

|               |       |     |
|---------------|-------|-----|
| bta-miR-2284n | -10.4 | 124 |
| bta-miR-2284n | -10.3 | 327 |
| bta-miR-2284n | -10.2 | 215 |
| bta-miR-2284g | -18.2 | 11  |
| bta-miR-2284g | -18.1 | 443 |
| bta-miR-2284g | -17.9 | 414 |
| bta-miR-2284g | -17.6 | 166 |
| bta-miR-2284g | -17.0 | 47  |
| bta-miR-2284g | -16.3 | 620 |
| bta-miR-2284g | -15.9 | 220 |
| bta-miR-2284g | -15.4 | 102 |
| bta-miR-2284g | -15.4 | 470 |
| bta-miR-2284g | -15.0 | 196 |
| bta-miR-2284g | -15.0 | 265 |
| bta-miR-2284g | -14.9 | 83  |
| bta-miR-2284g | -14.4 | 308 |
| bta-miR-2284g | -14.3 | 586 |
| bta-miR-2284g | -14.0 | 239 |
| bta-miR-2284g | -14.0 | 124 |
| bta-miR-2284g | -13.8 | 563 |
| bta-miR-2284g | -13.3 | 405 |
| bta-miR-2284g | -12.8 | 361 |
| bta-miR-2284g | -12.6 | 604 |
| bta-miR-2284g | -12.6 | 338 |
| bta-miR-2284g | -12.4 | 178 |
| bta-miR-2284g | -12.3 | 496 |
| bta-miR-2284g | -11.8 | 735 |
| bta-miR-2284g | -11.7 | 153 |
| bta-miR-2284g | -11.6 | 434 |
| bta-miR-2284g | -11.5 | 28  |
| bta-miR-2284g | -11.2 | 279 |
| bta-miR-2284g | -10.9 | 663 |
| bta-miR-2284g | -10.2 | 36  |
| bta-miR-2284g | -10.0 | 698 |
| bta-miR-2321  | -18.9 | 351 |
| bta-miR-2321  | -18.5 | 171 |
| bta-miR-2321  | -18.0 | 449 |
| bta-miR-2321  | -18.0 | 558 |
| bta-miR-2321  | -17.8 | 731 |
| bta-miR-2321  | -17.7 | 197 |
| bta-miR-2321  | -17.3 | 114 |
| bta-miR-2321  | -17.1 | 46  |
| bta-miR-2321  | -16.3 | 405 |
| bta-miR-2321  | -16.1 | 10  |
| bta-miR-2321  | -15.8 | 573 |
| bta-miR-2321  | -15.4 | 505 |
| bta-miR-2321  | -15.2 | 100 |
| bta-miR-2321  | -15.2 | 471 |
| bta-miR-2321  | -15.0 | 332 |
| bta-miR-2321  | -14.2 | 149 |
| bta-miR-2321  | -14.0 | 228 |
| bta-miR-2321  | -13.9 | 603 |
| bta-miR-2321  | -13.7 | 419 |
| bta-miR-2321  | -13.2 | 79  |
| bta-miR-2321  | -13.0 | 164 |
| bta-miR-2321  | -12.9 | 312 |
| bta-miR-2321  | -12.9 | 651 |
| bta-miR-2321  | -11.6 | 272 |
| bta-miR-2321  | -11.5 | 698 |

|               |       |     |
|---------------|-------|-----|
| bta-miR-2321  | -10.7 | 595 |
| bta-miR-1721  | -20.6 | 626 |
| bta-miR-1721  | -19.6 | 39  |
| bta-miR-1721  | -19.1 | 200 |
| bta-miR-1721  | -19.1 | 276 |
| bta-miR-1721  | -17.6 | 476 |
| bta-miR-1721  | -17.5 | 502 |
| bta-miR-1721  | -17.2 | 376 |
| bta-miR-1721  | -15.4 | 139 |
| bta-miR-1721  | -15.1 | 9   |
| bta-miR-1721  | -14.9 | 567 |
| bta-miR-1721  | -14.7 | 98  |
| bta-miR-1721  | -14.3 | 396 |
| bta-miR-1721  | -13.9 | 262 |
| bta-miR-1721  | -13.6 | 345 |
| bta-miR-1721  | -13.4 | 654 |
| bta-miR-1721  | -13.4 | 692 |
| bta-miR-1721  | -12.7 | 597 |
| bta-miR-1721  | -12.5 | 232 |
| bta-miR-1721  | -12.1 | 177 |
| bta-miR-1721  | -12.0 | 310 |
| bta-miR-1721  | -12.0 | 533 |
| bta-miR-1721  | -11.5 | 67  |
| bta-miR-1721  | -10.9 | 450 |
| bta-miR-2322  | -22.1 | 614 |
| bta-miR-2322  | -20.8 | 709 |
| bta-miR-2322  | -20.6 | 412 |
| bta-miR-2322  | -20.0 | 478 |
| bta-miR-2322  | -20.0 | 266 |
| bta-miR-2322  | -18.8 | 438 |
| bta-miR-2322  | -18.1 | 217 |
| bta-miR-2322  | -18.0 | 355 |
| bta-miR-2322  | -17.4 | 69  |
| bta-miR-2322  | -16.4 | 174 |
| bta-miR-2322  | -16.3 | 658 |
| bta-miR-2322  | -15.9 | 26  |
| bta-miR-2322  | -15.9 | 11  |
| bta-miR-2322  | -15.8 | 729 |
| bta-miR-2322  | -14.2 | 113 |
| bta-miR-2322  | -12.8 | 569 |
| bta-miR-2322  | -12.1 | 694 |
| bta-miR-2322  | -11.3 | 598 |
| bta-miR-2322  | -10.8 | 538 |
| bta-miR-2322  | -10.1 | 57  |
| bta-miR-2322* | -25.2 | 196 |
| bta-miR-2322* | -24.8 | 225 |
| bta-miR-2322* | -24.2 | 69  |
| bta-miR-2322* | -23.6 | 445 |
| bta-miR-2322* | -20.5 | 414 |
| bta-miR-2322* | -20.1 | 348 |
| bta-miR-2322* | -19.4 | 557 |
| bta-miR-2322* | -19.1 | 153 |
| bta-miR-2322* | -17.8 | 280 |
| bta-miR-2322* | -17.7 | 38  |
| bta-miR-2322* | -17.6 | 620 |
| bta-miR-2322* | -17.5 | 114 |
| bta-miR-2322* | -16.9 | 178 |
| bta-miR-2322* | -16.5 | 479 |
| bta-miR-2322* | -16.0 | 507 |



|               |       |     |
|---------------|-------|-----|
| bta-miR-2322* | -16.0 | 11  |
| bta-miR-2322* | -16.0 | 389 |
| bta-miR-2322* | -15.1 | 464 |
| bta-miR-2322* | -14.4 | 575 |
| bta-miR-2322* | -14.0 | 253 |
| bta-miR-2322* | -13.6 | 698 |
| bta-miR-2322* | -12.6 | 143 |
| bta-miR-2322* | -12.5 | 97  |
| bta-miR-2322* | -12.3 | 735 |
| bta-miR-2322* | -12.2 | 663 |
| bta-miR-2322* | -12.0 | 313 |
| bta-miR-2322* | -11.5 | 586 |
| bta-miR-2322* | -11.3 | 27  |
| bta-miR-2322* | -11.3 | 435 |
| bta-miR-2322* | -11.1 | 527 |
| bta-miR-2322* | -10.8 | 600 |
| bta-miR-2322* | -10.5 | 650 |
| bta-miR-2322* | -10.4 | 372 |
| bta-miR-2323  | -25.3 | 13  |
| bta-miR-2323  | -25.0 | 262 |
| bta-miR-2323  | -20.7 | 645 |
| bta-miR-2323  | -19.6 | 408 |
| bta-miR-2323  | -18.9 | 597 |
| bta-miR-2323  | -17.8 | 477 |
| bta-miR-2323  | -17.7 | 551 |
| bta-miR-2323  | -17.3 | 200 |
| bta-miR-2323  | -17.0 | 450 |
| bta-miR-2323  | -16.0 | 617 |
| bta-miR-2323  | -15.9 | 67  |
| bta-miR-2323  | -14.3 | 376 |
| bta-miR-2323  | -13.2 | 165 |
| bta-miR-2323  | -13.0 | 344 |
| bta-miR-2323  | -12.4 | 235 |
| bta-miR-2323  | -12.2 | 107 |
| bta-miR-2323  | -11.9 | 520 |
| bta-miR-2323  | -11.4 | 49  |
| bta-miR-2323  | -11.2 | 358 |
| bta-miR-2323  | -11.0 | 579 |
| bta-miR-2323  | -10.7 | 738 |
| bta-miR-2323  | -10.4 | 432 |
| bta-miR-2324  | -37.3 | 125 |
| bta-miR-2324  | -29.9 | 80  |
| bta-miR-2324  | -29.9 | 308 |
| bta-miR-2324  | -29.7 | 349 |
| bta-miR-2324  | -28.8 | 414 |
| bta-miR-2324  | -27.9 | 155 |
| bta-miR-2324  | -27.8 | 456 |
| bta-miR-2324  | -27.2 | 234 |
| bta-miR-2324  | -26.7 | 10  |
| bta-miR-2324  | -24.8 | 376 |
| bta-miR-2324  | -24.2 | 559 |
| bta-miR-2324  | -23.9 | 50  |
| bta-miR-2324  | -21.9 | 482 |
| bta-miR-2324  | -20.3 | 183 |
| bta-miR-2324  | -18.9 | 602 |
| bta-miR-2324  | -18.5 | 653 |
| bta-miR-2324  | -18.0 | 265 |
| bta-miR-2324  | -17.8 | 511 |
| bta-miR-2324  | -16.4 | 114 |

|               |       |     |
|---------------|-------|-----|
| bta-miR-2324  | -16.2 | 582 |
| bta-miR-2324  | -15.6 | 698 |
| bta-miR-2324  | -14.3 | 401 |
| bta-miR-2324  | -14.3 | 737 |
| bta-miR-2324  | -14.1 | 532 |
| bta-miR-2324  | -12.4 | 1   |
| bta-miR-2324  | -11.5 | 37  |
| bta-miR-2324  | -11.0 | 147 |
| bta-miR-2324  | -10.6 | 170 |
| bta-miR-2324  | -10.2 | 682 |
| bta-miR-2324  | -10.1 | 67  |
| bta-miR-2324  | -10.1 | 337 |
| bta-miR-2325a | -18.3 | 348 |
| bta-miR-2325a | -16.6 | 451 |
| bta-miR-2325a | -16.5 | 102 |
| bta-miR-2325a | -16.4 | 479 |
| bta-miR-2325a | -16.3 | 166 |
| bta-miR-2325a | -15.4 | 223 |
| bta-miR-2325a | -15.0 | 327 |
| bta-miR-2325a | -14.5 | 405 |
| bta-miR-2325a | -14.1 | 268 |
| bta-miR-2325a | -13.8 | 142 |
| bta-miR-2325a | -13.7 | 506 |
| bta-miR-2325a | -13.4 | 188 |
| bta-miR-2325a | -13.4 | 28  |
| bta-miR-2325a | -12.9 | 47  |
| bta-miR-2325a | -12.3 | 592 |
| bta-miR-2325a | -11.8 | 650 |
| bta-miR-2325a | -11.6 | 429 |
| bta-miR-2325a | -11.4 | 724 |
| bta-miR-2325a | -10.9 | 308 |
| bta-miR-2325a | -10.7 | 620 |
| bta-miR-2325a | -10.3 | 135 |
| bta-miR-2325a | -10.0 | 320 |
| bta-miR-2326  | -28.8 | 437 |
| bta-miR-2326  | -28.5 | 596 |
| bta-miR-2326  | -23.3 | 409 |
| bta-miR-2326  | -21.9 | 67  |
| bta-miR-2326  | -21.8 | 466 |
| bta-miR-2326  | -20.5 | 491 |
| bta-miR-2326  | -18.6 | 236 |
| bta-miR-2326  | -18.3 | 620 |
| bta-miR-2326  | -18.1 | 164 |
| bta-miR-2326  | -16.5 | 209 |
| bta-miR-2326  | -16.1 | 98  |
| bta-miR-2326  | -14.6 | 5   |
| bta-miR-2326  | -13.1 | 513 |
| bta-miR-2326  | -12.6 | 452 |
| bta-miR-2326  | -11.8 | 127 |
| bta-miR-2326  | -11.6 | 345 |
| bta-miR-2326  | -11.6 | 200 |
| bta-miR-2326  | -11.1 | 25  |
| bta-miR-2326  | -11.1 | 400 |
| bta-miR-2326  | -10.6 | 363 |
| bta-miR-2326  | -10.5 | 567 |
| bta-miR-2326  | -10.4 | 316 |
| bta-miR-2326  | -10.2 | 390 |
| bta-miR-2326  | -10.1 | 90  |
| bta-miR-2327  | -33.2 | 408 |

|               |       |     |
|---------------|-------|-----|
| bta-miR-2327  | -32.1 | 8   |
| bta-miR-2327  | -27.6 | 229 |
| bta-miR-2327  | -25.5 | 515 |
| bta-miR-2327  | -24.2 | 654 |
| bta-miR-2327  | -23.6 | 81  |
| bta-miR-2327  | -23.1 | 344 |
| bta-miR-2327  | -22.6 | 381 |
| bta-miR-2327  | -22.6 | 544 |
| bta-miR-2327  | -22.0 | 119 |
| bta-miR-2327  | -21.4 | 277 |
| bta-miR-2327  | -20.7 | 483 |
| bta-miR-2327  | -20.2 | 164 |
| bta-miR-2327  | -20.1 | 454 |
| bta-miR-2327  | -20.1 | 618 |
| bta-miR-2327  | -17.9 | 38  |
| bta-miR-2327  | -17.8 | 581 |
| bta-miR-2327  | -16.0 | 328 |
| bta-miR-2327  | -16.0 | 199 |
| bta-miR-2327  | -15.6 | 257 |
| bta-miR-2327  | -13.8 | 698 |
| bta-miR-2327  | -13.1 | 66  |
| bta-miR-2327  | -12.5 | 730 |
| bta-miR-2327  | -12.4 | 263 |
| bta-miR-2327  | -11.9 | 433 |
| bta-miR-2327  | -11.8 | 603 |
| bta-miR-2328  | -36.9 | 596 |
| bta-miR-2328  | -29.9 | 40  |
| bta-miR-2328  | -29.7 | 462 |
| bta-miR-2328  | -26.4 | 424 |
| bta-miR-2328  | -22.6 | 402 |
| bta-miR-2328  | -21.9 | 155 |
| bta-miR-2328  | -21.8 | 564 |
| bta-miR-2328  | -19.2 | 17  |
| bta-miR-2328  | -18.8 | 257 |
| bta-miR-2328  | -16.7 | 92  |
| bta-miR-2328  | -16.6 | 632 |
| bta-miR-2328  | -16.6 | 495 |
| bta-miR-2328  | -16.1 | 220 |
| bta-miR-2328  | -15.6 | 363 |
| bta-miR-2328  | -14.5 | 740 |
| bta-miR-2328  | -13.8 | 185 |
| bta-miR-2328  | -11.4 | 30  |
| bta-miR-2328  | -11.4 | 342 |
| bta-miR-2328  | -10.7 | 117 |
| bta-miR-2328  | -10.7 | 235 |
| bta-miR-2328  | -10.4 | 275 |
| bta-miR-2328  | -10.1 | 12  |
| bta-miR-2328* | -32.8 | 242 |
| bta-miR-2328* | -30.4 | 395 |
| bta-miR-2328* | -29.5 | 155 |
| bta-miR-2328* | -28.2 | 576 |
| bta-miR-2328* | -27.8 | 134 |
| bta-miR-2328* | -26.3 | 356 |
| bta-miR-2328* | -26.1 | 464 |
| bta-miR-2328* | -25.0 | 85  |
| bta-miR-2328* | -24.9 | 115 |
| bta-miR-2328* | -24.9 | 424 |
| bta-miR-2328* | -24.7 | 321 |
| bta-miR-2328* | -24.5 | 185 |

|                 |       |     |
|-----------------|-------|-----|
| bta-miR-2328*   | -23.3 | 27  |
| bta-miR-2328*   | -23.1 | 204 |
| bta-miR-2328*   | -21.8 | 507 |
| bta-miR-2328*   | -19.2 | 623 |
| bta-miR-2328*   | -18.0 | 709 |
| bta-miR-2328*   | -17.2 | 563 |
| bta-miR-2328*   | -16.4 | 5   |
| bta-miR-2328*   | -16.4 | 488 |
| bta-miR-2328*   | -15.9 | 271 |
| bta-miR-2328*   | -15.3 | 308 |
| bta-miR-2328*   | -14.9 | 669 |
| bta-miR-2328*   | -13.3 | 109 |
| bta-miR-2328*   | -13.1 | 72  |
| bta-miR-2328*   | -12.6 | 741 |
| bta-miR-2328*   | -12.3 | 691 |
| bta-miR-2328*   | -11.8 | 378 |
| bta-miR-2328*   | -11.6 | 284 |
| bta-miR-2328*   | -11.5 | 657 |
| bta-miR-2328*   | -11.4 | 342 |
| bta-miR-2328*   | -11.2 | 610 |
| bta-miR-2328*   | -10.9 | 419 |
| bta-miR-2328*   | -10.5 | 543 |
| bta-miR-2328*   | -10.1 | 236 |
| bta-miR-2328*   | -10.0 | 447 |
| bta-miR-2329-3p | -20.2 | 182 |
| bta-miR-2329-3p | -18.9 | 457 |
| bta-miR-2329-3p | -18.7 | 43  |
| bta-miR-2329-3p | -17.5 | 86  |
| bta-miR-2329-3p | -17.1 | 113 |
| bta-miR-2329-3p | -16.2 | 549 |
| bta-miR-2329-3p | -16.0 | 369 |
| bta-miR-2329-3p | -16.0 | 263 |
| bta-miR-2329-3p | -15.7 | 7   |
| bta-miR-2329-3p | -15.4 | 420 |
| bta-miR-2329-3p | -15.1 | 205 |
| bta-miR-2329-3p | -15.1 | 490 |
| bta-miR-2329-3p | -14.7 | 138 |
| bta-miR-2329-3p | -14.3 | 619 |
| bta-miR-2329-3p | -14.2 | 597 |
| bta-miR-2329-3p | -14.1 | 165 |
| bta-miR-2329-3p | -13.9 | 282 |
| bta-miR-2329-3p | -13.0 | 342 |
| bta-miR-2329-3p | -12.8 | 228 |
| bta-miR-2329-3p | -12.7 | 642 |
| bta-miR-2329-3p | -12.2 | 692 |
| bta-miR-2329-3p | -12.1 | 577 |
| bta-miR-2329-3p | -11.9 | 393 |
| bta-miR-2329-3p | -11.8 | 25  |
| bta-miR-2329-3p | -11.1 | 737 |
| bta-miR-2329-3p | -10.7 | 249 |
| bta-miR-2329-3p | -10.4 | 72  |
| bta-miR-2329-3p | -10.4 | 407 |
| bta-miR-2329-3p | -10.2 | 107 |
| bta-miR-2329-3p | -10.1 | 156 |
| bta-miR-2329-3p | -10.1 | 520 |
| bta-miR-2329-5p | -23.7 | 19  |
| bta-miR-2329-5p | -21.2 | 60  |
| bta-miR-2329-5p | -20.8 | 412 |
| bta-miR-2329-5p | -19.3 | 567 |

|                 |       |     |
|-----------------|-------|-----|
| bta-miR-2329-5p | -18.8 | 87  |
| bta-miR-2329-5p | -18.6 | 617 |
| bta-miR-2329-5p | -18.0 | 537 |
| bta-miR-2329-5p | -15.6 | 5   |
| bta-miR-2329-5p | -15.1 | 229 |
| bta-miR-2329-5p | -14.9 | 263 |
| bta-miR-2329-5p | -14.9 | 359 |
| bta-miR-2329-5p | -14.7 | 448 |
| bta-miR-2329-5p | -13.3 | 178 |
| bta-miR-2329-5p | -13.3 | 217 |
| bta-miR-2329-5p | -13.2 | 476 |
| bta-miR-2329-5p | -12.5 | 518 |
| bta-miR-2329-5p | -12.4 | 40  |
| bta-miR-2329-5p | -12.2 | 660 |
| bta-miR-2329-5p | -11.7 | 204 |
| bta-miR-2329-5p | -11.7 | 386 |
| bta-miR-2329-5p | -10.9 | 598 |
| bta-miR-2329-5p | -10.7 | 730 |
| bta-miR-2329-5p | -10.7 | 497 |
| bta-miR-2329-5p | -10.6 | 242 |
| bta-miR-2329-5p | -10.6 | 559 |
| bta-miR-2329-5p | -10.4 | 633 |
| bta-miR-2330    | -34.8 | 107 |
| bta-miR-2330    | -29.6 | 462 |
| bta-miR-2330    | -27.5 | 67  |
| bta-miR-2330    | -27.3 | 136 |
| bta-miR-2330    | -27.3 | 409 |
| bta-miR-2330    | -26.1 | 234 |
| bta-miR-2330    | -25.4 | 515 |
| bta-miR-2330    | -25.0 | 9   |
| bta-miR-2330    | -24.6 | 572 |
| bta-miR-2330    | -22.4 | 309 |
| bta-miR-2330    | -21.9 | 191 |
| bta-miR-2330    | -20.5 | 342 |
| bta-miR-2330    | -20.4 | 376 |
| bta-miR-2330    | -20.4 | 545 |
| bta-miR-2330    | -20.2 | 261 |
| bta-miR-2330    | -19.7 | 34  |
| bta-miR-2330    | -19.5 | 639 |
| bta-miR-2330    | -16.8 | 607 |
| bta-miR-2330    | -15.5 | 681 |
| bta-miR-2330    | -15.2 | 655 |
| bta-miR-2330    | -13.6 | 286 |
| bta-miR-2330    | -13.0 | 398 |
| bta-miR-2330    | -12.8 | 739 |
| bta-miR-2330    | -12.0 | 55  |
| bta-miR-2330    | -11.8 | 211 |
| bta-miR-2330    | -11.8 | 495 |
| bta-miR-2330    | -11.5 | 1   |
| bta-miR-2330    | -11.5 | 485 |
| bta-miR-2330    | -11.1 | 455 |
| bta-miR-2330    | -10.7 | 432 |
| bta-miR-2330    | -10.3 | 703 |
| bta-miR-2330*   | -29.6 | 605 |
| bta-miR-2330*   | -25.3 | 424 |
| bta-miR-2330*   | -21.2 | 12  |
| bta-miR-2330*   | -20.9 | 66  |
| bta-miR-2330*   | -19.3 | 263 |
| bta-miR-2330*   | -19.0 | 624 |

|               |       |     |
|---------------|-------|-----|
| bta-miR-2330* | -18.8 | 405 |
| bta-miR-2330* | -18.8 | 479 |
| bta-miR-2330* | -17.3 | 106 |
| bta-miR-2330* | -16.0 | 167 |
| bta-miR-2330* | -15.8 | 206 |
| bta-miR-2330* | -14.5 | 576 |
| bta-miR-2330* | -14.4 | 229 |
| bta-miR-2330* | -13.6 | 94  |
| bta-miR-2330* | -13.3 | 126 |
| bta-miR-2330* | -12.6 | 155 |
| bta-miR-2330* | -12.5 | 359 |
| bta-miR-2330* | -12.0 | 116 |
| bta-miR-2330* | -11.7 | 560 |
| bta-miR-2330* | -11.5 | 30  |
| bta-miR-2330* | -11.4 | 85  |
| bta-miR-2330* | -11.0 | 661 |
| bta-miR-2330* | -10.6 | 738 |
| bta-miR-2330* | -10.5 | 51  |
| bta-miR-2330* | -10.5 | 698 |
| bta-miR-2330* | -10.3 | 457 |
| bta-miR-2331  | -33.2 | 1   |
| bta-miR-2331  | -27.6 | 407 |
| bta-miR-2331  | -27.3 | 604 |
| bta-miR-2331  | -27.1 | 57  |
| bta-miR-2331  | -27.0 | 488 |
| bta-miR-2331  | -22.9 | 454 |
| bta-miR-2331  | -22.1 | 94  |
| bta-miR-2331  | -20.9 | 203 |
| bta-miR-2331  | -20.8 | 371 |
| bta-miR-2331  | -20.4 | 563 |
| bta-miR-2331  | -19.8 | 635 |
| bta-miR-2331  | -19.4 | 263 |
| bta-miR-2331  | -18.6 | 149 |
| bta-miR-2331  | -18.6 | 343 |
| bta-miR-2331  | -18.2 | 39  |
| bta-miR-2331  | -16.4 | 172 |
| bta-miR-2331  | -14.3 | 695 |
| bta-miR-2331  | -13.5 | 291 |
| bta-miR-2331  | -13.4 | 737 |
| bta-miR-2331  | -13.3 | 121 |
| bta-miR-2331  | -13.0 | 434 |
| bta-miR-2331  | -12.5 | 81  |
| bta-miR-2331  | -12.2 | 548 |
| bta-miR-2331  | -10.8 | 188 |
| bta-miR-2331  | -10.7 | 592 |
| bta-miR-2331  | -10.4 | 519 |
| bta-miR-2331  | -10.0 | 129 |
| bta-miR-2331* | -25.4 | 472 |
| bta-miR-2331* | -24.0 | 393 |
| bta-miR-2331* | -22.6 | 58  |
| bta-miR-2331* | -22.1 | 72  |
| bta-miR-2331* | -22.0 | 586 |
| bta-miR-2331* | -20.8 | 617 |
| bta-miR-2331* | -19.6 | 108 |
| bta-miR-2331* | -18.4 | 5   |
| bta-miR-2331* | -17.7 | 282 |
| bta-miR-2331* | -17.5 | 155 |
| bta-miR-2331* | -16.8 | 653 |
| bta-miR-2331* | -16.4 | 425 |

|               |       |     |
|---------------|-------|-----|
| bta-miR-2331* | -16.1 | 741 |
| bta-miR-2331* | -15.3 | 551 |
| bta-miR-2331* | -15.1 | 243 |
| bta-miR-2331* | -15.0 | 205 |
| bta-miR-2331* | -14.7 | 183 |
| bta-miR-2331* | -13.7 | 29  |
| bta-miR-2331* | -13.7 | 691 |
| bta-miR-2331* | -13.4 | 456 |
| bta-miR-2331* | -13.2 | 517 |
| bta-miR-2331* | -13.2 | 637 |
| bta-miR-2331* | -13.0 | 358 |
| bta-miR-2331* | -11.0 | 679 |
| bta-miR-2331* | -10.7 | 703 |
| bta-miR-2331* | -10.0 | 502 |
| bta-miR-2332  | -25.7 | 577 |
| bta-miR-2332  | -24.1 | 395 |
| bta-miR-2332  | -22.6 | 2   |
| bta-miR-2332  | -22.3 | 466 |
| bta-miR-2332  | -20.0 | 88  |
| bta-miR-2332  | -19.8 | 491 |
| bta-miR-2332  | -18.5 | 549 |
| bta-miR-2332  | -18.5 | 359 |
| bta-miR-2332  | -17.5 | 257 |
| bta-miR-2332  | -16.9 | 513 |
| bta-miR-2332  | -16.8 | 291 |
| bta-miR-2332  | -16.8 | 412 |
| bta-miR-2332  | -16.3 | 139 |
| bta-miR-2332  | -16.0 | 642 |
| bta-miR-2332  | -15.9 | 233 |
| bta-miR-2332  | -15.6 | 615 |
| bta-miR-2332  | -15.5 | 170 |
| bta-miR-2332  | -15.2 | 43  |
| bta-miR-2332  | -15.1 | 331 |
| bta-miR-2332  | -14.6 | 344 |
| bta-miR-2332  | -14.6 | 566 |
| bta-miR-2332  | -14.4 | 736 |
| bta-miR-2332  | -14.0 | 707 |
| bta-miR-2332  | -13.9 | 436 |
| bta-miR-2332  | -13.8 | 70  |
| bta-miR-2332  | -13.6 | 677 |
| bta-miR-2332  | -12.9 | 214 |
| bta-miR-2332  | -11.4 | 374 |
| bta-miR-2332  | -10.6 | 537 |
| bta-miR-2332  | -10.5 | 34  |
| bta-miR-2332  | -10.2 | 202 |
| bta-miR-2332  | -10.2 | 132 |
| bta-miR-2333  | -30.2 | 622 |
| bta-miR-2333  | -27.4 | 473 |
| bta-miR-2333  | -26.5 | 109 |
| bta-miR-2333  | -25.0 | 71  |
| bta-miR-2333  | -23.4 | 12  |
| bta-miR-2333  | -23.1 | 414 |
| bta-miR-2333  | -22.8 | 368 |
| bta-miR-2333  | -21.6 | 269 |
| bta-miR-2333  | -19.3 | 499 |
| bta-miR-2333  | -17.9 | 563 |
| bta-miR-2333  | -17.8 | 51  |
| bta-miR-2333  | -17.7 | 220 |
| bta-miR-2333  | -17.6 | 167 |

|              |       |     |
|--------------|-------|-----|
| bta-miR-2333 | -16.3 | 33  |
| bta-miR-2333 | -16.3 | 596 |
| bta-miR-2333 | -16.2 | 539 |
| bta-miR-2333 | -15.5 | 450 |
| bta-miR-2333 | -15.3 | 361 |
| bta-miR-2333 | -14.2 | 663 |
| bta-miR-2333 | -13.8 | 389 |
| bta-miR-2333 | -13.4 | 740 |
| bta-miR-2333 | -13.0 | 401 |
| bta-miR-2333 | -12.8 | 4   |
| bta-miR-2333 | -11.9 | 615 |
| bta-miR-2333 | -10.9 | 155 |
| bta-miR-2333 | -10.7 | 707 |
| bta-miR-2333 | -10.5 | 330 |
| bta-miR-2333 | -10.5 | 209 |
| bta-miR-2333 | -10.0 | 97  |
| bta-miR-2333 | -10.0 | 308 |
| bta-miR-2334 | -26.9 | 616 |
| bta-miR-2334 | -22.0 | 404 |
| bta-miR-2334 | -22.0 | 16  |
| bta-miR-2334 | -21.7 | 69  |
| bta-miR-2334 | -21.7 | 499 |
| bta-miR-2334 | -21.4 | 266 |
| bta-miR-2334 | -21.4 | 435 |
| bta-miR-2334 | -21.3 | 102 |
| bta-miR-2334 | -20.4 | 730 |
| bta-miR-2334 | -20.2 | 598 |
| bta-miR-2334 | -19.6 | 202 |
| bta-miR-2334 | -18.9 | 478 |
| bta-miR-2334 | -18.3 | 347 |
| bta-miR-2334 | -17.5 | 176 |
| bta-miR-2334 | -17.3 | 377 |
| bta-miR-2334 | -17.0 | 566 |
| bta-miR-2334 | -15.5 | 240 |
| bta-miR-2334 | -15.2 | 149 |
| bta-miR-2334 | -14.3 | 423 |
| bta-miR-2334 | -14.0 | 653 |
| bta-miR-2334 | -13.4 | 544 |
| bta-miR-2334 | -12.0 | 159 |
| bta-miR-2334 | -11.8 | 10  |
| bta-miR-2334 | -11.3 | 56  |
| bta-miR-2334 | -10.6 | 121 |
| bta-miR-2334 | -10.2 | 293 |
| bta-miR-2335 | -16.8 | 37  |
| bta-miR-2335 | -14.8 | 263 |
| bta-miR-2335 | -14.8 | 200 |
| bta-miR-2335 | -13.4 | 516 |
| bta-miR-2335 | -13.4 | 9   |
| bta-miR-2335 | -13.3 | 386 |
| bta-miR-2335 | -12.6 | 476 |
| bta-miR-2335 | -12.2 | 638 |
| bta-miR-2335 | -11.6 | 238 |
| bta-miR-2335 | -11.3 | 545 |
| bta-miR-2335 | -10.9 | 290 |
| bta-miR-2335 | -10.4 | 80  |
| bta-miR-2335 | -10.0 | 1   |
| bta-miR-2335 | -10.0 | 449 |
| bta-miR-2335 | -10.0 | 613 |
| bta-miR-2336 | -17.5 | 487 |



|              |       |     |
|--------------|-------|-----|
| bta-miR-2336 | -17.4 | 70  |
| bta-miR-2336 | -16.6 | 205 |
| bta-miR-2336 | -16.0 | 632 |
| bta-miR-2336 | -15.8 | 424 |
| bta-miR-2336 | -14.4 | 548 |
| bta-miR-2336 | -14.4 | 605 |
| bta-miR-2336 | -14.3 | 56  |
| bta-miR-2336 | -13.9 | 517 |
| bta-miR-2336 | -13.7 | 166 |
| bta-miR-2336 | -13.4 | 22  |
| bta-miR-2336 | -13.1 | 394 |
| bta-miR-2336 | -12.7 | 381 |
| bta-miR-2336 | -12.6 | 734 |
| bta-miR-2336 | -12.1 | 270 |
| bta-miR-2336 | -12.0 | 464 |
| bta-miR-2336 | -11.6 | 584 |
| bta-miR-2336 | -11.2 | 282 |
| bta-miR-2336 | -11.0 | 243 |
| bta-miR-2336 | -10.4 | 108 |
| bta-miR-2336 | -10.4 | 185 |
| bta-miR-2336 | -10.2 | 343 |
| bta-miR-2337 | -22.4 | 443 |
| bta-miR-2337 | -19.9 | 610 |
| bta-miR-2337 | -16.9 | 499 |
| bta-miR-2337 | -16.3 | 226 |
| bta-miR-2337 | -15.9 | 470 |
| bta-miR-2337 | -15.6 | 174 |
| bta-miR-2337 | -15.3 | 113 |
| bta-miR-2337 | -15.0 | 338 |
| bta-miR-2337 | -14.0 | 405 |
| bta-miR-2337 | -13.9 | 371 |
| bta-miR-2337 | -13.6 | 725 |
| bta-miR-2337 | -13.3 | 36  |
| bta-miR-2337 | -13.0 | 68  |
| bta-miR-2337 | -12.9 | 574 |
| bta-miR-2337 | -12.6 | 11  |
| bta-miR-2337 | -12.5 | 268 |
| bta-miR-2337 | -12.4 | 418 |
| bta-miR-2337 | -11.4 | 201 |
| bta-miR-2337 | -11.3 | 630 |
| bta-miR-2337 | -11.2 | 558 |
| bta-miR-2337 | -11.2 | 313 |
| bta-miR-2337 | -11.1 | 218 |
| bta-miR-2337 | -10.8 | 124 |
| bta-miR-2337 | -10.5 | 355 |
| bta-miR-2337 | -10.3 | 151 |
| bta-miR-2337 | -10.2 | 663 |
| bta-miR-2337 | -10.1 | 129 |
| bta-miR-199c | -21.3 | 515 |
| bta-miR-199c | -21.3 | 409 |
| bta-miR-199c | -18.7 | 376 |
| bta-miR-199c | -18.4 | 34  |
| bta-miR-199c | -18.3 | 572 |
| bta-miR-199c | -18.0 | 618 |
| bta-miR-199c | -17.3 | 7   |
| bta-miR-199c | -16.9 | 92  |
| bta-miR-199c | -16.5 | 263 |
| bta-miR-199c | -16.0 | 199 |
| bta-miR-199c | -16.0 | 655 |

|              |       |     |
|--------------|-------|-----|
| bta-miR-199c | -15.8 | 359 |
| bta-miR-199c | -15.3 | 544 |
| bta-miR-199c | -15.3 | 69  |
| bta-miR-199c | -15.0 | 632 |
| bta-miR-199c | -14.8 | 109 |
| bta-miR-199c | -14.6 | 123 |
| bta-miR-199c | -14.4 | 484 |
| bta-miR-199c | -13.7 | 185 |
| bta-miR-199c | -13.4 | 728 |
| bta-miR-199c | -13.3 | 229 |
| bta-miR-199c | -13.1 | 143 |
| bta-miR-199c | -12.5 | 462 |
| bta-miR-199c | -11.8 | 606 |
| bta-miR-199c | -11.5 | 342 |
| bta-miR-199c | -10.7 | 697 |
| bta-miR-199c | -10.5 | 164 |
| bta-miR-2338 | -33.3 | 24  |
| bta-miR-2338 | -31.7 | 235 |
| bta-miR-2338 | -28.6 | 107 |
| bta-miR-2338 | -27.9 | 388 |
| bta-miR-2338 | -26.2 | 463 |
| bta-miR-2338 | -25.8 | 415 |
| bta-miR-2338 | -25.4 | 565 |
| bta-miR-2338 | -25.2 | 165 |
| bta-miR-2338 | -22.5 | 69  |
| bta-miR-2338 | -22.2 | 353 |
| bta-miR-2338 | -20.8 | 619 |
| bta-miR-2338 | -20.4 | 493 |
| bta-miR-2338 | -20.3 | 202 |
| bta-miR-2338 | -19.2 | 3   |
| bta-miR-2338 | -18.8 | 543 |
| bta-miR-2338 | -18.7 | 128 |
| bta-miR-2338 | -18.6 | 282 |
| bta-miR-2338 | -17.0 | 653 |
| bta-miR-2338 | -16.2 | 319 |
| bta-miR-2338 | -16.1 | 55  |
| bta-miR-2338 | -15.0 | 678 |
| bta-miR-2338 | -12.4 | 191 |
| bta-miR-2338 | -12.2 | 737 |
| bta-miR-2338 | -11.6 | 596 |
| bta-miR-2338 | -11.5 | 708 |
| bta-miR-2338 | -11.2 | 524 |
| bta-miR-2338 | -10.7 | 276 |
| bta-miR-2339 | -24.3 | 414 |
| bta-miR-2339 | -23.8 | 487 |
| bta-miR-2339 | -21.9 | 9   |
| bta-miR-2339 | -21.2 | 85  |
| bta-miR-2339 | -20.8 | 559 |
| bta-miR-2339 | -20.7 | 205 |
| bta-miR-2339 | -19.7 | 623 |
| bta-miR-2339 | -19.3 | 243 |
| bta-miR-2339 | -18.1 | 108 |
| bta-miR-2339 | -17.8 | 166 |
| bta-miR-2339 | -17.7 | 457 |
| bta-miR-2339 | -17.4 | 472 |
| bta-miR-2339 | -17.3 | 605 |
| bta-miR-2339 | -17.1 | 381 |
| bta-miR-2339 | -16.9 | 50  |
| bta-miR-2339 | -16.8 | 520 |

|               |       |     |
|---------------|-------|-----|
| bta-miR-2339  | -16.1 | 653 |
| bta-miR-2339  | -14.4 | 361 |
| bta-miR-2339  | -14.4 | 29  |
| bta-miR-2339  | -14.3 | 694 |
| bta-miR-2339  | -13.7 | 539 |
| bta-miR-2339  | -13.0 | 586 |
| bta-miR-2339  | -12.6 | 282 |
| bta-miR-2339  | -11.7 | 403 |
| bta-miR-2339  | -11.6 | 742 |
| bta-miR-2339  | -11.3 | 308 |
| bta-miR-2339  | -11.1 | 435 |
| bta-miR-2339  | -10.5 | 641 |
| bta-miR-2339  | -10.0 | 154 |
| bta-miR-1814a | -21.9 | 227 |
| bta-miR-1814a | -19.3 | 469 |
| bta-miR-1814a | -18.2 | 333 |
| bta-miR-1814a | -17.4 | 557 |
| bta-miR-1814a | -16.5 | 405 |
| bta-miR-1814a | -15.8 | 103 |
| bta-miR-1814a | -15.8 | 494 |
| bta-miR-1814a | -15.2 | 268 |
| bta-miR-1814a | -14.8 | 188 |
| bta-miR-1814a | -14.4 | 441 |
| bta-miR-1814a | -14.4 | 122 |
| bta-miR-1814a | -14.2 | 355 |
| bta-miR-1814a | -14.2 | 151 |
| bta-miR-1814a | -13.9 | 589 |
| bta-miR-1814a | -13.8 | 22  |
| bta-miR-1814a | -12.6 | 726 |
| bta-miR-1814a | -12.4 | 301 |
| bta-miR-1814a | -12.0 | 371 |
| bta-miR-1814a | -11.6 | 616 |
| bta-miR-1814a | -11.6 | 65  |
| bta-miR-1814a | -11.6 | 652 |
| bta-miR-1814a | -11.5 | 171 |
| bta-miR-1814a | -10.4 | 573 |
| bta-miR-2340  | -25.4 | 67  |
| bta-miR-2340  | -25.1 | 150 |
| bta-miR-2340  | -25.0 | 597 |
| bta-miR-2340  | -24.9 | 420 |
| bta-miR-2340  | -24.0 | 477 |
| bta-miR-2340  | -23.5 | 199 |
| bta-miR-2340  | -21.0 | 106 |
| bta-miR-2340  | -20.4 | 373 |
| bta-miR-2340  | -18.7 | 621 |
| bta-miR-2340  | -18.0 | 240 |
| bta-miR-2340  | -18.0 | 22  |
| bta-miR-2340  | -17.6 | 558 |
| bta-miR-2340  | -16.7 | 264 |
| bta-miR-2340  | -16.4 | 354 |
| bta-miR-2340  | -16.2 | 300 |
| bta-miR-2340  | -15.0 | 405 |
| bta-miR-2340  | -14.6 | 49  |
| bta-miR-2340  | -14.6 | 94  |
| bta-miR-2340  | -14.3 | 698 |
| bta-miR-2340  | -14.2 | 4   |
| bta-miR-2340  | -14.0 | 319 |
| bta-miR-2340  | -13.4 | 736 |
| bta-miR-2340  | -13.0 | 129 |

|              |       |     |
|--------------|-------|-----|
| bta-miR-2340 | -12.7 | 651 |
| bta-miR-2340 | -11.7 | 614 |
| bta-miR-2340 | -11.2 | 185 |
| bta-miR-2340 | -10.5 | 520 |
| bta-miR-2341 | -22.5 | 107 |
| bta-miR-2341 | -21.5 | 561 |
| bta-miR-2341 | -21.0 | 393 |
| bta-miR-2341 | -19.4 | 277 |
| bta-miR-2341 | -19.4 | 456 |
| bta-miR-2341 | -18.2 | 511 |
| bta-miR-2341 | -17.6 | 419 |
| bta-miR-2341 | -17.0 | 72  |
| bta-miR-2341 | -16.5 | 632 |
| bta-miR-2341 | -16.3 | 165 |
| bta-miR-2341 | -15.7 | 669 |
| bta-miR-2341 | -15.5 | 50  |
| bta-miR-2341 | -15.4 | 308 |
| bta-miR-2341 | -14.9 | 361 |
| bta-miR-2341 | -14.5 | 9   |
| bta-miR-2341 | -14.4 | 125 |
| bta-miR-2341 | -14.3 | 243 |
| bta-miR-2341 | -13.9 | 482 |
| bta-miR-2341 | -13.8 | 716 |
| bta-miR-2341 | -13.2 | 198 |
| bta-miR-2341 | -12.2 | 539 |
| bta-miR-2341 | -10.9 | 29  |
| bta-miR-2341 | -10.7 | 495 |
| bta-miR-2341 | -10.3 | 263 |
| bta-miR-2341 | -10.2 | 623 |
| bta-miR-2341 | -10.1 | 742 |
| bta-miR-2342 | -26.9 | 51  |
| bta-miR-2342 | -25.1 | 479 |
| bta-miR-2342 | -24.0 | 175 |
| bta-miR-2342 | -22.3 | 204 |
| bta-miR-2342 | -21.7 | 584 |
| bta-miR-2342 | -20.0 | 557 |
| bta-miR-2342 | -19.1 | 357 |
| bta-miR-2342 | -18.7 | 408 |
| bta-miR-2342 | -18.4 | 241 |
| bta-miR-2342 | -18.0 | 668 |
| bta-miR-2342 | -17.9 | 620 |
| bta-miR-2342 | -17.7 | 114 |
| bta-miR-2342 | -17.5 | 153 |
| bta-miR-2342 | -17.5 | 697 |
| bta-miR-2342 | -16.9 | 452 |
| bta-miR-2342 | -16.7 | 71  |
| bta-miR-2342 | -16.4 | 331 |
| bta-miR-2342 | -15.7 | 307 |
| bta-miR-2342 | -15.6 | 517 |
| bta-miR-2342 | -15.3 | 7   |
| bta-miR-2342 | -14.9 | 395 |
| bta-miR-2342 | -14.3 | 41  |
| bta-miR-2342 | -14.1 | 464 |
| bta-miR-2342 | -14.0 | 271 |
| bta-miR-2342 | -13.7 | 86  |
| bta-miR-2342 | -12.9 | 283 |
| bta-miR-2342 | -11.2 | 738 |
| bta-miR-2342 | -10.5 | 30  |
| bta-miR-2342 | -10.2 | 712 |

|              |       |     |
|--------------|-------|-----|
| bta-miR-2342 | -10.0 | 226 |
| bta-miR-2343 | -25.3 | 113 |
| bta-miR-2343 | -24.3 | 555 |
| bta-miR-2343 | -23.7 | 316 |
| bta-miR-2343 | -23.2 | 233 |
| bta-miR-2343 | -22.7 | 464 |
| bta-miR-2343 | -22.3 | 389 |
| bta-miR-2343 | -20.4 | 411 |
| bta-miR-2343 | -19.5 | 151 |
| bta-miR-2343 | -19.1 | 78  |
| bta-miR-2343 | -19.0 | 174 |
| bta-miR-2343 | -18.2 | 663 |
| bta-miR-2343 | -18.0 | 355 |
| bta-miR-2343 | -17.9 | 139 |
| bta-miR-2343 | -17.7 | 15  |
| bta-miR-2343 | -16.8 | 252 |
| bta-miR-2343 | -16.7 | 36  |
| bta-miR-2343 | -16.7 | 202 |
| bta-miR-2343 | -16.4 | 618 |
| bta-miR-2343 | -16.2 | 505 |
| bta-miR-2343 | -15.8 | 281 |
| bta-miR-2343 | -14.7 | 1   |
| bta-miR-2343 | -14.6 | 527 |
| bta-miR-2343 | -14.1 | 341 |
| bta-miR-2343 | -13.5 | 687 |
| bta-miR-2343 | -11.8 | 594 |
| bta-miR-2343 | -10.9 | 452 |
| bta-miR-2343 | -10.6 | 739 |
| bta-miR-2343 | -10.5 | 375 |
| bta-miR-2343 | -10.5 | 651 |
| bta-miR-2343 | -10.2 | 266 |
| bta-miR-2344 | -23.9 | 36  |
| bta-miR-2344 | -23.2 | 559 |
| bta-miR-2344 | -22.6 | 274 |
| bta-miR-2344 | -21.9 | 635 |
| bta-miR-2344 | -21.8 | 4   |
| bta-miR-2344 | -21.0 | 475 |
| bta-miR-2344 | -20.6 | 125 |
| bta-miR-2344 | -19.9 | 504 |
| bta-miR-2344 | -19.3 | 419 |
| bta-miR-2344 | -18.1 | 397 |
| bta-miR-2344 | -18.0 | 108 |
| bta-miR-2344 | -17.6 | 352 |
| bta-miR-2344 | -16.9 | 238 |
| bta-miR-2344 | -16.8 | 451 |
| bta-miR-2344 | -16.2 | 689 |
| bta-miR-2344 | -15.6 | 188 |
| bta-miR-2344 | -15.3 | 663 |
| bta-miR-2344 | -15.1 | 72  |
| bta-miR-2344 | -15.0 | 738 |
| bta-miR-2344 | -13.4 | 310 |
| bta-miR-2344 | -13.0 | 587 |
| bta-miR-2344 | -12.8 | 530 |
| bta-miR-2344 | -12.7 | 164 |
| bta-miR-2344 | -12.5 | 258 |
| bta-miR-2344 | -11.8 | 382 |
| bta-miR-2344 | -11.0 | 211 |
| bta-miR-2344 | -11.0 | 328 |
| bta-miR-2344 | -10.9 | 23  |

|              |       |     |
|--------------|-------|-----|
| bta-miR-2344 | -10.6 | 342 |
| bta-miR-2344 | -10.5 | 710 |
| bta-miR-2345 | -17.1 | 151 |
| bta-miR-2345 | -16.6 | 598 |
| bta-miR-2345 | -16.1 | 94  |
| bta-miR-2345 | -14.9 | 352 |
| bta-miR-2345 | -14.2 | 196 |
| bta-miR-2345 | -13.6 | 225 |
| bta-miR-2345 | -13.6 | 406 |
| bta-miR-2345 | -13.4 | 265 |
| bta-miR-2345 | -13.3 | 176 |
| bta-miR-2345 | -13.3 | 375 |
| bta-miR-2345 | -13.3 | 478 |
| bta-miR-2345 | -12.6 | 439 |
| bta-miR-2345 | -12.0 | 727 |
| bta-miR-2345 | -11.5 | 615 |
| bta-miR-2345 | -11.3 | 574 |
| bta-miR-2345 | -10.8 | 499 |
| bta-miR-2345 | -10.6 | 119 |
| bta-miR-2345 | -10.5 | 65  |
| bta-miR-2345 | -10.0 | 41  |
| bta-miR-2346 | -26.0 | 126 |
| bta-miR-2346 | -21.9 | 44  |
| bta-miR-2346 | -21.2 | 237 |
| bta-miR-2346 | -21.0 | 361 |
| bta-miR-2346 | -20.3 | 473 |
| bta-miR-2346 | -19.5 | 420 |
| bta-miR-2346 | -19.5 | 563 |
| bta-miR-2346 | -18.6 | 156 |
| bta-miR-2346 | -18.4 | 308 |
| bta-miR-2346 | -18.2 | 8   |
| bta-miR-2346 | -17.9 | 199 |
| bta-miR-2346 | -17.1 | 81  |
| bta-miR-2346 | -17.1 | 109 |
| bta-miR-2346 | -16.1 | 337 |
| bta-miR-2346 | -15.8 | 270 |
| bta-miR-2346 | -15.6 | 499 |
| bta-miR-2346 | -15.2 | 395 |
| bta-miR-2346 | -14.3 | 455 |
| bta-miR-2346 | -13.8 | 28  |
| bta-miR-2346 | -13.3 | 669 |
| bta-miR-2346 | -12.8 | 624 |
| bta-miR-2346 | -12.3 | 698 |
| bta-miR-2346 | -12.3 | 185 |
| bta-miR-2346 | -11.9 | 67  |
| bta-miR-2346 | -11.5 | 520 |
| bta-miR-2346 | -10.1 | 602 |
| bta-miR-2346 | -10.0 | 737 |
| bta-miR-2347 | -22.1 | 465 |
| bta-miR-2347 | -21.2 | 181 |
| bta-miR-2347 | -21.0 | 107 |
| bta-miR-2347 | -20.7 | 50  |
| bta-miR-2347 | -20.5 | 664 |
| bta-miR-2347 | -19.9 | 243 |
| bta-miR-2347 | -19.8 | 567 |
| bta-miR-2347 | -19.4 | 623 |
| bta-miR-2347 | -19.4 | 542 |
| bta-miR-2347 | -19.3 | 422 |
| bta-miR-2347 | -18.4 | 389 |

|              |       |     |
|--------------|-------|-----|
| bta-miR-2347 | -17.6 | 81  |
| bta-miR-2347 | -17.3 | 205 |
| bta-miR-2347 | -17.2 | 499 |
| bta-miR-2347 | -17.1 | 9   |
| bta-miR-2347 | -15.0 | 282 |
| bta-miR-2347 | -14.9 | 523 |
| bta-miR-2347 | -14.3 | 361 |
| bta-miR-2347 | -14.0 | 125 |
| bta-miR-2347 | -13.3 | 165 |
| bta-miR-2347 | -13.1 | 707 |
| bta-miR-2347 | -12.6 | 27  |
| bta-miR-2347 | -12.0 | 65  |
| bta-miR-2347 | -11.6 | 653 |
| bta-miR-2347 | -11.5 | 737 |
| bta-miR-2347 | -10.7 | 170 |
| bta-miR-2347 | -10.5 | 456 |
| bta-miR-2347 | -10.1 | 228 |
| bta-miR-2347 | -10.1 | 596 |
| bta-miR-2348 | -28.6 | 115 |
| bta-miR-2348 | -28.0 | 414 |
| bta-miR-2348 | -27.2 | 308 |
| bta-miR-2348 | -26.5 | 85  |
| bta-miR-2348 | -25.2 | 560 |
| bta-miR-2348 | -23.9 | 387 |
| bta-miR-2348 | -23.8 | 185 |
| bta-miR-2348 | -23.6 | 155 |
| bta-miR-2348 | -22.1 | 457 |
| bta-miR-2348 | -21.8 | 12  |
| bta-miR-2348 | -21.4 | 342 |
| bta-miR-2348 | -19.7 | 482 |
| bta-miR-2348 | -19.5 | 232 |
| bta-miR-2348 | -18.6 | 38  |
| bta-miR-2348 | -17.8 | 620 |
| bta-miR-2348 | -17.1 | 586 |
| bta-miR-2348 | -16.5 | 696 |
| bta-miR-2348 | -16.3 | 137 |
| bta-miR-2348 | -16.3 | 258 |
| bta-miR-2348 | -15.3 | 661 |
| bta-miR-2348 | -14.5 | 283 |
| bta-miR-2348 | -14.4 | 742 |
| bta-miR-2348 | -13.1 | 106 |
| bta-miR-2348 | -13.1 | 61  |
| bta-miR-2348 | -11.8 | 519 |
| bta-miR-2348 | -10.8 | 548 |
| bta-miR-2348 | -10.6 | 643 |
| bta-miR-2348 | -10.5 | 377 |
| bta-miR-2348 | -10.2 | 148 |
| bta-miR-2349 | -28.6 | 344 |
| bta-miR-2349 | -27.2 | 1   |
| bta-miR-2349 | -25.5 | 433 |
| bta-miR-2349 | -25.3 | 82  |
| bta-miR-2349 | -24.1 | 616 |
| bta-miR-2349 | -24.1 | 204 |
| bta-miR-2349 | -22.9 | 566 |
| bta-miR-2349 | -22.8 | 403 |
| bta-miR-2349 | -22.3 | 498 |
| bta-miR-2349 | -21.3 | 25  |
| bta-miR-2349 | -20.4 | 464 |
| bta-miR-2349 | -19.8 | 60  |

|               |       |     |
|---------------|-------|-----|
| bta-miR-2349  | -19.6 | 365 |
| bta-miR-2349  | -18.8 | 588 |
| bta-miR-2349  | -18.2 | 730 |
| bta-miR-2349  | -17.1 | 258 |
| bta-miR-2349  | -16.6 | 659 |
| bta-miR-2349  | -15.7 | 126 |
| bta-miR-2349  | -14.1 | 166 |
| bta-miR-2349  | -13.5 | 291 |
| bta-miR-2349  | -12.9 | 541 |
| bta-miR-2349  | -12.6 | 386 |
| bta-miR-2349  | -12.0 | 150 |
| bta-miR-2349  | -11.3 | 51  |
| bta-miR-2349  | -10.9 | 684 |
| bta-miR-2284p | -19.4 | 258 |
| bta-miR-2284p | -17.8 | 368 |
| bta-miR-2284p | -17.7 | 59  |
| bta-miR-2284p | -16.2 | 626 |
| bta-miR-2284p | -16.0 | 401 |
| bta-miR-2284p | -16.0 | 596 |
| bta-miR-2284p | -15.9 | 232 |
| bta-miR-2284p | -15.8 | 499 |
| bta-miR-2284p | -15.6 | 89  |
| bta-miR-2284p | -14.7 | 111 |
| bta-miR-2284p | -14.2 | 168 |
| bta-miR-2284p | -14.0 | 191 |
| bta-miR-2284p | -13.9 | 580 |
| bta-miR-2284p | -13.6 | 5   |
| bta-miR-2284p | -13.5 | 476 |
| bta-miR-2284p | -13.1 | 711 |
| bta-miR-2284p | -12.9 | 451 |
| bta-miR-2284p | -12.9 | 689 |
| bta-miR-2284p | -12.8 | 330 |
| bta-miR-2284p | -12.5 | 310 |
| bta-miR-2284p | -12.0 | 281 |
| bta-miR-2284p | -12.0 | 421 |
| bta-miR-2284p | -12.0 | 431 |
| bta-miR-2284p | -11.9 | 31  |
| bta-miR-2284p | -11.9 | 567 |
| bta-miR-2284p | -11.1 | 462 |
| bta-miR-2284p | -11.1 | 216 |
| bta-miR-2284p | -11.1 | 663 |
| bta-miR-2284p | -10.6 | 552 |
| bta-miR-2284p | -10.3 | 357 |
| bta-miR-2284p | -10.2 | 163 |
| bta-miR-2284p | -10.0 | 324 |
| bta-miR-2284p | -10.0 | 641 |
| bta-miR-2350  | -34.7 | 216 |
| bta-miR-2350  | -32.2 | 438 |
| bta-miR-2350  | -26.2 | 609 |
| bta-miR-2350  | -25.5 | 267 |
| bta-miR-2350  | -25.5 | 61  |
| bta-miR-2350  | -21.5 | 337 |
| bta-miR-2350  | -21.3 | 174 |
| bta-miR-2350  | -20.6 | 92  |
| bta-miR-2350  | -20.3 | 403 |
| bta-miR-2350  | -20.0 | 587 |
| bta-miR-2350  | -18.7 | 6   |
| bta-miR-2350  | -18.6 | 477 |
| bta-miR-2350  | -16.5 | 497 |



|              |       |     |
|--------------|-------|-----|
| bta-miR-2350 | -15.3 | 629 |
| bta-miR-2350 | -14.1 | 730 |
| bta-miR-2350 | -13.5 | 238 |
| bta-miR-2350 | -12.8 | 364 |
| bta-miR-2350 | -11.2 | 561 |
| bta-miR-2350 | -10.9 | 154 |
| bta-miR-2351 | -16.3 | 403 |
| bta-miR-2351 | -15.4 | 508 |
| bta-miR-2351 | -15.2 | 486 |
| bta-miR-2351 | -14.1 | 351 |
| bta-miR-2351 | -13.7 | 371 |
| bta-miR-2351 | -13.1 | 11  |
| bta-miR-2351 | -12.9 | 620 |
| bta-miR-2351 | -12.5 | 121 |
| bta-miR-2351 | -12.3 | 149 |
| bta-miR-2351 | -11.9 | 172 |
| bta-miR-2351 | -11.8 | 49  |
| bta-miR-2351 | -11.7 | 197 |
| bta-miR-2351 | -11.3 | 268 |
| bta-miR-2351 | -11.0 | 590 |
| bta-miR-2351 | -10.8 | 300 |
| bta-miR-2351 | -10.6 | 432 |
| bta-miR-2351 | -10.5 | 737 |
| bta-miR-2351 | -10.4 | 100 |
| bta-miR-2351 | -10.1 | 69  |
| bta-miR-2352 | -19.9 | 85  |
| bta-miR-2352 | -19.9 | 205 |
| bta-miR-2352 | -19.7 | 495 |
| bta-miR-2352 | -19.5 | 381 |
| bta-miR-2352 | -18.9 | 456 |
| bta-miR-2352 | -17.9 | 243 |
| bta-miR-2352 | -17.6 | 107 |
| bta-miR-2352 | -17.6 | 419 |
| bta-miR-2352 | -17.5 | 50  |
| bta-miR-2352 | -17.5 | 270 |
| bta-miR-2352 | -16.6 | 623 |
| bta-miR-2352 | -16.4 | 576 |
| bta-miR-2352 | -14.8 | 653 |
| bta-miR-2352 | -14.2 | 559 |
| bta-miR-2352 | -14.1 | 527 |
| bta-miR-2352 | -14.0 | 170 |
| bta-miR-2352 | -13.9 | 401 |
| bta-miR-2352 | -13.8 | 358 |
| bta-miR-2352 | -13.4 | 2   |
| bta-miR-2352 | -13.3 | 16  |
| bta-miR-2352 | -13.0 | 669 |
| bta-miR-2352 | -12.8 | 687 |
| bta-miR-2352 | -11.8 | 232 |
| bta-miR-2352 | -11.0 | 71  |
| bta-miR-2352 | -11.0 | 472 |
| bta-miR-2352 | -11.0 | 715 |
| bta-miR-2352 | -10.3 | 605 |
| bta-miR-2353 | -30.4 | 572 |
| bta-miR-2353 | -25.8 | 52  |
| bta-miR-2353 | -24.2 | 462 |
| bta-miR-2353 | -23.9 | 515 |
| bta-miR-2353 | -23.8 | 392 |
| bta-miR-2353 | -23.6 | 87  |
| bta-miR-2353 | -23.2 | 2   |

|               |       |     |
|---------------|-------|-----|
| bta-miR-2353  | -21.5 | 545 |
| bta-miR-2353  | -20.8 | 200 |
| bta-miR-2353  | -20.0 | 237 |
| bta-miR-2353  | -19.7 | 136 |
| bta-miR-2353  | -18.5 | 639 |
| bta-miR-2353  | -18.5 | 607 |
| bta-miR-2353  | -17.8 | 681 |
| bta-miR-2353  | -17.1 | 426 |
| bta-miR-2353  | -16.2 | 164 |
| bta-miR-2353  | -16.0 | 358 |
| bta-miR-2353  | -15.7 | 277 |
| bta-miR-2353  | -15.1 | 715 |
| bta-miR-2353  | -14.7 | 19  |
| bta-miR-2353  | -11.0 | 309 |
| bta-miR-2353  | -10.7 | 191 |
| bta-miR-2353  | -10.4 | 626 |
| bta-miR-2353  | -10.3 | 127 |
| bta-miR-2353  | -10.1 | 386 |
| bta-miR-2353  | -10.1 | 38  |
| bta-miR-2354  | -21.8 | 415 |
| bta-miR-2354  | -19.2 | 369 |
| bta-miR-2354  | -18.3 | 92  |
| bta-miR-2354  | -16.7 | 197 |
| bta-miR-2354  | -16.4 | 351 |
| bta-miR-2354  | -16.0 | 730 |
| bta-miR-2354  | -16.0 | 156 |
| bta-miR-2354  | -15.5 | 457 |
| bta-miR-2354  | -14.8 | 508 |
| bta-miR-2354  | -14.7 | 649 |
| bta-miR-2354  | -14.4 | 13  |
| bta-miR-2354  | -14.4 | 568 |
| bta-miR-2354  | -12.8 | 124 |
| bta-miR-2354  | -12.6 | 269 |
| bta-miR-2354  | -12.4 | 239 |
| bta-miR-2354  | -12.3 | 175 |
| bta-miR-2354  | -12.2 | 483 |
| bta-miR-2354  | -12.2 | 49  |
| bta-miR-2354  | -11.8 | 301 |
| bta-miR-2354  | -11.7 | 313 |
| bta-miR-2354  | -11.5 | 698 |
| bta-miR-2354  | -11.1 | 600 |
| bta-miR-2354  | -10.9 | 68  |
| bta-miR-2354  | -10.6 | 617 |
| bta-miR-2354  | -10.3 | 334 |
| bta-miR-2354  | -10.2 | 559 |
| bta-miR-2355* | -22.3 | 525 |
| bta-miR-2355* | -22.1 | 1   |
| bta-miR-2355* | -20.6 | 96  |
| bta-miR-2355* | -19.3 | 457 |
| bta-miR-2355* | -19.1 | 544 |
| bta-miR-2355* | -18.7 | 404 |
| bta-miR-2355* | -18.5 | 488 |
| bta-miR-2355* | -18.4 | 230 |
| bta-miR-2355* | -18.2 | 22  |
| bta-miR-2355* | -15.7 | 199 |
| bta-miR-2355* | -15.7 | 577 |
| bta-miR-2355* | -15.6 | 643 |
| bta-miR-2355* | -14.5 | 354 |
| bta-miR-2355* | -14.3 | 606 |

|               |       |     |
|---------------|-------|-----|
| bta-miR-2355* | -14.2 | 696 |
| bta-miR-2355* | -13.1 | 381 |
| bta-miR-2355* | -12.8 | 428 |
| bta-miR-2355* | -12.5 | 421 |
| bta-miR-2355* | -12.2 | 164 |
| bta-miR-2355* | -12.2 | 667 |
| bta-miR-2355* | -12.1 | 88  |
| bta-miR-2355* | -11.5 | 78  |
| bta-miR-2355* | -10.7 | 286 |
| bta-miR-2355* | -10.3 | 143 |
| bta-miR-2355* | -10.1 | 514 |
| bta-miR-2355  | -24.3 | 95  |
| bta-miR-2355  | -23.5 | 577 |
| bta-miR-2355  | -22.6 | 164 |
| bta-miR-2355  | -22.4 | 256 |
| bta-miR-2355  | -21.5 | 58  |
| bta-miR-2355  | -21.4 | 484 |
| bta-miR-2355  | -20.0 | 190 |
| bta-miR-2355  | -19.9 | 395 |
| bta-miR-2355  | -18.2 | 613 |
| bta-miR-2355  | -17.4 | 236 |
| bta-miR-2355  | -17.4 | 466 |
| bta-miR-2355  | -16.8 | 445 |
| bta-miR-2355  | -16.7 | 363 |
| bta-miR-2355  | -16.4 | 4   |
| bta-miR-2355  | -16.0 | 139 |
| bta-miR-2355  | -15.1 | 337 |
| bta-miR-2355  | -14.3 | 74  |
| bta-miR-2355  | -14.1 | 639 |
| bta-miR-2355  | -14.0 | 117 |
| bta-miR-2355  | -13.4 | 692 |
| bta-miR-2355  | -13.4 | 625 |
| bta-miR-2355  | -12.9 | 513 |
| bta-miR-2355  | -12.7 | 34  |
| bta-miR-2355  | -11.3 | 276 |
| bta-miR-2355  | -11.2 | 713 |
| bta-miR-2355  | -10.4 | 502 |
| bta-miR-2355  | -10.2 | 316 |
| bta-miR-2355  | -10.1 | 551 |
| bta-miR-2356  | -28.8 | 128 |
| bta-miR-2356  | -24.5 | 276 |
| bta-miR-2356  | -23.6 | 192 |
| bta-miR-2356  | -21.8 | 100 |
| bta-miR-2356  | -20.7 | 421 |
| bta-miR-2356  | -20.5 | 237 |
| bta-miR-2356  | -19.8 | 707 |
| bta-miR-2356  | -19.4 | 474 |
| bta-miR-2356  | -19.3 | 39  |
| bta-miR-2356  | -19.2 | 572 |
| bta-miR-2356  | -18.8 | 259 |
| bta-miR-2356  | -18.7 | 309 |
| bta-miR-2356  | -18.3 | 625 |
| bta-miR-2356  | -17.8 | 351 |
| bta-miR-2356  | -17.8 | 9   |
| bta-miR-2356  | -17.7 | 163 |
| bta-miR-2356  | -17.6 | 502 |
| bta-miR-2356  | -16.6 | 82  |
| bta-miR-2356  | -16.0 | 390 |
| bta-miR-2356  | -15.1 | 58  |

|               |       |     |
|---------------|-------|-----|
| bta-miR-2356  | -14.6 | 542 |
| bta-miR-2356  | -13.8 | 376 |
| bta-miR-2356  | -12.8 | 596 |
| bta-miR-2356  | -12.2 | 71  |
| bta-miR-2356  | -12.2 | 454 |
| bta-miR-2356  | -11.6 | 692 |
| bta-miR-2356  | -11.4 | 329 |
| bta-miR-2356  | -11.3 | 521 |
| bta-miR-2356  | -10.5 | 675 |
| bta-miR-2356  | -10.4 | 740 |
| bta-miR-2356  | -10.0 | 1   |
| bta-miR-2357  | -25.4 | 353 |
| bta-miR-2357  | -25.1 | 147 |
| bta-miR-2357  | -24.1 | 106 |
| bta-miR-2357  | -23.8 | 382 |
| bta-miR-2357  | -22.5 | 540 |
| bta-miR-2357  | -22.3 | 55  |
| bta-miR-2357  | -22.3 | 514 |
| bta-miR-2357  | -21.6 | 461 |
| bta-miR-2357  | -20.6 | 6   |
| bta-miR-2357  | -20.6 | 86  |
| bta-miR-2357  | -19.4 | 654 |
| bta-miR-2357  | -19.3 | 577 |
| bta-miR-2357  | -18.5 | 276 |
| bta-miR-2357  | -17.5 | 420 |
| bta-miR-2357  | -16.3 | 624 |
| bta-miR-2357  | -15.9 | 38  |
| bta-miR-2357  | -15.8 | 206 |
| bta-miR-2357  | -15.6 | 256 |
| bta-miR-2357  | -15.2 | 489 |
| bta-miR-2357  | -15.2 | 428 |
| bta-miR-2357  | -14.6 | 681 |
| bta-miR-2357  | -13.6 | 235 |
| bta-miR-2357  | -12.4 | 172 |
| bta-miR-2357  | -12.3 | 740 |
| bta-miR-2357  | -11.8 | 599 |
| bta-miR-2357  | -10.8 | 130 |
| bta-miR-2357  | -10.8 | 244 |
| bta-miR-2357  | -10.6 | 638 |
| bta-miR-2357  | -10.6 | 369 |
| bta-miR-2357  | -10.4 | 325 |
| bta-miR-2284u | -19.6 | 442 |
| bta-miR-2284u | -19.4 | 220 |
| bta-miR-2284u | -16.5 | 101 |
| bta-miR-2284u | -16.4 | 338 |
| bta-miR-2284u | -16.2 | 405 |
| bta-miR-2284u | -15.7 | 11  |
| bta-miR-2284u | -15.3 | 592 |
| bta-miR-2284u | -15.2 | 166 |
| bta-miR-2284u | -14.7 | 269 |
| bta-miR-2284u | -14.6 | 47  |
| bta-miR-2284u | -14.4 | 177 |
| bta-miR-2284u | -14.3 | 608 |
| bta-miR-2284u | -14.2 | 735 |
| bta-miR-2284u | -13.7 | 506 |
| bta-miR-2284u | -13.5 | 80  |
| bta-miR-2284u | -13.0 | 470 |
| bta-miR-2284u | -12.9 | 357 |
| bta-miR-2284u | -12.6 | 308 |

|               |       |     |
|---------------|-------|-----|
| bta-miR-2284u | -12.3 | 629 |
| bta-miR-2284u | -12.0 | 563 |
| bta-miR-2284u | -11.6 | 124 |
| bta-miR-2284u | -11.1 | 240 |
| bta-miR-2284u | -10.9 | 24  |
| bta-miR-2358  | -20.3 | 401 |
| bta-miR-2358  | -20.2 | 161 |
| bta-miR-2358  | -20.0 | 461 |
| bta-miR-2358  | -19.4 | 317 |
| bta-miR-2358  | -19.1 | 354 |
| bta-miR-2358  | -19.1 | 572 |
| bta-miR-2358  | -18.3 | 692 |
| bta-miR-2358  | -18.0 | 502 |
| bta-miR-2358  | -17.9 | 236 |
| bta-miR-2358  | -17.2 | 127 |
| bta-miR-2358  | -17.1 | 14  |
| bta-miR-2358  | -16.1 | 90  |
| bta-miR-2358  | -15.2 | 626 |
| bta-miR-2358  | -14.4 | 277 |
| bta-miR-2358  | -13.7 | 533 |
| bta-miR-2358  | -13.1 | 206 |
| bta-miR-2358  | -12.9 | 55  |
| bta-miR-2358  | -12.9 | 480 |
| bta-miR-2358  | -12.9 | 590 |
| bta-miR-2358  | -12.8 | 143 |
| bta-miR-2358  | -12.3 | 426 |
| bta-miR-2358  | -11.9 | 662 |
| bta-miR-2358  | -11.8 | 729 |
| bta-miR-2358  | -11.7 | 178 |
| bta-miR-2358  | -11.5 | 561 |
| bta-miR-2358  | -11.4 | 382 |
| bta-miR-2358  | -11.0 | 188 |
| bta-miR-2358  | -10.9 | 120 |
| bta-miR-2358  | -10.1 | 646 |
| bta-miR-2358  | -10.1 | 309 |
| bta-miR-2358  | -10.0 | 711 |
| bta-miR-2359  | -17.5 | 218 |
| bta-miR-2359  | -16.3 | 101 |
| bta-miR-2359  | -16.1 | 174 |
| bta-miR-2359  | -15.8 | 445 |
| bta-miR-2359  | -15.6 | 610 |
| bta-miR-2359  | -13.1 | 196 |
| bta-miR-2359  | -13.1 | 479 |
| bta-miR-2359  | -12.3 | 366 |
| bta-miR-2359  | -12.1 | 598 |
| bta-miR-2359  | -11.8 | 348 |
| bta-miR-2359  | -11.3 | 153 |
| bta-miR-2359  | -10.9 | 506 |
| bta-miR-2359  | -10.8 | 725 |
| bta-miR-2359  | -10.8 | 68  |
| bta-miR-2359  | -10.7 | 239 |
| bta-miR-2359  | -10.1 | 12  |
| bta-miR-2359  | -10.1 | 268 |
| bta-miR-2360  | -32.5 | 412 |
| bta-miR-2360  | -30.4 | 463 |
| bta-miR-2360  | -30.3 | 562 |
| bta-miR-2360  | -27.2 | 118 |
| bta-miR-2360  | -26.9 | 380 |
| bta-miR-2360  | -24.8 | 306 |

|              |       |     |
|--------------|-------|-----|
| bta-miR-2360 | -24.2 | 509 |
| bta-miR-2360 | -23.8 | 70  |
| bta-miR-2360 | -23.5 | 230 |
| bta-miR-2360 | -22.7 | 13  |
| bta-miR-2360 | -22.2 | 153 |
| bta-miR-2360 | -21.6 | 42  |
| bta-miR-2360 | -20.7 | 270 |
| bta-miR-2360 | -20.4 | 343 |
| bta-miR-2360 | -20.0 | 184 |
| bta-miR-2360 | -19.4 | 654 |
| bta-miR-2360 | -18.5 | 621 |
| bta-miR-2360 | -18.1 | 538 |
| bta-miR-2360 | -17.4 | 681 |
| bta-miR-2360 | -17.2 | 487 |
| bta-miR-2360 | -15.8 | 728 |
| bta-miR-2360 | -13.7 | 589 |
| bta-miR-2360 | -13.3 | 701 |
| bta-miR-2360 | -12.4 | 5   |
| bta-miR-2360 | -12.2 | 261 |
| bta-miR-2360 | -10.0 | 407 |
| bta-miR-2361 | -17.5 | 606 |
| bta-miR-2361 | -16.4 | 172 |
| bta-miR-2361 | -15.2 | 348 |
| bta-miR-2361 | -14.4 | 101 |
| bta-miR-2361 | -13.2 | 149 |
| bta-miR-2361 | -12.7 | 223 |
| bta-miR-2361 | -12.3 | 405 |
| bta-miR-2361 | -12.3 | 440 |
| bta-miR-2361 | -12.1 | 371 |
| bta-miR-2361 | -11.9 | 189 |
| bta-miR-2361 | -11.8 | 723 |
| bta-miR-2361 | -11.4 | 271 |
| bta-miR-2361 | -11.2 | 469 |
| bta-miR-2361 | -10.7 | 47  |
| bta-miR-2361 | -10.3 | 122 |
| bta-miR-2361 | -10.1 | 332 |
| bta-miR-2362 | -22.9 | 449 |
| bta-miR-2362 | -22.6 | 200 |
| bta-miR-2362 | -21.6 | 617 |
| bta-miR-2362 | -21.4 | 235 |
| bta-miR-2362 | -20.8 | 67  |
| bta-miR-2362 | -20.6 | 277 |
| bta-miR-2362 | -20.5 | 505 |
| bta-miR-2362 | -20.1 | 89  |
| bta-miR-2362 | -19.5 | 44  |
| bta-miR-2362 | -19.3 | 576 |
| bta-miR-2362 | -18.8 | 551 |
| bta-miR-2362 | -18.3 | 128 |
| bta-miR-2362 | -18.1 | 332 |
| bta-miR-2362 | -17.6 | 482 |
| bta-miR-2362 | -17.4 | 8   |
| bta-miR-2362 | -16.9 | 395 |
| bta-miR-2362 | -16.4 | 414 |
| bta-miR-2362 | -14.7 | 354 |
| bta-miR-2362 | -13.0 | 174 |
| bta-miR-2362 | -12.7 | 116 |
| bta-miR-2362 | -12.5 | 311 |
| bta-miR-2362 | -12.3 | 28  |
| bta-miR-2362 | -12.3 | 153 |

|              |       |     |
|--------------|-------|-----|
| bta-miR-2362 | -12.3 | 692 |
| bta-miR-2362 | -11.8 | 659 |
| bta-miR-2362 | -11.3 | 380 |
| bta-miR-2362 | -11.0 | 737 |
| bta-miR-2362 | -10.2 | 220 |
| bta-miR-2362 | -10.2 | 531 |
| bta-miR-2362 | -10.1 | 605 |
| bta-miR-2363 | -19.9 | 16  |
| bta-miR-2363 | -19.6 | 564 |
| bta-miR-2363 | -19.3 | 422 |
| bta-miR-2363 | -18.1 | 476 |
| bta-miR-2363 | -17.5 | 400 |
| bta-miR-2363 | -16.5 | 357 |
| bta-miR-2363 | -15.8 | 209 |
| bta-miR-2363 | -15.5 | 79  |
| bta-miR-2363 | -14.7 | 580 |
| bta-miR-2363 | -14.5 | 690 |
| bta-miR-2363 | -13.4 | 496 |
| bta-miR-2363 | -13.4 | 521 |
| bta-miR-2363 | -13.2 | 303 |
| bta-miR-2363 | -13.1 | 714 |
| bta-miR-2363 | -12.9 | 248 |
| bta-miR-2363 | -12.9 | 659 |
| bta-miR-2363 | -12.7 | 111 |
| bta-miR-2363 | -12.7 | 535 |
| bta-miR-2363 | -12.5 | 626 |
| bta-miR-2363 | -12.3 | 191 |
| bta-miR-2363 | -12.1 | 229 |
| bta-miR-2363 | -12.0 | 59  |
| bta-miR-2363 | -11.8 | 145 |
| bta-miR-2363 | -11.7 | 325 |
| bta-miR-2363 | -11.3 | 443 |
| bta-miR-2363 | -11.1 | 461 |
| bta-miR-2363 | -10.8 | 372 |
| bta-miR-2363 | -10.8 | 120 |
| bta-miR-2363 | -10.6 | 605 |
| bta-miR-2363 | -10.3 | 163 |
| bta-miR-2363 | -10.3 | 341 |
| bta-miR-2363 | -10.1 | 378 |
| bta-miR-2364 | -27.7 | 427 |
| bta-miR-2364 | -27.4 | 132 |
| bta-miR-2364 | -26.8 | 185 |
| bta-miR-2364 | -26.1 | 30  |
| bta-miR-2364 | -25.0 | 87  |
| bta-miR-2364 | -24.8 | 109 |
| bta-miR-2364 | -24.6 | 378 |
| bta-miR-2364 | -23.4 | 244 |
| bta-miR-2364 | -23.4 | 473 |
| bta-miR-2364 | -23.2 | 156 |
| bta-miR-2364 | -23.1 | 206 |
| bta-miR-2364 | -22.9 | 582 |
| bta-miR-2364 | -22.3 | 324 |
| bta-miR-2364 | -20.0 | 360 |
| bta-miR-2364 | -19.2 | 561 |
| bta-miR-2364 | -19.0 | 395 |
| bta-miR-2364 | -18.6 | 307 |
| bta-miR-2364 | -18.4 | 457 |
| bta-miR-2364 | -17.6 | 502 |
| bta-miR-2364 | -16.1 | 3   |

|              |       |     |
|--------------|-------|-----|
| bta-miR-2364 | -14.0 | 668 |
| bta-miR-2364 | -13.3 | 697 |
| bta-miR-2364 | -12.8 | 235 |
| bta-miR-2364 | -12.7 | 271 |
| bta-miR-2364 | -12.5 | 626 |
| bta-miR-2364 | -12.4 | 283 |
| bta-miR-2364 | -12.0 | 524 |
| bta-miR-2364 | -11.4 | 644 |
| bta-miR-2364 | -10.9 | 20  |
| bta-miR-2364 | -10.5 | 740 |
| bta-miR-2364 | -10.3 | 447 |
| bta-miR-2364 | -10.3 | 126 |
| bta-miR-2365 | -20.1 | 443 |
| bta-miR-2365 | -19.8 | 592 |
| bta-miR-2365 | -17.8 | 94  |
| bta-miR-2365 | -15.7 | 175 |
| bta-miR-2365 | -15.7 | 347 |
| bta-miR-2365 | -15.3 | 266 |
| bta-miR-2365 | -15.2 | 479 |
| bta-miR-2365 | -14.6 | 36  |
| bta-miR-2365 | -14.4 | 612 |
| bta-miR-2365 | -14.2 | 405 |
| bta-miR-2365 | -13.8 | 227 |
| bta-miR-2365 | -13.4 | 198 |
| bta-miR-2365 | -13.1 | 68  |
| bta-miR-2365 | -11.6 | 505 |
| bta-miR-2365 | -11.4 | 728 |
| bta-miR-2365 | -11.4 | 15  |
| bta-miR-2365 | -11.2 | 653 |
| bta-miR-2365 | -10.7 | 151 |
| bta-miR-2366 | -26.9 | 200 |
| bta-miR-2366 | -25.2 | 515 |
| bta-miR-2366 | -25.0 | 622 |
| bta-miR-2366 | -23.7 | 462 |
| bta-miR-2366 | -23.0 | 9   |
| bta-miR-2366 | -22.5 | 363 |
| bta-miR-2366 | -22.3 | 127 |
| bta-miR-2366 | -22.3 | 567 |
| bta-miR-2366 | -21.9 | 409 |
| bta-miR-2366 | -20.4 | 84  |
| bta-miR-2366 | -20.1 | 241 |
| bta-miR-2366 | -19.9 | 280 |
| bta-miR-2366 | -19.9 | 164 |
| bta-miR-2366 | -19.0 | 51  |
| bta-miR-2366 | -18.0 | 107 |
| bta-miR-2366 | -17.9 | 670 |
| bta-miR-2366 | -16.4 | 392 |
| bta-miR-2366 | -15.6 | 325 |
| bta-miR-2366 | -15.3 | 710 |
| bta-miR-2366 | -14.7 | 639 |
| bta-miR-2366 | -14.6 | 499 |
| bta-miR-2366 | -14.5 | 429 |
| bta-miR-2366 | -12.7 | 71  |
| bta-miR-2366 | -12.4 | 654 |
| bta-miR-2366 | -11.8 | 269 |
| bta-miR-2366 | -11.7 | 603 |
| bta-miR-2366 | -11.7 | 693 |
| bta-miR-2366 | -11.5 | 39  |
| bta-miR-2366 | -10.7 | 1   |



|               |       |     |
|---------------|-------|-----|
| bta-miR-2366  | -10.4 | 311 |
| bta-miR-2366  | -10.4 | 588 |
| bta-miR-2366  | -10.3 | 154 |
| bta-miR-2366  | -10.3 | 351 |
| bta-miR-2366  | -10.2 | 386 |
| bta-miR-2284f | -16.7 | 443 |
| bta-miR-2284f | -15.1 | 173 |
| bta-miR-2284f | -14.9 | 232 |
| bta-miR-2284f | -13.9 | 258 |
| bta-miR-2284f | -13.7 | 60  |
| bta-miR-2284f | -13.6 | 97  |
| bta-miR-2284f | -13.4 | 416 |
| bta-miR-2284f | -13.4 | 596 |
| bta-miR-2284f | -13.0 | 14  |
| bta-miR-2284f | -12.8 | 499 |
| bta-miR-2284f | -12.7 | 620 |
| bta-miR-2284f | -12.6 | 338 |
| bta-miR-2284f | -12.3 | 460 |
| bta-miR-2284f | -12.1 | 215 |
| bta-miR-2284f | -11.9 | 369 |
| bta-miR-2284f | -11.5 | 77  |
| bta-miR-2284f | -11.1 | 309 |
| bta-miR-2284f | -11.0 | 566 |
| bta-miR-2284f | -11.0 | 689 |
| bta-miR-2284f | -10.9 | 202 |
| bta-miR-2284f | -10.8 | 276 |
| bta-miR-2284f | -10.7 | 574 |
| bta-miR-2284f | -10.5 | 724 |
| bta-miR-2284a | -19.7 | 168 |
| bta-miR-2284a | -18.9 | 357 |
| bta-miR-2284a | -18.3 | 47  |
| bta-miR-2284a | -17.6 | 470 |
| bta-miR-2284a | -17.4 | 240 |
| bta-miR-2284a | -17.3 | 327 |
| bta-miR-2284a | -17.2 | 28  |
| bta-miR-2284a | -16.6 | 108 |
| bta-miR-2284a | -16.5 | 260 |
| bta-miR-2284a | -16.5 | 506 |
| bta-miR-2284a | -16.4 | 405 |
| bta-miR-2284a | -15.4 | 273 |
| bta-miR-2284a | -15.1 | 429 |
| bta-miR-2284a | -15.0 | 188 |
| bta-miR-2284a | -14.4 | 141 |
| bta-miR-2284a | -14.1 | 306 |
| bta-miR-2284a | -14.0 | 129 |
| bta-miR-2284a | -14.0 | 620 |
| bta-miR-2284a | -13.3 | 320 |
| bta-miR-2284a | -13.0 | 90  |
| bta-miR-2284a | -12.9 | 689 |
| bta-miR-2284a | -12.8 | 592 |
| bta-miR-2284a | -12.7 | 710 |
| bta-miR-2284a | -12.1 | 442 |
| bta-miR-2284a | -12.0 | 557 |
| bta-miR-2284a | -11.8 | 159 |
| bta-miR-2284a | -11.4 | 81  |
| bta-miR-2284a | -11.2 | 574 |
| bta-miR-2284a | -11.0 | 208 |
| bta-miR-2284a | -10.2 | 340 |
| bta-miR-2284a | -10.1 | 223 |

|               |       |     |
|---------------|-------|-----|
| bta-miR-2284a | -10.1 | 668 |
| bta-miR-2284k | -22.8 | 405 |
| bta-miR-2284k | -21.5 | 357 |
| bta-miR-2284k | -17.9 | 470 |
| bta-miR-2284k | -17.8 | 162 |
| bta-miR-2284k | -17.5 | 506 |
| bta-miR-2284k | -17.4 | 47  |
| bta-miR-2284k | -16.4 | 102 |
| bta-miR-2284k | -16.4 | 423 |
| bta-miR-2284k | -15.7 | 567 |
| bta-miR-2284k | -15.7 | 731 |
| bta-miR-2284k | -15.3 | 28  |
| bta-miR-2284k | -15.2 | 240 |
| bta-miR-2284k | -15.0 | 453 |
| bta-miR-2284k | -14.7 | 124 |
| bta-miR-2284k | -14.5 | 574 |
| bta-miR-2284k | -14.4 | 620 |
| bta-miR-2284k | -14.3 | 273 |
| bta-miR-2284k | -14.0 | 186 |
| bta-miR-2284k | -13.9 | 9   |
| bta-miR-2284k | -13.6 | 596 |
| bta-miR-2284k | -13.5 | 306 |
| bta-miR-2284k | -13.4 | 83  |
| bta-miR-2284k | -13.2 | 338 |
| bta-miR-2284k | -13.0 | 323 |
| bta-miR-2284k | -12.7 | 652 |
| bta-miR-2284k | -12.2 | 173 |
| bta-miR-2284k | -12.2 | 222 |
| bta-miR-2284k | -12.0 | 701 |
| bta-miR-2284k | -11.6 | 208 |
| bta-miR-2284k | -11.1 | 541 |
| bta-miR-2284k | -10.6 | 557 |
| bta-miR-2284k | -10.5 | 385 |
| bta-miR-2284k | -10.3 | 490 |
| bta-miR-2284k | -10.2 | 142 |
| bta-miR-1814b | -17.1 | 371 |
| bta-miR-1814b | -16.9 | 485 |
| bta-miR-1814b | -14.0 | 556 |
| bta-miR-1814b | -13.9 | 197 |
| bta-miR-1814b | -13.7 | 104 |
| bta-miR-1814b | -13.7 | 648 |
| bta-miR-1814b | -13.3 | 406 |
| bta-miR-1814b | -13.3 | 454 |
| bta-miR-1814b | -13.0 | 148 |
| bta-miR-1814b | -12.8 | 269 |
| bta-miR-1814b | -12.6 | 731 |
| bta-miR-1814b | -12.3 | 332 |
| bta-miR-1814b | -12.1 | 178 |
| bta-miR-1814b | -12.1 | 603 |
| bta-miR-1814b | -12.0 | 123 |
| bta-miR-1814b | -10.9 | 65  |
| bta-miR-1814b | -10.1 | 586 |
| bta-miR-1814b | -10.1 | 218 |
| bta-miR-1814b | -10.0 | 35  |
| bta-miR-2367  | -26.7 | 475 |
| bta-miR-2367  | -26.3 | 5   |
| bta-miR-2367  | -26.0 | 416 |
| bta-miR-2367  | -25.1 | 567 |
| bta-miR-2367  | -21.6 | 614 |

|               |       |     |
|---------------|-------|-----|
| bta-miR-2367  | -20.5 | 60  |
| bta-miR-2367  | -18.2 | 345 |
| bta-miR-2367  | -18.0 | 215 |
| bta-miR-2367  | -17.1 | 262 |
| bta-miR-2367  | -16.3 | 92  |
| bta-miR-2367  | -15.1 | 155 |
| bta-miR-2367  | -14.8 | 450 |
| bta-miR-2367  | -14.1 | 740 |
| bta-miR-2367  | -13.4 | 657 |
| bta-miR-2367  | -13.2 | 185 |
| bta-miR-2367  | -12.5 | 541 |
| bta-miR-2367  | -12.1 | 26  |
| bta-miR-2367  | -11.8 | 692 |
| bta-miR-2367  | -10.7 | 403 |
| bta-miR-2367  | -10.3 | 502 |
| bta-miR-2367  | -10.1 | 386 |
| bta-miR-2367* | -20.4 | 399 |
| bta-miR-2367* | -19.9 | 59  |
| bta-miR-2367* | -19.8 | 512 |
| bta-miR-2367* | -18.1 | 368 |
| bta-miR-2367* | -17.5 | 111 |
| bta-miR-2367* | -17.2 | 626 |
| bta-miR-2367* | -17.2 | 356 |
| bta-miR-2367* | -16.9 | 474 |
| bta-miR-2367* | -16.5 | 261 |
| bta-miR-2367* | -16.0 | 552 |
| bta-miR-2367* | -15.9 | 580 |
| bta-miR-2367* | -15.6 | 657 |
| bta-miR-2367* | -15.5 | 90  |
| bta-miR-2367* | -15.3 | 5   |
| bta-miR-2367* | -15.2 | 33  |
| bta-miR-2367* | -14.5 | 289 |
| bta-miR-2367* | -14.5 | 421 |
| bta-miR-2367* | -14.0 | 236 |
| bta-miR-2367* | -14.0 | 680 |
| bta-miR-2367* | -13.1 | 146 |
| bta-miR-2367* | -13.0 | 81  |
| bta-miR-2367* | -13.0 | 537 |
| bta-miR-2367* | -12.4 | 740 |
| bta-miR-2367* | -12.0 | 15  |
| bta-miR-2367* | -11.7 | 431 |
| bta-miR-2367* | -11.6 | 461 |
| bta-miR-2367* | -11.6 | 191 |
| bta-miR-2367* | -11.4 | 386 |
| bta-miR-2367* | -11.4 | 714 |
| bta-miR-2367* | -11.2 | 167 |
| bta-miR-2367* | -10.7 | 25  |
| bta-miR-2367* | -10.6 | 491 |
| bta-miR-2367* | -10.5 | 51  |
| bta-miR-2367* | -10.5 | 126 |
| bta-miR-2367* | -10.2 | 249 |
| bta-miR-2367* | -10.2 | 566 |
| bta-miR-2368  | -28.0 | 410 |
| bta-miR-2368  | -25.5 | 228 |
| bta-miR-2368  | -23.4 | 100 |
| bta-miR-2368  | -22.2 | 454 |
| bta-miR-2368  | -21.4 | 592 |
| bta-miR-2368  | -21.3 | 571 |
| bta-miR-2368  | -21.2 | 67  |

|               |       |     |
|---------------|-------|-----|
| bta-miR-2368  | -20.8 | 149 |
| bta-miR-2368  | -20.8 | 499 |
| bta-miR-2368  | -20.6 | 9   |
| bta-miR-2368  | -20.4 | 306 |
| bta-miR-2368  | -20.2 | 126 |
| bta-miR-2368  | -19.9 | 198 |
| bta-miR-2368  | -19.7 | 41  |
| bta-miR-2368  | -19.4 | 351 |
| bta-miR-2368  | -18.9 | 620 |
| bta-miR-2368  | -18.1 | 553 |
| bta-miR-2368  | -16.9 | 264 |
| bta-miR-2368  | -16.7 | 481 |
| bta-miR-2368  | -16.4 | 165 |
| bta-miR-2368  | -16.4 | 323 |
| bta-miR-2368  | -14.9 | 653 |
| bta-miR-2368  | -14.8 | 376 |
| bta-miR-2368  | -14.7 | 739 |
| bta-miR-2368  | -14.6 | 278 |
| bta-miR-2368  | -14.5 | 705 |
| bta-miR-2368  | -13.7 | 515 |
| bta-miR-2368  | -10.8 | 607 |
| bta-miR-2368  | -10.7 | 442 |
| bta-miR-2368  | -10.4 | 139 |
| bta-miR-2368  | -10.4 | 338 |
| bta-miR-2368* | -24.8 | 605 |
| bta-miR-2368* | -22.0 | 66  |
| bta-miR-2368* | -21.5 | 12  |
| bta-miR-2368* | -20.4 | 494 |
| bta-miR-2368* | -19.8 | 414 |
| bta-miR-2368* | -19.8 | 448 |
| bta-miR-2368* | -19.1 | 172 |
| bta-miR-2368* | -18.5 | 654 |
| bta-miR-2368* | -18.1 | 199 |
| bta-miR-2368* | -17.5 | 555 |
| bta-miR-2368* | -16.0 | 349 |
| bta-miR-2368* | -15.3 | 264 |
| bta-miR-2368* | -14.3 | 107 |
| bta-miR-2368* | -14.3 | 630 |
| bta-miR-2368* | -13.1 | 228 |
| bta-miR-2368* | -12.6 | 376 |
| bta-miR-2368* | -12.2 | 37  |
| bta-miR-2368* | -11.4 | 737 |
| bta-miR-2368* | -11.2 | 584 |
| bta-miR-2368* | -10.3 | 4   |
| bta-miR-2368* | -10.1 | 155 |
| bta-miR-2369  | -21.8 | 104 |
| bta-miR-2369  | -21.7 | 351 |
| bta-miR-2369  | -19.8 | 405 |
| bta-miR-2369  | -19.2 | 22  |
| bta-miR-2369  | -17.5 | 46  |
| bta-miR-2369  | -17.4 | 154 |
| bta-miR-2369  | -17.3 | 371 |
| bta-miR-2369  | -17.1 | 269 |
| bta-miR-2369  | -16.8 | 124 |
| bta-miR-2369  | -16.8 | 731 |
| bta-miR-2369  | -16.6 | 494 |
| bta-miR-2369  | -16.2 | 197 |
| bta-miR-2369  | -16.1 | 470 |
| bta-miR-2369  | -16.0 | 240 |

|               |       |     |
|---------------|-------|-----|
| bta-miR-2369  | -15.6 | 324 |
| bta-miR-2369  | -15.5 | 558 |
| bta-miR-2369  | -14.2 | 589 |
| bta-miR-2369  | -14.2 | 178 |
| bta-miR-2369  | -13.3 | 448 |
| bta-miR-2369  | -13.3 | 514 |
| bta-miR-2369  | -13.3 | 616 |
| bta-miR-2369  | -13.2 | 301 |
| bta-miR-2369  | -13.0 | 652 |
| bta-miR-2369  | -12.5 | 69  |
| bta-miR-2369  | -11.7 | 430 |
| bta-miR-2369  | -11.7 | 695 |
| bta-miR-2369  | -11.3 | 6   |
| bta-miR-2369  | -11.0 | 145 |
| bta-miR-2369  | -10.6 | 338 |
| bta-miR-2369  | -10.4 | 260 |
| bta-miR-2369  | -10.0 | 574 |
| bta-miR-2370  | -18.6 | 155 |
| bta-miR-2370  | -18.5 | 669 |
| bta-miR-2370  | -17.4 | 698 |
| bta-miR-2370  | -17.0 | 243 |
| bta-miR-2370  | -16.7 | 18  |
| bta-miR-2370  | -16.6 | 569 |
| bta-miR-2370  | -16.5 | 125 |
| bta-miR-2370  | -16.4 | 63  |
| bta-miR-2370  | -16.2 | 407 |
| bta-miR-2370  | -15.8 | 633 |
| bta-miR-2370  | -14.9 | 183 |
| bta-miR-2370  | -14.3 | 340 |
| bta-miR-2370  | -14.3 | 377 |
| bta-miR-2370  | -14.3 | 482 |
| bta-miR-2370  | -14.2 | 95  |
| bta-miR-2370  | -13.9 | 456 |
| bta-miR-2370  | -13.4 | 304 |
| bta-miR-2370  | -12.3 | 282 |
| bta-miR-2370  | -12.3 | 50  |
| bta-miR-2370  | -11.6 | 509 |
| bta-miR-2370  | -11.1 | 365 |
| bta-miR-2370  | -10.9 | 330 |
| bta-miR-2370  | -10.4 | 732 |
| bta-miR-2370  | -10.4 | 524 |
| bta-miR-2370* | -27.6 | 441 |
| bta-miR-2370* | -22.7 | 605 |
| bta-miR-2370* | -18.4 | 498 |
| bta-miR-2370* | -18.1 | 231 |
| bta-miR-2370* | -18.0 | 69  |
| bta-miR-2370* | -17.5 | 202 |
| bta-miR-2370* | -16.7 | 267 |
| bta-miR-2370* | -16.0 | 735 |
| bta-miR-2370* | -15.8 | 171 |
| bta-miR-2370* | -15.2 | 348 |
| bta-miR-2370* | -15.0 | 478 |
| bta-miR-2370* | -14.5 | 413 |
| bta-miR-2370* | -14.0 | 366 |
| bta-miR-2370* | -13.7 | 11  |
| bta-miR-2370* | -13.7 | 570 |
| bta-miR-2370* | -13.2 | 629 |
| bta-miR-2370* | -13.0 | 25  |
| bta-miR-2370* | -12.0 | 548 |

|               |       |     |
|---------------|-------|-----|
| bta-miR-2370* | -10.2 | 696 |
| bta-miR-2370* | -10.1 | 101 |
| bta-miR-2371  | -20.1 | 147 |
| bta-miR-2371  | -19.6 | 47  |
| bta-miR-2371  | -16.8 | 366 |
| bta-miR-2371  | -16.4 | 405 |
| bta-miR-2371  | -16.3 | 470 |
| bta-miR-2371  | -16.1 | 119 |
| bta-miR-2371  | -14.4 | 338 |
| bta-miR-2371  | -13.7 | 725 |
| bta-miR-2371  | -13.5 | 506 |
| bta-miR-2371  | -13.2 | 188 |
| bta-miR-2371  | -13.0 | 557 |
| bta-miR-2371  | -12.8 | 598 |
| bta-miR-2371  | -12.8 | 381 |
| bta-miR-2371  | -12.5 | 570 |
| bta-miR-2371  | -12.4 | 66  |
| bta-miR-2371  | -12.3 | 94  |
| bta-miR-2371  | -12.2 | 166 |
| bta-miR-2371  | -12.0 | 453 |
| bta-miR-2371  | -11.5 | 28  |
| bta-miR-2371  | -11.4 | 484 |
| bta-miR-2371  | -11.3 | 648 |
| bta-miR-2371  | -11.2 | 325 |
| bta-miR-2371  | -11.2 | 620 |
| bta-miR-2371  | -10.9 | 273 |
| bta-miR-2371  | -10.9 | 232 |
| bta-miR-2371  | -10.8 | 313 |
| bta-miR-2371  | -10.6 | 108 |
| bta-miR-2371  | -10.4 | 16  |
| bta-miR-2371  | -10.1 | 429 |
| bta-miR-2371  | -10.0 | 215 |
| bta-miR-2372  | -18.8 | 130 |
| bta-miR-2372  | -18.8 | 514 |
| bta-miR-2372  | -18.1 | 365 |
| bta-miR-2372  | -17.0 | 275 |
| bta-miR-2372  | -16.9 | 27  |
| bta-miR-2372  | -16.8 | 85  |
| bta-miR-2372  | -16.7 | 623 |
| bta-miR-2372  | -16.4 | 670 |
| bta-miR-2372  | -16.0 | 424 |
| bta-miR-2372  | -16.0 | 162 |
| bta-miR-2372  | -16.0 | 569 |
| bta-miR-2372  | -14.8 | 242 |
| bta-miR-2372  | -14.5 | 185 |
| bta-miR-2372  | -14.4 | 465 |
| bta-miR-2372  | -14.0 | 711 |
| bta-miR-2372  | -13.9 | 229 |
| bta-miR-2372  | -13.5 | 307 |
| bta-miR-2372  | -13.5 | 12  |
| bta-miR-2372  | -13.3 | 392 |
| bta-miR-2372  | -12.9 | 109 |
| bta-miR-2372  | -12.7 | 583 |
| bta-miR-2372  | -12.2 | 324 |
| bta-miR-2372  | -11.5 | 404 |
| bta-miR-2372  | -11.4 | 455 |
| bta-miR-2372  | -11.4 | 738 |
| bta-miR-2372  | -10.2 | 413 |
| bta-miR-2372  | -10.2 | 650 |

|               |       |     |
|---------------|-------|-----|
| bta-miR-2372  | -10.1 | 66  |
| bta-miR-2372  | -10.1 | 1   |
| bta-miR-2372  | -10.0 | 493 |
| bta-miR-2373  | -33.4 | 425 |
| bta-miR-2373  | -29.4 | 359 |
| bta-miR-2373  | -27.0 | 596 |
| bta-miR-2373  | -26.9 | 403 |
| bta-miR-2373  | -25.9 | 163 |
| bta-miR-2373  | -24.9 | 462 |
| bta-miR-2373  | -23.3 | 242 |
| bta-miR-2373  | -23.2 | 622 |
| bta-miR-2373  | -22.5 | 81  |
| bta-miR-2373  | -22.4 | 27  |
| bta-miR-2373  | -22.2 | 199 |
| bta-miR-2373  | -22.0 | 483 |
| bta-miR-2373  | -22.0 | 563 |
| bta-miR-2373  | -20.7 | 4   |
| bta-miR-2373  | -18.8 | 119 |
| bta-miR-2373  | -17.9 | 650 |
| bta-miR-2373  | -16.7 | 515 |
| bta-miR-2373  | -15.7 | 577 |
| bta-miR-2373  | -15.5 | 231 |
| bta-miR-2373  | -15.1 | 185 |
| bta-miR-2373  | -14.2 | 325 |
| bta-miR-2373  | -14.2 | 738 |
| bta-miR-2373  | -13.9 | 614 |
| bta-miR-2373  | -13.6 | 539 |
| bta-miR-2373  | -13.4 | 308 |
| bta-miR-2373  | -12.8 | 455 |
| bta-miR-2373  | -12.6 | 281 |
| bta-miR-2373  | -12.3 | 664 |
| bta-miR-2373  | -11.6 | 378 |
| bta-miR-2373  | -11.1 | 698 |
| bta-miR-2373  | -10.5 | 136 |
| bta-miR-2373  | -10.4 | 587 |
| bta-miR-2373  | -10.2 | 634 |
| bta-miR-2373* | -33.1 | 395 |
| bta-miR-2373* | -26.6 | 85  |
| bta-miR-2373* | -23.7 | 457 |
| bta-miR-2373* | -22.8 | 58  |
| bta-miR-2373* | -22.8 | 507 |
| bta-miR-2373* | -22.7 | 5   |
| bta-miR-2373* | -22.7 | 576 |
| bta-miR-2373* | -20.9 | 252 |
| bta-miR-2373* | -20.8 | 155 |
| bta-miR-2373* | -20.2 | 120 |
| bta-miR-2373* | -20.2 | 616 |
| bta-miR-2373* | -17.5 | 632 |
| bta-miR-2373* | -16.7 | 344 |
| bta-miR-2373* | -16.6 | 424 |
| bta-miR-2373* | -16.3 | 211 |
| bta-miR-2373* | -16.3 | 551 |
| bta-miR-2373* | -16.2 | 310 |
| bta-miR-2373* | -15.5 | 39  |
| bta-miR-2373* | -14.9 | 185 |
| bta-miR-2373* | -14.1 | 374 |
| bta-miR-2373* | -14.0 | 489 |
| bta-miR-2373* | -13.7 | 691 |
| bta-miR-2373* | -13.5 | 283 |

|               |       |     |
|---------------|-------|-----|
| bta-miR-2373* | -13.4 | 23  |
| bta-miR-2373* | -13.2 | 717 |
| bta-miR-2373* | -12.4 | 136 |
| bta-miR-2373* | -11.5 | 537 |
| bta-miR-2373* | -11.5 | 677 |
| bta-miR-2373* | -11.5 | 668 |
| bta-miR-2374  | -34.1 | 307 |
| bta-miR-2374  | -34.0 | 120 |
| bta-miR-2374  | -28.4 | 395 |
| bta-miR-2374  | -28.0 | 561 |
| bta-miR-2374  | -27.8 | 156 |
| bta-miR-2374  | -27.6 | 91  |
| bta-miR-2374  | -26.0 | 245 |
| bta-miR-2374  | -25.7 | 461 |
| bta-miR-2374  | -23.8 | 2   |
| bta-miR-2374  | -23.5 | 413 |
| bta-miR-2374  | -21.0 | 491 |
| bta-miR-2374  | -20.4 | 185 |
| bta-miR-2374  | -20.4 | 342 |
| bta-miR-2374  | -19.2 | 51  |
| bta-miR-2374  | -19.1 | 283 |
| bta-miR-2374  | -16.9 | 211 |
| bta-miR-2374  | -16.4 | 684 |
| bta-miR-2374  | -15.1 | 633 |
| bta-miR-2374  | -14.8 | 707 |
| bta-miR-2374  | -14.7 | 73  |
| bta-miR-2374  | -13.4 | 654 |
| bta-miR-2374  | -13.1 | 380 |
| bta-miR-2374  | -12.6 | 623 |
| bta-miR-2374  | -12.4 | 530 |
| bta-miR-2374  | -12.2 | 477 |
| bta-miR-2374  | -12.1 | 34  |
| bta-miR-2374  | -10.9 | 740 |
| bta-miR-2374  | -10.6 | 170 |
| bta-miR-2375  | -25.2 | 238 |
| bta-miR-2375  | -25.1 | 566 |
| bta-miR-2375  | -24.3 | 38  |
| bta-miR-2375  | -24.3 | 393 |
| bta-miR-2375  | -22.3 | 1   |
| bta-miR-2375  | -22.1 | 128 |
| bta-miR-2375  | -21.9 | 454 |
| bta-miR-2375  | -21.8 | 81  |
| bta-miR-2375  | -19.9 | 277 |
| bta-miR-2375  | -19.9 | 617 |
| bta-miR-2375  | -19.5 | 500 |
| bta-miR-2375  | -18.8 | 200 |
| bta-miR-2375  | -17.8 | 154 |
| bta-miR-2375  | -17.7 | 423 |
| bta-miR-2375  | -17.6 | 635 |
| bta-miR-2375  | -17.4 | 711 |
| bta-miR-2375  | -16.8 | 589 |
| bta-miR-2375  | -16.7 | 543 |
| bta-miR-2375  | -16.5 | 355 |
| bta-miR-2375  | -16.3 | 305 |
| bta-miR-2375  | -15.2 | 376 |
| bta-miR-2375  | -13.9 | 182 |
| bta-miR-2375  | -13.3 | 659 |
| bta-miR-2375  | -12.5 | 24  |
| bta-miR-2375  | -12.5 | 71  |



|              |       |     |
|--------------|-------|-----|
| bta-miR-2375 | -12.2 | 481 |
| bta-miR-2375 | -11.3 | 691 |
| bta-miR-2375 | -10.8 | 116 |
| bta-miR-2375 | -10.7 | 676 |
| bta-miR-2375 | -10.0 | 530 |
| bta-miR-2376 | -28.7 | 480 |
| bta-miR-2376 | -24.2 | 559 |
| bta-miR-2376 | -23.7 | 423 |
| bta-miR-2376 | -23.6 | 167 |
| bta-miR-2376 | -23.3 | 51  |
| bta-miR-2376 | -22.7 | 608 |
| bta-miR-2376 | -21.9 | 258 |
| bta-miR-2376 | -20.8 | 115 |
| bta-miR-2376 | -18.7 | 358 |
| bta-miR-2376 | -18.7 | 205 |
| bta-miR-2376 | -18.2 | 7   |
| bta-miR-2376 | -17.3 | 517 |
| bta-miR-2376 | -16.3 | 30  |
| bta-miR-2376 | -16.1 | 584 |
| bta-miR-2376 | -15.6 | 408 |
| bta-miR-2376 | -15.5 | 86  |
| bta-miR-2376 | -14.3 | 698 |
| bta-miR-2376 | -13.8 | 633 |
| bta-miR-2376 | -13.5 | 307 |
| bta-miR-2376 | -12.2 | 388 |
| bta-miR-2376 | -12.1 | 344 |
| bta-miR-2376 | -11.7 | 451 |
| bta-miR-2376 | -11.7 | 456 |
| bta-miR-2376 | -11.3 | 668 |
| bta-miR-2376 | -11.2 | 737 |
| bta-miR-2376 | -11.0 | 282 |
| bta-miR-2376 | -10.9 | 108 |
| bta-miR-2376 | -10.5 | 243 |
| bta-miR-2376 | -10.3 | 546 |
| bta-miR-2377 | -23.1 | 11  |
| bta-miR-2377 | -23.0 | 480 |
| bta-miR-2377 | -22.7 | 570 |
| bta-miR-2377 | -21.9 | 50  |
| bta-miR-2377 | -21.1 | 615 |
| bta-miR-2377 | -20.9 | 411 |
| bta-miR-2377 | -20.4 | 70  |
| bta-miR-2377 | -20.0 | 499 |
| bta-miR-2377 | -19.5 | 241 |
| bta-miR-2377 | -19.4 | 108 |
| bta-miR-2377 | -19.4 | 366 |
| bta-miR-2377 | -19.0 | 28  |
| bta-miR-2377 | -18.0 | 203 |
| bta-miR-2377 | -16.3 | 454 |
| bta-miR-2377 | -16.2 | 653 |
| bta-miR-2377 | -15.7 | 280 |
| bta-miR-2377 | -15.3 | 166 |
| bta-miR-2377 | -14.4 | 592 |
| bta-miR-2377 | -13.9 | 532 |
| bta-miR-2377 | -13.2 | 349 |
| bta-miR-2377 | -12.5 | 442 |
| bta-miR-2377 | -12.3 | 223 |
| bta-miR-2377 | -12.1 | 4   |
| bta-miR-2377 | -12.0 | 737 |
| bta-miR-2377 | -11.6 | 472 |

|              |       |     |
|--------------|-------|-----|
| bta-miR-2377 | -11.3 | 386 |
| bta-miR-2377 | -11.0 | 268 |
| bta-miR-2377 | -10.9 | 548 |
| bta-miR-2377 | -10.6 | 429 |
| bta-miR-2377 | -10.3 | 308 |
| bta-miR-2377 | -10.2 | 669 |
| bta-miR-2377 | -10.1 | 96  |
| bta-miR-2378 | -28.8 | 110 |
| bta-miR-2378 | -24.9 | 247 |
| bta-miR-2378 | -23.8 | 416 |
| bta-miR-2378 | -22.9 | 484 |
| bta-miR-2378 | -21.7 | 14  |
| bta-miR-2378 | -21.5 | 342 |
| bta-miR-2378 | -20.3 | 142 |
| bta-miR-2378 | -19.7 | 580 |
| bta-miR-2378 | -18.3 | 73  |
| bta-miR-2378 | -18.2 | 191 |
| bta-miR-2378 | -18.1 | 693 |
| bta-miR-2378 | -17.7 | 368 |
| bta-miR-2378 | -16.5 | 290 |
| bta-miR-2378 | -16.5 | 386 |
| bta-miR-2378 | -15.2 | 625 |
| bta-miR-2378 | -15.1 | 457 |
| bta-miR-2378 | -14.4 | 211 |
| bta-miR-2378 | -14.3 | 96  |
| bta-miR-2378 | -14.2 | 511 |
| bta-miR-2378 | -14.1 | 552 |
| bta-miR-2378 | -13.7 | 321 |
| bta-miR-2378 | -13.0 | 172 |
| bta-miR-2378 | -12.7 | 43  |
| bta-miR-2378 | -12.4 | 657 |
| bta-miR-2378 | -11.9 | 436 |
| bta-miR-2378 | -11.7 | 730 |
| bta-miR-2378 | -10.8 | 606 |
| bta-miR-2378 | -10.6 | 58  |
| bta-miR-2378 | -10.6 | 330 |
| bta-miR-2378 | -10.2 | 530 |
| bta-miR-2378 | -10.2 | 642 |
| bta-miR-2378 | -10.1 | 2   |
| bta-miR-2379 | -24.2 | 398 |
| bta-miR-2379 | -21.7 | 58  |
| bta-miR-2379 | -21.5 | 475 |
| bta-miR-2379 | -20.7 | 88  |
| bta-miR-2379 | -20.1 | 227 |
| bta-miR-2379 | -19.8 | 501 |
| bta-miR-2379 | -19.3 | 566 |
| bta-miR-2379 | -18.6 | 630 |
| bta-miR-2379 | -17.6 | 255 |
| bta-miR-2379 | -17.6 | 3   |
| bta-miR-2379 | -17.6 | 177 |
| bta-miR-2379 | -17.5 | 112 |
| bta-miR-2379 | -16.7 | 164 |
| bta-miR-2379 | -15.8 | 385 |
| bta-miR-2379 | -15.7 | 451 |
| bta-miR-2379 | -15.5 | 417 |
| bta-miR-2379 | -15.2 | 38  |
| bta-miR-2379 | -14.6 | 203 |
| bta-miR-2379 | -14.4 | 678 |
| bta-miR-2379 | -14.3 | 535 |

|               |       |     |
|---------------|-------|-----|
| bta-miR-2379  | -13.6 | 286 |
| bta-miR-2379  | -13.4 | 740 |
| bta-miR-2379  | -13.0 | 596 |
| bta-miR-2379  | -12.8 | 139 |
| bta-miR-2379  | -12.4 | 494 |
| bta-miR-2379  | -12.3 | 311 |
| bta-miR-2379  | -12.2 | 74  |
| bta-miR-2379  | -12.0 | 620 |
| bta-miR-2379  | -11.7 | 21  |
| bta-miR-2379  | -11.4 | 356 |
| bta-miR-2379  | -10.7 | 364 |
| bta-miR-2379  | -10.7 | 705 |
| bta-miR-2379  | -10.2 | 132 |
| bta-miR-2284c | -17.4 | 405 |
| bta-miR-2284c | -16.6 | 48  |
| bta-miR-2284c | -16.1 | 331 |
| bta-miR-2284c | -14.7 | 480 |
| bta-miR-2284c | -14.4 | 78  |
| bta-miR-2284c | -14.2 | 507 |
| bta-miR-2284c | -13.7 | 444 |
| bta-miR-2284c | -13.6 | 169 |
| bta-miR-2284c | -13.2 | 99  |
| bta-miR-2284c | -13.1 | 570 |
| bta-miR-2284c | -13.0 | 273 |
| bta-miR-2284c | -12.9 | 308 |
| bta-miR-2284c | -12.7 | 361 |
| bta-miR-2284c | -12.6 | 621 |
| bta-miR-2284c | -12.4 | 124 |
| bta-miR-2284c | -12.3 | 232 |
| bta-miR-2284c | -12.2 | 726 |
| bta-miR-2284c | -12.1 | 669 |
| bta-miR-2284c | -12.1 | 464 |
| bta-miR-2284c | -12.1 | 592 |
| bta-miR-2284c | -11.9 | 34  |
| bta-miR-2284c | -11.7 | 196 |
| bta-miR-2284c | -11.2 | 340 |
| bta-miR-2284c | -10.7 | 701 |
| bta-miR-2284c | -10.6 | 20  |
| bta-miR-2284c | -10.5 | 152 |
| bta-miR-2284c | -10.1 | 736 |
| bta-miR-2325b | -21.7 | 149 |
| bta-miR-2325b | -20.8 | 121 |
| bta-miR-2325b | -20.3 | 477 |
| bta-miR-2325b | -18.9 | 227 |
| bta-miR-2325b | -18.5 | 352 |
| bta-miR-2325b | -18.1 | 405 |
| bta-miR-2325b | -17.7 | 188 |
| bta-miR-2325b | -17.5 | 92  |
| bta-miR-2325b | -16.2 | 326 |
| bta-miR-2325b | -16.1 | 586 |
| bta-miR-2325b | -15.8 | 560 |
| bta-miR-2325b | -15.3 | 65  |
| bta-miR-2325b | -15.2 | 633 |
| bta-miR-2325b | -15.1 | 504 |
| bta-miR-2325b | -15.1 | 12  |
| bta-miR-2325b | -14.2 | 48  |
| bta-miR-2325b | -14.0 | 373 |
| bta-miR-2325b | -13.9 | 300 |
| bta-miR-2325b | -13.9 | 268 |

|               |       |     |
|---------------|-------|-----|
| bta-miR-2325b | -13.7 | 456 |
| bta-miR-2325b | -12.7 | 738 |
| bta-miR-2325b | -11.0 | 698 |
| bta-miR-2325b | -10.4 | 573 |
| bta-miR-2325b | -10.1 | 171 |
| bta-miR-2380  | -19.0 | 424 |
| bta-miR-2380  | -17.6 | 29  |
| bta-miR-2380  | -17.4 | 365 |
| bta-miR-2380  | -16.8 | 472 |
| bta-miR-2380  | -16.7 | 509 |
| bta-miR-2380  | -16.0 | 71  |
| bta-miR-2380  | -15.6 | 398 |
| bta-miR-2380  | -15.3 | 716 |
| bta-miR-2380  | -14.8 | 187 |
| bta-miR-2380  | -14.4 | 545 |
| bta-miR-2380  | -14.3 | 340 |
| bta-miR-2380  | -13.8 | 243 |
| bta-miR-2380  | -13.1 | 622 |
| bta-miR-2380  | -13.0 | 583 |
| bta-miR-2380  | -13.0 | 212 |
| bta-miR-2380  | -12.9 | 108 |
| bta-miR-2380  | -12.3 | 12  |
| bta-miR-2380  | -11.5 | 130 |
| bta-miR-2380  | -11.3 | 286 |
| bta-miR-2380  | -11.1 | 50  |
| bta-miR-2380  | -10.7 | 648 |
| bta-miR-2380  | -10.7 | 569 |
| bta-miR-2380  | -10.2 | 166 |
| bta-miR-2380  | -10.0 | 91  |
| bta-miR-2381  | -31.0 | 482 |
| bta-miR-2381  | -30.6 | 407 |
| bta-miR-2381  | -28.7 | 184 |
| bta-miR-2381  | -27.2 | 50  |
| bta-miR-2381  | -27.0 | 8   |
| bta-miR-2381  | -23.4 | 228 |
| bta-miR-2381  | -23.3 | 429 |
| bta-miR-2381  | -23.1 | 265 |
| bta-miR-2381  | -23.1 | 97  |
| bta-miR-2381  | -22.1 | 596 |
| bta-miR-2381  | -21.8 | 155 |
| bta-miR-2381  | -21.8 | 650 |
| bta-miR-2381  | -20.1 | 344 |
| bta-miR-2381  | -19.1 | 34  |
| bta-miR-2381  | -18.8 | 555 |
| bta-miR-2381  | -18.7 | 616 |
| bta-miR-2381  | -18.6 | 123 |
| bta-miR-2381  | -18.4 | 376 |
| bta-miR-2381  | -16.8 | 572 |
| bta-miR-2381  | -14.3 | 462 |
| bta-miR-2381  | -14.0 | 515 |
| bta-miR-2381  | -13.6 | 669 |
| bta-miR-2381  | -13.2 | 294 |
| bta-miR-2381  | -12.5 | 736 |
| bta-miR-2381  | -12.3 | 143 |
| bta-miR-2381  | -11.7 | 216 |
| bta-miR-2382  | -34.5 | 106 |
| bta-miR-2382  | -29.4 | 414 |
| bta-miR-2382  | -29.1 | 72  |
| bta-miR-2382  | -25.8 | 494 |

|               |       |     |
|---------------|-------|-----|
| bta-miR-2382  | -25.2 | 183 |
| bta-miR-2382  | -25.2 | 270 |
| bta-miR-2382  | -24.5 | 230 |
| bta-miR-2382  | -24.2 | 456 |
| bta-miR-2382  | -23.6 | 559 |
| bta-miR-2382  | -23.4 | 623 |
| bta-miR-2382  | -23.3 | 4   |
| bta-miR-2382  | -21.7 | 321 |
| bta-miR-2382  | -21.4 | 140 |
| bta-miR-2382  | -21.1 | 383 |
| bta-miR-2382  | -19.2 | 653 |
| bta-miR-2382  | -18.1 | 698 |
| bta-miR-2382  | -17.4 | 41  |
| bta-miR-2382  | -17.4 | 586 |
| bta-miR-2382  | -15.9 | 341 |
| bta-miR-2382  | -15.6 | 517 |
| bta-miR-2382  | -15.3 | 603 |
| bta-miR-2382  | -14.6 | 678 |
| bta-miR-2382  | -14.5 | 165 |
| bta-miR-2382  | -14.1 | 539 |
| bta-miR-2382  | -13.7 | 294 |
| bta-miR-2382  | -13.7 | 484 |
| bta-miR-2382  | -13.3 | 214 |
| bta-miR-2382  | -12.5 | 259 |
| bta-miR-2382  | -12.5 | 737 |
| bta-miR-2382  | -11.6 | 368 |
| bta-miR-2382  | -11.4 | 98  |
| bta-miR-2382  | -10.6 | 435 |
| bta-miR-2382* | -30.5 | 598 |
| bta-miR-2382* | -28.7 | 412 |
| bta-miR-2382* | -27.9 | 266 |
| bta-miR-2382* | -25.7 | 480 |
| bta-miR-2382* | -25.3 | 70  |
| bta-miR-2382* | -22.8 | 621 |
| bta-miR-2382* | -21.1 | 15  |
| bta-miR-2382* | -20.7 | 356 |
| bta-miR-2382* | -20.0 | 155 |
| bta-miR-2382* | -20.0 | 199 |
| bta-miR-2382* | -19.3 | 114 |
| bta-miR-2382* | -16.3 | 229 |
| bta-miR-2382* | -15.6 | 505 |
| bta-miR-2382* | -13.2 | 560 |
| bta-miR-2382* | -12.7 | 464 |
| bta-miR-2382* | -12.0 | 738 |
| bta-miR-2382* | -10.8 | 307 |
| bta-miR-2382* | -10.6 | 337 |
| bta-miR-2382* | -10.4 | 544 |
| bta-miR-2382* | -10.2 | 381 |
| bta-miR-2383  | -22.7 | 263 |
| bta-miR-2383  | -22.3 | 44  |
| bta-miR-2383  | -19.9 | 198 |
| bta-miR-2383  | -18.8 | 377 |
| bta-miR-2383  | -18.1 | 609 |
| bta-miR-2383  | -17.0 | 2   |
| bta-miR-2383  | -15.9 | 566 |
| bta-miR-2383  | -15.8 | 482 |
| bta-miR-2383  | -15.6 | 85  |
| bta-miR-2383  | -15.2 | 17  |
| bta-miR-2383  | -15.0 | 408 |

|                 |       |     |
|-----------------|-------|-----|
| bta-miR-2383    | -14.9 | 125 |
| bta-miR-2383    | -14.8 | 170 |
| bta-miR-2383    | -14.6 | 64  |
| bta-miR-2383    | -13.5 | 658 |
| bta-miR-2383    | -12.9 | 543 |
| bta-miR-2383    | -12.8 | 449 |
| bta-miR-2383    | -12.8 | 629 |
| bta-miR-2383    | -12.4 | 150 |
| bta-miR-2383    | -11.8 | 282 |
| bta-miR-2383    | -11.8 | 393 |
| bta-miR-2383    | -11.0 | 692 |
| bta-miR-2383    | -10.8 | 107 |
| bta-miR-2383    | -10.8 | 463 |
| bta-miR-2383    | -10.4 | 516 |
| bta-miR-2383    | -10.2 | 220 |
| bta-miR-2384    | -27.4 | 501 |
| bta-miR-2384    | -23.6 | 45  |
| bta-miR-2384    | -22.9 | 87  |
| bta-miR-2384    | -22.5 | 384 |
| bta-miR-2384    | -22.1 | 458 |
| bta-miR-2384    | -21.9 | 564 |
| bta-miR-2384    | -19.7 | 235 |
| bta-miR-2384    | -19.2 | 4   |
| bta-miR-2384    | -18.9 | 207 |
| bta-miR-2384    | -17.4 | 143 |
| bta-miR-2384    | -16.8 | 421 |
| bta-miR-2384    | -15.5 | 532 |
| bta-miR-2384    | -15.1 | 596 |
| bta-miR-2384    | -15.0 | 111 |
| bta-miR-2384    | -14.8 | 317 |
| bta-miR-2384    | -14.5 | 354 |
| bta-miR-2384    | -14.4 | 191 |
| bta-miR-2384    | -13.8 | 670 |
| bta-miR-2384    | -12.6 | 705 |
| bta-miR-2384    | -12.0 | 650 |
| bta-miR-2384    | -11.6 | 331 |
| bta-miR-2384    | -11.4 | 31  |
| bta-miR-2384    | -11.4 | 277 |
| bta-miR-2384    | -10.8 | 74  |
| bta-miR-2384    | -10.7 | 617 |
| bta-miR-2384    | -10.7 | 690 |
| bta-miR-2384    | -10.6 | 626 |
| bta-miR-2325c   | -22.3 | 443 |
| bta-miR-2325c   | -19.7 | 218 |
| bta-miR-2325c   | -16.5 | 101 |
| bta-miR-2325c   | -14.2 | 338 |
| bta-miR-2325c   | -14.0 | 609 |
| bta-miR-2325c   | -13.8 | 174 |
| bta-miR-2325c   | -13.6 | 196 |
| bta-miR-2325c   | -13.1 | 725 |
| bta-miR-2325c   | -11.6 | 557 |
| bta-miR-2325c   | -11.2 | 499 |
| bta-miR-2325c   | -10.4 | 239 |
| bta-miR-2325c   | -10.4 | 479 |
| bta-miR-2325c   | -10.2 | 114 |
| bta-miR-2325c   | -10.2 | 165 |
| bta-miR-2385-5p | -24.3 | 312 |
| bta-miR-2385-5p | -23.1 | 125 |
| bta-miR-2385-5p | -22.4 | 229 |

|                 |       |     |
|-----------------|-------|-----|
| bta-miR-2385-5p | -21.6 | 574 |
| bta-miR-2385-5p | -21.2 | 412 |
| bta-miR-2385-5p | -20.5 | 378 |
| bta-miR-2385-5p | -19.8 | 343 |
| bta-miR-2385-5p | -19.7 | 94  |
| bta-miR-2385-5p | -19.6 | 463 |
| bta-miR-2385-5p | -18.9 | 19  |
| bta-miR-2385-5p | -17.1 | 249 |
| bta-miR-2385-5p | -17.1 | 156 |
| bta-miR-2385-5p | -16.6 | 513 |
| bta-miR-2385-5p | -16.5 | 57  |
| bta-miR-2385-5p | -16.4 | 547 |
| bta-miR-2385-5p | -16.3 | 618 |
| bta-miR-2385-5p | -16.1 | 686 |
| bta-miR-2385-5p | -15.4 | 270 |
| bta-miR-2385-5p | -15.3 | 660 |
| bta-miR-2385-5p | -14.7 | 184 |
| bta-miR-2385-5p | -14.6 | 526 |
| bta-miR-2385-5p | -14.5 | 489 |
| bta-miR-2385-5p | -13.9 | 395 |
| bta-miR-2385-5p | -13.6 | 329 |
| bta-miR-2385-5p | -13.4 | 740 |
| bta-miR-2385-5p | -13.0 | 73  |
| bta-miR-2385-5p | -12.9 | 2   |
| bta-miR-2385-5p | -12.8 | 293 |
| bta-miR-2385-5p | -12.5 | 34  |
| bta-miR-2385-5p | -12.4 | 702 |
| bta-miR-2385-5p | -12.4 | 116 |
| bta-miR-2385-5p | -11.3 | 365 |
| bta-miR-2385-5p | -10.6 | 640 |
| bta-miR-2385-5p | -10.3 | 51  |
| bta-miR-2385-5p | -10.1 | 146 |
| bta-miR-2385-5p | -10.1 | 483 |
| bta-miR-2385-3p | -27.0 | 606 |
| bta-miR-2385-3p | -25.9 | 437 |
| bta-miR-2385-3p | -23.1 | 415 |
| bta-miR-2385-3p | -22.5 | 350 |
| bta-miR-2385-3p | -22.4 | 6   |
| bta-miR-2385-3p | -20.6 | 61  |
| bta-miR-2385-3p | -19.4 | 585 |
| bta-miR-2385-3p | -18.2 | 493 |
| bta-miR-2385-3p | -17.3 | 369 |
| bta-miR-2385-3p | -17.0 | 630 |
| bta-miR-2385-3p | -16.5 | 265 |
| bta-miR-2385-3p | -16.0 | 216 |
| bta-miR-2385-3p | -15.7 | 116 |
| bta-miR-2385-3p | -15.5 | 156 |
| bta-miR-2385-3p | -15.4 | 185 |
| bta-miR-2385-3p | -14.6 | 737 |
| bta-miR-2385-3p | -14.5 | 477 |
| bta-miR-2385-3p | -13.5 | 535 |
| bta-miR-2385-3p | -13.4 | 560 |
| bta-miR-2385-3p | -12.2 | 649 |
| bta-miR-2385-3p | -11.7 | 27  |
| bta-miR-2385-3p | -10.9 | 403 |
| bta-miR-2385-3p | -10.2 | 92  |
| bta-miR-2284v   | -20.4 | 261 |
| bta-miR-2284v   | -18.8 | 166 |
| bta-miR-2284v   | -18.6 | 327 |

|               |       |     |
|---------------|-------|-----|
| bta-miR-2284v | -17.4 | 108 |
| bta-miR-2284v | -17.4 | 28  |
| bta-miR-2284v | -17.2 | 358 |
| bta-miR-2284v | -16.5 | 49  |
| bta-miR-2284v | -16.0 | 508 |
| bta-miR-2284v | -16.0 | 232 |
| bta-miR-2284v | -16.0 | 406 |
| bta-miR-2284v | -15.7 | 471 |
| bta-miR-2284v | -15.7 | 188 |
| bta-miR-2284v | -15.6 | 622 |
| bta-miR-2284v | -15.1 | 273 |
| bta-miR-2284v | -15.1 | 308 |
| bta-miR-2284v | -14.8 | 141 |
| bta-miR-2284v | -14.8 | 119 |
| bta-miR-2284v | -14.8 | 429 |
| bta-miR-2284v | -13.8 | 94  |
| bta-miR-2284v | -13.8 | 486 |
| bta-miR-2284v | -13.4 | 134 |
| bta-miR-2284v | -13.3 | 320 |
| bta-miR-2284v | -13.3 | 715 |
| bta-miR-2284v | -13.1 | 689 |
| bta-miR-2284v | -12.9 | 595 |
| bta-miR-2284v | -12.7 | 246 |
| bta-miR-2284v | -12.7 | 80  |
| bta-miR-2284v | -12.5 | 451 |
| bta-miR-2284v | -11.9 | 210 |
| bta-miR-2284v | -11.7 | 558 |
| bta-miR-2284v | -11.4 | 7   |
| bta-miR-2284v | -11.3 | 579 |
| bta-miR-2284v | -11.1 | 342 |
| bta-miR-2284v | -10.9 | 650 |
| bta-miR-2284v | -10.2 | 669 |
| bta-miR-2386  | -18.5 | 470 |
| bta-miR-2386  | -17.9 | 114 |
| bta-miR-2386  | -16.5 | 220 |
| bta-miR-2386  | -15.8 | 350 |
| bta-miR-2386  | -15.7 | 614 |
| bta-miR-2386  | -15.3 | 443 |
| bta-miR-2386  | -14.6 | 589 |
| bta-miR-2386  | -14.3 | 177 |
| bta-miR-2386  | -14.2 | 405 |
| bta-miR-2386  | -14.1 | 333 |
| bta-miR-2386  | -13.4 | 499 |
| bta-miR-2386  | -13.4 | 565 |
| bta-miR-2386  | -13.3 | 726 |
| bta-miR-2386  | -12.8 | 41  |
| bta-miR-2386  | -12.5 | 265 |
| bta-miR-2386  | -11.9 | 102 |
| bta-miR-2386  | -11.8 | 661 |
| bta-miR-2386  | -11.2 | 16  |
| bta-miR-2386  | -11.2 | 155 |
| bta-miR-2386  | -11.1 | 312 |
| bta-miR-2386  | -11.0 | 415 |
| bta-miR-2386  | -10.4 | 79  |
| bta-miR-2387  | -30.6 | 415 |
| bta-miR-2387  | -29.4 | 116 |
| bta-miR-2387  | -26.6 | 66  |
| bta-miR-2387  | -26.5 | 560 |
| bta-miR-2387  | -26.4 | 465 |



|               |       |     |
|---------------|-------|-----|
| bta-miR-2387  | -25.2 | 266 |
| bta-miR-2387  | -24.7 | 654 |
| bta-miR-2387  | -24.0 | 488 |
| bta-miR-2387  | -23.6 | 4   |
| bta-miR-2387  | -22.1 | 41  |
| bta-miR-2387  | -21.9 | 185 |
| bta-miR-2387  | -20.4 | 617 |
| bta-miR-2387  | -19.8 | 387 |
| bta-miR-2387  | -19.6 | 586 |
| bta-miR-2387  | -19.0 | 231 |
| bta-miR-2387  | -18.1 | 436 |
| bta-miR-2387  | -17.5 | 156 |
| bta-miR-2387  | -17.2 | 308 |
| bta-miR-2387  | -16.8 | 685 |
| bta-miR-2387  | -16.6 | 352 |
| bta-miR-2387  | -15.2 | 96  |
| bta-miR-2387  | -14.8 | 606 |
| bta-miR-2387  | -14.6 | 25  |
| bta-miR-2387  | -13.9 | 734 |
| bta-miR-2387  | -13.3 | 520 |
| bta-miR-2387  | -11.6 | 548 |
| bta-miR-2387  | -10.5 | 325 |
| bta-miR-2387  | -10.5 | 212 |
| bta-miR-2388* | -36.1 | 605 |
| bta-miR-2388* | -29.9 | 435 |
| bta-miR-2388* | -26.7 | 60  |
| bta-miR-2388* | -26.4 | 205 |
| bta-miR-2388* | -25.5 | 407 |
| bta-miR-2388* | -24.5 | 487 |
| bta-miR-2388* | -24.1 | 263 |
| bta-miR-2388* | -23.6 | 165 |
| bta-miR-2388* | -21.0 | 9   |
| bta-miR-2388* | -19.9 | 582 |
| bta-miR-2388* | -19.1 | 463 |
| bta-miR-2388* | -18.9 | 344 |
| bta-miR-2388* | -18.0 | 100 |
| bta-miR-2388* | -15.5 | 653 |
| bta-miR-2388* | -15.4 | 737 |
| bta-miR-2388* | -14.9 | 630 |
| bta-miR-2388* | -13.5 | 361 |
| bta-miR-2388* | -11.7 | 238 |
| bta-miR-2388* | -11.6 | 147 |
| bta-miR-2388* | -11.5 | 516 |
| bta-miR-2388* | -11.2 | 559 |
| bta-miR-2388* | -10.3 | 194 |
| bta-miR-2388* | -10.0 | 37  |
| bta-miR-2388  | -24.1 | 384 |
| bta-miR-2388  | -22.9 | 489 |
| bta-miR-2388  | -22.8 | 95  |
| bta-miR-2388  | -22.5 | 461 |
| bta-miR-2388  | -22.3 | 181 |
| bta-miR-2388  | -21.7 | 577 |
| bta-miR-2388  | -20.7 | 513 |
| bta-miR-2388  | -20.4 | 161 |
| bta-miR-2388  | -19.8 | 53  |
| bta-miR-2388  | -19.6 | 276 |
| bta-miR-2388  | -19.3 | 2   |
| bta-miR-2388  | -17.8 | 207 |
| bta-miR-2388  | -17.8 | 623 |

|              |       |     |
|--------------|-------|-----|
| bta-miR-2388 | -17.6 | 296 |
| bta-miR-2388 | -16.5 | 422 |
| bta-miR-2388 | -16.0 | 692 |
| bta-miR-2388 | -15.9 | 258 |
| bta-miR-2388 | -15.8 | 137 |
| bta-miR-2388 | -15.6 | 639 |
| bta-miR-2388 | -15.5 | 537 |
| bta-miR-2388 | -14.6 | 342 |
| bta-miR-2388 | -14.6 | 123 |
| bta-miR-2388 | -13.2 | 363 |
| bta-miR-2388 | -12.5 | 664 |
| bta-miR-2388 | -12.2 | 565 |
| bta-miR-2388 | -12.1 | 316 |
| bta-miR-2388 | -11.1 | 34  |
| bta-miR-2388 | -10.8 | 455 |
| bta-miR-2388 | -10.6 | 740 |
| bta-miR-2388 | -10.2 | 248 |
| bta-miR-2389 | -30.4 | 127 |
| bta-miR-2389 | -29.4 | 231 |
| bta-miR-2389 | -29.0 | 186 |
| bta-miR-2389 | -26.8 | 567 |
| bta-miR-2389 | -26.4 | 461 |
| bta-miR-2389 | -24.2 | 386 |
| bta-miR-2389 | -23.9 | 623 |
| bta-miR-2389 | -23.5 | 352 |
| bta-miR-2389 | -22.8 | 317 |
| bta-miR-2389 | -22.8 | 9   |
| bta-miR-2389 | -22.4 | 85  |
| bta-miR-2389 | -21.4 | 426 |
| bta-miR-2389 | -21.1 | 498 |
| bta-miR-2389 | -19.4 | 152 |
| bta-miR-2389 | -18.8 | 275 |
| bta-miR-2389 | -18.4 | 587 |
| bta-miR-2389 | -18.2 | 107 |
| bta-miR-2389 | -16.6 | 699 |
| bta-miR-2389 | -16.3 | 39  |
| bta-miR-2389 | -15.3 | 259 |
| bta-miR-2389 | -14.7 | 738 |
| bta-miR-2389 | -14.1 | 365 |
| bta-miR-2389 | -13.8 | 72  |
| bta-miR-2389 | -13.7 | 521 |
| bta-miR-2389 | -13.7 | 677 |
| bta-miR-2389 | -13.5 | 403 |
| bta-miR-2389 | -12.6 | 342 |
| bta-miR-2389 | -12.1 | 215 |
| bta-miR-2389 | -11.9 | 289 |
| bta-miR-2389 | -11.8 | 657 |
| bta-miR-2389 | -10.9 | 478 |
| bta-miR-2389 | -10.2 | 173 |
| bta-miR-2390 | -17.6 | 102 |
| bta-miR-2390 | -16.7 | 592 |
| bta-miR-2390 | -16.6 | 371 |
| bta-miR-2390 | -16.2 | 153 |
| bta-miR-2390 | -15.6 | 177 |
| bta-miR-2390 | -15.6 | 731 |
| bta-miR-2390 | -15.1 | 405 |
| bta-miR-2390 | -14.8 | 41  |
| bta-miR-2390 | -14.7 | 479 |
| bta-miR-2390 | -13.7 | 338 |

|              |       |     |
|--------------|-------|-----|
| bta-miR-2390 | -13.1 | 220 |
| bta-miR-2390 | -12.8 | 69  |
| bta-miR-2390 | -12.6 | 16  |
| bta-miR-2390 | -12.5 | 499 |
| bta-miR-2390 | -12.3 | 268 |
| bta-miR-2390 | -11.8 | 443 |
| bta-miR-2390 | -11.8 | 609 |
| bta-miR-2390 | -10.0 | 631 |
| bta-miR-2391 | -21.6 | 448 |
| bta-miR-2391 | -21.6 | 614 |
| bta-miR-2391 | -17.4 | 268 |
| bta-miR-2391 | -16.4 | 69  |
| bta-miR-2391 | -14.7 | 479 |
| bta-miR-2391 | -14.3 | 418 |
| bta-miR-2391 | -13.9 | 630 |
| bta-miR-2391 | -13.0 | 12  |
| bta-miR-2391 | -12.1 | 598 |
| bta-miR-2391 | -11.2 | 232 |
| bta-miR-2391 | -11.1 | 176 |
| bta-miR-2391 | -10.8 | 499 |
| bta-miR-2391 | -10.4 | 220 |
| bta-miR-2392 | -35.2 | 319 |
| bta-miR-2392 | -33.4 | 126 |
| bta-miR-2392 | -27.0 | 244 |
| bta-miR-2392 | -26.3 | 86  |
| bta-miR-2392 | -26.1 | 21  |
| bta-miR-2392 | -25.0 | 464 |
| bta-miR-2392 | -24.8 | 185 |
| bta-miR-2392 | -24.6 | 560 |
| bta-miR-2392 | -24.0 | 359 |
| bta-miR-2392 | -21.8 | 161 |
| bta-miR-2392 | -21.2 | 51  |
| bta-miR-2392 | -21.0 | 422 |
| bta-miR-2392 | -20.3 | 498 |
| bta-miR-2392 | -18.0 | 396 |
| bta-miR-2392 | -17.9 | 686 |
| bta-miR-2392 | -17.6 | 271 |
| bta-miR-2392 | -16.4 | 622 |
| bta-miR-2392 | -15.8 | 654 |
| bta-miR-2392 | -14.6 | 526 |
| bta-miR-2392 | -14.4 | 305 |
| bta-miR-2392 | -11.8 | 5   |
| bta-miR-2392 | -11.3 | 235 |
| bta-miR-2392 | -11.1 | 740 |
| bta-miR-2392 | -10.9 | 488 |
| bta-miR-2392 | -10.6 | 342 |
| bta-miR-2392 | -10.6 | 594 |
| bta-miR-2392 | -10.6 | 709 |
| bta-miR-2392 | -10.2 | 70  |
| bta-miR-2392 | -10.0 | 518 |
| bta-miR-2393 | -17.7 | 439 |
| bta-miR-2393 | -16.0 | 221 |
| bta-miR-2393 | -14.0 | 610 |
| bta-miR-2393 | -13.3 | 196 |
| bta-miR-2393 | -13.2 | 101 |
| bta-miR-2393 | -11.9 | 479 |
| bta-miR-2393 | -11.8 | 598 |
| bta-miR-2393 | -11.4 | 153 |
| bta-miR-2393 | -10.8 | 68  |

|              |       |     |
|--------------|-------|-----|
| bta-miR-2393 | -10.7 | 239 |
| bta-miR-2393 | -10.6 | 366 |
| bta-miR-2393 | -10.4 | 725 |
| bta-miR-2393 | -10.2 | 557 |
| bta-miR-2393 | -10.2 | 348 |
| bta-miR-2394 | -31.6 | 435 |
| bta-miR-2394 | -22.8 | 191 |
| bta-miR-2394 | -22.7 | 609 |
| bta-miR-2394 | -21.9 | 234 |
| bta-miR-2394 | -19.9 | 580 |
| bta-miR-2394 | -19.0 | 59  |
| bta-miR-2394 | -18.4 | 401 |
| bta-miR-2394 | -17.9 | 89  |
| bta-miR-2394 | -16.9 | 464 |
| bta-miR-2394 | -15.7 | 345 |
| bta-miR-2394 | -15.6 | 166 |
| bta-miR-2394 | -15.6 | 626 |
| bta-miR-2394 | -15.1 | 502 |
| bta-miR-2394 | -14.5 | 8   |
| bta-miR-2394 | -14.4 | 108 |
| bta-miR-2394 | -13.0 | 81  |
| bta-miR-2394 | -11.5 | 645 |
| bta-miR-2394 | -11.4 | 539 |
| bta-miR-2394 | -10.1 | 566 |
| bta-miR-2395 | -24.7 | 448 |
| bta-miR-2395 | -23.7 | 344 |
| bta-miR-2395 | -23.1 | 60  |
| bta-miR-2395 | -22.6 | 114 |
| bta-miR-2395 | -22.3 | 416 |
| bta-miR-2395 | -22.3 | 551 |
| bta-miR-2395 | -21.8 | 174 |
| bta-miR-2395 | -21.6 | 235 |
| bta-miR-2395 | -21.3 | 476 |
| bta-miR-2395 | -21.1 | 14  |
| bta-miR-2395 | -19.9 | 83  |
| bta-miR-2395 | -18.9 | 215 |
| bta-miR-2395 | -18.8 | 566 |
| bta-miR-2395 | -18.5 | 437 |
| bta-miR-2395 | -18.4 | 657 |
| bta-miR-2395 | -18.0 | 613 |
| bta-miR-2395 | -16.1 | 202 |
| bta-miR-2395 | -16.1 | 737 |
| bta-miR-2395 | -15.3 | 267 |
| bta-miR-2395 | -14.9 | 395 |
| bta-miR-2395 | -14.7 | 684 |
| bta-miR-2395 | -14.6 | 502 |
| bta-miR-2395 | -14.3 | 631 |
| bta-miR-2395 | -14.0 | 37  |
| bta-miR-2395 | -14.0 | 156 |
| bta-miR-2395 | -13.7 | 1   |
| bta-miR-2395 | -12.3 | 126 |
| bta-miR-2395 | -11.1 | 291 |
| bta-miR-2395 | -10.2 | 465 |
| bta-miR-2395 | -10.0 | 164 |
| bta-miR-2396 | -26.2 | 564 |
| bta-miR-2396 | -23.8 | 342 |
| bta-miR-2396 | -23.4 | 6   |
| bta-miR-2396 | -22.3 | 504 |
| bta-miR-2396 | -21.9 | 237 |

|               |       |     |
|---------------|-------|-----|
| bta-miR-2396  | -21.6 | 618 |
| bta-miR-2396  | -21.3 | 143 |
| bta-miR-2396  | -20.9 | 52  |
| bta-miR-2396  | -19.4 | 28  |
| bta-miR-2396  | -19.1 | 99  |
| bta-miR-2396  | -19.1 | 401 |
| bta-miR-2396  | -18.8 | 474 |
| bta-miR-2396  | -18.6 | 368 |
| bta-miR-2396  | -18.4 | 261 |
| bta-miR-2396  | -18.3 | 120 |
| bta-miR-2396  | -18.2 | 597 |
| bta-miR-2396  | -17.5 | 188 |
| bta-miR-2396  | -17.0 | 322 |
| bta-miR-2396  | -15.1 | 422 |
| bta-miR-2396  | -15.1 | 297 |
| bta-miR-2396  | -15.1 | 736 |
| bta-miR-2396  | -14.8 | 458 |
| bta-miR-2396  | -14.7 | 384 |
| bta-miR-2396  | -14.5 | 645 |
| bta-miR-2396  | -14.5 | 277 |
| bta-miR-2396  | -13.7 | 705 |
| bta-miR-2396  | -13.0 | 204 |
| bta-miR-2396  | -12.4 | 521 |
| bta-miR-2396  | -12.1 | 535 |
| bta-miR-2396  | -10.8 | 670 |
| bta-miR-2396  | -10.7 | 690 |
| bta-miR-2396  | -10.5 | 87  |
| bta-miR-2285c | -17.2 | 51  |
| bta-miR-2285c | -17.0 | 408 |
| bta-miR-2285c | -16.2 | 237 |
| bta-miR-2285c | -15.4 | 429 |
| bta-miR-2285c | -15.4 | 606 |
| bta-miR-2285c | -14.7 | 8   |
| bta-miR-2285c | -14.1 | 483 |
| bta-miR-2285c | -13.9 | 30  |
| bta-miR-2285c | -13.3 | 645 |
| bta-miR-2285c | -12.8 | 200 |
| bta-miR-2285c | -12.5 | 169 |
| bta-miR-2285c | -12.4 | 331 |
| bta-miR-2285c | -12.4 | 277 |
| bta-miR-2285c | -12.4 | 563 |
| bta-miR-2285c | -12.4 | 515 |
| bta-miR-2285c | -12.1 | 283 |
| bta-miR-2285c | -12.0 | 452 |
| bta-miR-2285c | -11.9 | 73  |
| bta-miR-2285c | -11.6 | 126 |
| bta-miR-2285c | -11.5 | 99  |
| bta-miR-2285c | -11.4 | 669 |
| bta-miR-2285c | -10.8 | 468 |
| bta-miR-2285c | -10.7 | 544 |
| bta-miR-2285c | -10.5 | 354 |
| bta-miR-2285c | -10.5 | 628 |
| bta-miR-2285c | -10.1 | 374 |
| bta-miR-2397* | -29.2 | 602 |
| bta-miR-2397* | -25.0 | 478 |
| bta-miR-2397* | -24.2 | 408 |
| bta-miR-2397* | -22.3 | 10  |
| bta-miR-2397* | -21.4 | 69  |
| bta-miR-2397* | -19.1 | 263 |

|               |       |     |
|---------------|-------|-----|
| bta-miR-2397* | -18.3 | 165 |
| bta-miR-2397* | -18.0 | 358 |
| bta-miR-2397* | -17.4 | 437 |
| bta-miR-2397* | -16.9 | 575 |
| bta-miR-2397* | -16.7 | 122 |
| bta-miR-2397* | -16.4 | 654 |
| bta-miR-2397* | -16.0 | 219 |
| bta-miR-2397* | -15.6 | 30  |
| bta-miR-2397* | -14.8 | 106 |
| bta-miR-2397* | -13.8 | 515 |
| bta-miR-2397* | -13.8 | 154 |
| bta-miR-2397* | -12.4 | 189 |
| bta-miR-2397* | -12.4 | 544 |
| bta-miR-2397* | -11.6 | 628 |
| bta-miR-2397* | -10.9 | 115 |
| bta-miR-2397* | -10.8 | 739 |
| bta-miR-2397* | -10.5 | 304 |
| bta-miR-2397* | -10.3 | 342 |
| bta-miR-2397  | -27.8 | 544 |
| bta-miR-2397  | -24.7 | 493 |
| bta-miR-2397  | -22.0 | 659 |
| bta-miR-2397  | -20.9 | 359 |
| bta-miR-2397  | -20.6 | 412 |
| bta-miR-2397  | -18.9 | 42  |
| bta-miR-2397  | -18.5 | 694 |
| bta-miR-2397  | -18.2 | 578 |
| bta-miR-2397  | -18.0 | 73  |
| bta-miR-2397  | -17.9 | 473 |
| bta-miR-2397  | -17.8 | 109 |
| bta-miR-2397  | -16.9 | 618 |
| bta-miR-2397  | -16.7 | 525 |
| bta-miR-2397  | -16.4 | 244 |
| bta-miR-2397  | -16.2 | 172 |
| bta-miR-2397  | -15.9 | 15  |
| bta-miR-2397  | -15.2 | 119 |
| bta-miR-2397  | -14.9 | 449 |
| bta-miR-2397  | -14.7 | 283 |
| bta-miR-2397  | -13.5 | 199 |
| bta-miR-2397  | -13.3 | 266 |
| bta-miR-2397  | -13.0 | 306 |
| bta-miR-2397  | -12.3 | 744 |
| bta-miR-2397  | -12.3 | 132 |
| bta-miR-2397  | -12.1 | 2   |
| bta-miR-2397  | -11.6 | 395 |
| bta-miR-2397  | -11.0 | 337 |
| bta-miR-2397  | -10.8 | 643 |
| bta-miR-2398  | -22.7 | 585 |
| bta-miR-2398  | -22.1 | 411 |
| bta-miR-2398  | -22.0 | 80  |
| bta-miR-2398  | -21.0 | 614 |
| bta-miR-2398  | -20.8 | 185 |
| bta-miR-2398  | -20.7 | 244 |
| bta-miR-2398  | -19.6 | 492 |
| bta-miR-2398  | -19.4 | 360 |
| bta-miR-2398  | -19.0 | 560 |
| bta-miR-2398  | -18.6 | 126 |
| bta-miR-2398  | -18.5 | 464 |
| bta-miR-2398  | -18.3 | 13  |
| bta-miR-2398  | -18.2 | 307 |

|               |       |     |
|---------------|-------|-----|
| bta-miR-2398  | -17.9 | 376 |
| bta-miR-2398  | -17.4 | 199 |
| bta-miR-2398  | -17.1 | 225 |
| bta-miR-2398  | -16.3 | 167 |
| bta-miR-2398  | -15.7 | 37  |
| bta-miR-2398  | -15.0 | 696 |
| bta-miR-2398  | -14.4 | 519 |
| bta-miR-2398  | -14.1 | 657 |
| bta-miR-2398  | -14.0 | 742 |
| bta-miR-2398  | -13.7 | 537 |
| bta-miR-2398  | -13.5 | 435 |
| bta-miR-2398  | -12.9 | 337 |
| bta-miR-2398  | -12.8 | 483 |
| bta-miR-2398  | -12.2 | 118 |
| bta-miR-2398  | -11.9 | 2   |
| bta-miR-2398  | -11.8 | 271 |
| bta-miR-2398  | -11.8 | 156 |
| bta-miR-2398  | -11.7 | 66  |
| bta-miR-2398  | -11.0 | 136 |
| bta-miR-2398  | -10.9 | 324 |
| bta-miR-2398  | -10.8 | 30  |
| bta-miR-2399  | -21.5 | 464 |
| bta-miR-2399  | -21.1 | 169 |
| bta-miR-2399  | -19.1 | 40  |
| bta-miR-2399  | -17.6 | 596 |
| bta-miR-2399  | -17.4 | 435 |
| bta-miR-2399  | -17.1 | 259 |
| bta-miR-2399  | -16.9 | 98  |
| bta-miR-2399  | -16.6 | 551 |
| bta-miR-2399  | -16.5 | 331 |
| bta-miR-2399  | -16.1 | 209 |
| bta-miR-2399  | -16.0 | 409 |
| bta-miR-2399  | -16.0 | 484 |
| bta-miR-2399  | -15.1 | 229 |
| bta-miR-2399  | -14.7 | 120 |
| bta-miR-2399  | -14.0 | 146 |
| bta-miR-2399  | -13.4 | 617 |
| bta-miR-2399  | -13.4 | 513 |
| bta-miR-2399  | -13.2 | 5   |
| bta-miR-2399  | -12.9 | 576 |
| bta-miR-2399  | -12.7 | 740 |
| bta-miR-2399  | -12.3 | 354 |
| bta-miR-2399  | -12.2 | 691 |
| bta-miR-2399  | -11.7 | 389 |
| bta-miR-2399  | -11.7 | 456 |
| bta-miR-2399  | -11.6 | 75  |
| bta-miR-2399  | -11.3 | 500 |
| bta-miR-2399  | -11.2 | 662 |
| bta-miR-2399  | -10.4 | 20  |
| bta-miR-2399  | -10.2 | 316 |
| bta-miR-2399  | -10.2 | 646 |
| bta-miR-2399* | -18.9 | 56  |
| bta-miR-2399* | -17.9 | 425 |
| bta-miR-2399* | -17.0 | 520 |
| bta-miR-2399* | -16.5 | 488 |
| bta-miR-2399* | -16.0 | 540 |
| bta-miR-2399* | -15.2 | 206 |
| bta-miR-2399* | -15.2 | 654 |
| bta-miR-2399* | -14.1 | 381 |

|               |       |     |
|---------------|-------|-----|
| bta-miR-2399* | -14.0 | 73  |
| bta-miR-2399* | -13.6 | 560 |
| bta-miR-2399* | -13.0 | 1   |
| bta-miR-2399* | -12.3 | 618 |
| bta-miR-2399* | -11.2 | 636 |
| bta-miR-2399* | -10.5 | 447 |
| bta-miR-2399* | -10.3 | 476 |
| bta-miR-2399* | -10.2 | 263 |
| bta-miR-2399* | -10.2 | 683 |
| bta-miR-2399* | -10.1 | 37  |
| bta-miR-2399* | -10.0 | 412 |
| bta-miR-2400  | -29.8 | 410 |
| bta-miR-2400  | -29.3 | 566 |
| bta-miR-2400  | -27.9 | 107 |
| bta-miR-2400  | -26.4 | 4   |
| bta-miR-2400  | -24.5 | 80  |
| bta-miR-2400  | -23.9 | 344 |
| bta-miR-2400  | -22.8 | 234 |
| bta-miR-2400  | -21.9 | 461 |
| bta-miR-2400  | -21.8 | 539 |
| bta-miR-2400  | -20.9 | 617 |
| bta-miR-2400  | -20.2 | 495 |
| bta-miR-2400  | -19.8 | 165 |
| bta-miR-2400  | -19.1 | 37  |
| bta-miR-2400  | -18.5 | 200 |
| bta-miR-2400  | -17.6 | 393 |
| bta-miR-2400  | -17.4 | 737 |
| bta-miR-2400  | -17.2 | 596 |
| bta-miR-2400  | -17.0 | 277 |
| bta-miR-2400  | -17.0 | 650 |
| bta-miR-2400  | -15.8 | 434 |
| bta-miR-2400  | -15.3 | 263 |
| bta-miR-2400  | -13.5 | 692 |
| bta-miR-2400  | -13.1 | 299 |
| bta-miR-2400  | -13.0 | 664 |
| bta-miR-2400  | -12.8 | 128 |
| bta-miR-2400  | -12.7 | 378 |
| bta-miR-2400  | -12.6 | 25  |
| bta-miR-2400  | -12.4 | 482 |
| bta-miR-2400  | -12.0 | 455 |
| bta-miR-2400  | -11.5 | 522 |
| bta-miR-2400  | -11.2 | 71  |
| bta-miR-2400  | -10.7 | 635 |
| bta-miR-2400  | -10.1 | 218 |
| bta-miR-2284q | -21.4 | 403 |
| bta-miR-2284q | -20.1 | 60  |
| bta-miR-2284q | -19.2 | 461 |
| bta-miR-2284q | -18.1 | 14  |
| bta-miR-2284q | -16.9 | 173 |
| bta-miR-2284q | -16.7 | 596 |
| bta-miR-2284q | -16.6 | 98  |
| bta-miR-2284q | -16.3 | 611 |
| bta-miR-2284q | -15.3 | 342 |
| bta-miR-2284q | -15.0 | 692 |
| bta-miR-2284q | -14.9 | 215 |
| bta-miR-2284q | -14.6 | 364 |
| bta-miR-2284q | -14.0 | 564 |
| bta-miR-2284q | -13.8 | 730 |
| bta-miR-2284q | -13.6 | 267 |



|               |       |     |
|---------------|-------|-----|
| bta-miR-2284q | -13.4 | 451 |
| bta-miR-2284q | -13.2 | 628 |
| bta-miR-2284q | -13.0 | 491 |
| bta-miR-2284q | -12.8 | 140 |
| bta-miR-2284q | -12.0 | 657 |
| bta-miR-2284q | -11.9 | 309 |
| bta-miR-2284q | -11.6 | 514 |
| bta-miR-2284q | -10.9 | 39  |
| bta-miR-2284q | -10.7 | 242 |
| bta-miR-2401  | -32.4 | 107 |
| bta-miR-2401  | -25.5 | 472 |
| bta-miR-2401  | -23.5 | 361 |
| bta-miR-2401  | -22.7 | 165 |
| bta-miR-2401  | -22.4 | 429 |
| bta-miR-2401  | -21.9 | 407 |
| bta-miR-2401  | -21.2 | 563 |
| bta-miR-2401  | -19.9 | 623 |
| bta-miR-2401  | -19.9 | 258 |
| bta-miR-2401  | -19.3 | 29  |
| bta-miR-2401  | -18.8 | 64  |
| bta-miR-2401  | -17.9 | 596 |
| bta-miR-2401  | -17.9 | 234 |
| bta-miR-2401  | -17.4 | 141 |
| bta-miR-2401  | -17.0 | 344 |
| bta-miR-2401  | -16.7 | 198 |
| bta-miR-2401  | -16.5 | 4   |
| bta-miR-2401  | -16.2 | 495 |
| bta-miR-2401  | -15.4 | 737 |
| bta-miR-2401  | -14.5 | 389 |
| bta-miR-2401  | -13.6 | 89  |
| bta-miR-2401  | -13.1 | 580 |
| bta-miR-2401  | -12.3 | 97  |
| bta-miR-2401  | -10.9 | 308 |
| bta-miR-2401  | -10.8 | 698 |
| bta-miR-2401  | -10.4 | 610 |
| bta-miR-2401  | -10.3 | 663 |
| bta-miR-2402  | -27.3 | 605 |
| bta-miR-2402  | -25.9 | 13  |
| bta-miR-2402  | -23.2 | 420 |
| bta-miR-2402  | -21.8 | 61  |
| bta-miR-2402  | -20.7 | 185 |
| bta-miR-2402  | -19.9 | 477 |
| bta-miR-2402  | -19.0 | 369 |
| bta-miR-2402  | -17.3 | 266 |
| bta-miR-2402  | -17.1 | 403 |
| bta-miR-2402  | -16.5 | 623 |
| bta-miR-2402  | -15.6 | 582 |
| bta-miR-2402  | -15.5 | 560 |
| bta-miR-2402  | -15.2 | 216 |
| bta-miR-2402  | -14.8 | 644 |
| bta-miR-2402  | -13.9 | 86  |
| bta-miR-2402  | -13.8 | 156 |
| bta-miR-2402  | -12.9 | 116 |
| bta-miR-2402  | -12.4 | 730 |
| bta-miR-2402  | -12.0 | 352 |
| bta-miR-2402  | -11.2 | 519 |
| bta-miR-2403  | -27.9 | 70  |
| bta-miR-2403  | -27.4 | 408 |
| bta-miR-2403  | -25.6 | 480 |

|              |       |     |
|--------------|-------|-----|
| bta-miR-2403 | -24.1 | 574 |
| bta-miR-2403 | -23.7 | 615 |
| bta-miR-2403 | -22.8 | 16  |
| bta-miR-2403 | -22.6 | 166 |
| bta-miR-2403 | -22.5 | 114 |
| bta-miR-2403 | -22.0 | 268 |
| bta-miR-2403 | -21.0 | 447 |
| bta-miR-2403 | -20.7 | 233 |
| bta-miR-2403 | -20.1 | 392 |
| bta-miR-2403 | -17.9 | 515 |
| bta-miR-2403 | -17.6 | 544 |
| bta-miR-2403 | -16.0 | 348 |
| bta-miR-2403 | -15.9 | 205 |
| bta-miR-2403 | -15.0 | 51  |
| bta-miR-2403 | -14.8 | 698 |
| bta-miR-2403 | -14.8 | 736 |
| bta-miR-2403 | -14.8 | 654 |
| bta-miR-2403 | -14.2 | 37  |
| bta-miR-2403 | -13.9 | 153 |
| bta-miR-2403 | -13.6 | 308 |
| bta-miR-2403 | -12.9 | 249 |
| bta-miR-2403 | -12.8 | 97  |
| bta-miR-2403 | -12.8 | 371 |
| bta-miR-2403 | -12.0 | 632 |
| bta-miR-2403 | -11.7 | 604 |
| bta-miR-2403 | -11.5 | 468 |
| bta-miR-2403 | -11.0 | 140 |
| bta-miR-2403 | -10.5 | 8   |
| bta-miR-2403 | -10.0 | 324 |
| bta-miR-2403 | -10.0 | 330 |
| bta-miR-2404 | -22.8 | 479 |
| bta-miR-2404 | -22.2 | 586 |
| bta-miR-2404 | -20.1 | 506 |
| bta-miR-2404 | -19.5 | 349 |
| bta-miR-2404 | -19.2 | 10  |
| bta-miR-2404 | -19.0 | 66  |
| bta-miR-2404 | -17.0 | 618 |
| bta-miR-2404 | -16.9 | 405 |
| bta-miR-2404 | -16.8 | 185 |
| bta-miR-2404 | -15.6 | 649 |
| bta-miR-2404 | -15.5 | 238 |
| bta-miR-2404 | -15.1 | 100 |
| bta-miR-2404 | -15.1 | 451 |
| bta-miR-2404 | -14.5 | 367 |
| bta-miR-2404 | -14.4 | 28  |
| bta-miR-2404 | -13.4 | 542 |
| bta-miR-2404 | -13.2 | 559 |
| bta-miR-2404 | -12.8 | 423 |
| bta-miR-2404 | -12.1 | 165 |
| bta-miR-2404 | -11.9 | 663 |
| bta-miR-2404 | -11.4 | 51  |
| bta-miR-2404 | -11.2 | 523 |
| bta-miR-2404 | -10.9 | 278 |
| bta-miR-2404 | -10.7 | 224 |
| bta-miR-2404 | -10.6 | 338 |
| bta-miR-2404 | -10.2 | 128 |
| bta-miR-449d | -25.0 | 111 |
| bta-miR-449d | -24.4 | 60  |
| bta-miR-449d | -24.1 | 401 |

|              |       |     |
|--------------|-------|-----|
| bta-miR-449d | -23.3 | 190 |
| bta-miR-449d | -21.0 | 484 |
| bta-miR-449d | -20.8 | 146 |
| bta-miR-449d | -19.0 | 14  |
| bta-miR-449d | -18.9 | 236 |
| bta-miR-449d | -18.7 | 431 |
| bta-miR-449d | -18.5 | 368 |
| bta-miR-449d | -18.4 | 34  |
| bta-miR-449d | -18.2 | 461 |
| bta-miR-449d | -18.1 | 259 |
| bta-miR-449d | -17.2 | 579 |
| bta-miR-449d | -17.1 | 317 |
| bta-miR-449d | -16.0 | 625 |
| bta-miR-449d | -15.6 | 170 |
| bta-miR-449d | -15.3 | 346 |
| bta-miR-449d | -14.9 | 299 |
| bta-miR-449d | -14.8 | 650 |
| bta-miR-449d | -14.5 | 515 |
| bta-miR-449d | -13.9 | 559 |
| bta-miR-449d | -13.4 | 90  |
| bta-miR-449d | -12.3 | 132 |
| bta-miR-449d | -12.2 | 737 |
| bta-miR-449d | -11.9 | 681 |
| bta-miR-449d | -11.3 | 607 |
| bta-miR-449d | -11.1 | 447 |
| bta-miR-449d | -11.1 | 80  |
| bta-miR-449d | -10.2 | 703 |
| bta-miR-2405 | -25.2 | 114 |
| bta-miR-2405 | -24.9 | 480 |
| bta-miR-2405 | -23.1 | 418 |
| bta-miR-2405 | -20.7 | 357 |
| bta-miR-2405 | -19.6 | 154 |
| bta-miR-2405 | -19.4 | 41  |
| bta-miR-2405 | -19.3 | 70  |
| bta-miR-2405 | -17.6 | 586 |
| bta-miR-2405 | -17.5 | 11  |
| bta-miR-2405 | -16.9 | 621 |
| bta-miR-2405 | -16.7 | 268 |
| bta-miR-2405 | -16.6 | 233 |
| bta-miR-2405 | -16.4 | 449 |
| bta-miR-2405 | -16.3 | 563 |
| bta-miR-2405 | -16.1 | 174 |
| bta-miR-2405 | -16.1 | 308 |
| bta-miR-2405 | -14.9 | 331 |
| bta-miR-2405 | -14.3 | 499 |
| bta-miR-2405 | -13.5 | 405 |
| bta-miR-2405 | -12.9 | 663 |
| bta-miR-2405 | -12.7 | 464 |
| bta-miR-2405 | -12.5 | 136 |
| bta-miR-2405 | -12.3 | 97  |
| bta-miR-2405 | -11.9 | 698 |
| bta-miR-2405 | -11.7 | 218 |
| bta-miR-2405 | -11.6 | 575 |
| bta-miR-2405 | -11.6 | 604 |
| bta-miR-2405 | -10.4 | 727 |
| bta-miR-2406 | -23.9 | 234 |
| bta-miR-2406 | -22.0 | 409 |
| bta-miR-2406 | -21.0 | 277 |
| bta-miR-2406 | -21.0 | 127 |

|              |       |     |
|--------------|-------|-----|
| bta-miR-2406 | -20.8 | 191 |
| bta-miR-2406 | -20.5 | 391 |
| bta-miR-2406 | -19.9 | 460 |
| bta-miR-2406 | -19.5 | 89  |
| bta-miR-2406 | -19.1 | 706 |
| bta-miR-2406 | -18.3 | 555 |
| bta-miR-2406 | -18.2 | 626 |
| bta-miR-2406 | -18.1 | 493 |
| bta-miR-2406 | -16.8 | 663 |
| bta-miR-2406 | -16.2 | 44  |
| bta-miR-2406 | -15.2 | 151 |
| bta-miR-2406 | -15.2 | 309 |
| bta-miR-2406 | -15.0 | 356 |
| bta-miR-2406 | -14.7 | 8   |
| bta-miR-2406 | -13.8 | 179 |
| bta-miR-2406 | -12.9 | 113 |
| bta-miR-2406 | -12.4 | 72  |
| bta-miR-2406 | -11.6 | 583 |
| bta-miR-2406 | -11.5 | 516 |
| bta-miR-2406 | -10.9 | 691 |
| bta-miR-2406 | -10.8 | 170 |
| bta-miR-2406 | -10.6 | 740 |
| bta-miR-2406 | -10.3 | 484 |
| bta-miR-2406 | -10.0 | 263 |
| bta-miR-2407 | -29.0 | 107 |
| bta-miR-2407 | -27.2 | 318 |
| bta-miR-2407 | -26.6 | 155 |
| bta-miR-2407 | -26.2 | 243 |
| bta-miR-2407 | -26.1 | 392 |
| bta-miR-2407 | -25.8 | 127 |
| bta-miR-2407 | -25.8 | 85  |
| bta-miR-2407 | -23.6 | 559 |
| bta-miR-2407 | -22.9 | 456 |
| bta-miR-2407 | -21.9 | 576 |
| bta-miR-2407 | -21.8 | 50  |
| bta-miR-2407 | -21.5 | 515 |
| bta-miR-2407 | -21.2 | 207 |
| bta-miR-2407 | -20.9 | 361 |
| bta-miR-2407 | -20.2 | 9   |
| bta-miR-2407 | -19.9 | 482 |
| bta-miR-2407 | -19.3 | 282 |
| bta-miR-2407 | -17.0 | 623 |
| bta-miR-2407 | -16.6 | 183 |
| bta-miR-2407 | -15.8 | 653 |
| bta-miR-2407 | -15.7 | 687 |
| bta-miR-2407 | -13.3 | 342 |
| bta-miR-2407 | -13.0 | 33  |
| bta-miR-2407 | -12.2 | 703 |
| bta-miR-2407 | -11.9 | 72  |
| bta-miR-2407 | -11.7 | 740 |
| bta-miR-2407 | -11.2 | 539 |
| bta-miR-2407 | -11.0 | 495 |
| bta-miR-2408 | -28.8 | 12  |
| bta-miR-2408 | -25.0 | 617 |
| bta-miR-2408 | -23.9 | 413 |
| bta-miR-2408 | -22.2 | 462 |
| bta-miR-2408 | -20.6 | 72  |
| bta-miR-2408 | -20.4 | 342 |
| bta-miR-2408 | -19.5 | 110 |

|              |       |     |
|--------------|-------|-----|
| bta-miR-2408 | -19.4 | 369 |
| bta-miR-2408 | -19.2 | 582 |
| bta-miR-2408 | -17.4 | 169 |
| bta-miR-2408 | -16.9 | 28  |
| bta-miR-2408 | -16.8 | 270 |
| bta-miR-2408 | -15.4 | 598 |
| bta-miR-2408 | -15.1 | 560 |
| bta-miR-2408 | -15.1 | 450 |
| bta-miR-2408 | -14.8 | 155 |
| bta-miR-2408 | -14.2 | 740 |
| bta-miR-2408 | -14.1 | 199 |
| bta-miR-2408 | -13.7 | 662 |
| bta-miR-2408 | -13.6 | 216 |
| bta-miR-2408 | -12.9 | 237 |
| bta-miR-2408 | -12.9 | 515 |
| bta-miR-2408 | -12.8 | 146 |
| bta-miR-2408 | -12.5 | 50  |
| bta-miR-2408 | -12.5 | 126 |
| bta-miR-2408 | -11.5 | 698 |
| bta-miR-2408 | -10.8 | 403 |
| bta-miR-2408 | -10.6 | 499 |
| bta-miR-2408 | -10.3 | 313 |
| bta-miR-2409 | -28.7 | 12  |
| bta-miR-2409 | -23.8 | 418 |
| bta-miR-2409 | -23.5 | 70  |
| bta-miR-2409 | -23.0 | 615 |
| bta-miR-2409 | -21.1 | 480 |
| bta-miR-2409 | -19.7 | 219 |
| bta-miR-2409 | -19.0 | 114 |
| bta-miR-2409 | -18.8 | 175 |
| bta-miR-2409 | -18.4 | 268 |
| bta-miR-2409 | -17.9 | 449 |
| bta-miR-2409 | -15.9 | 516 |
| bta-miR-2409 | -15.8 | 560 |
| bta-miR-2409 | -15.8 | 342 |
| bta-miR-2409 | -15.7 | 371 |
| bta-miR-2409 | -15.6 | 605 |
| bta-miR-2409 | -13.8 | 653 |
| bta-miR-2409 | -13.6 | 38  |
| bta-miR-2409 | -12.8 | 358 |
| bta-miR-2409 | -12.5 | 154 |
| bta-miR-2409 | -12.4 | 527 |
| bta-miR-2409 | -12.0 | 205 |
| bta-miR-2409 | -11.9 | 464 |
| bta-miR-2409 | -11.8 | 63  |
| bta-miR-2409 | -11.7 | 243 |
| bta-miR-2409 | -11.7 | 393 |
| bta-miR-2409 | -11.6 | 408 |
| bta-miR-2409 | -11.4 | 308 |
| bta-miR-2409 | -10.9 | 257 |
| bta-miR-2409 | -10.4 | 742 |
| bta-miR-2409 | -10.3 | 3   |
| bta-miR-2409 | -10.1 | 472 |
| bta-miR-2410 | -25.9 | 575 |
| bta-miR-2410 | -24.0 | 420 |
| bta-miR-2410 | -22.0 | 147 |
| bta-miR-2410 | -21.8 | 276 |
| bta-miR-2410 | -21.8 | 199 |
| bta-miR-2410 | -21.4 | 391 |

|               |       |     |
|---------------|-------|-----|
| bta-miR-2410  | -21.0 | 502 |
| bta-miR-2410  | -20.9 | 66  |
| bta-miR-2410  | -20.9 | 461 |
| bta-miR-2410  | -20.4 | 628 |
| bta-miR-2410  | -20.0 | 238 |
| bta-miR-2410  | -18.8 | 114 |
| bta-miR-2410  | -17.1 | 172 |
| bta-miR-2410  | -16.6 | 4   |
| bta-miR-2410  | -15.3 | 354 |
| bta-miR-2410  | -15.1 | 606 |
| bta-miR-2410  | -15.0 | 132 |
| bta-miR-2410  | -14.9 | 190 |
| bta-miR-2410  | -14.8 | 704 |
| bta-miR-2410  | -14.8 | 41  |
| bta-miR-2410  | -14.8 | 299 |
| bta-miR-2410  | -14.0 | 655 |
| bta-miR-2410  | -13.6 | 691 |
| bta-miR-2410  | -13.4 | 548 |
| bta-miR-2410  | -12.4 | 739 |
| bta-miR-2410  | -12.4 | 22  |
| bta-miR-2410  | -11.9 | 678 |
| bta-miR-2410  | -11.2 | 319 |
| bta-miR-2410  | -11.1 | 488 |
| bta-miR-2410  | -10.2 | 107 |
| bta-miR-2410  | -10.2 | 451 |
| bta-miR-1584  | -33.7 | 156 |
| bta-miR-1584  | -32.1 | 109 |
| bta-miR-1584  | -31.1 | 244 |
| bta-miR-1584  | -30.6 | 30  |
| bta-miR-1584  | -30.5 | 307 |
| bta-miR-1584  | -28.9 | 415 |
| bta-miR-1584  | -27.3 | 457 |
| bta-miR-1584  | -24.1 | 360 |
| bta-miR-1584  | -23.1 | 88  |
| bta-miR-1584  | -22.8 | 562 |
| bta-miR-1584  | -22.2 | 395 |
| bta-miR-1584  | -20.7 | 187 |
| bta-miR-1584  | -20.6 | 271 |
| bta-miR-1584  | -20.5 | 483 |
| bta-miR-1584  | -20.1 | 3   |
| bta-miR-1584  | -19.2 | 581 |
| bta-miR-1584  | -17.9 | 60  |
| bta-miR-1584  | -17.2 | 519 |
| bta-miR-1584  | -16.4 | 140 |
| bta-miR-1584  | -16.3 | 654 |
| bta-miR-1584  | -16.2 | 624 |
| bta-miR-1584  | -16.0 | 234 |
| bta-miR-1584  | -15.0 | 538 |
| bta-miR-1584  | -14.5 | 377 |
| bta-miR-1584  | -13.9 | 697 |
| bta-miR-1584  | -13.5 | 730 |
| bta-miR-1584  | -12.7 | 262 |
| bta-miR-1584  | -10.9 | 599 |
| bta-miR-1584  | -10.6 | 211 |
| bta-miR-1584  | -10.6 | 337 |
| bta-miR-1584* | -33.5 | 419 |
| bta-miR-1584* | -27.9 | 12  |
| bta-miR-1584* | -26.2 | 616 |
| bta-miR-1584* | -25.1 | 199 |

|               |       |     |
|---------------|-------|-----|
| bta-miR-1584* | -21.4 | 463 |
| bta-miR-1584* | -20.4 | 560 |
| bta-miR-1584* | -20.2 | 72  |
| bta-miR-1584* | -19.0 | 155 |
| bta-miR-1584* | -18.6 | 584 |
| bta-miR-1584* | -16.6 | 337 |
| bta-miR-1584* | -16.5 | 448 |
| bta-miR-1584* | -16.3 | 231 |
| bta-miR-1584* | -16.0 | 112 |
| bta-miR-1584* | -14.0 | 660 |
| bta-miR-1584* | -13.9 | 403 |
| bta-miR-1584* | -13.5 | 371 |
| bta-miR-1584* | -13.5 | 547 |
| bta-miR-1584* | -13.1 | 38  |
| bta-miR-1584* | -12.8 | 1   |
| bta-miR-1584* | -11.7 | 738 |
| bta-miR-1584* | -11.6 | 185 |
| bta-miR-1584* | -11.4 | 60  |
| bta-miR-1584* | -10.6 | 518 |
| bta-miR-1584* | -10.3 | 386 |
| bta-miR-1940  | -25.6 | 481 |
| bta-miR-1940  | -24.9 | 418 |
| bta-miR-1940  | -23.9 | 232 |
| bta-miR-1940  | -23.4 | 71  |
| bta-miR-1940  | -23.0 | 371 |
| bta-miR-1940  | -22.8 | 11  |
| bta-miR-1940  | -22.1 | 275 |
| bta-miR-1940  | -22.1 | 622 |
| bta-miR-1940  | -22.1 | 188 |
| bta-miR-1940  | -21.8 | 102 |
| bta-miR-1940  | -21.0 | 41  |
| bta-miR-1940  | -20.3 | 560 |
| bta-miR-1940  | -19.1 | 154 |
| bta-miR-1940  | -18.4 | 130 |
| bta-miR-1940  | -17.9 | 450 |
| bta-miR-1940  | -17.7 | 653 |
| bta-miR-1940  | -15.8 | 698 |
| bta-miR-1940  | -15.5 | 582 |
| bta-miR-1940  | -13.2 | 737 |
| bta-miR-1940  | -12.7 | 351 |
| bta-miR-1940  | -11.7 | 315 |
| bta-miR-1940  | -11.7 | 407 |
| bta-miR-1940  | -11.6 | 520 |
| bta-miR-1940  | -11.6 | 678 |
| bta-miR-1940  | -10.9 | 542 |
| bta-miR-2411  | -30.2 | 560 |
| bta-miR-2411  | -27.4 | 115 |
| bta-miR-2411  | -27.2 | 482 |
| bta-miR-2411  | -25.0 | 12  |
| bta-miR-2411  | -24.4 | 619 |
| bta-miR-2411  | -24.1 | 85  |
| bta-miR-2411  | -24.0 | 370 |
| bta-miR-2411  | -21.0 | 155 |
| bta-miR-2411  | -21.0 | 413 |
| bta-miR-2411  | -19.2 | 40  |
| bta-miR-2411  | -18.6 | 267 |
| bta-miR-2411  | -18.1 | 654 |
| bta-miR-2411  | -17.9 | 343 |
| bta-miR-2411  | -17.9 | 450 |

|               |       |     |
|---------------|-------|-----|
| bta-miR-2411  | -16.1 | 583 |
| bta-miR-2411  | -16.1 | 741 |
| bta-miR-2411  | -15.6 | 206 |
| bta-miR-2411  | -15.4 | 307 |
| bta-miR-2411  | -14.9 | 1   |
| bta-miR-2411  | -14.2 | 698 |
| bta-miR-2411  | -13.9 | 539 |
| bta-miR-2411  | -13.9 | 519 |
| bta-miR-2411  | -13.6 | 599 |
| bta-miR-2411  | -13.2 | 432 |
| bta-miR-2411  | -12.6 | 244 |
| bta-miR-2411  | -12.5 | 473 |
| bta-miR-2411  | -10.3 | 403 |
| bta-miR-2411  | -10.2 | 326 |
| bta-miR-2411  | -10.2 | 364 |
| bta-miR-2411  | -10.1 | 144 |
| bta-miR-2411* | -26.4 | 614 |
| bta-miR-2411* | -23.5 | 448 |
| bta-miR-2411* | -22.5 | 16  |
| bta-miR-2411* | -20.9 | 217 |
| bta-miR-2411* | -20.8 | 589 |
| bta-miR-2411* | -20.6 | 266 |
| bta-miR-2411* | -20.4 | 478 |
| bta-miR-2411* | -20.4 | 69  |
| bta-miR-2411* | -19.3 | 499 |
| bta-miR-2411* | -18.7 | 412 |
| bta-miR-2411* | -18.3 | 350 |
| bta-miR-2411* | -16.6 | 176 |
| bta-miR-2411* | -15.5 | 94  |
| bta-miR-2411* | -14.7 | 152 |
| bta-miR-2411* | -13.3 | 544 |
| bta-miR-2411* | -13.2 | 736 |
| bta-miR-2411* | -12.3 | 659 |
| bta-miR-2411* | -11.0 | 1   |
| bta-miR-2411* | -10.8 | 609 |
| bta-miR-2411* | -10.7 | 170 |
| bta-miR-2411* | -10.6 | 566 |
| bta-miR-2411* | -10.0 | 383 |
| bta-miR-2412  | -35.1 | 309 |
| bta-miR-2412  | -34.6 | 135 |
| bta-miR-2412  | -29.0 | 396 |
| bta-miR-2412  | -26.7 | 90  |
| bta-miR-2412  | -26.4 | 209 |
| bta-miR-2412  | -25.9 | 458 |
| bta-miR-2412  | -23.0 | 564 |
| bta-miR-2412  | -22.9 | 248 |
| bta-miR-2412  | -21.8 | 3   |
| bta-miR-2412  | -21.8 | 502 |
| bta-miR-2412  | -21.6 | 362 |
| bta-miR-2412  | -19.6 | 474 |
| bta-miR-2412  | -19.4 | 186 |
| bta-miR-2412  | -19.4 | 581 |
| bta-miR-2412  | -18.8 | 117 |
| bta-miR-2412  | -18.5 | 637 |
| bta-miR-2412  | -16.7 | 58  |
| bta-miR-2412  | -16.5 | 692 |
| bta-miR-2412  | -15.1 | 429 |
| bta-miR-2412  | -14.2 | 43  |
| bta-miR-2412  | -13.5 | 677 |



|               |       |     |
|---------------|-------|-----|
| bta-miR-2412  | -12.6 | 623 |
| bta-miR-2412  | -12.3 | 537 |
| bta-miR-2412  | -11.7 | 287 |
| bta-miR-2412  | -11.1 | 740 |
| bta-miR-2412  | -10.9 | 550 |
| bta-miR-2412  | -10.6 | 342 |
| bta-miR-2412  | -10.6 | 170 |
| bta-miR-2412  | -10.3 | 489 |
| bta-miR-2413  | -29.8 | 86  |
| bta-miR-2413  | -27.8 | 460 |
| bta-miR-2413  | -27.4 | 560 |
| bta-miR-2413  | -26.8 | 387 |
| bta-miR-2413  | -26.7 | 492 |
| bta-miR-2413  | -26.0 | 21  |
| bta-miR-2413  | -25.6 | 250 |
| bta-miR-2413  | -24.6 | 162 |
| bta-miR-2413  | -24.1 | 341 |
| bta-miR-2413  | -22.9 | 199 |
| bta-miR-2413  | -22.7 | 618 |
| bta-miR-2413  | -19.5 | 126 |
| bta-miR-2413  | -19.3 | 6   |
| bta-miR-2413  | -18.7 | 425 |
| bta-miR-2413  | -18.4 | 320 |
| bta-miR-2413  | -17.4 | 61  |
| bta-miR-2413  | -15.5 | 580 |
| bta-miR-2413  | -15.4 | 685 |
| bta-miR-2413  | -14.9 | 275 |
| bta-miR-2413  | -14.6 | 654 |
| bta-miR-2413  | -14.5 | 595 |
| bta-miR-2413  | -14.0 | 241 |
| bta-miR-2413  | -13.3 | 516 |
| bta-miR-2413  | -12.2 | 190 |
| bta-miR-2413  | -12.1 | 536 |
| bta-miR-2413  | -11.7 | 739 |
| bta-miR-2413  | -11.1 | 637 |
| bta-miR-2413  | -10.7 | 449 |
| bta-miR-2413  | -10.6 | 307 |
| bta-miR-2413  | -10.1 | 142 |
| bta-miR-2284m | -20.0 | 366 |
| bta-miR-2284m | -16.8 | 592 |
| bta-miR-2284m | -16.7 | 196 |
| bta-miR-2284m | -16.4 | 166 |
| bta-miR-2284m | -16.2 | 273 |
| bta-miR-2284m | -15.7 | 470 |
| bta-miR-2284m | -15.4 | 60  |
| bta-miR-2284m | -15.1 | 108 |
| bta-miR-2284m | -14.7 | 507 |
| bta-miR-2284m | -14.3 | 405 |
| bta-miR-2284m | -14.2 | 621 |
| bta-miR-2284m | -14.2 | 28  |
| bta-miR-2284m | -13.7 | 241 |
| bta-miR-2284m | -13.6 | 706 |
| bta-miR-2284m | -13.6 | 724 |
| bta-miR-2284m | -13.5 | 338 |
| bta-miR-2284m | -13.4 | 5   |
| bta-miR-2284m | -13.1 | 308 |
| bta-miR-2284m | -12.4 | 451 |
| bta-miR-2284m | -12.2 | 91  |
| bta-miR-2284m | -11.9 | 423 |

|               |       |     |
|---------------|-------|-----|
| bta-miR-2284m | -11.8 | 327 |
| bta-miR-2284m | -11.7 | 567 |
| bta-miR-2284m | -11.4 | 142 |
| bta-miR-2284m | -11.2 | 460 |
| bta-miR-2284m | -11.1 | 216 |
| bta-miR-2284m | -10.6 | 581 |
| bta-miR-2284m | -10.5 | 48  |
| bta-miR-2284m | -10.4 | 669 |
| bta-miR-2284m | -10.4 | 552 |
| bta-miR-2414  | -22.1 | 51  |
| bta-miR-2414  | -21.3 | 105 |
| bta-miR-2414  | -20.9 | 559 |
| bta-miR-2414  | -20.8 | 130 |
| bta-miR-2414  | -20.4 | 158 |
| bta-miR-2414  | -19.4 | 480 |
| bta-miR-2414  | -19.3 | 408 |
| bta-miR-2414  | -19.0 | 341 |
| bta-miR-2414  | -19.0 | 372 |
| bta-miR-2414  | -18.4 | 457 |
| bta-miR-2414  | -17.8 | 1   |
| bta-miR-2414  | -17.3 | 243 |
| bta-miR-2414  | -17.1 | 633 |
| bta-miR-2414  | -16.9 | 591 |
| bta-miR-2414  | -16.8 | 202 |
| bta-miR-2414  | -16.8 | 510 |
| bta-miR-2414  | -15.2 | 669 |
| bta-miR-2414  | -15.0 | 82  |
| bta-miR-2414  | -14.1 | 319 |
| bta-miR-2414  | -13.6 | 425 |
| bta-miR-2414  | -12.9 | 282 |
| bta-miR-2414  | -12.8 | 360 |
| bta-miR-2414  | -12.4 | 736 |
| bta-miR-2414  | -11.7 | 229 |
| bta-miR-2414  | -11.0 | 29  |
| bta-miR-2414  | -10.6 | 548 |
| bta-miR-2414  | -10.1 | 704 |
| bta-miR-2415* | -33.3 | 413 |
| bta-miR-2415* | -30.9 | 115 |
| bta-miR-2415* | -28.6 | 167 |
| bta-miR-2415* | -28.2 | 12  |
| bta-miR-2415* | -28.2 | 617 |
| bta-miR-2415* | -27.4 | 72  |
| bta-miR-2415* | -24.7 | 482 |
| bta-miR-2415* | -24.4 | 448 |
| bta-miR-2415* | -23.8 | 563 |
| bta-miR-2415* | -23.1 | 599 |
| bta-miR-2415* | -22.9 | 270 |
| bta-miR-2415* | -18.9 | 38  |
| bta-miR-2415* | -18.4 | 220 |
| bta-miR-2415* | -18.4 | 342 |
| bta-miR-2415* | -18.1 | 369 |
| bta-miR-2415* | -17.5 | 199 |
| bta-miR-2415* | -16.3 | 136 |
| bta-miR-2415* | -16.1 | 308 |
| bta-miR-2415* | -15.1 | 698 |
| bta-miR-2415* | -14.6 | 662 |
| bta-miR-2415* | -14.1 | 242 |
| bta-miR-2415* | -14.1 | 154 |
| bta-miR-2415* | -13.7 | 738 |

|               |       |     |
|---------------|-------|-----|
| bta-miR-2415* | -12.9 | 63  |
| bta-miR-2415* | -12.3 | 97  |
| bta-miR-2415* | -12.3 | 325 |
| bta-miR-2415* | -12.3 | 586 |
| bta-miR-2415* | -11.2 | 393 |
| bta-miR-2415* | -10.8 | 1   |
| bta-miR-2415* | -10.3 | 516 |
| bta-miR-2415  | -27.7 | 88  |
| bta-miR-2415  | -26.0 | 408 |
| bta-miR-2415  | -24.4 | 3   |
| bta-miR-2415  | -24.0 | 463 |
| bta-miR-2415  | -22.1 | 60  |
| bta-miR-2415  | -21.9 | 597 |
| bta-miR-2415  | -21.8 | 565 |
| bta-miR-2415  | -21.3 | 231 |
| bta-miR-2415  | -20.9 | 257 |
| bta-miR-2415  | -20.0 | 616 |
| bta-miR-2415  | -19.9 | 164 |
| bta-miR-2415  | -19.0 | 38  |
| bta-miR-2415  | -18.3 | 504 |
| bta-miR-2415  | -17.2 | 115 |
| bta-miR-2415  | -17.1 | 659 |
| bta-miR-2415  | -16.5 | 147 |
| bta-miR-2415  | -15.8 | 356 |
| bta-miR-2415  | -15.5 | 436 |
| bta-miR-2415  | -14.3 | 177 |
| bta-miR-2415  | -14.0 | 546 |
| bta-miR-2415  | -13.9 | 377 |
| bta-miR-2415  | -13.9 | 308 |
| bta-miR-2415  | -13.9 | 487 |
| bta-miR-2415  | -12.7 | 580 |
| bta-miR-2415  | -12.6 | 198 |
| bta-miR-2415  | -12.4 | 277 |
| bta-miR-2415  | -12.2 | 686 |
| bta-miR-2415  | -12.0 | 740 |
| bta-miR-2415  | -10.7 | 23  |
| bta-miR-2415  | -10.6 | 525 |
| bta-miR-2415  | -10.4 | 644 |
| bta-miR-2415  | -10.3 | 209 |
| bta-miR-2416  | -28.3 | 398 |
| bta-miR-2416  | -26.7 | 58  |
| bta-miR-2416  | -24.1 | 4   |
| bta-miR-2416  | -23.6 | 259 |
| bta-miR-2416  | -23.2 | 512 |
| bta-miR-2416  | -22.9 | 459 |
| bta-miR-2416  | -21.5 | 98  |
| bta-miR-2416  | -20.8 | 637 |
| bta-miR-2416  | -20.7 | 565 |
| bta-miR-2416  | -20.5 | 615 |
| bta-miR-2416  | -18.6 | 491 |
| bta-miR-2416  | -18.4 | 168 |
| bta-miR-2416  | -18.1 | 368 |
| bta-miR-2416  | -15.9 | 193 |
| bta-miR-2416  | -15.8 | 212 |
| bta-miR-2416  | -15.8 | 431 |
| bta-miR-2416  | -15.5 | 591 |
| bta-miR-2416  | -14.2 | 316 |
| bta-miR-2416  | -13.9 | 146 |
| bta-miR-2416  | -13.8 | 34  |

|              |       |     |
|--------------|-------|-----|
| bta-miR-2416 | -13.3 | 626 |
| bta-miR-2416 | -13.2 | 535 |
| bta-miR-2416 | -12.6 | 343 |
| bta-miR-2416 | -12.3 | 692 |
| bta-miR-2416 | -12.3 | 120 |
| bta-miR-2416 | -12.2 | 713 |
| bta-miR-2416 | -11.8 | 284 |
| bta-miR-2416 | -11.5 | 384 |
| bta-miR-2416 | -10.3 | 90  |
| bta-miR-2416 | -10.2 | 136 |
| bta-miR-2417 | -21.1 | 39  |
| bta-miR-2417 | -20.8 | 539 |
| bta-miR-2417 | -18.5 | 516 |
| bta-miR-2417 | -17.2 | 379 |
| bta-miR-2417 | -17.1 | 277 |
| bta-miR-2417 | -17.1 | 356 |
| bta-miR-2417 | -16.9 | 463 |
| bta-miR-2417 | -16.4 | 575 |
| bta-miR-2417 | -16.2 | 307 |
| bta-miR-2417 | -16.0 | 181 |
| bta-miR-2417 | -15.4 | 67  |
| bta-miR-2417 | -15.3 | 25  |
| bta-miR-2417 | -15.0 | 113 |
| bta-miR-2417 | -14.9 | 632 |
| bta-miR-2417 | -14.8 | 490 |
| bta-miR-2417 | -14.8 | 200 |
| bta-miR-2417 | -14.8 | 410 |
| bta-miR-2417 | -14.3 | 390 |
| bta-miR-2417 | -14.1 | 238 |
| bta-miR-2417 | -14.0 | 423 |
| bta-miR-2417 | -13.7 | 657 |
| bta-miR-2417 | -13.6 | 1   |
| bta-miR-2417 | -13.3 | 263 |
| bta-miR-2417 | -13.1 | 80  |
| bta-miR-2417 | -12.0 | 678 |
| bta-miR-2417 | -11.7 | 137 |
| bta-miR-2417 | -11.7 | 617 |
| bta-miR-2417 | -11.5 | 478 |
| bta-miR-2417 | -11.1 | 316 |
| bta-miR-2417 | -11.1 | 17  |
| bta-miR-2417 | -10.7 | 93  |
| bta-miR-2417 | -10.7 | 154 |
| bta-miR-2417 | -10.7 | 337 |
| bta-miR-2417 | -10.4 | 743 |
| bta-miR-2417 | -10.4 | 603 |
| bta-miR-2417 | -10.3 | 707 |
| bta-miR-2417 | -10.3 | 58  |
| bta-miR-2417 | -10.3 | 328 |
| bta-miR-2417 | -10.2 | 504 |
| bta-miR-2417 | -10.1 | 167 |
| bta-miR-2418 | -29.9 | 119 |
| bta-miR-2418 | -24.1 | 366 |
| bta-miR-2418 | -23.0 | 414 |
| bta-miR-2418 | -22.9 | 312 |
| bta-miR-2418 | -22.2 | 143 |
| bta-miR-2418 | -21.7 | 235 |
| bta-miR-2418 | -21.4 | 560 |
| bta-miR-2418 | -21.0 | 72  |
| bta-miR-2418 | -20.4 | 20  |

|               |       |     |
|---------------|-------|-----|
| bta-miR-2418  | -20.4 | 482 |
| bta-miR-2418  | -20.0 | 45  |
| bta-miR-2418  | -19.1 | 188 |
| bta-miR-2418  | -18.0 | 451 |
| bta-miR-2418  | -16.9 | 1   |
| bta-miR-2418  | -16.5 | 697 |
| bta-miR-2418  | -16.4 | 95  |
| bta-miR-2418  | -15.6 | 659 |
| bta-miR-2418  | -15.5 | 267 |
| bta-miR-2418  | -15.2 | 738 |
| bta-miR-2418  | -14.7 | 341 |
| bta-miR-2418  | -14.0 | 595 |
| bta-miR-2418  | -13.8 | 635 |
| bta-miR-2418  | -13.4 | 394 |
| bta-miR-2418  | -12.7 | 405 |
| bta-miR-2418  | -12.7 | 518 |
| bta-miR-2418  | -11.6 | 305 |
| bta-miR-2418  | -11.1 | 611 |
| bta-miR-2418  | -10.9 | 473 |
| bta-miR-2284b | -18.0 | 47  |
| bta-miR-2284b | -18.0 | 405 |
| bta-miR-2284b | -16.2 | 479 |
| bta-miR-2284b | -15.4 | 124 |
| bta-miR-2284b | -15.4 | 225 |
| bta-miR-2284b | -15.2 | 166 |
| bta-miR-2284b | -15.2 | 441 |
| bta-miR-2284b | -14.9 | 338 |
| bta-miR-2284b | -14.8 | 102 |
| bta-miR-2284b | -14.8 | 263 |
| bta-miR-2284b | -14.4 | 506 |
| bta-miR-2284b | -13.3 | 308 |
| bta-miR-2284b | -12.8 | 589 |
| bta-miR-2284b | -12.8 | 196 |
| bta-miR-2284b | -12.7 | 272 |
| bta-miR-2284b | -12.7 | 20  |
| bta-miR-2284b | -12.7 | 80  |
| bta-miR-2284b | -12.5 | 648 |
| bta-miR-2284b | -12.2 | 366 |
| bta-miR-2284b | -11.8 | 620 |
| bta-miR-2284b | -11.7 | 570 |
| bta-miR-2284b | -11.6 | 669 |
| bta-miR-2284b | -11.5 | 176 |
| bta-miR-2284b | -11.5 | 735 |
| bta-miR-2284b | -11.4 | 495 |
| bta-miR-2284b | -10.5 | 701 |
| bta-miR-1814c | -20.1 | 350 |
| bta-miR-1814c | -19.0 | 268 |
| bta-miR-1814c | -18.8 | 103 |
| bta-miR-1814c | -18.2 | 159 |
| bta-miR-1814c | -16.8 | 454 |
| bta-miR-1814c | -16.7 | 480 |
| bta-miR-1814c | -16.1 | 228 |
| bta-miR-1814c | -15.4 | 184 |
| bta-miR-1814c | -15.1 | 326 |
| bta-miR-1814c | -14.6 | 599 |
| bta-miR-1814c | -14.1 | 405 |
| bta-miR-1814c | -14.1 | 423 |
| bta-miR-1814c | -14.0 | 28  |
| bta-miR-1814c | -13.5 | 508 |

|               |       |     |
|---------------|-------|-----|
| bta-miR-1814c | -13.1 | 204 |
| bta-miR-1814c | -12.9 | 138 |
| bta-miR-1814c | -12.8 | 726 |
| bta-miR-1814c | -12.5 | 303 |
| bta-miR-1814c | -12.1 | 48  |
| bta-miR-1814c | -11.8 | 650 |
| bta-miR-1814c | -11.6 | 10  |
| bta-miR-1814c | -11.2 | 557 |
| bta-miR-1814c | -10.5 | 622 |
| bta-miR-1814c | -10.5 | 79  |
| bta-miR-1814c | -10.0 | 320 |
| bta-miR-2419  | -26.2 | 10  |
| bta-miR-2419  | -23.1 | 601 |
| bta-miR-2419  | -22.1 | 80  |
| bta-miR-2419  | -18.5 | 348 |
| bta-miR-2419  | -17.6 | 494 |
| bta-miR-2419  | -16.5 | 198 |
| bta-miR-2419  | -16.0 | 543 |
| bta-miR-2419  | -15.8 | 264 |
| bta-miR-2419  | -15.5 | 238 |
| bta-miR-2419  | -15.0 | 38  |
| bta-miR-2419  | -14.8 | 170 |
| bta-miR-2419  | -14.7 | 410 |
| bta-miR-2419  | -14.5 | 440 |
| bta-miR-2419  | -14.5 | 653 |
| bta-miR-2419  | -13.9 | 737 |
| bta-miR-2419  | -13.7 | 576 |
| bta-miR-2419  | -13.4 | 623 |
| bta-miR-2419  | -12.6 | 516 |
| bta-miR-2419  | -12.1 | 65  |
| bta-miR-2419  | -11.8 | 105 |
| bta-miR-2419  | -11.2 | 128 |
| bta-miR-2419* | -29.0 | 550 |
| bta-miR-2419* | -23.6 | 347 |
| bta-miR-2419* | -23.4 | 1   |
| bta-miR-2419* | -23.2 | 413 |
| bta-miR-2419* | -23.1 | 229 |
| bta-miR-2419* | -20.4 | 654 |
| bta-miR-2419* | -20.2 | 452 |
| bta-miR-2419* | -19.8 | 311 |
| bta-miR-2419* | -19.3 | 478 |
| bta-miR-2419* | -19.1 | 113 |
| bta-miR-2419* | -18.7 | 205 |
| bta-miR-2419* | -18.4 | 500 |
| bta-miR-2419* | -18.1 | 372 |
| bta-miR-2419* | -18.1 | 161 |
| bta-miR-2419* | -17.6 | 81  |
| bta-miR-2419* | -17.5 | 38  |
| bta-miR-2419* | -16.5 | 614 |
| bta-miR-2419* | -16.3 | 174 |
| bta-miR-2419* | -16.1 | 570 |
| bta-miR-2419* | -16.0 | 326 |
| bta-miR-2419* | -14.7 | 266 |
| bta-miR-2419* | -14.6 | 685 |
| bta-miR-2419* | -14.5 | 94  |
| bta-miR-2419* | -14.5 | 128 |
| bta-miR-2419* | -14.1 | 516 |
| bta-miR-2419* | -13.1 | 292 |
| bta-miR-2419* | -13.1 | 137 |

|               |       |     |
|---------------|-------|-----|
| bta-miR-2419* | -12.9 | 147 |
| bta-miR-2419* | -12.8 | 63  |
| bta-miR-2419* | -12.6 | 589 |
| bta-miR-2419* | -12.1 | 742 |
| bta-miR-2419* | -11.2 | 529 |
| bta-miR-2419* | -10.9 | 251 |
| bta-miR-2419* | -10.5 | 408 |
| bta-miR-2419* | -10.4 | 342 |
| bta-miR-2419* | -10.2 | 705 |
| bta-miR-2420  | -18.5 | 153 |
| bta-miR-2420  | -18.0 | 175 |
| bta-miR-2420  | -17.5 | 405 |
| bta-miR-2420  | -17.2 | 731 |
| bta-miR-2420  | -15.6 | 349 |
| bta-miR-2420  | -14.9 | 101 |
| bta-miR-2420  | -14.6 | 222 |
| bta-miR-2420  | -14.4 | 479 |
| bta-miR-2420  | -14.2 | 600 |
| bta-miR-2420  | -14.0 | 613 |
| bta-miR-2420  | -13.9 | 16  |
| bta-miR-2420  | -13.7 | 442 |
| bta-miR-2420  | -13.6 | 371 |
| bta-miR-2420  | -13.3 | 268 |
| bta-miR-2420  | -13.1 | 197 |
| bta-miR-2420  | -12.4 | 574 |
| bta-miR-2420  | -12.1 | 65  |
| bta-miR-2420  | -12.0 | 80  |
| bta-miR-2420  | -11.9 | 651 |
| bta-miR-2420  | -11.4 | 313 |
| bta-miR-2420  | -11.3 | 49  |
| bta-miR-2420  | -11.2 | 129 |
| bta-miR-2420  | -10.9 | 300 |
| bta-miR-2420  | -10.7 | 334 |
| bta-miR-2420  | -10.7 | 555 |
| bta-miR-2420  | -10.1 | 469 |
| bta-miR-2421  | -15.2 | 65  |
| bta-miR-2421  | -14.7 | 600 |
| bta-miR-2421  | -14.5 | 351 |
| bta-miR-2421  | -14.1 | 159 |
| bta-miR-2421  | -13.4 | 434 |
| bta-miR-2421  | -13.2 | 204 |
| bta-miR-2421  | -12.9 | 11  |
| bta-miR-2421  | -12.5 | 737 |
| bta-miR-2421  | -12.4 | 267 |
| bta-miR-2421  | -11.8 | 477 |
| bta-miR-2421  | -11.3 | 504 |
| bta-miR-2421  | -11.0 | 336 |
| bta-miR-2421  | -10.3 | 418 |
| bta-miR-2421  | -10.2 | 39  |
| bta-miR-2421  | -10.2 | 621 |
| bta-miR-2422  | -27.6 | 564 |
| bta-miR-2422  | -25.4 | 19  |
| bta-miR-2422  | -24.1 | 378 |
| bta-miR-2422  | -23.6 | 461 |
| bta-miR-2422  | -22.9 | 132 |
| bta-miR-2422  | -22.6 | 257 |
| bta-miR-2422  | -22.1 | 491 |
| bta-miR-2422  | -21.8 | 342 |
| bta-miR-2422  | -21.8 | 316 |

|              |       |     |
|--------------|-------|-----|
| bta-miR-2422 | -21.1 | 421 |
| bta-miR-2422 | -20.9 | 60  |
| bta-miR-2422 | -20.9 | 161 |
| bta-miR-2422 | -20.6 | 190 |
| bta-miR-2422 | -19.6 | 235 |
| bta-miR-2422 | -18.9 | 87  |
| bta-miR-2422 | -18.2 | 695 |
| bta-miR-2422 | -17.6 | 650 |
| bta-miR-2422 | -16.9 | 291 |
| bta-miR-2422 | -16.1 | 624 |
| bta-miR-2422 | -14.6 | 117 |
| bta-miR-2422 | -14.0 | 515 |
| bta-miR-2422 | -13.7 | 596 |
| bta-miR-2422 | -13.6 | 2   |
| bta-miR-2422 | -13.0 | 39  |
| bta-miR-2422 | -12.7 | 403 |
| bta-miR-2422 | -12.3 | 739 |
| bta-miR-2422 | -11.5 | 537 |
| bta-miR-2422 | -11.1 | 673 |
| bta-miR-2422 | -10.5 | 282 |
| bta-miR-2422 | -10.4 | 481 |
| bta-miR-2422 | -10.0 | 367 |
| bta-miR-2422 | -10.0 | 583 |
| bta-miR-1843 | -27.5 | 605 |
| bta-miR-1843 | -26.4 | 220 |
| bta-miR-1843 | -24.8 | 419 |
| bta-miR-1843 | -24.7 | 350 |
| bta-miR-1843 | -22.7 | 66  |
| bta-miR-1843 | -22.5 | 8   |
| bta-miR-1843 | -22.2 | 266 |
| bta-miR-1843 | -21.7 | 482 |
| bta-miR-1843 | -21.3 | 109 |
| bta-miR-1843 | -20.3 | 155 |
| bta-miR-1843 | -19.6 | 197 |
| bta-miR-1843 | -16.9 | 586 |
| bta-miR-1843 | -16.5 | 35  |
| bta-miR-1843 | -16.1 | 555 |
| bta-miR-1843 | -15.9 | 736 |
| bta-miR-1843 | -15.3 | 406 |
| bta-miR-1843 | -15.1 | 632 |
| bta-miR-1843 | -14.0 | 129 |
| bta-miR-1843 | -13.7 | 463 |
| bta-miR-1843 | -12.1 | 308 |
| bta-miR-1843 | -11.9 | 379 |
| bta-miR-1843 | -10.7 | 698 |
| bta-miR-1843 | -10.5 | 177 |
| bta-miR-1843 | -10.1 | 92  |
| bta-miR-320b | -28.3 | 161 |
| bta-miR-320b | -23.8 | 468 |
| bta-miR-320b | -22.9 | 392 |
| bta-miR-320b | -22.9 | 244 |
| bta-miR-320b | -22.7 | 318 |
| bta-miR-320b | -22.4 | 560 |
| bta-miR-320b | -22.2 | 116 |
| bta-miR-320b | -21.1 | 51  |
| bta-miR-320b | -21.1 | 361 |
| bta-miR-320b | -21.0 | 207 |
| bta-miR-320b | -20.4 | 138 |
| bta-miR-320b | -19.9 | 2   |



|              |       |     |
|--------------|-------|-----|
| bta-miR-320b | -19.3 | 425 |
| bta-miR-320b | -18.3 | 30  |
| bta-miR-320b | -18.2 | 510 |
| bta-miR-320b | -18.1 | 636 |
| bta-miR-320b | -17.7 | 185 |
| bta-miR-320b | -17.3 | 86  |
| bta-miR-320b | -17.2 | 669 |
| bta-miR-320b | -15.6 | 578 |
| bta-miR-320b | -14.7 | 414 |
| bta-miR-320b | -14.5 | 712 |
| bta-miR-320b | -14.0 | 457 |
| bta-miR-320b | -13.9 | 271 |
| bta-miR-320b | -13.3 | 594 |
| bta-miR-320b | -12.6 | 341 |
| bta-miR-320b | -12.2 | 305 |
| bta-miR-320b | -12.0 | 374 |
| bta-miR-320b | -11.6 | 624 |
| bta-miR-320b | -11.1 | 490 |
| bta-miR-320b | -11.1 | 236 |
| bta-miR-320b | -11.1 | 534 |
| bta-miR-320b | -10.4 | 110 |
| bta-miR-320b | -10.1 | 286 |
| bta-miR-320b | -10.0 | 382 |
| bta-miR-2423 | -22.2 | 102 |
| bta-miR-2423 | -19.6 | 154 |
| bta-miR-2423 | -18.3 | 448 |
| bta-miR-2423 | -17.9 | 176 |
| bta-miR-2423 | -17.1 | 41  |
| bta-miR-2423 | -16.8 | 350 |
| bta-miR-2423 | -16.2 | 219 |
| bta-miR-2423 | -16.0 | 371 |
| bta-miR-2423 | -15.9 | 630 |
| bta-miR-2423 | -15.4 | 68  |
| bta-miR-2423 | -15.4 | 16  |
| bta-miR-2423 | -14.6 | 598 |
| bta-miR-2423 | -14.1 | 710 |
| bta-miR-2423 | -13.9 | 557 |
| bta-miR-2423 | -13.9 | 499 |
| bta-miR-2423 | -13.7 | 418 |
| bta-miR-2423 | -13.5 | 613 |
| bta-miR-2423 | -13.3 | 125 |
| bta-miR-2423 | -13.2 | 482 |
| bta-miR-2423 | -13.1 | 269 |
| bta-miR-2423 | -12.8 | 202 |
| bta-miR-2423 | -12.4 | 313 |
| bta-miR-2423 | -11.4 | 575 |
| bta-miR-2423 | -11.0 | 138 |
| bta-miR-2423 | -10.5 | 407 |
| bta-miR-2423 | -10.0 | 301 |
| bta-miR-2423 | -10.0 | 334 |
| bta-miR-2424 | -25.9 | 456 |
| bta-miR-2424 | -25.4 | 563 |
| bta-miR-2424 | -24.6 | 50  |
| bta-miR-2424 | -24.3 | 482 |
| bta-miR-2424 | -19.5 | 85  |
| bta-miR-2424 | -18.3 | 653 |
| bta-miR-2424 | -17.8 | 108 |
| bta-miR-2424 | -17.8 | 222 |
| bta-miR-2424 | -17.7 | 407 |

|               |       |     |
|---------------|-------|-----|
| bta-miR-2424  | -16.2 | 155 |
| bta-miR-2424  | -16.1 | 17  |
| bta-miR-2424  | -15.8 | 342 |
| bta-miR-2424  | -15.0 | 308 |
| bta-miR-2424  | -14.7 | 381 |
| bta-miR-2424  | -14.6 | 605 |
| bta-miR-2424  | -14.6 | 258 |
| bta-miR-2424  | -14.5 | 184 |
| bta-miR-2424  | -14.5 | 581 |
| bta-miR-2424  | -14.4 | 687 |
| bta-miR-2424  | -14.2 | 125 |
| bta-miR-2424  | -13.1 | 4   |
| bta-miR-2424  | -13.1 | 740 |
| bta-miR-2424  | -12.8 | 539 |
| bta-miR-2424  | -11.2 | 243 |
| bta-miR-2424  | -10.1 | 511 |
| bta-miR-2425  | -26.0 | 418 |
| bta-miR-2425  | -24.7 | 354 |
| bta-miR-2425  | -24.5 | 497 |
| bta-miR-2425  | -24.4 | 81  |
| bta-miR-2425  | -23.7 | 454 |
| bta-miR-2425  | -20.9 | 230 |
| bta-miR-2425  | -20.0 | 618 |
| bta-miR-2425  | -19.9 | 9   |
| bta-miR-2425  | -19.8 | 532 |
| bta-miR-2425  | -18.9 | 573 |
| bta-miR-2425  | -17.7 | 389 |
| bta-miR-2425  | -17.1 | 657 |
| bta-miR-2425  | -16.8 | 55  |
| bta-miR-2425  | -16.3 | 146 |
| bta-miR-2425  | -16.1 | 596 |
| bta-miR-2425  | -15.9 | 263 |
| bta-miR-2425  | -15.3 | 370 |
| bta-miR-2425  | -14.7 | 294 |
| bta-miR-2425  | -14.7 | 709 |
| bta-miR-2425  | -14.4 | 480 |
| bta-miR-2425  | -13.6 | 551 |
| bta-miR-2425  | -13.1 | 311 |
| bta-miR-2425  | -13.1 | 115 |
| bta-miR-2425  | -13.1 | 177 |
| bta-miR-2425  | -12.5 | 206 |
| bta-miR-2425  | -11.7 | 42  |
| bta-miR-2425  | -11.6 | 741 |
| bta-miR-2425  | -11.4 | 680 |
| bta-miR-2425  | -10.9 | 252 |
| bta-miR-2425  | -10.8 | 336 |
| bta-miR-2425  | -10.2 | 328 |
| bta-miR-2425* | -30.9 | 613 |
| bta-miR-2425* | -27.3 | 479 |
| bta-miR-2425* | -26.8 | 414 |
| bta-miR-2425* | -23.3 | 68  |
| bta-miR-2425* | -23.1 | 598 |
| bta-miR-2425* | -22.7 | 12  |
| bta-miR-2425* | -21.3 | 450 |
| bta-miR-2425* | -18.4 | 219 |
| bta-miR-2425* | -17.3 | 265 |
| bta-miR-2425* | -16.2 | 171 |
| bta-miR-2425* | -15.7 | 109 |
| bta-miR-2425* | -12.9 | 573 |

|               |       |     |
|---------------|-------|-----|
| bta-miR-2425* | -12.3 | 357 |
| bta-miR-2425* | -11.9 | 28  |
| bta-miR-2425* | -11.3 | 202 |
| bta-miR-2425* | -10.9 | 560 |
| bta-miR-2425* | -10.8 | 654 |
| bta-miR-2426  | -25.1 | 400 |
| bta-miR-2426  | -24.5 | 32  |
| bta-miR-2426  | -23.1 | 110 |
| bta-miR-2426  | -23.1 | 626 |
| bta-miR-2426  | -22.2 | 140 |
| bta-miR-2426  | -21.9 | 259 |
| bta-miR-2426  | -21.3 | 466 |
| bta-miR-2426  | -20.7 | 191 |
| bta-miR-2426  | -20.5 | 236 |
| bta-miR-2426  | -19.7 | 316 |
| bta-miR-2426  | -18.4 | 691 |
| bta-miR-2426  | -17.5 | 74  |
| bta-miR-2426  | -17.5 | 502 |
| bta-miR-2426  | -17.2 | 567 |
| bta-miR-2426  | -17.0 | 430 |
| bta-miR-2426  | -16.9 | 368 |
| bta-miR-2426  | -16.3 | 665 |
| bta-miR-2426  | -15.8 | 455 |
| bta-miR-2426  | -15.5 | 133 |
| bta-miR-2426  | -14.9 | 5   |
| bta-miR-2426  | -13.9 | 168 |
| bta-miR-2426  | -13.9 | 485 |
| bta-miR-2426  | -13.6 | 552 |
| bta-miR-2426  | -13.6 | 646 |
| bta-miR-2426  | -13.2 | 342 |
| bta-miR-2426  | -12.7 | 596 |
| bta-miR-2426  | -11.5 | 740 |
| bta-miR-2426  | -11.0 | 309 |
| bta-miR-2426  | -10.5 | 390 |
| bta-miR-2426  | -10.2 | 96  |
| bta-miR-2426  | -10.2 | 214 |
| bta-miR-2427  | -25.2 | 623 |
| bta-miR-2427  | -22.9 | 243 |
| bta-miR-2427  | -22.2 | 165 |
| bta-miR-2427  | -20.9 | 361 |
| bta-miR-2427  | -20.5 | 393 |
| bta-miR-2427  | -20.4 | 107 |
| bta-miR-2427  | -20.1 | 429 |
| bta-miR-2427  | -20.0 | 72  |
| bta-miR-2427  | -19.6 | 472 |
| bta-miR-2427  | -19.6 | 205 |
| bta-miR-2427  | -18.6 | 563 |
| bta-miR-2427  | -18.5 | 29  |
| bta-miR-2427  | -17.5 | 576 |
| bta-miR-2427  | -16.7 | 516 |
| bta-miR-2427  | -16.4 | 495 |
| bta-miR-2427  | -16.3 | 342 |
| bta-miR-2427  | -16.2 | 715 |
| bta-miR-2427  | -15.8 | 282 |
| bta-miR-2427  | -15.0 | 8   |
| bta-miR-2427  | -14.5 | 261 |
| bta-miR-2427  | -14.1 | 653 |
| bta-miR-2427  | -12.6 | 125 |
| bta-miR-2427  | -12.4 | 326 |

|              |       |     |
|--------------|-------|-----|
| bta-miR-2427 | -12.4 | 234 |
| bta-miR-2427 | -11.6 | 698 |
| bta-miR-2427 | -11.2 | 596 |
| bta-miR-2427 | -10.9 | 419 |
| bta-miR-2427 | -10.4 | 97  |
| bta-miR-2427 | -10.0 | 58  |
| bta-miR-2428 | -27.4 | 473 |
| bta-miR-2428 | -26.0 | 563 |
| bta-miR-2428 | -25.8 | 111 |
| bta-miR-2428 | -25.7 | 408 |
| bta-miR-2428 | -25.6 | 139 |
| bta-miR-2428 | -23.0 | 361 |
| bta-miR-2428 | -22.7 | 57  |
| bta-miR-2428 | -21.7 | 261 |
| bta-miR-2428 | -21.7 | 181 |
| bta-miR-2428 | -21.3 | 3   |
| bta-miR-2428 | -20.7 | 308 |
| bta-miR-2428 | -20.1 | 682 |
| bta-miR-2428 | -20.0 | 510 |
| bta-miR-2428 | -19.8 | 636 |
| bta-miR-2428 | -19.5 | 213 |
| bta-miR-2428 | -18.0 | 34  |
| bta-miR-2428 | -17.0 | 457 |
| bta-miR-2428 | -16.3 | 657 |
| bta-miR-2428 | -15.8 | 596 |
| bta-miR-2428 | -15.6 | 88  |
| bta-miR-2428 | -15.6 | 327 |
| bta-miR-2428 | -14.8 | 540 |
| bta-miR-2428 | -13.8 | 169 |
| bta-miR-2428 | -13.6 | 622 |
| bta-miR-2428 | -13.0 | 431 |
| bta-miR-2428 | -12.7 | 132 |
| bta-miR-2428 | -12.5 | 703 |
| bta-miR-2428 | -11.9 | 739 |
| bta-miR-2428 | -11.8 | 286 |
| bta-miR-2428 | -11.6 | 246 |
| bta-miR-2428 | -11.6 | 397 |
| bta-miR-2428 | -10.5 | 202 |
| bta-miR-2429 | -22.6 | 441 |
| bta-miR-2429 | -17.7 | 608 |
| bta-miR-2429 | -14.5 | 174 |
| bta-miR-2429 | -13.6 | 598 |
| bta-miR-2429 | -13.5 | 68  |
| bta-miR-2429 | -13.0 | 222 |
| bta-miR-2429 | -11.8 | 506 |
| bta-miR-2429 | -11.8 | 479 |
| bta-miR-2429 | -11.0 | 371 |
| bta-miR-2429 | -11.0 | 423 |
| bta-miR-2429 | -10.9 | 622 |
| bta-miR-2429 | -10.3 | 268 |
| bta-miR-2429 | -10.0 | 83  |
| bta-miR-2430 | -28.7 | 576 |
| bta-miR-2430 | -28.4 | 462 |
| bta-miR-2430 | -28.3 | 99  |
| bta-miR-2430 | -28.1 | 402 |
| bta-miR-2430 | -27.4 | 342 |
| bta-miR-2430 | -25.8 | 176 |
| bta-miR-2430 | -25.6 | 619 |
| bta-miR-2430 | -25.1 | 237 |

|               |       |     |
|---------------|-------|-----|
| bta-miR-2430  | -23.7 | 505 |
| bta-miR-2430  | -23.6 | 69  |
| bta-miR-2430  | -23.3 | 14  |
| bta-miR-2430  | -22.2 | 134 |
| bta-miR-2430  | -21.5 | 309 |
| bta-miR-2430  | -19.9 | 558 |
| bta-miR-2430  | -19.9 | 425 |
| bta-miR-2430  | -17.8 | 709 |
| bta-miR-2430  | -17.6 | 204 |
| bta-miR-2430  | -17.5 | 262 |
| bta-miR-2430  | -16.8 | 693 |
| bta-miR-2430  | -14.5 | 57  |
| bta-miR-2430  | -14.5 | 662 |
| bta-miR-2430  | -14.4 | 381 |
| bta-miR-2430  | -13.9 | 167 |
| bta-miR-2430  | -13.6 | 486 |
| bta-miR-2430  | -13.2 | 640 |
| bta-miR-2430  | -12.9 | 3   |
| bta-miR-2430  | -12.6 | 281 |
| bta-miR-2430  | -12.2 | 451 |
| bta-miR-2430  | -11.6 | 600 |
| bta-miR-2430  | -11.2 | 741 |
| bta-miR-2430  | -10.6 | 51  |
| bta-miR-2430  | -10.4 | 436 |
| bta-miR-2430  | -10.2 | 330 |
| bta-miR-2430  | -10.1 | 540 |
| bta-miR-2430  | -10.1 | 682 |
| bta-miR-2431* | -20.2 | 623 |
| bta-miR-2431* | -19.8 | 353 |
| bta-miR-2431* | -19.3 | 130 |
| bta-miR-2431* | -18.9 | 533 |
| bta-miR-2431* | -18.3 | 416 |
| bta-miR-2431* | -18.3 | 648 |
| bta-miR-2431* | -18.1 | 9   |
| bta-miR-2431* | -17.6 | 579 |
| bta-miR-2431* | -17.3 | 52  |
| bta-miR-2431* | -17.0 | 95  |
| bta-miR-2431* | -16.7 | 274 |
| bta-miR-2431* | -16.7 | 466 |
| bta-miR-2431* | -16.6 | 377 |
| bta-miR-2431* | -16.1 | 233 |
| bta-miR-2431* | -16.0 | 689 |
| bta-miR-2431* | -15.7 | 513 |
| bta-miR-2431* | -15.6 | 166 |
| bta-miR-2431* | -15.3 | 314 |
| bta-miR-2431* | -15.0 | 115 |
| bta-miR-2431* | -15.0 | 559 |
| bta-miR-2431* | -14.8 | 488 |
| bta-miR-2431* | -12.4 | 715 |
| bta-miR-2431* | -11.9 | 429 |
| bta-miR-2431* | -11.7 | 24  |
| bta-miR-2431* | -11.4 | 205 |
| bta-miR-2431  | -33.7 | 597 |
| bta-miR-2431  | -30.2 | 67  |
| bta-miR-2431  | -26.6 | 480 |
| bta-miR-2431  | -24.7 | 421 |
| bta-miR-2431  | -24.0 | 620 |
| bta-miR-2431  | -22.8 | 14  |
| bta-miR-2431  | -19.6 | 252 |

|              |       |     |
|--------------|-------|-----|
| bta-miR-2431 | -16.3 | 165 |
| bta-miR-2431 | -15.8 | 393 |
| bta-miR-2431 | -14.8 | 573 |
| bta-miR-2431 | -13.9 | 654 |
| bta-miR-2431 | -13.5 | 100 |
| bta-miR-2431 | -13.1 | 215 |
| bta-miR-2431 | -12.4 | 518 |
| bta-miR-2431 | -12.1 | 368 |
| bta-miR-2431 | -12.0 | 349 |
| bta-miR-2431 | -11.6 | 532 |
| bta-miR-2431 | -11.5 | 277 |
| bta-miR-2431 | -10.4 | 379 |
| bta-miR-2431 | -10.2 | 742 |
| bta-miR-677  | -24.6 | 277 |
| bta-miR-677  | -23.8 | 238 |
| bta-miR-677  | -23.7 | 67  |
| bta-miR-677  | -23.7 | 614 |
| bta-miR-677  | -23.7 | 8   |
| bta-miR-677  | -21.4 | 558 |
| bta-miR-677  | -21.3 | 177 |
| bta-miR-677  | -21.3 | 479 |
| bta-miR-677  | -20.7 | 450 |
| bta-miR-677  | -19.6 | 100 |
| bta-miR-677  | -19.1 | 410 |
| bta-miR-677  | -17.3 | 44  |
| bta-miR-677  | -16.9 | 371 |
| bta-miR-677  | -16.6 | 737 |
| bta-miR-677  | -15.3 | 516 |
| bta-miR-677  | -14.6 | 577 |
| bta-miR-677  | -13.5 | 692 |
| bta-miR-677  | -13.4 | 206 |
| bta-miR-677  | -13.1 | 659 |
| bta-miR-677  | -13.0 | 338 |
| bta-miR-677  | -12.7 | 85  |
| bta-miR-677  | -12.3 | 548 |
| bta-miR-677  | -12.0 | 147 |
| bta-miR-677  | -11.8 | 391 |
| bta-miR-677  | -10.1 | 36  |
| bta-miR-677  | -10.0 | 303 |
| bta-miR-2432 | -27.9 | 473 |
| bta-miR-2432 | -27.2 | 73  |
| bta-miR-2432 | -27.0 | 415 |
| bta-miR-2432 | -23.7 | 210 |
| bta-miR-2432 | -23.1 | 563 |
| bta-miR-2432 | -22.0 | 361 |
| bta-miR-2432 | -20.7 | 109 |
| bta-miR-2432 | -19.3 | 162 |
| bta-miR-2432 | -19.0 | 283 |
| bta-miR-2432 | -17.4 | 595 |
| bta-miR-2432 | -16.7 | 192 |
| bta-miR-2432 | -16.6 | 691 |
| bta-miR-2432 | -16.3 | 3   |
| bta-miR-2432 | -15.7 | 57  |
| bta-miR-2432 | -15.3 | 650 |
| bta-miR-2432 | -15.1 | 455 |
| bta-miR-2432 | -14.4 | 30  |
| bta-miR-2432 | -14.3 | 242 |
| bta-miR-2432 | -14.2 | 520 |
| bta-miR-2432 | -14.1 | 341 |

|              |       |     |
|--------------|-------|-----|
| bta-miR-2432 | -13.8 | 261 |
| bta-miR-2432 | -12.6 | 49  |
| bta-miR-2432 | -12.5 | 719 |
| bta-miR-2432 | -12.4 | 636 |
| bta-miR-2432 | -12.3 | 406 |
| bta-miR-2432 | -12.0 | 149 |
| bta-miR-2432 | -12.0 | 437 |
| bta-miR-2432 | -10.8 | 510 |
| bta-miR-2432 | -10.6 | 97  |
| bta-miR-2433 | -33.4 | 4   |
| bta-miR-2433 | -25.8 | 207 |
| bta-miR-2433 | -25.6 | 384 |
| bta-miR-2433 | -25.5 | 544 |
| bta-miR-2433 | -25.1 | 459 |
| bta-miR-2433 | -25.0 | 107 |
| bta-miR-2433 | -24.3 | 53  |
| bta-miR-2433 | -24.2 | 342 |
| bta-miR-2433 | -23.2 | 258 |
| bta-miR-2433 | -23.0 | 566 |
| bta-miR-2433 | -21.9 | 297 |
| bta-miR-2433 | -21.7 | 484 |
| bta-miR-2433 | -19.6 | 81  |
| bta-miR-2433 | -19.1 | 596 |
| bta-miR-2433 | -18.3 | 657 |
| bta-miR-2433 | -17.0 | 328 |
| bta-miR-2433 | -16.7 | 144 |
| bta-miR-2433 | -16.0 | 629 |
| bta-miR-2433 | -15.5 | 38  |
| bta-miR-2433 | -15.4 | 522 |
| bta-miR-2433 | -15.0 | 170 |
| bta-miR-2433 | -14.1 | 692 |
| bta-miR-2433 | -14.0 | 582 |
| bta-miR-2433 | -12.9 | 369 |
| bta-miR-2433 | -12.6 | 280 |
| bta-miR-2433 | -11.6 | 740 |
| bta-miR-2433 | -10.8 | 199 |
| bta-miR-2433 | -10.5 | 681 |
| bta-miR-2434 | -20.5 | 20  |
| bta-miR-2434 | -19.1 | 353 |
| bta-miR-2434 | -18.0 | 239 |
| bta-miR-2434 | -17.6 | 149 |
| bta-miR-2434 | -17.2 | 100 |
| bta-miR-2434 | -16.7 | 122 |
| bta-miR-2434 | -16.6 | 168 |
| bta-miR-2434 | -16.2 | 199 |
| bta-miR-2434 | -15.0 | 493 |
| bta-miR-2434 | -14.9 | 301 |
| bta-miR-2434 | -14.8 | 329 |
| bta-miR-2434 | -14.4 | 420 |
| bta-miR-2434 | -14.1 | 271 |
| bta-miR-2434 | -14.1 | 449 |
| bta-miR-2434 | -13.7 | 368 |
| bta-miR-2434 | -13.5 | 141 |
| bta-miR-2434 | -13.5 | 473 |
| bta-miR-2434 | -13.3 | 320 |
| bta-miR-2434 | -13.1 | 38  |
| bta-miR-2434 | -13.1 | 593 |
| bta-miR-2434 | -12.6 | 185 |
| bta-miR-2434 | -12.4 | 573 |

|                 |       |     |
|-----------------|-------|-----|
| bta-miR-2434    | -11.4 | 405 |
| bta-miR-2434    | -11.3 | 255 |
| bta-miR-2434    | -11.0 | 90  |
| bta-miR-2434    | -10.9 | 436 |
| bta-miR-2434    | -10.9 | 705 |
| bta-miR-2434    | -10.8 | 620 |
| bta-miR-2434    | -10.6 | 338 |
| bta-miR-2434    | -10.5 | 557 |
| bta-miR-2434    | -10.2 | 628 |
| bta-miR-2434    | -10.2 | 324 |
| bta-miR-2434    | -10.1 | 379 |
| bta-miR-2434    | -10.0 | 654 |
| bta-miR-2435    | -20.6 | 473 |
| bta-miR-2435    | -18.8 | 429 |
| bta-miR-2435    | -17.7 | 8   |
| bta-miR-2435    | -17.3 | 331 |
| bta-miR-2435    | -17.1 | 200 |
| bta-miR-2435    | -15.9 | 67  |
| bta-miR-2435    | -15.7 | 606 |
| bta-miR-2435    | -15.6 | 237 |
| bta-miR-2435    | -14.9 | 276 |
| bta-miR-2435    | -14.6 | 172 |
| bta-miR-2435    | -13.7 | 449 |
| bta-miR-2435    | -13.5 | 126 |
| bta-miR-2435    | -13.3 | 572 |
| bta-miR-2435    | -12.4 | 669 |
| bta-miR-2435    | -12.2 | 30  |
| bta-miR-2435    | -12.2 | 408 |
| bta-miR-2435    | -12.2 | 698 |
| bta-miR-2435    | -11.9 | 520 |
| bta-miR-2435    | -11.6 | 350 |
| bta-miR-2435    | -11.6 | 381 |
| bta-miR-2435    | -11.4 | 51  |
| bta-miR-2435    | -10.7 | 220 |
| bta-miR-2435    | -10.1 | 299 |
| bta-miR-2435    | -10.1 | 109 |
| bta-miR-2436-5p | -32.4 | 395 |
| bta-miR-2436-5p | -30.5 | 86  |
| bta-miR-2436-5p | -29.8 | 361 |
| bta-miR-2436-5p | -28.2 | 563 |
| bta-miR-2436-5p | -27.4 | 244 |
| bta-miR-2436-5p | -26.9 | 30  |
| bta-miR-2436-5p | -25.4 | 51  |
| bta-miR-2436-5p | -24.7 | 167 |
| bta-miR-2436-5p | -24.4 | 457 |
| bta-miR-2436-5p | -23.9 | 511 |
| bta-miR-2436-5p | -23.0 | 4   |
| bta-miR-2436-5p | -22.7 | 425 |
| bta-miR-2436-5p | -21.5 | 624 |
| bta-miR-2436-5p | -20.9 | 126 |
| bta-miR-2436-5p | -18.7 | 211 |
| bta-miR-2436-5p | -17.9 | 324 |
| bta-miR-2436-5p | -17.9 | 716 |
| bta-miR-2436-5p | -16.6 | 596 |
| bta-miR-2436-5p | -15.9 | 283 |
| bta-miR-2436-5p | -15.0 | 669 |
| bta-miR-2436-5p | -14.7 | 488 |
| bta-miR-2436-5p | -14.4 | 537 |
| bta-miR-2436-5p | -14.0 | 199 |



|                 |       |     |
|-----------------|-------|-----|
| bta-miR-2436-5p | -12.0 | 345 |
| bta-miR-2436-5p | -11.6 | 383 |
| bta-miR-2436-5p | -10.4 | 119 |
| bta-miR-2436-5p | -10.0 | 313 |
| bta-miR-2436-3p | -34.0 | 598 |
| bta-miR-2436-3p | -28.9 | 448 |
| bta-miR-2436-3p | -25.4 | 408 |
| bta-miR-2436-3p | -23.7 | 71  |
| bta-miR-2436-3p | -20.8 | 15  |
| bta-miR-2436-3p | -20.6 | 266 |
| bta-miR-2436-3p | -20.4 | 622 |
| bta-miR-2436-3p | -16.6 | 172 |
| bta-miR-2436-3p | -16.5 | 494 |
| bta-miR-2436-3p | -15.7 | 113 |
| bta-miR-2436-3p | -14.0 | 217 |
| bta-miR-2436-3p | -12.7 | 566 |
| bta-miR-2436-3p | -12.4 | 199 |
| bta-miR-2436-3p | -12.1 | 356 |
| bta-miR-2436-3p | -12.0 | 542 |
| bta-miR-2436-3p | -10.9 | 741 |
| bta-miR-2436-3p | -10.7 | 154 |
| bta-miR-2436-3p | -10.4 | 240 |
| bta-miR-2284r   | -26.0 | 460 |
| bta-miR-2284r   | -23.5 | 60  |
| bta-miR-2284r   | -22.9 | 401 |
| bta-miR-2284r   | -22.2 | 97  |
| bta-miR-2284r   | -20.3 | 616 |
| bta-miR-2284r   | -19.7 | 235 |
| bta-miR-2284r   | -19.6 | 24  |
| bta-miR-2284r   | -17.7 | 173 |
| bta-miR-2284r   | -17.3 | 4   |
| bta-miR-2284r   | -17.1 | 490 |
| bta-miR-2284r   | -17.0 | 342 |
| bta-miR-2284r   | -16.8 | 566 |
| bta-miR-2284r   | -16.7 | 596 |
| bta-miR-2284r   | -15.9 | 364 |
| bta-miR-2284r   | -15.3 | 692 |
| bta-miR-2284r   | -15.1 | 140 |
| bta-miR-2284r   | -15.1 | 650 |
| bta-miR-2284r   | -14.4 | 437 |
| bta-miR-2284r   | -14.1 | 730 |
| bta-miR-2284r   | -13.0 | 309 |
| bta-miR-2284r   | -12.9 | 204 |
| bta-miR-2284r   | -12.6 | 277 |
| bta-miR-2284r   | -11.8 | 541 |
| bta-miR-2284r   | -11.2 | 126 |
| bta-miR-2284r   | -10.6 | 51  |
| bta-miR-2284r   | -10.3 | 119 |
| bta-miR-2437    | -19.9 | 218 |
| bta-miR-2437    | -19.2 | 611 |
| bta-miR-2437    | -18.8 | 102 |
| bta-miR-2437    | -18.8 | 445 |
| bta-miR-2437    | -16.7 | 174 |
| bta-miR-2437    | -16.3 | 371 |
| bta-miR-2437    | -15.7 | 479 |
| bta-miR-2437    | -15.4 | 16  |
| bta-miR-2437    | -14.9 | 268 |
| bta-miR-2437    | -14.6 | 41  |
| bta-miR-2437    | -13.5 | 153 |

|               |       |     |
|---------------|-------|-----|
| bta-miR-2437  | -13.0 | 65  |
| bta-miR-2437  | -12.7 | 350 |
| bta-miR-2437  | -12.5 | 333 |
| bta-miR-2437  | -12.5 | 202 |
| bta-miR-2437  | -12.4 | 598 |
| bta-miR-2437  | -12.0 | 405 |
| bta-miR-2437  | -11.9 | 557 |
| bta-miR-2437  | -11.9 | 414 |
| bta-miR-2437  | -11.8 | 124 |
| bta-miR-2437  | -11.5 | 631 |
| bta-miR-2437  | -11.5 | 736 |
| bta-miR-2437  | -11.3 | 312 |
| bta-miR-2437  | -10.3 | 710 |
| bta-miR-2437  | -10.3 | 574 |
| bta-miR-2437  | -10.1 | 79  |
| bta-miR-2437  | -10.0 | 464 |
| bta-miR-2438  | -30.9 | 8   |
| bta-miR-2438  | -30.7 | 108 |
| bta-miR-2438  | -28.8 | 154 |
| bta-miR-2438  | -27.0 | 407 |
| bta-miR-2438  | -26.8 | 450 |
| bta-miR-2438  | -26.5 | 575 |
| bta-miR-2438  | -26.4 | 68  |
| bta-miR-2438  | -25.4 | 232 |
| bta-miR-2438  | -23.1 | 37  |
| bta-miR-2438  | -23.1 | 605 |
| bta-miR-2438  | -22.4 | 316 |
| bta-miR-2438  | -22.1 | 494 |
| bta-miR-2438  | -21.8 | 270 |
| bta-miR-2438  | -21.6 | 358 |
| bta-miR-2438  | -20.5 | 198 |
| bta-miR-2438  | -18.7 | 389 |
| bta-miR-2438  | -18.7 | 479 |
| bta-miR-2438  | -18.7 | 631 |
| bta-miR-2438  | -16.7 | 555 |
| bta-miR-2438  | -15.2 | 139 |
| bta-miR-2438  | -13.1 | 344 |
| bta-miR-2438  | -12.8 | 687 |
| bta-miR-2438  | -12.2 | 98  |
| bta-miR-2438  | -11.7 | 249 |
| bta-miR-2438  | -11.2 | 737 |
| bta-miR-2438  | -10.0 | 263 |
| bta-miR-2439* | -30.7 | 1   |
| bta-miR-2439* | -24.0 | 404 |
| bta-miR-2439* | -23.9 | 240 |
| bta-miR-2439* | -23.8 | 450 |
| bta-miR-2439* | -22.7 | 93  |
| bta-miR-2439* | -22.1 | 69  |
| bta-miR-2439* | -21.9 | 598 |
| bta-miR-2439* | -21.9 | 202 |
| bta-miR-2439* | -20.8 | 119 |
| bta-miR-2439* | -20.3 | 350 |
| bta-miR-2439* | -19.3 | 615 |
| bta-miR-2439* | -19.1 | 165 |
| bta-miR-2439* | -18.8 | 40  |
| bta-miR-2439* | -18.7 | 565 |
| bta-miR-2439* | -18.1 | 499 |
| bta-miR-2439* | -16.2 | 147 |
| bta-miR-2439* | -15.9 | 655 |

|               |       |     |
|---------------|-------|-----|
| bta-miR-2439* | -15.5 | 26  |
| bta-miR-2439* | -14.7 | 298 |
| bta-miR-2439* | -14.5 | 425 |
| bta-miR-2439* | -13.2 | 384 |
| bta-miR-2439* | -13.1 | 177 |
| bta-miR-2439* | -11.7 | 524 |
| bta-miR-2439* | -11.2 | 730 |
| bta-miR-2439* | -10.6 | 580 |
| bta-miR-2439* | -10.5 | 228 |
| bta-miR-2439* | -10.3 | 438 |
| bta-miR-2439* | -10.2 | 548 |
| bta-miR-2439  | -27.7 | 561 |
| bta-miR-2439  | -23.3 | 425 |
| bta-miR-2439  | -21.0 | 206 |
| bta-miR-2439  | -19.7 | 81  |
| bta-miR-2439  | -19.5 | 360 |
| bta-miR-2439  | -18.4 | 398 |
| bta-miR-2439  | -18.3 | 666 |
| bta-miR-2439  | -18.3 | 5   |
| bta-miR-2439  | -17.8 | 51  |
| bta-miR-2439  | -17.4 | 519 |
| bta-miR-2439  | -16.5 | 117 |
| bta-miR-2439  | -16.2 | 244 |
| bta-miR-2439  | -16.1 | 695 |
| bta-miR-2439  | -15.6 | 457 |
| bta-miR-2439  | -15.3 | 307 |
| bta-miR-2439  | -15.1 | 167 |
| bta-miR-2439  | -14.9 | 491 |
| bta-miR-2439  | -14.9 | 624 |
| bta-miR-2439  | -14.0 | 740 |
| bta-miR-2439  | -13.9 | 291 |
| bta-miR-2439  | -13.7 | 30  |
| bta-miR-2439  | -13.4 | 271 |
| bta-miR-2439  | -12.3 | 341 |
| bta-miR-2439  | -11.4 | 109 |
| bta-miR-2439  | -11.3 | 132 |
| bta-miR-2439  | -10.4 | 654 |
| bta-miR-2439  | -10.3 | 257 |
| bta-miR-2439  | -10.3 | 483 |
| bta-miR-2439  | -10.0 | 547 |
| bta-miR-2439  | -10.0 | 156 |
| bta-miR-2440  | -25.7 | 572 |
| bta-miR-2440  | -22.0 | 476 |
| bta-miR-2440  | -20.8 | 34  |
| bta-miR-2440  | -19.4 | 409 |
| bta-miR-2440  | -18.4 | 514 |
| bta-miR-2440  | -18.3 | 391 |
| bta-miR-2440  | -18.0 | 619 |
| bta-miR-2440  | -17.9 | 173 |
| bta-miR-2440  | -17.8 | 259 |
| bta-miR-2440  | -17.3 | 83  |
| bta-miR-2440  | -16.7 | 111 |
| bta-miR-2440  | -16.4 | 127 |
| bta-miR-2440  | -15.8 | 542 |
| bta-miR-2440  | -15.8 | 596 |
| bta-miR-2440  | -14.8 | 286 |
| bta-miR-2440  | -14.6 | 657 |
| bta-miR-2440  | -14.5 | 14  |
| bta-miR-2440  | -14.2 | 236 |

|              |       |     |
|--------------|-------|-----|
| bta-miR-2440 | -13.7 | 447 |
| bta-miR-2440 | -13.5 | 190 |
| bta-miR-2440 | -13.5 | 70  |
| bta-miR-2440 | -12.9 | 143 |
| bta-miR-2440 | -12.2 | 461 |
| bta-miR-2440 | -12.2 | 368 |
| bta-miR-2440 | -12.1 | 740 |
| bta-miR-2440 | -12.1 | 342 |
| bta-miR-2440 | -11.9 | 502 |
| bta-miR-2440 | -11.6 | 4   |
| bta-miR-2440 | -11.5 | 98  |
| bta-miR-2440 | -11.5 | 613 |
| bta-miR-2440 | -10.2 | 211 |
| bta-miR-2440 | -10.2 | 692 |
| bta-miR-2441 | -26.8 | 401 |
| bta-miR-2441 | -25.0 | 561 |
| bta-miR-2441 | -24.4 | 86  |
| bta-miR-2441 | -21.2 | 512 |
| bta-miR-2441 | -21.0 | 354 |
| bta-miR-2441 | -20.9 | 246 |
| bta-miR-2441 | -19.6 | 190 |
| bta-miR-2441 | -19.0 | 384 |
| bta-miR-2441 | -18.0 | 135 |
| bta-miR-2441 | -17.9 | 466 |
| bta-miR-2441 | -17.6 | 1   |
| bta-miR-2441 | -17.5 | 33  |
| bta-miR-2441 | -17.5 | 110 |
| bta-miR-2441 | -16.8 | 655 |
| bta-miR-2441 | -15.7 | 330 |
| bta-miR-2441 | -15.2 | 55  |
| bta-miR-2441 | -14.6 | 276 |
| bta-miR-2441 | -14.5 | 316 |
| bta-miR-2441 | -14.4 | 625 |
| bta-miR-2441 | -14.2 | 492 |
| bta-miR-2441 | -13.9 | 163 |
| bta-miR-2441 | -13.5 | 545 |
| bta-miR-2441 | -13.0 | 693 |
| bta-miR-2441 | -12.0 | 670 |
| bta-miR-2441 | -11.8 | 232 |
| bta-miR-2441 | -11.5 | 457 |
| bta-miR-2441 | -11.4 | 262 |
| bta-miR-2441 | -11.3 | 739 |
| bta-miR-2441 | -10.5 | 17  |
| bta-miR-2441 | -10.2 | 715 |
| bta-miR-2441 | -10.0 | 299 |
| bta-miR-2442 | -31.4 | 86  |
| bta-miR-2442 | -30.1 | 231 |
| bta-miR-2442 | -26.9 | 17  |
| bta-miR-2442 | -26.7 | 404 |
| bta-miR-2442 | -26.6 | 356 |
| bta-miR-2442 | -26.2 | 463 |
| bta-miR-2442 | -26.1 | 560 |
| bta-miR-2442 | -25.5 | 156 |
| bta-miR-2442 | -25.4 | 493 |
| bta-miR-2442 | -23.9 | 199 |
| bta-miR-2442 | -23.3 | 40  |
| bta-miR-2442 | -23.1 | 126 |
| bta-miR-2442 | -22.2 | 614 |
| bta-miR-2442 | -20.8 | 267 |

|               |       |     |
|---------------|-------|-----|
| bta-miR-2442  | -20.7 | 319 |
| bta-miR-2442  | -17.9 | 480 |
| bta-miR-2442  | -17.6 | 293 |
| bta-miR-2442  | -17.6 | 183 |
| bta-miR-2442  | -17.3 | 64  |
| bta-miR-2442  | -17.2 | 660 |
| bta-miR-2442  | -16.3 | 631 |
| bta-miR-2442  | -15.5 | 697 |
| bta-miR-2442  | -15.0 | 526 |
| bta-miR-2442  | -14.4 | 258 |
| bta-miR-2442  | -14.3 | 1   |
| bta-miR-2442  | -13.8 | 393 |
| bta-miR-2442  | -13.1 | 449 |
| bta-miR-2442  | -12.6 | 737 |
| bta-miR-2442  | -12.3 | 591 |
| bta-miR-2442  | -11.3 | 120 |
| bta-miR-2442  | -10.4 | 435 |
| bta-miR-2443  | -28.7 | 415 |
| bta-miR-2443  | -24.9 | 654 |
| bta-miR-2443  | -24.2 | 73  |
| bta-miR-2443  | -22.8 | 563 |
| bta-miR-2443  | -22.6 | 261 |
| bta-miR-2443  | -22.6 | 30  |
| bta-miR-2443  | -22.4 | 306 |
| bta-miR-2443  | -21.9 | 473 |
| bta-miR-2443  | -21.5 | 206 |
| bta-miR-2443  | -20.8 | 160 |
| bta-miR-2443  | -20.5 | 593 |
| bta-miR-2443  | -20.0 | 383 |
| bta-miR-2443  | -19.6 | 353 |
| bta-miR-2443  | -18.6 | 494 |
| bta-miR-2443  | -17.9 | 698 |
| bta-miR-2443  | -16.8 | 119 |
| bta-miR-2443  | -16.8 | 529 |
| bta-miR-2443  | -15.2 | 1   |
| bta-miR-2443  | -15.0 | 283 |
| bta-miR-2443  | -14.6 | 457 |
| bta-miR-2443  | -13.5 | 741 |
| bta-miR-2443  | -12.9 | 629 |
| bta-miR-2443  | -12.4 | 59  |
| bta-miR-2443  | -11.6 | 139 |
| bta-miR-2443  | -11.3 | 247 |
| bta-miR-2443  | -10.6 | 328 |
| bta-miR-2443  | -10.3 | 150 |
| bta-miR-2443  | -10.3 | 408 |
| bta-miR-2443  | -10.2 | 673 |
| bta-miR-2284h | -19.6 | 166 |
| bta-miR-2284h | -19.1 | 60  |
| bta-miR-2284h | -19.1 | 616 |
| bta-miR-2284h | -18.6 | 429 |
| bta-miR-2284h | -18.5 | 242 |
| bta-miR-2284h | -18.1 | 406 |
| bta-miR-2284h | -17.6 | 366 |
| bta-miR-2284h | -16.8 | 460 |
| bta-miR-2284h | -16.4 | 490 |
| bta-miR-2284h | -16.3 | 327 |
| bta-miR-2284h | -16.1 | 595 |
| bta-miR-2284h | -15.9 | 108 |
| bta-miR-2284h | -15.0 | 273 |

|                |       |     |
|----------------|-------|-----|
| bta-miR-2284h  | -15.0 | 197 |
| bta-miR-2284h  | -14.4 | 689 |
| bta-miR-2284h  | -14.4 | 28  |
| bta-miR-2284h  | -14.2 | 508 |
| bta-miR-2284h  | -13.7 | 11  |
| bta-miR-2284h  | -13.2 | 306 |
| bta-miR-2284h  | -11.8 | 91  |
| bta-miR-2284h  | -11.6 | 229 |
| bta-miR-2284h  | -11.5 | 581 |
| bta-miR-2284h  | -11.4 | 725 |
| bta-miR-2284h  | -11.4 | 669 |
| bta-miR-2284h  | -11.2 | 124 |
| bta-miR-2284h  | -11.2 | 451 |
| bta-miR-2284h  | -10.7 | 558 |
| bta-miR-2284h  | -10.7 | 648 |
| bta-miR-2284h  | -10.3 | 320 |
| bta-miR-2284h  | -10.2 | 635 |
| bta-miR-2284h* | -28.5 | 614 |
| bta-miR-2284h* | -23.7 | 44  |
| bta-miR-2284h* | -22.4 | 464 |
| bta-miR-2284h* | -21.1 | 252 |
| bta-miR-2284h* | -20.3 | 436 |
| bta-miR-2284h* | -18.5 | 576 |
| bta-miR-2284h* | -18.2 | 73  |
| bta-miR-2284h* | -17.8 | 8   |
| bta-miR-2284h* | -17.5 | 395 |
| bta-miR-2284h* | -16.7 | 277 |
| bta-miR-2284h* | -15.8 | 482 |
| bta-miR-2284h* | -15.7 | 645 |
| bta-miR-2284h* | -15.3 | 147 |
| bta-miR-2284h* | -13.7 | 97  |
| bta-miR-2284h* | -13.6 | 525 |
| bta-miR-2284h* | -13.1 | 20  |
| bta-miR-2284h* | -13.0 | 202 |
| bta-miR-2284h* | -12.5 | 551 |
| bta-miR-2284h* | -12.5 | 235 |
| bta-miR-2284h* | -12.2 | 453 |
| bta-miR-2284h* | -11.9 | 692 |
| bta-miR-2284h* | -11.4 | 419 |
| bta-miR-2284h* | -11.4 | 735 |
| bta-miR-2284h* | -11.3 | 604 |
| bta-miR-2284h* | -10.9 | 121 |
| bta-miR-2284h* | -10.8 | 371 |
| bta-miR-2444   | -17.8 | 196 |
| bta-miR-2444   | -16.3 | 100 |
| bta-miR-2444   | -14.7 | 371 |
| bta-miR-2444   | -14.5 | 149 |
| bta-miR-2444   | -14.0 | 338 |
| bta-miR-2444   | -13.8 | 171 |
| bta-miR-2444   | -13.3 | 592 |
| bta-miR-2444   | -12.7 | 221 |
| bta-miR-2444   | -11.9 | 65  |
| bta-miR-2444   | -11.8 | 726 |
| bta-miR-2444   | -11.7 | 444 |
| bta-miR-2444   | -11.5 | 46  |
| bta-miR-2444   | -11.1 | 470 |
| bta-miR-2444   | -10.9 | 405 |
| bta-miR-2444   | -10.3 | 268 |
| bta-miR-2445   | -29.5 | 440 |

|              |       |     |
|--------------|-------|-----|
| bta-miR-2445 | -23.1 | 222 |
| bta-miR-2445 | -20.4 | 608 |
| bta-miR-2445 | -16.7 | 348 |
| bta-miR-2445 | -16.7 | 174 |
| bta-miR-2445 | -15.6 | 101 |
| bta-miR-2445 | -14.7 | 405 |
| bta-miR-2445 | -14.5 | 36  |
| bta-miR-2445 | -14.2 | 470 |
| bta-miR-2445 | -13.1 | 731 |
| bta-miR-2445 | -13.0 | 68  |
| bta-miR-2445 | -12.6 | 196 |
| bta-miR-2445 | -12.2 | 11  |
| bta-miR-2445 | -11.8 | 124 |
| bta-miR-2445 | -11.5 | 268 |
| bta-miR-2445 | -11.5 | 499 |
| bta-miR-2445 | -10.4 | 557 |
| bta-miR-2445 | -10.3 | 598 |
| bta-miR-2445 | -10.2 | 570 |
| bta-miR-2445 | -10.1 | 153 |
| bta-miR-2445 | -10.1 | 652 |
| bta-miR-2445 | -10.0 | 166 |
| bta-miR-2446 | -17.0 | 361 |
| bta-miR-2446 | -16.2 | 12  |
| bta-miR-2446 | -15.7 | 461 |
| bta-miR-2446 | -15.0 | 30  |
| bta-miR-2446 | -14.4 | 429 |
| bta-miR-2446 | -14.2 | 308 |
| bta-miR-2446 | -14.2 | 91  |
| bta-miR-2446 | -13.9 | 167 |
| bta-miR-2446 | -13.4 | 72  |
| bta-miR-2446 | -12.9 | 623 |
| bta-miR-2446 | -12.9 | 244 |
| bta-miR-2446 | -12.8 | 482 |
| bta-miR-2446 | -12.7 | 566 |
| bta-miR-2446 | -12.6 | 669 |
| bta-miR-2446 | -12.5 | 109 |
| bta-miR-2446 | -12.1 | 414 |
| bta-miR-2446 | -11.8 | 514 |
| bta-miR-2446 | -11.6 | 715 |
| bta-miR-2446 | -11.5 | 142 |
| bta-miR-2446 | -11.4 | 596 |
| bta-miR-2446 | -11.1 | 342 |
| bta-miR-2446 | -10.8 | 402 |
| bta-miR-2446 | -10.7 | 119 |
| bta-miR-2446 | -10.7 | 270 |
| bta-miR-2446 | -10.5 | 51  |
| bta-miR-2446 | -10.4 | 532 |
| bta-miR-2446 | -10.4 | 235 |
| bta-miR-2446 | -10.2 | 659 |
| bta-miR-2446 | -10.2 | 473 |
| bta-miR-2446 | -10.1 | 740 |
| bta-miR-2446 | -10.1 | 155 |
| bta-miR-2446 | -10.0 | 424 |
| bta-miR-2447 | -31.9 | 411 |
| bta-miR-2447 | -29.6 | 453 |
| bta-miR-2447 | -26.3 | 559 |
| bta-miR-2447 | -26.2 | 479 |
| bta-miR-2447 | -25.9 | 115 |
| bta-miR-2447 | -23.0 | 155 |

|               |       |     |
|---------------|-------|-----|
| bta-miR-2447  | -22.6 | 83  |
| bta-miR-2447  | -22.3 | 4   |
| bta-miR-2447  | -21.5 | 205 |
| bta-miR-2447  | -21.3 | 584 |
| bta-miR-2447  | -20.6 | 653 |
| bta-miR-2447  | -19.8 | 41  |
| bta-miR-2447  | -19.8 | 737 |
| bta-miR-2447  | -19.4 | 264 |
| bta-miR-2447  | -18.3 | 606 |
| bta-miR-2447  | -17.4 | 358 |
| bta-miR-2447  | -16.5 | 698 |
| bta-miR-2447  | -16.2 | 508 |
| bta-miR-2447  | -16.2 | 376 |
| bta-miR-2447  | -16.0 | 243 |
| bta-miR-2447  | -15.9 | 308 |
| bta-miR-2447  | -15.6 | 337 |
| bta-miR-2447  | -14.3 | 393 |
| bta-miR-2447  | -13.7 | 172 |
| bta-miR-2447  | -12.6 | 107 |
| bta-miR-2447  | -11.6 | 327 |
| bta-miR-2447  | -11.3 | 198 |
| bta-miR-2447  | -11.2 | 136 |
| bta-miR-2447  | -11.0 | 435 |
| bta-miR-2447  | -11.0 | 472 |
| bta-miR-2447  | -10.9 | 282 |
| bta-miR-2447  | -10.2 | 632 |
| bta-miR-2447  | -10.1 | 520 |
| bta-miR-2447  | -10.1 | 70  |
| bta-miR-2448* | -20.2 | 543 |
| bta-miR-2448* | -19.2 | 462 |
| bta-miR-2448* | -18.2 | 409 |
| bta-miR-2448* | -17.3 | 81  |
| bta-miR-2448* | -16.2 | 25  |
| bta-miR-2448* | -15.9 | 497 |
| bta-miR-2448* | -15.8 | 658 |
| bta-miR-2448* | -14.8 | 518 |
| bta-miR-2448* | -14.8 | 362 |
| bta-miR-2448* | -14.7 | 741 |
| bta-miR-2448* | -14.1 | 3   |
| bta-miR-2448* | -14.0 | 564 |
| bta-miR-2448* | -13.8 | 248 |
| bta-miR-2448* | -13.8 | 614 |
| bta-miR-2448* | -12.5 | 113 |
| bta-miR-2448* | -12.5 | 266 |
| bta-miR-2448* | -12.3 | 707 |
| bta-miR-2448* | -12.2 | 231 |
| bta-miR-2448* | -12.0 | 12  |
| bta-miR-2448* | -11.4 | 187 |
| bta-miR-2448* | -11.3 | 685 |
| bta-miR-2448* | -11.1 | 598 |
| bta-miR-2448* | -10.6 | 66  |
| bta-miR-2448* | -10.1 | 342 |
| bta-miR-2448  | -28.6 | 109 |
| bta-miR-2448  | -24.9 | 473 |
| bta-miR-2448  | -23.3 | 501 |
| bta-miR-2448  | -22.3 | 624 |
| bta-miR-2448  | -22.2 | 230 |
| bta-miR-2448  | -21.2 | 33  |
| bta-miR-2448  | -20.7 | 324 |



|               |       |     |
|---------------|-------|-----|
| bta-miR-2448  | -20.5 | 361 |
| bta-miR-2448  | -19.9 | 135 |
| bta-miR-2448  | -19.4 | 167 |
| bta-miR-2448  | -19.0 | 429 |
| bta-miR-2448  | -18.4 | 275 |
| bta-miR-2448  | -17.6 | 563 |
| bta-miR-2448  | -16.4 | 586 |
| bta-miR-2448  | -16.2 | 384 |
| bta-miR-2448  | -15.6 | 702 |
| bta-miR-2448  | -15.3 | 305 |
| bta-miR-2448  | -15.0 | 91  |
| bta-miR-2448  | -14.7 | 247 |
| bta-miR-2448  | -13.4 | 67  |
| bta-miR-2448  | -13.2 | 662 |
| bta-miR-2448  | -13.1 | 14  |
| bta-miR-2448  | -12.5 | 192 |
| bta-miR-2448  | -11.5 | 416 |
| bta-miR-2448  | -11.0 | 1   |
| bta-miR-2448  | -10.9 | 734 |
| bta-miR-2449  | -31.3 | 408 |
| bta-miR-2449  | -28.1 | 563 |
| bta-miR-2449  | -25.2 | 73  |
| bta-miR-2449  | -25.1 | 109 |
| bta-miR-2449  | -23.4 | 386 |
| bta-miR-2449  | -22.9 | 167 |
| bta-miR-2449  | -22.0 | 244 |
| bta-miR-2449  | -22.0 | 361 |
| bta-miR-2449  | -21.7 | 30  |
| bta-miR-2449  | -19.8 | 520 |
| bta-miR-2449  | -19.0 | 4   |
| bta-miR-2449  | -19.0 | 461 |
| bta-miR-2449  | -18.9 | 683 |
| bta-miR-2449  | -18.9 | 624 |
| bta-miR-2449  | -18.7 | 654 |
| bta-miR-2449  | -18.4 | 308 |
| bta-miR-2449  | -18.0 | 488 |
| bta-miR-2449  | -15.3 | 283 |
| bta-miR-2449  | -15.2 | 132 |
| bta-miR-2449  | -14.8 | 206 |
| bta-miR-2449  | -14.5 | 58  |
| bta-miR-2449  | -14.1 | 547 |
| bta-miR-2449  | -12.7 | 738 |
| bta-miR-2449  | -12.1 | 235 |
| bta-miR-2449  | -12.0 | 330 |
| bta-miR-2449  | -11.6 | 707 |
| bta-miR-2449  | -10.8 | 587 |
| bta-miR-2449  | -10.2 | 432 |
| bta-miR-2450c | -23.6 | 420 |
| bta-miR-2450c | -23.4 | 353 |
| bta-miR-2450c | -21.6 | 382 |
| bta-miR-2450c | -21.1 | 199 |
| bta-miR-2450c | -21.0 | 469 |
| bta-miR-2450c | -20.7 | 563 |
| bta-miR-2450c | -20.5 | 106 |
| bta-miR-2450c | -20.2 | 160 |
| bta-miR-2450c | -19.0 | 22  |
| bta-miR-2450c | -18.8 | 66  |
| bta-miR-2450c | -18.6 | 256 |
| bta-miR-2450c | -18.5 | 602 |

|               |       |     |
|---------------|-------|-----|
| bta-miR-2450c | -16.8 | 278 |
| bta-miR-2450c | -16.1 | 518 |
| bta-miR-2450c | -15.7 | 654 |
| bta-miR-2450c | -15.3 | 307 |
| bta-miR-2450c | -14.9 | 488 |
| bta-miR-2450c | -14.6 | 3   |
| bta-miR-2450c | -14.3 | 739 |
| bta-miR-2450c | -13.9 | 122 |
| bta-miR-2450c | -13.2 | 686 |
| bta-miR-2450c | -13.1 | 244 |
| bta-miR-2450c | -12.3 | 51  |
| bta-miR-2450c | -12.1 | 137 |
| bta-miR-2450c | -11.9 | 545 |
| bta-miR-2450c | -11.7 | 708 |
| bta-miR-2450c | -11.1 | 635 |
| bta-miR-2450c | -10.9 | 326 |
| bta-miR-2450b | -24.4 | 473 |
| bta-miR-2450b | -23.6 | 199 |
| bta-miR-2450b | -23.4 | 106 |
| bta-miR-2450b | -23.2 | 560 |
| bta-miR-2450b | -22.7 | 353 |
| bta-miR-2450b | -21.9 | 379 |
| bta-miR-2450b | -21.5 | 577 |
| bta-miR-2450b | -20.0 | 22  |
| bta-miR-2450b | -19.8 | 66  |
| bta-miR-2450b | -17.9 | 256 |
| bta-miR-2450b | -17.8 | 420 |
| bta-miR-2450b | -17.7 | 172 |
| bta-miR-2450b | -17.5 | 488 |
| bta-miR-2450b | -17.4 | 631 |
| bta-miR-2450b | -17.1 | 304 |
| bta-miR-2450b | -16.7 | 686 |
| bta-miR-2450b | -16.6 | 122 |
| bta-miR-2450b | -15.0 | 654 |
| bta-miR-2450b | -14.9 | 278 |
| bta-miR-2450b | -14.2 | 3   |
| bta-miR-2450b | -14.2 | 531 |
| bta-miR-2450b | -13.8 | 56  |
| bta-miR-2450b | -13.6 | 326 |
| bta-miR-2450b | -13.3 | 729 |
| bta-miR-2450b | -13.3 | 148 |
| bta-miR-2450b | -13.1 | 244 |
| bta-miR-2450b | -12.4 | 594 |
| bta-miR-2450b | -12.1 | 91  |
| bta-miR-2450b | -11.5 | 457 |
| bta-miR-2450b | -10.6 | 621 |
| bta-miR-2450b | -10.2 | 411 |
| bta-miR-2450b | -10.0 | 231 |
| bta-miR-2450a | -26.7 | 106 |
| bta-miR-2450a | -23.3 | 546 |
| bta-miR-2450a | -23.1 | 66  |
| bta-miR-2450a | -23.1 | 415 |
| bta-miR-2450a | -21.8 | 473 |
| bta-miR-2450a | -21.5 | 199 |
| bta-miR-2450a | -21.0 | 20  |
| bta-miR-2450a | -20.7 | 379 |
| bta-miR-2450a | -19.7 | 148 |
| bta-miR-2450a | -19.5 | 353 |
| bta-miR-2450a | -19.3 | 573 |

|               |       |     |
|---------------|-------|-----|
| bta-miR-2450a | -18.5 | 304 |
| bta-miR-2450a | -18.3 | 631 |
| bta-miR-2450a | -17.9 | 244 |
| bta-miR-2450a | -17.9 | 518 |
| bta-miR-2450a | -17.8 | 126 |
| bta-miR-2450a | -17.6 | 686 |
| bta-miR-2450a | -16.9 | 654 |
| bta-miR-2450a | -16.8 | 278 |
| bta-miR-2450a | -16.4 | 39  |
| bta-miR-2450a | -14.8 | 92  |
| bta-miR-2450a | -14.7 | 172 |
| bta-miR-2450a | -14.5 | 494 |
| bta-miR-2450a | -13.4 | 231 |
| bta-miR-2450a | -12.9 | 3   |
| bta-miR-2450a | -12.8 | 602 |
| bta-miR-2450a | -12.6 | 457 |
| bta-miR-2450a | -11.9 | 739 |
| bta-miR-2450a | -11.2 | 261 |
| bta-miR-2450a | -11.1 | 327 |
| bta-miR-2450a | -10.0 | 702 |
| bta-miR-2451  | -26.0 | 259 |
| bta-miR-2451  | -25.3 | 185 |
| bta-miR-2451  | -23.4 | 467 |
| bta-miR-2451  | -23.4 | 90  |
| bta-miR-2451  | -22.3 | 136 |
| bta-miR-2451  | -22.0 | 624 |
| bta-miR-2451  | -21.9 | 55  |
| bta-miR-2451  | -21.8 | 572 |
| bta-miR-2451  | -21.3 | 236 |
| bta-miR-2451  | -20.9 | 391 |
| bta-miR-2451  | -19.2 | 537 |
| bta-miR-2451  | -18.9 | 317 |
| bta-miR-2451  | -18.8 | 342 |
| bta-miR-2451  | -18.6 | 510 |
| bta-miR-2451  | -18.2 | 5   |
| bta-miR-2451  | -17.0 | 283 |
| bta-miR-2451  | -16.8 | 491 |
| bta-miR-2451  | -16.4 | 690 |
| bta-miR-2451  | -15.3 | 454 |
| bta-miR-2451  | -14.5 | 363 |
| bta-miR-2451  | -14.4 | 655 |
| bta-miR-2451  | -14.3 | 116 |
| bta-miR-2451  | -14.2 | 715 |
| bta-miR-2451  | -13.0 | 169 |
| bta-miR-2451  | -12.8 | 213 |
| bta-miR-2451  | -12.7 | 30  |
| bta-miR-2451  | -12.5 | 559 |
| bta-miR-2451  | -12.3 | 431 |
| bta-miR-2451  | -12.0 | 603 |
| bta-miR-2451  | -11.2 | 83  |
| bta-miR-2451  | -10.4 | 437 |
| bta-miR-2451  | -10.2 | 615 |
| bta-miR-1777a | -36.5 | 317 |
| bta-miR-1777a | -33.4 | 237 |
| bta-miR-1777a | -32.7 | 117 |
| bta-miR-1777a | -28.7 | 564 |
| bta-miR-1777a | -27.0 | 2   |
| bta-miR-1777a | -26.8 | 461 |
| bta-miR-1777a | -26.0 | 163 |

|               |       |     |
|---------------|-------|-----|
| bta-miR-1777a | -25.5 | 87  |
| bta-miR-1777a | -23.4 | 386 |
| bta-miR-1777a | -23.1 | 511 |
| bta-miR-1777a | -22.8 | 342 |
| bta-miR-1777a | -20.9 | 291 |
| bta-miR-1777a | -19.4 | 43  |
| bta-miR-1777a | -19.1 | 271 |
| bta-miR-1777a | -17.5 | 582 |
| bta-miR-1777a | -15.7 | 199 |
| bta-miR-1777a | -15.5 | 624 |
| bta-miR-1777a | -15.4 | 695 |
| bta-miR-1777a | -15.0 | 642 |
| bta-miR-1777a | -14.6 | 483 |
| bta-miR-1777a | -14.1 | 740 |
| bta-miR-1777a | -13.5 | 537 |
| bta-miR-1777a | -13.5 | 368 |
| bta-miR-1777a | -11.9 | 146 |
| bta-miR-1777a | -11.6 | 66  |
| bta-miR-2452  | -20.9 | 442 |
| bta-miR-2452  | -20.6 | 608 |
| bta-miR-2452  | -19.6 | 225 |
| bta-miR-2452  | -18.9 | 174 |
| bta-miR-2452  | -18.8 | 479 |
| bta-miR-2452  | -18.1 | 153 |
| bta-miR-2452  | -15.9 | 506 |
| bta-miR-2452  | -15.2 | 371 |
| bta-miR-2452  | -15.0 | 102 |
| bta-miR-2452  | -14.7 | 268 |
| bta-miR-2452  | -14.2 | 16  |
| bta-miR-2452  | -13.9 | 630 |
| bta-miR-2452  | -13.8 | 350 |
| bta-miR-2452  | -13.7 | 65  |
| bta-miR-2452  | -12.6 | 724 |
| bta-miR-2452  | -11.8 | 36  |
| bta-miR-2452  | -11.7 | 598 |
| bta-miR-2452  | -11.0 | 405 |
| bta-miR-2452  | -10.7 | 128 |
| bta-miR-2452  | -10.6 | 334 |
| bta-miR-2452  | -10.5 | 79  |
| bta-miR-2452  | -10.4 | 218 |
| bta-miR-2452  | -10.2 | 574 |
| bta-miR-2453  | -36.5 | 416 |
| bta-miR-2453  | -28.0 | 457 |
| bta-miR-2453  | -27.9 | 206 |
| bta-miR-2453  | -27.9 | 84  |
| bta-miR-2453  | -27.3 | 156 |
| bta-miR-2453  | -26.5 | 561 |
| bta-miR-2453  | -25.5 | 378 |
| bta-miR-2453  | -25.0 | 347 |
| bta-miR-2453  | -24.0 | 51  |
| bta-miR-2453  | -22.6 | 19  |
| bta-miR-2453  | -22.5 | 505 |
| bta-miR-2453  | -20.0 | 658 |
| bta-miR-2453  | -19.9 | 244 |
| bta-miR-2453  | -18.9 | 117 |
| bta-miR-2453  | -18.8 | 619 |
| bta-miR-2453  | -17.5 | 483 |
| bta-miR-2453  | -17.3 | 633 |
| bta-miR-2453  | -17.2 | 686 |

|               |       |     |
|---------------|-------|-----|
| bta-miR-2453  | -16.7 | 283 |
| bta-miR-2453  | -16.2 | 545 |
| bta-miR-2453  | -15.0 | 185 |
| bta-miR-2453  | -13.8 | 1   |
| bta-miR-2453  | -13.6 | 316 |
| bta-miR-2453  | -13.6 | 739 |
| bta-miR-2453  | -13.6 | 235 |
| bta-miR-2453  | -12.9 | 598 |
| bta-miR-2453  | -12.8 | 436 |
| bta-miR-2453  | -12.8 | 712 |
| bta-miR-2453  | -12.0 | 527 |
| bta-miR-2453  | -11.8 | 449 |
| bta-miR-2453  | -11.4 | 137 |
| bta-miR-2453  | -10.9 | 271 |
| bta-miR-2453  | -10.6 | 328 |
| bta-miR-2453  | -10.3 | 408 |
| bta-miR-2454  | -33.4 | 5   |
| bta-miR-2454  | -31.3 | 399 |
| bta-miR-2454  | -30.5 | 86  |
| bta-miR-2454  | -29.6 | 473 |
| bta-miR-2454  | -27.6 | 212 |
| bta-miR-2454  | -27.5 | 577 |
| bta-miR-2454  | -27.2 | 363 |
| bta-miR-2454  | -26.6 | 58  |
| bta-miR-2454  | -25.7 | 261 |
| bta-miR-2454  | -25.1 | 308 |
| bta-miR-2454  | -24.0 | 544 |
| bta-miR-2454  | -23.1 | 654 |
| bta-miR-2454  | -22.7 | 132 |
| bta-miR-2454  | -21.2 | 167 |
| bta-miR-2454  | -21.1 | 692 |
| bta-miR-2454  | -17.5 | 738 |
| bta-miR-2454  | -17.0 | 454 |
| bta-miR-2454  | -15.6 | 280 |
| bta-miR-2454  | -15.6 | 39  |
| bta-miR-2454  | -15.2 | 631 |
| bta-miR-2454  | -13.5 | 520 |
| bta-miR-2454  | -13.2 | 386 |
| bta-miR-2454  | -13.2 | 566 |
| bta-miR-2454  | -12.4 | 681 |
| bta-miR-2454  | -11.7 | 342 |
| bta-miR-2454  | -11.1 | 193 |
| bta-miR-2454  | -10.7 | 288 |
| bta-miR-2454  | -10.7 | 465 |
| bta-miR-2454* | -28.2 | 614 |
| bta-miR-2454* | -28.2 | 202 |
| bta-miR-2454* | -25.5 | 439 |
| bta-miR-2454* | -21.8 | 65  |
| bta-miR-2454* | -21.3 | 479 |
| bta-miR-2454* | -21.1 | 411 |
| bta-miR-2454* | -20.0 | 232 |
| bta-miR-2454* | -19.5 | 265 |
| bta-miR-2454* | -18.8 | 11  |
| bta-miR-2454* | -18.5 | 114 |
| bta-miR-2454* | -18.3 | 348 |
| bta-miR-2454* | -18.1 | 598 |
| bta-miR-2454* | -16.9 | 155 |
| bta-miR-2454* | -14.7 | 559 |
| bta-miR-2454* | -14.5 | 455 |

|               |       |     |
|---------------|-------|-----|
| bta-miR-2454* | -13.2 | 94  |
| bta-miR-2454* | -13.1 | 425 |
| bta-miR-2454* | -12.4 | 659 |
| bta-miR-2454* | -12.3 | 41  |
| bta-miR-2454* | -11.9 | 242 |
| bta-miR-2454* | -11.8 | 737 |
| bta-miR-2454* | -11.6 | 376 |
| bta-miR-2454* | -11.4 | 575 |
| bta-miR-2454* | -10.5 | 669 |
| bta-miR-2455  | -35.0 | 421 |
| bta-miR-2455  | -28.2 | 572 |
| bta-miR-2455  | -28.0 | 248 |
| bta-miR-2455  | -27.6 | 133 |
| bta-miR-2455  | -26.7 | 467 |
| bta-miR-2455  | -26.4 | 110 |
| bta-miR-2455  | -26.4 | 362 |
| bta-miR-2455  | -25.7 | 186 |
| bta-miR-2455  | -25.0 | 390 |
| bta-miR-2455  | -23.3 | 86  |
| bta-miR-2455  | -23.0 | 163 |
| bta-miR-2455  | -22.9 | 209 |
| bta-miR-2455  | -22.3 | 33  |
| bta-miR-2455  | -21.8 | 2   |
| bta-miR-2455  | -20.5 | 502 |
| bta-miR-2455  | -20.5 | 321 |
| bta-miR-2455  | -18.5 | 623 |
| bta-miR-2455  | -16.4 | 289 |
| bta-miR-2455  | -16.3 | 561 |
| bta-miR-2455  | -15.9 | 641 |
| bta-miR-2455  | -15.8 | 19  |
| bta-miR-2455  | -15.5 | 665 |
| bta-miR-2455  | -14.0 | 694 |
| bta-miR-2455  | -13.1 | 457 |
| bta-miR-2455  | -12.7 | 73  |
| bta-miR-2455  | -12.6 | 521 |
| bta-miR-2455  | -12.4 | 606 |
| bta-miR-2455  | -12.0 | 541 |
| bta-miR-2455  | -11.8 | 740 |
| bta-miR-2455  | -10.8 | 281 |
| bta-miR-2455  | -10.6 | 242 |
| bta-miR-2455  | -10.2 | 443 |
| bta-miR-339b  | -28.5 | 622 |
| bta-miR-339b  | -28.3 | 472 |
| bta-miR-339b  | -27.4 | 576 |
| bta-miR-339b  | -25.1 | 204 |
| bta-miR-339b  | -24.4 | 418 |
| bta-miR-339b  | -22.4 | 58  |
| bta-miR-339b  | -21.1 | 357 |
| bta-miR-339b  | -19.7 | 242 |
| bta-miR-339b  | -18.8 | 108 |
| bta-miR-339b  | -18.1 | 166 |
| bta-miR-339b  | -17.5 | 394 |
| bta-miR-339b  | -16.3 | 5   |
| bta-miR-339b  | -15.4 | 86  |
| bta-miR-339b  | -15.3 | 281 |
| bta-miR-339b  | -14.7 | 28  |
| bta-miR-339b  | -14.2 | 342 |
| bta-miR-339b  | -14.0 | 502 |
| bta-miR-339b  | -13.4 | 455 |

|               |       |     |
|---------------|-------|-----|
| bta-miR-339b  | -12.8 | 614 |
| bta-miR-339b  | -12.1 | 190 |
| bta-miR-339b  | -11.9 | 465 |
| bta-miR-339b  | -11.9 | 698 |
| bta-miR-339b  | -11.8 | 559 |
| bta-miR-339b  | -11.5 | 737 |
| bta-miR-339b  | -11.1 | 139 |
| bta-miR-339b  | -10.9 | 129 |
| bta-miR-339b  | -10.7 | 653 |
| bta-miR-1434* | -16.3 | 576 |
| bta-miR-1434* | -15.8 | 1   |
| bta-miR-1434* | -14.6 | 653 |
| bta-miR-1434* | -14.2 | 50  |
| bta-miR-1434* | -13.9 | 449 |
| bta-miR-1434* | -13.5 | 370 |
| bta-miR-1434* | -13.4 | 279 |
| bta-miR-1434* | -13.2 | 506 |
| bta-miR-1434* | -13.1 | 338 |
| bta-miR-1434* | -12.3 | 224 |
| bta-miR-1434* | -12.3 | 389 |
| bta-miR-1434* | -12.2 | 69  |
| bta-miR-1434* | -12.1 | 614 |
| bta-miR-1434* | -11.5 | 239 |
| bta-miR-1434* | -11.5 | 539 |
| bta-miR-1434* | -11.4 | 39  |
| bta-miR-1434* | -10.6 | 482 |
| bta-miR-1434* | -10.5 | 201 |
| bta-miR-1434* | -10.2 | 175 |
| bta-miR-1434  | -19.9 | 261 |
| bta-miR-1434  | -19.4 | 499 |
| bta-miR-1434  | -18.8 | 622 |
| bta-miR-1434  | -17.2 | 9   |
| bta-miR-1434  | -16.3 | 703 |
| bta-miR-1434  | -16.1 | 474 |
| bta-miR-1434  | -16.0 | 192 |
| bta-miR-1434  | -15.9 | 564 |
| bta-miR-1434  | -15.8 | 362 |
| bta-miR-1434  | -14.9 | 596 |
| bta-miR-1434  | -13.9 | 423 |
| bta-miR-1434  | -13.7 | 163 |
| bta-miR-1434  | -13.6 | 516 |
| bta-miR-1434  | -13.1 | 111 |
| bta-miR-1434  | -13.0 | 386 |
| bta-miR-1434  | -13.0 | 82  |
| bta-miR-1434  | -12.8 | 128 |
| bta-miR-1434  | -12.5 | 237 |
| bta-miR-1434  | -12.4 | 737 |
| bta-miR-1434  | -12.2 | 58  |
| bta-miR-1434  | -12.0 | 309 |
| bta-miR-1434  | -11.9 | 581 |
| bta-miR-1434  | -11.9 | 665 |
| bta-miR-1434  | -11.8 | 402 |
| bta-miR-1434  | -11.2 | 216 |
| bta-miR-1434  | -10.7 | 444 |
| bta-miR-1434  | -10.5 | 351 |
| bta-miR-1434  | -10.3 | 25  |
| bta-miR-1434  | -10.2 | 154 |
| bta-miR-2456  | -25.4 | 354 |
| bta-miR-2456  | -24.5 | 55  |

|              |       |     |
|--------------|-------|-----|
| bta-miR-2456 | -23.3 | 581 |
| bta-miR-2456 | -22.8 | 210 |
| bta-miR-2456 | -22.6 | 502 |
| bta-miR-2456 | -21.4 | 161 |
| bta-miR-2456 | -21.4 | 249 |
| bta-miR-2456 | -21.1 | 136 |
| bta-miR-2456 | -20.9 | 106 |
| bta-miR-2456 | -20.4 | 468 |
| bta-miR-2456 | -19.3 | 396 |
| bta-miR-2456 | -19.1 | 2   |
| bta-miR-2456 | -18.6 | 33  |
| bta-miR-2456 | -17.7 | 636 |
| bta-miR-2456 | -17.1 | 607 |
| bta-miR-2456 | -17.1 | 420 |
| bta-miR-2456 | -16.7 | 272 |
| bta-miR-2456 | -15.5 | 318 |
| bta-miR-2456 | -15.3 | 189 |
| bta-miR-2456 | -14.8 | 530 |
| bta-miR-2456 | -14.5 | 120 |
| bta-miR-2456 | -14.3 | 624 |
| bta-miR-2456 | -14.2 | 86  |
| bta-miR-2456 | -12.9 | 236 |
| bta-miR-2456 | -12.8 | 712 |
| bta-miR-2456 | -12.0 | 560 |
| bta-miR-2456 | -11.8 | 386 |
| bta-miR-2456 | -11.0 | 330 |
| bta-miR-2456 | -10.5 | 292 |
| bta-miR-2456 | -10.3 | 461 |
| bta-miR-2457 | -27.0 | 65  |
| bta-miR-2457 | -25.1 | 407 |
| bta-miR-2457 | -24.6 | 480 |
| bta-miR-2457 | -24.5 | 12  |
| bta-miR-2457 | -23.6 | 659 |
| bta-miR-2457 | -22.6 | 617 |
| bta-miR-2457 | -21.3 | 265 |
| bta-miR-2457 | -18.7 | 171 |
| bta-miR-2457 | -18.6 | 376 |
| bta-miR-2457 | -18.3 | 559 |
| bta-miR-2457 | -15.9 | 456 |
| bta-miR-2457 | -15.8 | 108 |
| bta-miR-2457 | -15.3 | 429 |
| bta-miR-2457 | -15.3 | 525 |
| bta-miR-2457 | -14.6 | 358 |
| bta-miR-2457 | -12.1 | 214 |
| bta-miR-2457 | -11.9 | 694 |
| bta-miR-2457 | -11.8 | 155 |
| bta-miR-2457 | -11.7 | 741 |
| bta-miR-2457 | -11.2 | 517 |
| bta-miR-2457 | -10.4 | 5   |
| bta-miR-2458 | -20.5 | 492 |
| bta-miR-2458 | -19.7 | 383 |
| bta-miR-2458 | -19.6 | 457 |
| bta-miR-2458 | -19.2 | 126 |
| bta-miR-2458 | -18.5 | 698 |
| bta-miR-2458 | -17.3 | 61  |
| bta-miR-2458 | -17.0 | 275 |
| bta-miR-2458 | -17.0 | 559 |
| bta-miR-2458 | -16.6 | 167 |
| bta-miR-2458 | -16.0 | 353 |



|              |       |     |
|--------------|-------|-----|
| bta-miR-2458 | -15.8 | 654 |
| bta-miR-2458 | -15.1 | 107 |
| bta-miR-2458 | -14.9 | 205 |
| bta-miR-2458 | -14.9 | 617 |
| bta-miR-2458 | -14.6 | 415 |
| bta-miR-2458 | -14.6 | 297 |
| bta-miR-2458 | -14.4 | 528 |
| bta-miR-2458 | -13.8 | 148 |
| bta-miR-2458 | -13.6 | 22  |
| bta-miR-2458 | -13.4 | 244 |
| bta-miR-2458 | -13.3 | 593 |
| bta-miR-2458 | -13.2 | 739 |
| bta-miR-2458 | -12.7 | 632 |
| bta-miR-2458 | -12.0 | 263 |
| bta-miR-2458 | -11.1 | 341 |
| bta-miR-2458 | -11.0 | 38  |
| bta-miR-2458 | -10.9 | 2   |
| bta-miR-2458 | -10.9 | 520 |
| bta-miR-2458 | -10.8 | 92  |
| bta-miR-2458 | -10.7 | 224 |
| bta-miR-2458 | -10.3 | 680 |
| bta-miR-2458 | -10.1 | 326 |
| bta-miR-2459 | -23.7 | 463 |
| bta-miR-2459 | -22.2 | 26  |
| bta-miR-2459 | -21.4 | 128 |
| bta-miR-2459 | -21.2 | 559 |
| bta-miR-2459 | -20.6 | 243 |
| bta-miR-2459 | -20.3 | 44  |
| bta-miR-2459 | -19.8 | 385 |
| bta-miR-2459 | -18.8 | 355 |
| bta-miR-2459 | -18.3 | 107 |
| bta-miR-2459 | -18.0 | 5   |
| bta-miR-2459 | -17.9 | 205 |
| bta-miR-2459 | -17.7 | 623 |
| bta-miR-2459 | -17.7 | 692 |
| bta-miR-2459 | -17.5 | 72  |
| bta-miR-2459 | -17.3 | 645 |
| bta-miR-2459 | -17.2 | 282 |
| bta-miR-2459 | -16.2 | 165 |
| bta-miR-2459 | -16.1 | 500 |
| bta-miR-2459 | -15.5 | 583 |
| bta-miR-2459 | -14.8 | 422 |
| bta-miR-2459 | -14.7 | 182 |
| bta-miR-2459 | -13.7 | 742 |
| bta-miR-2459 | -13.6 | 484 |
| bta-miR-2459 | -13.2 | 326 |
| bta-miR-2459 | -12.4 | 311 |
| bta-miR-2459 | -11.3 | 90  |
| bta-miR-2459 | -11.3 | 539 |
| bta-miR-2459 | -10.5 | 117 |
| bta-miR-2459 | -10.2 | 714 |
| bta-miR-2459 | -10.1 | 416 |
| bta-miR-2460 | -33.7 | 266 |
| bta-miR-2460 | -30.1 | 7   |
| bta-miR-2460 | -27.0 | 420 |
| bta-miR-2460 | -27.0 | 109 |
| bta-miR-2460 | -26.2 | 66  |
| bta-miR-2460 | -25.7 | 562 |
| bta-miR-2460 | -25.2 | 172 |

|                 |       |     |
|-----------------|-------|-----|
| bta-miR-2460    | -25.2 | 603 |
| bta-miR-2460    | -24.2 | 465 |
| bta-miR-2460    | -23.4 | 493 |
| bta-miR-2460    | -22.8 | 359 |
| bta-miR-2460    | -20.1 | 305 |
| bta-miR-2460    | -19.5 | 232 |
| bta-miR-2460    | -19.2 | 38  |
| bta-miR-2460    | -19.1 | 697 |
| bta-miR-2460    | -18.3 | 658 |
| bta-miR-2460    | -18.3 | 445 |
| bta-miR-2460    | -17.7 | 408 |
| bta-miR-2460    | -15.6 | 154 |
| bta-miR-2460    | -15.0 | 388 |
| bta-miR-2460    | -14.8 | 518 |
| bta-miR-2460    | -14.5 | 342 |
| bta-miR-2460    | -13.2 | 215 |
| bta-miR-2460    | -12.3 | 596 |
| bta-miR-2460    | -12.1 | 95  |
| bta-miR-2460    | -12.1 | 256 |
| bta-miR-2460    | -12.1 | 629 |
| bta-miR-2460    | -10.9 | 136 |
| bta-miR-2460    | -10.9 | 325 |
| bta-miR-2460    | -10.8 | 738 |
| bta-miR-1777b   | -37.3 | 317 |
| bta-miR-1777b   | -34.8 | 236 |
| bta-miR-1777b   | -33.2 | 127 |
| bta-miR-1777b   | -28.7 | 564 |
| bta-miR-1777b   | -27.8 | 98  |
| bta-miR-1777b   | -27.6 | 461 |
| bta-miR-1777b   | -27.1 | 163 |
| bta-miR-1777b   | -26.5 | 14  |
| bta-miR-1777b   | -24.5 | 502 |
| bta-miR-1777b   | -24.3 | 396 |
| bta-miR-1777b   | -22.8 | 342 |
| bta-miR-1777b   | -21.6 | 291 |
| bta-miR-1777b   | -20.9 | 73  |
| bta-miR-1777b   | -19.2 | 43  |
| bta-miR-1777b   | -18.9 | 271 |
| bta-miR-1777b   | -18.5 | 374 |
| bta-miR-1777b   | -17.3 | 582 |
| bta-miR-1777b   | -16.1 | 695 |
| bta-miR-1777b   | -15.6 | 642 |
| bta-miR-1777b   | -15.6 | 206 |
| bta-miR-1777b   | -14.5 | 484 |
| bta-miR-1777b   | -14.1 | 2   |
| bta-miR-1777b   | -14.1 | 740 |
| bta-miR-1777b   | -13.6 | 624 |
| bta-miR-1777b   | -13.2 | 524 |
| bta-miR-1777b   | -11.9 | 146 |
| bta-miR-1777b   | -11.9 | 545 |
| bta-miR-1777b   | -10.1 | 368 |
| bta-miR-1777b   | -10.1 | 674 |
| bta-miR-2461-5p | -29.6 | 596 |
| bta-miR-2461-5p | -26.3 | 428 |
| bta-miR-2461-5p | -25.3 | 360 |
| bta-miR-2461-5p | -24.6 | 473 |
| bta-miR-2461-5p | -24.5 | 51  |
| bta-miR-2461-5p | -24.3 | 408 |
| bta-miR-2461-5p | -23.0 | 7   |

|                 |       |     |
|-----------------|-------|-----|
| bta-miR-2461-5p | -23.0 | 172 |
| bta-miR-2461-5p | -21.6 | 206 |
| bta-miR-2461-5p | -20.1 | 81  |
| bta-miR-2461-5p | -19.8 | 109 |
| bta-miR-2461-5p | -18.4 | 235 |
| bta-miR-2461-5p | -17.5 | 562 |
| bta-miR-2461-5p | -17.4 | 622 |
| bta-miR-2461-5p | -16.8 | 697 |
| bta-miR-2461-5p | -16.2 | 307 |
| bta-miR-2461-5p | -16.0 | 506 |
| bta-miR-2461-5p | -15.6 | 453 |
| bta-miR-2461-5p | -15.4 | 30  |
| bta-miR-2461-5p | -15.3 | 342 |
| bta-miR-2461-5p | -14.3 | 658 |
| bta-miR-2461-5p | -13.7 | 277 |
| bta-miR-2461-5p | -12.3 | 380 |
| bta-miR-2461-5p | -11.3 | 581 |
| bta-miR-2461-5p | -10.1 | 143 |
| bta-miR-2461-3p | -27.5 | 381 |
| bta-miR-2461-3p | -25.7 | 418 |
| bta-miR-2461-3p | -24.2 | 616 |
| bta-miR-2461-3p | -21.5 | 11  |
| bta-miR-2461-3p | -21.1 | 175 |
| bta-miR-2461-3p | -20.5 | 269 |
| bta-miR-2461-3p | -20.3 | 506 |
| bta-miR-2461-3p | -19.7 | 555 |
| bta-miR-2461-3p | -19.3 | 66  |
| bta-miR-2461-3p | -19.0 | 481 |
| bta-miR-2461-3p | -18.4 | 654 |
| bta-miR-2461-3p | -18.0 | 154 |
| bta-miR-2461-3p | -17.4 | 575 |
| bta-miR-2461-3p | -17.3 | 448 |
| bta-miR-2461-3p | -17.2 | 532 |
| bta-miR-2461-3p | -16.1 | 114 |
| bta-miR-2461-3p | -15.6 | 41  |
| bta-miR-2461-3p | -15.3 | 300 |
| bta-miR-2461-3p | -14.8 | 241 |
| bta-miR-2461-3p | -14.7 | 353 |
| bta-miR-2461-3p | -14.6 | 687 |
| bta-miR-2461-3p | -13.2 | 737 |
| bta-miR-2461-3p | -12.7 | 598 |
| bta-miR-2461-3p | -12.2 | 403 |
| bta-miR-2461-3p | -11.5 | 469 |
| bta-miR-2461-3p | -11.3 | 636 |
| bta-miR-2461-3p | -10.9 | 344 |
| bta-miR-2461-3p | -10.7 | 4   |
| bta-miR-2461-3p | -10.0 | 219 |
| bta-miR-2462    | -22.3 | 177 |
| bta-miR-2462    | -19.8 | 488 |
| bta-miR-2462    | -19.1 | 380 |
| bta-miR-2462    | -19.0 | 663 |
| bta-miR-2462    | -18.9 | 117 |
| bta-miR-2462    | -17.9 | 561 |
| bta-miR-2462    | -17.8 | 688 |
| bta-miR-2462    | -16.7 | 21  |
| bta-miR-2462    | -16.0 | 410 |
| bta-miR-2462    | -15.8 | 463 |
| bta-miR-2462    | -15.8 | 80  |
| bta-miR-2462    | -14.9 | 243 |

|                 |       |     |
|-----------------|-------|-----|
| bta-miR-2462    | -14.9 | 149 |
| bta-miR-2462    | -14.8 | 301 |
| bta-miR-2462    | -14.7 | 199 |
| bta-miR-2462    | -14.6 | 43  |
| bta-miR-2462    | -14.2 | 271 |
| bta-miR-2462    | -13.9 | 512 |
| bta-miR-2462    | -13.6 | 353 |
| bta-miR-2462    | -13.3 | 107 |
| bta-miR-2462    | -13.0 | 5   |
| bta-miR-2462    | -12.8 | 535 |
| bta-miR-2462    | -12.8 | 165 |
| bta-miR-2462    | -12.6 | 624 |
| bta-miR-2462    | -12.2 | 482 |
| bta-miR-2462    | -12.2 | 583 |
| bta-miR-2462    | -11.7 | 66  |
| bta-miR-2462    | -11.3 | 229 |
| bta-miR-2462    | -11.3 | 603 |
| bta-miR-2462    | -11.1 | 263 |
| bta-miR-2462    | -11.1 | 136 |
| bta-miR-2462    | -10.7 | 170 |
| bta-miR-2462    | -10.5 | 456 |
| bta-miR-2463    | -21.7 | 351 |
| bta-miR-2463    | -21.0 | 100 |
| bta-miR-2463    | -20.5 | 41  |
| bta-miR-2463    | -19.1 | 507 |
| bta-miR-2463    | -18.8 | 80  |
| bta-miR-2463    | -18.2 | 479 |
| bta-miR-2463    | -18.1 | 154 |
| bta-miR-2463    | -17.2 | 592 |
| bta-miR-2463    | -16.6 | 130 |
| bta-miR-2463    | -16.3 | 238 |
| bta-miR-2463    | -16.3 | 313 |
| bta-miR-2463    | -16.0 | 200 |
| bta-miR-2463    | -15.9 | 10  |
| bta-miR-2463    | -15.8 | 393 |
| bta-miR-2463    | -15.7 | 632 |
| bta-miR-2463    | -15.6 | 269 |
| bta-miR-2463    | -15.6 | 418 |
| bta-miR-2463    | -15.1 | 570 |
| bta-miR-2463    | -13.8 | 737 |
| bta-miR-2463    | -13.7 | 143 |
| bta-miR-2463    | -13.7 | 325 |
| bta-miR-2463    | -13.6 | 454 |
| bta-miR-2463    | -12.9 | 548 |
| bta-miR-2463    | -12.7 | 710 |
| bta-miR-2463    | -12.3 | 665 |
| bta-miR-2463    | -10.6 | 31  |
| bta-miR-2463    | -10.6 | 66  |
| bta-miR-2463    | -10.6 | 673 |
| bta-miR-2463    | -10.3 | 177 |
| bta-miR-2463    | -10.0 | 259 |
| bta-miR-2464-5p | -29.6 | 44  |
| bta-miR-2464-5p | -24.8 | 476 |
| bta-miR-2464-5p | -24.7 | 596 |
| bta-miR-2464-5p | -24.2 | 4   |
| bta-miR-2464-5p | -23.7 | 416 |
| bta-miR-2464-5p | -23.2 | 566 |
| bta-miR-2464-5p | -21.2 | 112 |
| bta-miR-2464-5p | -20.5 | 512 |

|                 |       |     |
|-----------------|-------|-----|
| bta-miR-2464-5p | -20.1 | 258 |
| bta-miR-2464-5p | -19.8 | 173 |
| bta-miR-2464-5p | -19.7 | 212 |
| bta-miR-2464-5p | -17.2 | 74  |
| bta-miR-2464-5p | -16.8 | 386 |
| bta-miR-2464-5p | -16.7 | 622 |
| bta-miR-2464-5p | -16.4 | 637 |
| bta-miR-2464-5p | -15.1 | 342 |
| bta-miR-2464-5p | -15.0 | 540 |
| bta-miR-2464-5p | -14.7 | 369 |
| bta-miR-2464-5p | -13.8 | 146 |
| bta-miR-2464-5p | -13.7 | 448 |
| bta-miR-2464-5p | -13.2 | 678 |
| bta-miR-2464-5p | -12.9 | 660 |
| bta-miR-2464-5p | -12.9 | 286 |
| bta-miR-2464-5p | -12.6 | 461 |
| bta-miR-2464-5p | -11.9 | 691 |
| bta-miR-2464-5p | -11.4 | 740 |
| bta-miR-2464-5p | -10.4 | 316 |
| bta-miR-2464-5p | -10.4 | 502 |
| bta-miR-2464-5p | -10.2 | 34  |
| bta-miR-2464-3p | -25.4 | 463 |
| bta-miR-2464-3p | -22.0 | 410 |
| bta-miR-2464-3p | -21.5 | 5   |
| bta-miR-2464-3p | -20.8 | 613 |
| bta-miR-2464-3p | -20.2 | 386 |
| bta-miR-2464-3p | -20.1 | 83  |
| bta-miR-2464-3p | -19.6 | 59  |
| bta-miR-2464-3p | -19.3 | 167 |
| bta-miR-2464-3p | -19.2 | 264 |
| bta-miR-2464-3p | -19.1 | 694 |
| bta-miR-2464-3p | -17.8 | 427 |
| bta-miR-2464-3p | -17.2 | 575 |
| bta-miR-2464-3p | -17.0 | 203 |
| bta-miR-2464-3p | -16.3 | 663 |
| bta-miR-2464-3p | -16.0 | 360 |
| bta-miR-2464-3p | -15.9 | 491 |
| bta-miR-2464-3p | -15.3 | 552 |
| bta-miR-2464-3p | -15.0 | 527 |
| bta-miR-2464-3p | -14.2 | 641 |
| bta-miR-2464-3p | -14.1 | 117 |
| bta-miR-2464-3p | -13.5 | 20  |
| bta-miR-2464-3p | -13.4 | 290 |
| bta-miR-2464-3p | -13.1 | 225 |
| bta-miR-2464-3p | -13.0 | 186 |
| bta-miR-2464-3p | -12.3 | 740 |
| bta-miR-2464-3p | -11.8 | 516 |
| bta-miR-2464-3p | -10.8 | 451 |
| bta-miR-2464-3p | -10.4 | 376 |
| bta-miR-2464-3p | -10.3 | 146 |
| bta-miR-2464-3p | -10.1 | 235 |
| bta-miR-2464-3p | -10.1 | 345 |
| bta-miR-2465    | -27.3 | 409 |
| bta-miR-2465    | -26.4 | 572 |
| bta-miR-2465    | -24.9 | 467 |
| bta-miR-2465    | -23.6 | 619 |
| bta-miR-2465    | -23.6 | 70  |
| bta-miR-2465    | -22.8 | 650 |
| bta-miR-2465    | -21.8 | 514 |

|                 |       |     |
|-----------------|-------|-----|
| bta-miR-2465    | -21.4 | 4   |
| bta-miR-2465    | -20.6 | 235 |
| bta-miR-2465    | -19.9 | 97  |
| bta-miR-2465    | -18.3 | 277 |
| bta-miR-2465    | -17.8 | 488 |
| bta-miR-2465    | -17.2 | 152 |
| bta-miR-2465    | -16.5 | 34  |
| bta-miR-2465    | -16.5 | 173 |
| bta-miR-2465    | -16.1 | 532 |
| bta-miR-2465    | -15.2 | 374 |
| bta-miR-2465    | -15.2 | 204 |
| bta-miR-2465    | -14.1 | 596 |
| bta-miR-2465    | -13.3 | 692 |
| bta-miR-2465    | -13.1 | 357 |
| bta-miR-2465    | -13.1 | 739 |
| bta-miR-2465    | -12.2 | 452 |
| bta-miR-2465    | -12.2 | 670 |
| bta-miR-2465    | -11.9 | 120 |
| bta-miR-2465    | -10.9 | 607 |
| bta-miR-2465    | -10.7 | 427 |
| bta-miR-2466-5p | -30.4 | 22  |
| bta-miR-2466-5p | -29.7 | 114 |
| bta-miR-2466-5p | -29.0 | 353 |
| bta-miR-2466-5p | -28.0 | 381 |
| bta-miR-2466-5p | -26.7 | 582 |
| bta-miR-2466-5p | -24.3 | 257 |
| bta-miR-2466-5p | -24.0 | 160 |
| bta-miR-2466-5p | -23.4 | 84  |
| bta-miR-2466-5p | -22.2 | 425 |
| bta-miR-2466-5p | -21.8 | 56  |
| bta-miR-2466-5p | -21.7 | 469 |
| bta-miR-2466-5p | -21.6 | 319 |
| bta-miR-2466-5p | -21.5 | 137 |
| bta-miR-2466-5p | -21.0 | 560 |
| bta-miR-2466-5p | -20.6 | 1   |
| bta-miR-2466-5p | -20.3 | 488 |
| bta-miR-2466-5p | -19.9 | 654 |
| bta-miR-2466-5p | -19.8 | 238 |
| bta-miR-2466-5p | -18.5 | 300 |
| bta-miR-2466-5p | -18.5 | 185 |
| bta-miR-2466-5p | -17.2 | 696 |
| bta-miR-2466-5p | -16.5 | 206 |
| bta-miR-2466-5p | -16.3 | 454 |
| bta-miR-2466-5p | -16.1 | 624 |
| bta-miR-2466-5p | -15.6 | 329 |
| bta-miR-2466-5p | -14.0 | 516 |
| bta-miR-2466-5p | -13.7 | 739 |
| bta-miR-2466-5p | -13.5 | 535 |
| bta-miR-2466-5p | -11.7 | 109 |
| bta-miR-2466-5p | -10.6 | 283 |
| bta-miR-2466-5p | -10.5 | 606 |
| bta-miR-2466-5p | -10.3 | 51  |
| bta-miR-2466-3p | -30.5 | 61  |
| bta-miR-2466-3p | -29.6 | 432 |
| bta-miR-2466-3p | -28.7 | 403 |
| bta-miR-2466-3p | -27.9 | 598 |
| bta-miR-2466-3p | -27.0 | 92  |
| bta-miR-2466-3p | -25.4 | 3   |
| bta-miR-2466-3p | -22.4 | 216 |

|                 |       |     |
|-----------------|-------|-----|
| bta-miR-2466-3p | -21.6 | 257 |
| bta-miR-2466-3p | -19.9 | 464 |
| bta-miR-2466-3p | -19.9 | 561 |
| bta-miR-2466-3p | -19.4 | 170 |
| bta-miR-2466-3p | -19.4 | 730 |
| bta-miR-2466-3p | -18.3 | 356 |
| bta-miR-2466-3p | -16.3 | 495 |
| bta-miR-2466-3p | -14.9 | 423 |
| bta-miR-2466-3p | -14.6 | 630 |
| bta-miR-2466-3p | -13.2 | 125 |
| bta-miR-2466-3p | -13.1 | 650 |
| bta-miR-2466-3p | -12.5 | 27  |
| bta-miR-2466-3p | -11.8 | 347 |
| bta-miR-2466-3p | -11.6 | 188 |
| bta-miR-2466-3p | -11.0 | 235 |
| bta-miR-2466-3p | -10.9 | 147 |
| bta-miR-2467*   | -34.4 | 616 |
| bta-miR-2467*   | -30.4 | 63  |
| bta-miR-2467*   | -29.1 | 411 |
| bta-miR-2467*   | -28.7 | 447 |
| bta-miR-2467*   | -25.5 | 4   |
| bta-miR-2467*   | -22.9 | 494 |
| bta-miR-2467*   | -22.1 | 154 |
| bta-miR-2467*   | -20.9 | 107 |
| bta-miR-2467*   | -20.6 | 575 |
| bta-miR-2467*   | -19.9 | 232 |
| bta-miR-2467*   | -18.2 | 653 |
| bta-miR-2467*   | -16.2 | 119 |
| bta-miR-2467*   | -16.0 | 29  |
| bta-miR-2467*   | -15.8 | 482 |
| bta-miR-2467*   | -15.6 | 559 |
| bta-miR-2467*   | -15.4 | 358 |
| bta-miR-2467*   | -15.3 | 515 |
| bta-miR-2467*   | -15.2 | 198 |
| bta-miR-2467*   | -13.3 | 279 |
| bta-miR-2467*   | -12.6 | 50  |
| bta-miR-2467*   | -12.5 | 425 |
| bta-miR-2467*   | -12.3 | 741 |
| bta-miR-2467*   | -11.5 | 698 |
| bta-miR-2467*   | -11.0 | 539 |
| bta-miR-2467*   | -10.9 | 669 |
| bta-miR-2467*   | -10.5 | 183 |
| bta-miR-2467*   | -10.3 | 86  |
| bta-miR-2467    | -36.4 | 107 |
| bta-miR-2467    | -35.2 | 407 |
| bta-miR-2467    | -30.4 | 64  |
| bta-miR-2467    | -30.1 | 234 |
| bta-miR-2467    | -28.8 | 361 |
| bta-miR-2467    | -26.9 | 165 |
| bta-miR-2467    | -26.6 | 563 |
| bta-miR-2467    | -26.2 | 472 |
| bta-miR-2467    | -26.1 | 29  |
| bta-miR-2467    | -25.9 | 270 |
| bta-miR-2467    | -23.7 | 499 |
| bta-miR-2467    | -21.6 | 623 |
| bta-miR-2467    | -20.3 | 198 |
| bta-miR-2467    | -19.8 | 653 |
| bta-miR-2467    | -19.1 | 4   |
| bta-miR-2467    | -17.3 | 135 |

|              |       |     |
|--------------|-------|-----|
| bta-miR-2467 | -17.3 | 321 |
| bta-miR-2467 | -17.3 | 451 |
| bta-miR-2467 | -16.2 | 394 |
| bta-miR-2467 | -14.7 | 524 |
| bta-miR-2467 | -14.3 | 698 |
| bta-miR-2467 | -13.6 | 737 |
| bta-miR-2467 | -12.9 | 146 |
| bta-miR-2467 | -12.9 | 435 |
| bta-miR-2467 | -12.8 | 214 |
| bta-miR-2467 | -12.6 | 596 |
| bta-miR-2467 | -12.4 | 96  |
| bta-miR-2467 | -11.6 | 543 |
| bta-miR-2467 | -10.6 | 345 |
| bta-miR-2468 | -20.0 | 452 |
| bta-miR-2468 | -19.3 | 372 |
| bta-miR-2468 | -19.0 | 563 |
| bta-miR-2468 | -18.8 | 497 |
| bta-miR-2468 | -17.6 | 66  |
| bta-miR-2468 | -16.8 | 206 |
| bta-miR-2468 | -16.8 | 270 |
| bta-miR-2468 | -16.5 | 1   |
| bta-miR-2468 | -16.0 | 634 |
| bta-miR-2468 | -15.8 | 413 |
| bta-miR-2468 | -14.2 | 122 |
| bta-miR-2468 | -14.1 | 668 |
| bta-miR-2468 | -13.8 | 43  |
| bta-miR-2468 | -13.5 | 176 |
| bta-miR-2468 | -13.4 | 94  |
| bta-miR-2468 | -13.2 | 301 |
| bta-miR-2468 | -12.9 | 337 |
| bta-miR-2468 | -12.9 | 539 |
| bta-miR-2468 | -12.7 | 605 |
| bta-miR-2468 | -12.5 | 476 |
| bta-miR-2468 | -12.5 | 240 |
| bta-miR-2468 | -12.4 | 155 |
| bta-miR-2468 | -12.0 | 588 |
| bta-miR-2468 | -11.9 | 711 |
| bta-miR-2468 | -11.9 | 738 |
| bta-miR-2469 | -28.4 | 471 |
| bta-miR-2469 | -27.3 | 615 |
| bta-miR-2469 | -24.2 | 418 |
| bta-miR-2469 | -23.0 | 65  |
| bta-miR-2469 | -22.4 | 242 |
| bta-miR-2469 | -22.0 | 558 |
| bta-miR-2469 | -21.5 | 4   |
| bta-miR-2469 | -20.7 | 342 |
| bta-miR-2469 | -20.6 | 108 |
| bta-miR-2469 | -19.9 | 166 |
| bta-miR-2469 | -17.9 | 502 |
| bta-miR-2469 | -17.6 | 652 |
| bta-miR-2469 | -17.0 | 84  |
| bta-miR-2469 | -16.6 | 443 |
| bta-miR-2469 | -16.6 | 36  |
| bta-miR-2469 | -16.4 | 394 |
| bta-miR-2469 | -16.1 | 269 |
| bta-miR-2469 | -16.1 | 596 |
| bta-miR-2469 | -16.1 | 124 |
| bta-miR-2469 | -14.3 | 154 |
| bta-miR-2469 | -13.3 | 202 |



|              |       |     |
|--------------|-------|-----|
| bta-miR-2469 | -13.0 | 223 |
| bta-miR-2469 | -12.3 | 323 |
| bta-miR-2469 | -12.1 | 308 |
| bta-miR-2469 | -12.0 | 30  |
| bta-miR-2469 | -11.6 | 696 |
| bta-miR-2469 | -11.5 | 736 |
| bta-miR-2469 | -10.9 | 380 |
| bta-miR-2469 | -10.2 | 281 |
| bta-miR-2469 | -10.0 | 548 |
| bta-miR-2470 | -23.7 | 94  |
| bta-miR-2470 | -22.2 | 463 |
| bta-miR-2470 | -21.7 | 351 |
| bta-miR-2470 | -20.4 | 128 |
| bta-miR-2470 | -18.8 | 592 |
| bta-miR-2470 | -18.6 | 228 |
| bta-miR-2470 | -18.3 | 41  |
| bta-miR-2470 | -17.5 | 418 |
| bta-miR-2470 | -17.4 | 495 |
| bta-miR-2470 | -17.1 | 203 |
| bta-miR-2470 | -16.9 | 393 |
| bta-miR-2470 | -16.4 | 154 |
| bta-miR-2470 | -16.2 | 10  |
| bta-miR-2470 | -15.6 | 563 |
| bta-miR-2470 | -15.6 | 313 |
| bta-miR-2470 | -15.6 | 635 |
| bta-miR-2470 | -15.2 | 269 |
| bta-miR-2470 | -14.5 | 661 |
| bta-miR-2470 | -13.6 | 188 |
| bta-miR-2470 | -13.3 | 447 |
| bta-miR-2470 | -12.7 | 481 |
| bta-miR-2470 | -12.7 | 575 |
| bta-miR-2470 | -12.6 | 376 |
| bta-miR-2470 | -12.4 | 737 |
| bta-miR-2470 | -12.3 | 71  |
| bta-miR-2470 | -12.0 | 710 |
| bta-miR-2470 | -11.9 | 613 |
| bta-miR-2470 | -11.7 | 338 |
| bta-miR-2471 | -25.6 | 474 |
| bta-miR-2471 | -25.5 | 213 |
| bta-miR-2471 | -22.5 | 430 |
| bta-miR-2471 | -21.4 | 342 |
| bta-miR-2471 | -19.8 | 261 |
| bta-miR-2471 | -19.7 | 58  |
| bta-miR-2471 | -19.6 | 625 |
| bta-miR-2471 | -19.0 | 110 |
| bta-miR-2471 | -18.8 | 176 |
| bta-miR-2471 | -18.6 | 396 |
| bta-miR-2471 | -18.3 | 598 |
| bta-miR-2471 | -17.0 | 693 |
| bta-miR-2471 | -16.3 | 564 |
| bta-miR-2471 | -15.9 | 14  |
| bta-miR-2471 | -14.2 | 730 |
| bta-miR-2471 | -13.6 | 201 |
| bta-miR-2471 | -13.4 | 369 |
| bta-miR-2471 | -13.3 | 239 |
| bta-miR-2471 | -13.0 | 290 |
| bta-miR-2471 | -12.4 | 581 |
| bta-miR-2471 | -12.4 | 657 |
| bta-miR-2471 | -12.0 | 614 |

|               |       |     |
|---------------|-------|-----|
| bta-miR-2471  | -11.2 | 94  |
| bta-miR-2471  | -10.7 | 521 |
| bta-miR-2471  | -10.6 | 463 |
| bta-miR-2471  | -10.0 | 1   |
| bta-miR-2471* | -30.1 | 80  |
| bta-miR-2471* | -23.2 | 414 |
| bta-miR-2471* | -23.0 | 108 |
| bta-miR-2471* | -22.1 | 12  |
| bta-miR-2471* | -21.3 | 198 |
| bta-miR-2471* | -21.0 | 265 |
| bta-miR-2471* | -20.8 | 605 |
| bta-miR-2471* | -20.1 | 623 |
| bta-miR-2471* | -19.9 | 65  |
| bta-miR-2471* | -17.1 | 472 |
| bta-miR-2471* | -16.6 | 448 |
| bta-miR-2471* | -16.5 | 171 |
| bta-miR-2471* | -16.5 | 559 |
| bta-miR-2471* | -15.8 | 37  |
| bta-miR-2471* | -14.4 | 381 |
| bta-miR-2471* | -14.1 | 653 |
| bta-miR-2471* | -13.9 | 506 |
| bta-miR-2471* | -13.1 | 282 |
| bta-miR-2471* | -12.7 | 737 |
| bta-miR-2471* | -11.7 | 228 |
| bta-miR-2471* | -11.5 | 698 |
| bta-miR-2471* | -11.4 | 539 |
| bta-miR-2471* | -11.3 | 586 |
| bta-miR-2471* | -11.2 | 2   |
| bta-miR-2471* | -10.8 | 155 |
| bta-miR-2471* | -10.6 | 243 |
| bta-miR-2471* | -10.2 | 520 |
| bta-miR-2472  | -29.1 | 86  |
| bta-miR-2472  | -26.1 | 419 |
| bta-miR-2472  | -25.5 | 308 |
| bta-miR-2472  | -25.1 | 384 |
| bta-miR-2472  | -23.5 | 353 |
| bta-miR-2472  | -23.2 | 457 |
| bta-miR-2472  | -23.0 | 233 |
| bta-miR-2472  | -22.6 | 488 |
| bta-miR-2472  | -22.1 | 22  |
| bta-miR-2472  | -21.9 | 126 |
| bta-miR-2472  | -20.2 | 183 |
| bta-miR-2472  | -20.0 | 560 |
| bta-miR-2472  | -18.8 | 156 |
| bta-miR-2472  | -18.7 | 249 |
| bta-miR-2472  | -18.6 | 326 |
| bta-miR-2472  | -17.4 | 594 |
| bta-miR-2472  | -17.2 | 705 |
| bta-miR-2472  | -14.5 | 514 |
| bta-miR-2472  | -14.0 | 51  |
| bta-miR-2472  | -13.8 | 654 |
| bta-miR-2472  | -13.6 | 624 |
| bta-miR-2472  | -13.5 | 2   |
| bta-miR-2472  | -13.1 | 684 |
| bta-miR-2472  | -11.1 | 339 |
| bta-miR-2472  | -10.5 | 406 |
| bta-miR-2473  | -23.4 | 450 |
| bta-miR-2473  | -22.2 | 663 |
| bta-miR-2473  | -21.9 | 616 |

|              |       |     |
|--------------|-------|-----|
| bta-miR-2473 | -20.4 | 65  |
| bta-miR-2473 | -20.1 | 418 |
| bta-miR-2473 | -19.4 | 506 |
| bta-miR-2473 | -18.5 | 174 |
| bta-miR-2473 | -17.6 | 101 |
| bta-miR-2473 | -17.2 | 575 |
| bta-miR-2473 | -17.1 | 348 |
| bta-miR-2473 | -16.8 | 227 |
| bta-miR-2473 | -15.8 | 394 |
| bta-miR-2473 | -15.6 | 202 |
| bta-miR-2473 | -15.4 | 5   |
| bta-miR-2473 | -15.0 | 558 |
| bta-miR-2473 | -14.7 | 630 |
| bta-miR-2473 | -14.5 | 268 |
| bta-miR-2473 | -14.4 | 28  |
| bta-miR-2473 | -14.3 | 371 |
| bta-miR-2473 | -14.3 | 539 |
| bta-miR-2473 | -14.1 | 736 |
| bta-miR-2473 | -13.4 | 694 |
| bta-miR-2473 | -13.2 | 439 |
| bta-miR-2473 | -13.0 | 487 |
| bta-miR-2473 | -12.7 | 12  |
| bta-miR-2473 | -12.4 | 126 |
| bta-miR-2473 | -12.4 | 598 |
| bta-miR-2473 | -12.2 | 154 |
| bta-miR-2473 | -11.9 | 652 |
| bta-miR-2473 | -11.5 | 51  |
| bta-miR-2473 | -11.4 | 609 |
| bta-miR-2473 | -11.1 | 307 |
| bta-miR-2473 | -11.0 | 386 |
| bta-miR-2473 | -10.6 | 710 |
| bta-miR-2473 | -10.5 | 496 |
| bta-miR-2473 | -10.5 | 567 |
| bta-miR-2474 | -31.5 | 400 |
| bta-miR-2474 | -27.0 | 578 |
| bta-miR-2474 | -26.6 | 90  |
| bta-miR-2474 | -26.4 | 511 |
| bta-miR-2474 | -22.5 | 55  |
| bta-miR-2474 | -22.5 | 5   |
| bta-miR-2474 | -22.0 | 461 |
| bta-miR-2474 | -21.7 | 139 |
| bta-miR-2474 | -21.1 | 236 |
| bta-miR-2474 | -20.7 | 713 |
| bta-miR-2474 | -20.5 | 259 |
| bta-miR-2474 | -20.1 | 637 |
| bta-miR-2474 | -20.0 | 190 |
| bta-miR-2474 | -18.3 | 342 |
| bta-miR-2474 | -18.1 | 617 |
| bta-miR-2474 | -18.0 | 491 |
| bta-miR-2474 | -17.9 | 310 |
| bta-miR-2474 | -17.7 | 549 |
| bta-miR-2474 | -17.4 | 117 |
| bta-miR-2474 | -16.5 | 426 |
| bta-miR-2474 | -16.0 | 212 |
| bta-miR-2474 | -15.1 | 692 |
| bta-miR-2474 | -13.9 | 181 |
| bta-miR-2474 | -13.8 | 386 |
| bta-miR-2474 | -13.5 | 605 |
| bta-miR-2474 | -13.4 | 170 |

|               |       |     |
|---------------|-------|-----|
| bta-miR-2474  | -13.2 | 284 |
| bta-miR-2474  | -11.8 | 675 |
| bta-miR-2474  | -10.9 | 85  |
| bta-miR-2474  | -10.8 | 450 |
| bta-miR-2475  | -22.0 | 38  |
| bta-miR-2475  | -20.3 | 362 |
| bta-miR-2475  | -19.8 | 560 |
| bta-miR-2475  | -19.3 | 488 |
| bta-miR-2475  | -18.2 | 654 |
| bta-miR-2475  | -18.2 | 185 |
| bta-miR-2475  | -18.0 | 266 |
| bta-miR-2475  | -17.6 | 116 |
| bta-miR-2475  | -16.9 | 585 |
| bta-miR-2475  | -16.7 | 61  |
| bta-miR-2475  | -15.8 | 13  |
| bta-miR-2475  | -15.7 | 403 |
| bta-miR-2475  | -15.7 | 457 |
| bta-miR-2475  | -15.1 | 136 |
| bta-miR-2475  | -15.1 | 617 |
| bta-miR-2475  | -14.2 | 515 |
| bta-miR-2475  | -13.4 | 81  |
| bta-miR-2475  | -12.9 | 342 |
| bta-miR-2475  | -12.6 | 292 |
| bta-miR-2475  | -12.6 | 682 |
| bta-miR-2475  | -12.0 | 430 |
| bta-miR-2475  | -11.5 | 743 |
| bta-miR-2475  | -11.3 | 547 |
| bta-miR-2475  | -10.6 | 231 |
| bta-miR-2476  | -22.5 | 413 |
| bta-miR-2476  | -22.0 | 108 |
| bta-miR-2476  | -21.8 | 54  |
| bta-miR-2476  | -21.6 | 472 |
| bta-miR-2476  | -21.1 | 568 |
| bta-miR-2476  | -19.0 | 136 |
| bta-miR-2476  | -19.0 | 364 |
| bta-miR-2476  | -17.7 | 263 |
| bta-miR-2476  | -16.4 | 186 |
| bta-miR-2476  | -16.0 | 622 |
| bta-miR-2476  | -15.5 | 5   |
| bta-miR-2476  | -15.3 | 71  |
| bta-miR-2476  | -15.1 | 19  |
| bta-miR-2476  | -14.8 | 699 |
| bta-miR-2476  | -14.4 | 734 |
| bta-miR-2476  | -14.2 | 318 |
| bta-miR-2476  | -14.1 | 650 |
| bta-miR-2476  | -13.7 | 500 |
| bta-miR-2476  | -13.4 | 340 |
| bta-miR-2476  | -13.3 | 125 |
| bta-miR-2476  | -13.1 | 231 |
| bta-miR-2476  | -12.5 | 385 |
| bta-miR-2476  | -12.0 | 456 |
| bta-miR-2476  | -11.7 | 86  |
| bta-miR-2476  | -11.7 | 611 |
| bta-miR-2476  | -11.2 | 298 |
| bta-miR-2476  | -10.6 | 556 |
| bta-miR-2476  | -10.1 | 520 |
| bta-miR-2284o | -20.9 | 166 |
| bta-miR-2284o | -20.9 | 357 |
| bta-miR-2284o | -19.8 | 102 |

|               |       |     |
|---------------|-------|-----|
| bta-miR-2284o | -19.0 | 240 |
| bta-miR-2284o | -18.1 | 620 |
| bta-miR-2284o | -17.6 | 429 |
| bta-miR-2284o | -17.5 | 327 |
| bta-miR-2284o | -17.5 | 405 |
| bta-miR-2284o | -17.5 | 28  |
| bta-miR-2284o | -17.2 | 308 |
| bta-miR-2284o | -16.8 | 69  |
| bta-miR-2284o | -16.6 | 470 |
| bta-miR-2284o | -16.2 | 506 |
| bta-miR-2284o | -15.3 | 273 |
| bta-miR-2284o | -14.6 | 188 |
| bta-miR-2284o | -14.4 | 443 |
| bta-miR-2284o | -14.4 | 592 |
| bta-miR-2284o | -14.2 | 557 |
| bta-miR-2284o | -13.9 | 223 |
| bta-miR-2284o | -13.6 | 320 |
| bta-miR-2284o | -13.3 | 129 |
| bta-miR-2284o | -13.2 | 14  |
| bta-miR-2284o | -12.6 | 342 |
| bta-miR-2284o | -12.6 | 141 |
| bta-miR-2284o | -12.4 | 689 |
| bta-miR-2284o | -12.3 | 90  |
| bta-miR-2284o | -12.1 | 580 |
| bta-miR-2284o | -12.0 | 710 |
| bta-miR-2284o | -10.6 | 461 |
| bta-miR-2284o | -10.6 | 486 |
| bta-miR-2284o | -10.4 | 48  |
| bta-miR-2284o | -10.2 | 214 |
| bta-miR-2477  | -20.8 | 277 |
| bta-miR-2477  | -20.7 | 8   |
| bta-miR-2477  | -20.0 | 81  |
| bta-miR-2477  | -19.7 | 126 |
| bta-miR-2477  | -18.1 | 38  |
| bta-miR-2477  | -17.4 | 376 |
| bta-miR-2477  | -16.7 | 565 |
| bta-miR-2477  | -16.7 | 450 |
| bta-miR-2477  | -16.1 | 235 |
| bta-miR-2477  | -14.9 | 497 |
| bta-miR-2477  | -14.6 | 645 |
| bta-miR-2477  | -14.6 | 114 |
| bta-miR-2477  | -14.5 | 199 |
| bta-miR-2477  | -14.4 | 702 |
| bta-miR-2477  | -13.4 | 154 |
| bta-miR-2477  | -12.7 | 618 |
| bta-miR-2477  | -12.5 | 266 |
| bta-miR-2477  | -12.2 | 737 |
| bta-miR-2477  | -12.1 | 395 |
| bta-miR-2477  | -12.0 | 518 |
| bta-miR-2477  | -12.0 | 539 |
| bta-miR-2477  | -11.7 | 603 |
| bta-miR-2477  | -11.2 | 173 |
| bta-miR-2477  | -11.2 | 343 |
| bta-miR-2477  | -10.7 | 418 |
| bta-miR-2477  | -10.6 | 481 |
| bta-miR-2477  | -10.5 | 681 |
| bta-miR-2477  | -10.5 | 71  |
| bta-miR-2478  | -24.3 | 609 |
| bta-miR-2478  | -22.6 | 7   |

|              |       |     |
|--------------|-------|-----|
| bta-miR-2478 | -22.1 | 40  |
| bta-miR-2478 | -19.6 | 257 |
| bta-miR-2478 | -19.6 | 441 |
| bta-miR-2478 | -17.8 | 93  |
| bta-miR-2478 | -16.2 | 493 |
| bta-miR-2478 | -15.7 | 464 |
| bta-miR-2478 | -15.7 | 408 |
| bta-miR-2478 | -15.1 | 576 |
| bta-miR-2478 | -14.8 | 623 |
| bta-miR-2478 | -13.8 | 231 |
| bta-miR-2478 | -13.2 | 170 |
| bta-miR-2478 | -13.0 | 277 |
| bta-miR-2478 | -12.4 | 356 |
| bta-miR-2478 | -12.3 | 644 |
| bta-miR-2478 | -12.1 | 598 |
| bta-miR-2478 | -10.8 | 215 |
| bta-miR-2478 | -10.5 | 543 |
| bta-miR-2478 | -10.1 | 737 |
| bta-miR-2479 | -17.3 | 441 |
| bta-miR-2479 | -16.2 | 348 |
| bta-miR-2479 | -14.7 | 610 |
| bta-miR-2479 | -13.9 | 174 |
| bta-miR-2479 | -13.2 | 225 |
| bta-miR-2479 | -13.1 | 122 |
| bta-miR-2479 | -12.7 | 268 |
| bta-miR-2479 | -12.6 | 598 |
| bta-miR-2479 | -12.6 | 405 |
| bta-miR-2479 | -12.5 | 723 |
| bta-miR-2479 | -12.4 | 479 |
| bta-miR-2479 | -11.9 | 68  |
| bta-miR-2479 | -11.5 | 506 |
| bta-miR-2479 | -11.2 | 100 |
| bta-miR-2479 | -10.9 | 371 |
| bta-miR-2479 | -10.8 | 197 |
| bta-miR-2479 | -10.6 | 332 |
| bta-miR-2480 | -16.3 | 347 |
| bta-miR-2480 | -14.5 | 591 |
| bta-miR-2480 | -14.4 | 263 |
| bta-miR-2480 | -13.9 | 502 |
| bta-miR-2480 | -13.7 | 150 |
| bta-miR-2480 | -13.6 | 476 |
| bta-miR-2480 | -13.2 | 8   |
| bta-miR-2480 | -12.7 | 215 |
| bta-miR-2480 | -12.7 | 452 |
| bta-miR-2480 | -11.9 | 438 |
| bta-miR-2480 | -11.4 | 395 |
| bta-miR-2480 | -10.9 | 371 |
| bta-miR-2480 | -10.9 | 620 |
| bta-miR-2480 | -10.8 | 170 |
| bta-miR-2480 | -10.6 | 68  |
| bta-miR-2480 | -10.3 | 299 |
| bta-miR-2480 | -10.0 | 97  |
| bta-miR-2481 | -23.7 | 162 |
| bta-miR-2481 | -21.0 | 188 |
| bta-miR-2481 | -20.7 | 48  |
| bta-miR-2481 | -19.8 | 361 |
| bta-miR-2481 | -19.6 | 592 |
| bta-miR-2481 | -19.4 | 480 |
| bta-miR-2481 | -17.9 | 507 |

|               |       |     |
|---------------|-------|-----|
| bta-miR-2481  | -17.5 | 621 |
| bta-miR-2481  | -17.4 | 405 |
| bta-miR-2481  | -17.3 | 241 |
| bta-miR-2481  | -17.0 | 119 |
| bta-miR-2481  | -16.7 | 11  |
| bta-miR-2481  | -16.2 | 429 |
| bta-miR-2481  | -15.6 | 274 |
| bta-miR-2481  | -15.5 | 94  |
| bta-miR-2481  | -15.2 | 338 |
| bta-miR-2481  | -14.8 | 28  |
| bta-miR-2481  | -14.4 | 460 |
| bta-miR-2481  | -13.7 | 216 |
| bta-miR-2481  | -13.6 | 648 |
| bta-miR-2481  | -13.5 | 557 |
| bta-miR-2481  | -12.3 | 142 |
| bta-miR-2481  | -12.0 | 177 |
| bta-miR-2481  | -11.5 | 582 |
| bta-miR-2481  | -11.0 | 110 |
| bta-miR-2481  | -10.5 | 320 |
| bta-miR-2481  | -10.3 | 391 |
| bta-miR-2481  | -10.2 | 135 |
| bta-miR-2481  | -10.2 | 701 |
| bta-miR-2481  | -10.1 | 80  |
| bta-miR-2482  | -18.6 | 599 |
| bta-miR-2482  | -17.1 | 444 |
| bta-miR-2482  | -16.3 | 726 |
| bta-miR-2482  | -15.7 | 365 |
| bta-miR-2482  | -15.4 | 171 |
| bta-miR-2482  | -14.7 | 227 |
| bta-miR-2482  | -14.2 | 93  |
| bta-miR-2482  | -13.7 | 496 |
| bta-miR-2482  | -13.4 | 630 |
| bta-miR-2482  | -13.1 | 333 |
| bta-miR-2482  | -13.1 | 68  |
| bta-miR-2482  | -13.0 | 199 |
| bta-miR-2482  | -12.8 | 270 |
| bta-miR-2482  | -12.4 | 569 |
| bta-miR-2482  | -11.9 | 12  |
| bta-miR-2482  | -11.8 | 119 |
| bta-miR-2482  | -11.6 | 557 |
| bta-miR-2482  | -11.3 | 413 |
| bta-miR-2482  | -11.1 | 149 |
| bta-miR-2482  | -10.3 | 470 |
| bta-miR-2482  | -10.2 | 218 |
| bta-miR-2482  | -10.1 | 615 |
| bta-miR-2483* | -24.7 | 603 |
| bta-miR-2483* | -22.2 | 9   |
| bta-miR-2483* | -21.2 | 419 |
| bta-miR-2483* | -18.8 | 485 |
| bta-miR-2483* | -18.6 | 67  |
| bta-miR-2483* | -18.3 | 623 |
| bta-miR-2483* | -17.6 | 104 |
| bta-miR-2483* | -17.6 | 165 |
| bta-miR-2483* | -17.5 | 651 |
| bta-miR-2483* | -16.5 | 446 |
| bta-miR-2483* | -15.5 | 471 |
| bta-miR-2483* | -15.2 | 559 |
| bta-miR-2483* | -15.1 | 200 |
| bta-miR-2483* | -14.0 | 351 |

|               |       |     |
|---------------|-------|-----|
| bta-miR-2483* | -13.6 | 238 |
| bta-miR-2483* | -13.6 | 731 |
| bta-miR-2483* | -13.0 | 37  |
| bta-miR-2483* | -12.5 | 369 |
| bta-miR-2483* | -12.2 | 272 |
| bta-miR-2483* | -12.0 | 586 |
| bta-miR-2483* | -11.4 | 407 |
| bta-miR-2483* | -10.7 | 539 |
| bta-miR-2483* | -10.7 | 701 |
| bta-miR-2483* | -10.5 | 516 |
| bta-miR-2483* | -10.2 | 147 |
| bta-miR-2483* | -10.1 | 45  |
| bta-miR-2483  | -21.6 | 5   |
| bta-miR-2483  | -21.3 | 396 |
| bta-miR-2483  | -20.8 | 502 |
| bta-miR-2483  | -19.1 | 475 |
| bta-miR-2483  | -18.7 | 107 |
| bta-miR-2483  | -18.3 | 639 |
| bta-miR-2483  | -18.2 | 74  |
| bta-miR-2483  | -17.9 | 421 |
| bta-miR-2483  | -17.6 | 691 |
| bta-miR-2483  | -17.5 | 578 |
| bta-miR-2483  | -17.0 | 211 |
| bta-miR-2483  | -17.0 | 165 |
| bta-miR-2483  | -16.3 | 259 |
| bta-miR-2483  | -15.5 | 25  |
| bta-miR-2483  | -15.3 | 181 |
| bta-miR-2483  | -14.1 | 366 |
| bta-miR-2483  | -14.0 | 45  |
| bta-miR-2483  | -13.8 | 310 |
| bta-miR-2483  | -13.7 | 623 |
| bta-miR-2483  | -13.7 | 456 |
| bta-miR-2483  | -13.5 | 567 |
| bta-miR-2483  | -13.2 | 132 |
| bta-miR-2483  | -12.3 | 603 |
| bta-miR-2483  | -12.2 | 146 |
| bta-miR-2483  | -12.2 | 332 |
| bta-miR-2483  | -12.2 | 665 |
| bta-miR-2483  | -12.2 | 592 |
| bta-miR-2483  | -11.9 | 717 |
| bta-miR-2483  | -11.7 | 99  |
| bta-miR-2483  | -10.0 | 616 |
| bta-miR-2484  | -23.4 | 40  |
| bta-miR-2484  | -21.4 | 606 |
| bta-miR-2484  | -20.8 | 379 |
| bta-miR-2484  | -18.6 | 562 |
| bta-miR-2484  | -17.9 | 266 |
| bta-miR-2484  | -17.5 | 167 |
| bta-miR-2484  | -16.5 | 199 |
| bta-miR-2484  | -16.2 | 644 |
| bta-miR-2484  | -15.9 | 493 |
| bta-miR-2484  | -15.4 | 1   |
| bta-miR-2484  | -14.8 | 457 |
| bta-miR-2484  | -14.2 | 86  |
| bta-miR-2484  | -13.8 | 232 |
| bta-miR-2484  | -13.2 | 293 |
| bta-miR-2484  | -13.0 | 525 |
| bta-miR-2484  | -12.7 | 147 |
| bta-miR-2484  | -12.5 | 20  |



|              |       |     |
|--------------|-------|-----|
| bta-miR-2484 | -12.0 | 344 |
| bta-miR-2484 | -12.0 | 686 |
| bta-miR-2484 | -11.4 | 729 |
| bta-miR-2484 | -11.3 | 428 |
| bta-miR-2484 | -10.8 | 67  |
| bta-miR-2484 | -10.5 | 478 |
| bta-miR-2484 | -10.2 | 118 |
| bta-miR-664  | -32.4 | 144 |
| bta-miR-664  | -27.7 | 97  |
| bta-miR-664  | -25.8 | 317 |
| bta-miR-664  | -25.5 | 409 |
| bta-miR-664  | -23.5 | 18  |
| bta-miR-664  | -23.3 | 377 |
| bta-miR-664  | -23.2 | 235 |
| bta-miR-664  | -23.0 | 459 |
| bta-miR-664  | -22.5 | 353 |
| bta-miR-664  | -21.8 | 120 |
| bta-miR-664  | -21.8 | 191 |
| bta-miR-664  | -21.4 | 561 |
| bta-miR-664  | -21.1 | 501 |
| bta-miR-664  | -19.2 | 258 |
| bta-miR-664  | -18.6 | 584 |
| bta-miR-664  | -18.5 | 299 |
| bta-miR-664  | -18.1 | 650 |
| bta-miR-664  | -16.3 | 53  |
| bta-miR-664  | -15.2 | 169 |
| bta-miR-664  | -15.2 | 429 |
| bta-miR-664  | -14.4 | 485 |
| bta-miR-664  | -14.0 | 1   |
| bta-miR-664  | -13.9 | 84  |
| bta-miR-664  | -13.5 | 525 |
| bta-miR-664  | -13.4 | 681 |
| bta-miR-664  | -13.0 | 626 |
| bta-miR-664  | -11.8 | 137 |
| bta-miR-664  | -11.8 | 739 |
| bta-miR-664  | -11.7 | 181 |
| bta-miR-664  | -10.6 | 401 |
| bta-miR-664  | -10.5 | 705 |
| bta-miR-2485 | -22.1 | 420 |
| bta-miR-2485 | -20.0 | 189 |
| bta-miR-2485 | -19.4 | 490 |
| bta-miR-2485 | -19.2 | 86  |
| bta-miR-2485 | -18.4 | 457 |
| bta-miR-2485 | -18.1 | 594 |
| bta-miR-2485 | -17.9 | 1   |
| bta-miR-2485 | -17.0 | 116 |
| bta-miR-2485 | -16.5 | 367 |
| bta-miR-2485 | -15.7 | 57  |
| bta-miR-2485 | -15.5 | 560 |
| bta-miR-2485 | -14.5 | 624 |
| bta-miR-2485 | -14.5 | 649 |
| bta-miR-2485 | -13.7 | 307 |
| bta-miR-2485 | -13.6 | 579 |
| bta-miR-2485 | -13.4 | 739 |
| bta-miR-2485 | -13.4 | 167 |
| bta-miR-2485 | -12.4 | 261 |
| bta-miR-2485 | -12.2 | 232 |
| bta-miR-2485 | -12.1 | 695 |
| bta-miR-2485 | -11.7 | 341 |

|               |       |     |
|---------------|-------|-----|
| bta-miR-2485  | -11.6 | 510 |
| bta-miR-2485  | -11.2 | 408 |
| bta-miR-2485  | -10.5 | 399 |
| bta-miR-2485  | -10.1 | 549 |
| bta-miR-2284e | -17.7 | 220 |
| bta-miR-2284e | -17.5 | 443 |
| bta-miR-2284e | -15.5 | 83  |
| bta-miR-2284e | -15.0 | 610 |
| bta-miR-2284e | -14.8 | 173 |
| bta-miR-2284e | -14.3 | 240 |
| bta-miR-2284e | -13.7 | 102 |
| bta-miR-2284e | -13.5 | 405 |
| bta-miR-2284e | -13.4 | 596 |
| bta-miR-2284e | -13.0 | 14  |
| bta-miR-2284e | -12.8 | 506 |
| bta-miR-2284e | -12.8 | 348 |
| bta-miR-2284e | -12.8 | 60  |
| bta-miR-2284e | -12.3 | 460 |
| bta-miR-2284e | -12.2 | 710 |
| bta-miR-2284e | -11.7 | 202 |
| bta-miR-2284e | -11.1 | 309 |
| bta-miR-2284e | -11.0 | 566 |
| bta-miR-2284e | -10.7 | 574 |
| bta-miR-2284e | -10.7 | 689 |
| bta-miR-2284e | -10.6 | 629 |
| bta-miR-2284e | -10.5 | 276 |
| bta-miR-2284e | -10.4 | 735 |
| bta-miR-2486  | -25.6 | 163 |
| bta-miR-2486  | -25.3 | 109 |
| bta-miR-2486  | -25.2 | 362 |
| bta-miR-2486  | -23.8 | 324 |
| bta-miR-2486  | -22.2 | 247 |
| bta-miR-2486  | -22.1 | 649 |
| bta-miR-2486  | -22.1 | 624 |
| bta-miR-2486  | -21.5 | 135 |
| bta-miR-2486  | -21.5 | 474 |
| bta-miR-2486  | -21.5 | 561 |
| bta-miR-2486  | -21.3 | 402 |
| bta-miR-2486  | -20.9 | 510 |
| bta-miR-2486  | -20.3 | 52  |
| bta-miR-2486  | -18.3 | 427 |
| bta-miR-2486  | -18.2 | 31  |
| bta-miR-2486  | -17.9 | 299 |
| bta-miR-2486  | -17.3 | 699 |
| bta-miR-2486  | -16.8 | 5   |
| bta-miR-2486  | -16.3 | 586 |
| bta-miR-2486  | -16.1 | 534 |
| bta-miR-2486  | -15.8 | 207 |
| bta-miR-2486  | -12.9 | 737 |
| bta-miR-2486  | -12.7 | 680 |
| bta-miR-2486  | -10.0 | 463 |
| bta-miR-2486  | -10.0 | 524 |
| bta-miR-2486* | -22.3 | 238 |
| bta-miR-2486* | -21.0 | 352 |
| bta-miR-2486* | -20.7 | 419 |
| bta-miR-2486* | -20.6 | 653 |
| bta-miR-2486* | -20.4 | 12  |
| bta-miR-2486* | -20.1 | 199 |
| bta-miR-2486* | -17.7 | 274 |

|               |       |     |
|---------------|-------|-----|
| bta-miR-2486* | -17.5 | 125 |
| bta-miR-2486* | -17.2 | 100 |
| bta-miR-2486* | -17.0 | 171 |
| bta-miR-2486* | -16.9 | 605 |
| bta-miR-2486* | -16.8 | 487 |
| bta-miR-2486* | -16.5 | 694 |
| bta-miR-2486* | -16.3 | 66  |
| bta-miR-2486* | -16.3 | 381 |
| bta-miR-2486* | -16.3 | 456 |
| bta-miR-2486* | -15.4 | 307 |
| bta-miR-2486* | -14.7 | 539 |
| bta-miR-2486* | -14.6 | 83  |
| bta-miR-2486* | -14.3 | 319 |
| bta-miR-2486* | -13.6 | 710 |
| bta-miR-2486* | -13.5 | 137 |
| bta-miR-2486* | -13.2 | 732 |
| bta-miR-2486* | -13.2 | 570 |
| bta-miR-2486* | -13.0 | 2   |
| bta-miR-2486* | -13.0 | 516 |
| bta-miR-2486* | -12.7 | 51  |
| bta-miR-2486* | -12.3 | 149 |
| bta-miR-2486* | -12.1 | 631 |
| bta-miR-2486* | -11.7 | 407 |
| bta-miR-2486* | -11.4 | 118 |
| bta-miR-2486* | -11.4 | 562 |
| bta-miR-2486* | -10.3 | 586 |
| bta-miR-2487  | -34.7 | 419 |
| bta-miR-2487  | -30.1 | 155 |
| bta-miR-2487  | -28.2 | 462 |
| bta-miR-2487  | -25.4 | 596 |
| bta-miR-2487  | -24.6 | 229 |
| bta-miR-2487  | -24.4 | 85  |
| bta-miR-2487  | -23.6 | 352 |
| bta-miR-2487  | -23.5 | 568 |
| bta-miR-2487  | -23.3 | 12  |
| bta-miR-2487  | -22.1 | 658 |
| bta-miR-2487  | -21.5 | 482 |
| bta-miR-2487  | -21.2 | 186 |
| bta-miR-2487  | -20.1 | 738 |
| bta-miR-2487  | -19.9 | 318 |
| bta-miR-2487  | -19.7 | 127 |
| bta-miR-2487  | -18.7 | 510 |
| bta-miR-2487  | -17.6 | 387 |
| bta-miR-2487  | -16.9 | 33  |
| bta-miR-2487  | -16.1 | 257 |
| bta-miR-2487  | -14.7 | 206 |
| bta-miR-2487  | -14.3 | 408 |
| bta-miR-2487  | -14.0 | 543 |
| bta-miR-2487  | -13.5 | 72  |
| bta-miR-2487  | -12.6 | 450 |
| bta-miR-2487  | -12.5 | 634 |
| bta-miR-2487  | -11.9 | 116 |
| bta-miR-2487  | -11.9 | 698 |
| bta-miR-2487  | -11.5 | 304 |
| bta-miR-2487  | -11.3 | 1   |
| bta-miR-2487  | -11.3 | 341 |
| bta-miR-2487  | -11.2 | 271 |
| bta-miR-2488  | -22.5 | 610 |
| bta-miR-2488  | -20.0 | 174 |

|                 |       |     |
|-----------------|-------|-----|
| bta-miR-2488    | -19.3 | 440 |
| bta-miR-2488    | -18.9 | 68  |
| bta-miR-2488    | -17.0 | 479 |
| bta-miR-2488    | -16.2 | 11  |
| bta-miR-2488    | -15.6 | 598 |
| bta-miR-2488    | -15.5 | 218 |
| bta-miR-2488    | -14.8 | 265 |
| bta-miR-2488    | -13.0 | 349 |
| bta-miR-2488    | -12.9 | 630 |
| bta-miR-2488    | -12.9 | 411 |
| bta-miR-2488    | -11.9 | 506 |
| bta-miR-2488    | -11.2 | 28  |
| bta-miR-2488    | -10.4 | 113 |
| bta-miR-2488    | -10.3 | 241 |
| bta-miR-2488    | -10.1 | 154 |
| bta-miR-1388-5p | -24.6 | 59  |
| bta-miR-1388-5p | -21.1 | 214 |
| bta-miR-1388-5p | -21.0 | 396 |
| bta-miR-1388-5p | -19.4 | 262 |
| bta-miR-1388-5p | -19.2 | 7   |
| bta-miR-1388-5p | -19.1 | 476 |
| bta-miR-1388-5p | -19.0 | 607 |
| bta-miR-1388-5p | -17.8 | 449 |
| bta-miR-1388-5p | -17.5 | 107 |
| bta-miR-1388-5p | -17.1 | 703 |
| bta-miR-1388-5p | -16.3 | 35  |
| bta-miR-1388-5p | -15.6 | 370 |
| bta-miR-1388-5p | -15.4 | 276 |
| bta-miR-1388-5p | -14.6 | 578 |
| bta-miR-1388-5p | -14.6 | 539 |
| bta-miR-1388-5p | -14.5 | 170 |
| bta-miR-1388-5p | -13.4 | 432 |
| bta-miR-1388-5p | -13.4 | 345 |
| bta-miR-1388-5p | -13.3 | 629 |
| bta-miR-1388-5p | -13.2 | 656 |
| bta-miR-1388-5p | -12.0 | 94  |
| bta-miR-1388-5p | -11.8 | 200 |
| bta-miR-1388-5p | -11.1 | 740 |
| bta-miR-1388-5p | -10.7 | 513 |
| bta-miR-1388-5p | -10.6 | 240 |
| bta-miR-1388-5p | -10.3 | 26  |
| bta-miR-1388-5p | -10.0 | 128 |
| bta-miR-1388-3p | -28.6 | 415 |
| bta-miR-1388-3p | -27.7 | 109 |
| bta-miR-1388-3p | -27.4 | 614 |
| bta-miR-1388-3p | -25.3 | 69  |
| bta-miR-1388-3p | -24.1 | 478 |
| bta-miR-1388-3p | -23.0 | 266 |
| bta-miR-1388-3p | -22.6 | 172 |
| bta-miR-1388-3p | -22.6 | 583 |
| bta-miR-1388-3p | -22.4 | 7   |
| bta-miR-1388-3p | -18.0 | 448 |
| bta-miR-1388-3p | -17.7 | 359 |
| bta-miR-1388-3p | -16.9 | 554 |
| bta-miR-1388-3p | -16.6 | 155 |
| bta-miR-1388-3p | -16.5 | 38  |
| bta-miR-1388-3p | -16.1 | 337 |
| bta-miR-1388-3p | -16.1 | 220 |
| bta-miR-1388-3p | -16.0 | 658 |

|                 |       |     |
|-----------------|-------|-----|
| bta-miR-1388-3p | -14.5 | 380 |
| bta-miR-1388-3p | -14.4 | 698 |
| bta-miR-1388-3p | -13.8 | 602 |
| bta-miR-1388-3p | -12.5 | 464 |
| bta-miR-1388-3p | -11.7 | 543 |
| bta-miR-1388-3p | -10.9 | 730 |
| bta-miR-1388-3p | -10.6 | 304 |
| bta-miR-1388-3p | -10.2 | 634 |
| bta-miR-1468    | -26.9 | 597 |
| bta-miR-1468    | -25.2 | 263 |
| bta-miR-1468    | -22.2 | 64  |
| bta-miR-1468    | -21.5 | 198 |
| bta-miR-1468    | -19.6 | 482 |
| bta-miR-1468    | -19.5 | 414 |
| bta-miR-1468    | -18.9 | 617 |
| bta-miR-1468    | -18.3 | 165 |
| bta-miR-1468    | -18.2 | 440 |
| bta-miR-1468    | -17.0 | 5   |
| bta-miR-1468    | -16.9 | 100 |
| bta-miR-1468    | -15.8 | 147 |
| bta-miR-1468    | -13.7 | 653 |
| bta-miR-1468    | -13.4 | 736 |
| bta-miR-1468    | -13.3 | 555 |
| bta-miR-1468    | -13.3 | 351 |
| bta-miR-1468    | -12.6 | 116 |
| bta-miR-1468    | -11.5 | 692 |
| bta-miR-1468    | -11.1 | 238 |
| bta-miR-1468    | -10.7 | 182 |
| bta-miR-1468    | -10.6 | 463 |
| bta-miR-1468    | -10.3 | 296 |
| bta-miR-1468    | -10.3 | 516 |
| bta-miR-424     | -21.3 | 350 |
| bta-miR-424     | -18.7 | 722 |
| bta-miR-424     | -18.5 | 103 |
| bta-miR-424     | -15.7 | 165 |
| bta-miR-424     | -15.7 | 405 |
| bta-miR-424     | -15.3 | 599 |
| bta-miR-424     | -15.0 | 9   |
| bta-miR-424     | -14.7 | 573 |
| bta-miR-424     | -14.6 | 81  |
| bta-miR-424     | -14.4 | 544 |
| bta-miR-424     | -14.1 | 469 |
| bta-miR-424     | -13.8 | 437 |
| bta-miR-424     | -12.8 | 194 |
| bta-miR-424     | -12.8 | 516 |
| bta-miR-424     | -12.7 | 225 |
| bta-miR-424     | -12.4 | 267 |
| bta-miR-424     | -11.9 | 45  |
| bta-miR-424     | -11.9 | 650 |
| bta-miR-424     | -11.8 | 371 |
| bta-miR-424     | -11.8 | 626 |
| bta-miR-424     | -10.6 | 299 |
| bta-miR-424     | -10.3 | 696 |
| bta-miR-424     | -10.1 | 332 |
| bta-miR-424*    | -21.8 | 453 |
| bta-miR-424*    | -20.1 | 516 |
| bta-miR-424*    | -19.9 | 63  |
| bta-miR-424*    | -19.5 | 617 |
| bta-miR-424*    | -18.9 | 265 |

|                |       |     |
|----------------|-------|-----|
| bta-miR-424*   | -18.9 | 419 |
| bta-miR-424*   | -18.7 | 12  |
| bta-miR-424*   | -18.6 | 559 |
| bta-miR-424*   | -18.3 | 85  |
| bta-miR-424*   | -17.2 | 494 |
| bta-miR-424*   | -17.0 | 41  |
| bta-miR-424*   | -16.9 | 115 |
| bta-miR-424*   | -16.9 | 198 |
| bta-miR-424*   | -16.6 | 358 |
| bta-miR-424*   | -15.8 | 307 |
| bta-miR-424*   | -15.7 | 653 |
| bta-miR-424*   | -15.3 | 376 |
| bta-miR-424*   | -15.2 | 165 |
| bta-miR-424*   | -15.2 | 230 |
| bta-miR-424*   | -15.1 | 575 |
| bta-miR-424*   | -15.1 | 480 |
| bta-miR-424*   | -15.0 | 407 |
| bta-miR-424*   | -15.0 | 183 |
| bta-miR-424*   | -14.5 | 282 |
| bta-miR-424*   | -14.1 | 605 |
| bta-miR-424*   | -13.8 | 107 |
| bta-miR-424*   | -12.8 | 539 |
| bta-miR-424*   | -12.5 | 29  |
| bta-miR-424*   | -12.3 | 429 |
| bta-miR-424*   | -11.6 | 395 |
| bta-miR-424*   | -11.4 | 741 |
| bta-miR-424*   | -10.5 | 698 |
| bta-miR-424*   | -10.4 | 146 |
| bta-miR-424*   | -10.3 | 669 |
| bta-miR-424*   | -10.3 | 635 |
| bta-miR-542-5p | -26.2 | 352 |
| bta-miR-542-5p | -24.5 | 412 |
| bta-miR-542-5p | -24.4 | 19  |
| bta-miR-542-5p | -22.5 | 583 |
| bta-miR-542-5p | -19.7 | 81  |
| bta-miR-542-5p | -17.9 | 130 |
| bta-miR-542-5p | -17.0 | 378 |
| bta-miR-542-5p | -16.8 | 292 |
| bta-miR-542-5p | -16.8 | 605 |
| bta-miR-542-5p | -16.7 | 657 |
| bta-miR-542-5p | -16.0 | 249 |
| bta-miR-542-5p | -16.0 | 225 |
| bta-miR-542-5p | -15.7 | 494 |
| bta-miR-542-5p | -15.5 | 190 |
| bta-miR-542-5p | -15.0 | 437 |
| bta-miR-542-5p | -13.8 | 542 |
| bta-miR-542-5p | -13.7 | 629 |
| bta-miR-542-5p | -13.4 | 155 |
| bta-miR-542-5p | -13.3 | 323 |
| bta-miR-542-5p | -13.3 | 329 |
| bta-miR-542-5p | -13.3 | 711 |
| bta-miR-542-5p | -13.3 | 738 |
| bta-miR-542-5p | -13.2 | 567 |
| bta-miR-542-5p | -11.9 | 267 |
| bta-miR-542-5p | -11.9 | 40  |
| bta-miR-542-5p | -11.4 | 62  |
| bta-miR-542-5p | -10.9 | 368 |
| bta-miR-542-5p | -10.8 | 475 |
| bta-miR-542-5p | -10.7 | 336 |

|                |       |     |
|----------------|-------|-----|
| bta-miR-542-5p | -10.5 | 1   |
| bta-miR-542-5p | -10.5 | 240 |
| bta-miR-2917   | -17.4 | 37  |
| bta-miR-2917   | -16.7 | 234 |
| bta-miR-2917   | -16.1 | 89  |
| bta-miR-2917   | -15.7 | 4   |
| bta-miR-2917   | -15.6 | 20  |
| bta-miR-2917   | -13.6 | 379 |
| bta-miR-2917   | -13.2 | 539 |
| bta-miR-2917   | -12.9 | 566 |
| bta-miR-2917   | -12.8 | 479 |
| bta-miR-2917   | -12.5 | 401 |
| bta-miR-2917   | -12.4 | 286 |
| bta-miR-2917   | -11.8 | 261 |
| bta-miR-2917   | -11.7 | 342 |
| bta-miR-2917   | -11.5 | 164 |
| bta-miR-2917   | -11.2 | 596 |
| bta-miR-2917   | -11.0 | 517 |
| bta-miR-2917   | -10.9 | 453 |
| bta-miR-2917   | -10.9 | 191 |
| bta-miR-2917   | -10.6 | 143 |
| bta-miR-2917   | -10.4 | 50  |
| bta-miR-2917   | -10.4 | 114 |
| bta-miR-2917   | -10.1 | 657 |
| bta-miR-2917   | -10.0 | 580 |
| bta-miR-2917   | -10.0 | 639 |
| bta-miR-193a   | -25.1 | 419 |
| bta-miR-193a   | -23.8 | 559 |
| bta-miR-193a   | -23.5 | 12  |
| bta-miR-193a   | -21.6 | 85  |
| bta-miR-193a   | -21.1 | 112 |
| bta-miR-193a   | -19.9 | 184 |
| bta-miR-193a   | -19.6 | 155 |
| bta-miR-193a   | -19.2 | 450 |
| bta-miR-193a   | -17.8 | 243 |
| bta-miR-193a   | -17.5 | 308 |
| bta-miR-193a   | -17.3 | 372 |
| bta-miR-193a   | -17.2 | 220 |
| bta-miR-193a   | -17.1 | 498 |
| bta-miR-193a   | -16.2 | 39  |
| bta-miR-193a   | -16.1 | 738 |
| bta-miR-193a   | -16.0 | 473 |
| bta-miR-193a   | -15.5 | 346 |
| bta-miR-193a   | -15.3 | 72  |
| bta-miR-193a   | -15.1 | 623 |
| bta-miR-193a   | -14.5 | 601 |
| bta-miR-193a   | -14.4 | 698 |
| bta-miR-193a   | -14.3 | 582 |
| bta-miR-193a   | -13.9 | 270 |
| bta-miR-193a   | -13.9 | 659 |
| bta-miR-193a   | -12.2 | 413 |
| bta-miR-193a   | -12.0 | 402 |
| bta-miR-193a   | -11.0 | 520 |
| bta-miR-193a   | -10.7 | 172 |
| bta-miR-193a   | -10.4 | 136 |
| bta-miR-193a   | -10.2 | 324 |
| bta-miR-193a   | -10.1 | 364 |
| bta-miR-669    | -25.6 | 10  |
| bta-miR-669    | -25.2 | 369 |

|              |       |     |
|--------------|-------|-----|
| bta-miR-669  | -24.6 | 144 |
| bta-miR-669  | -23.3 | 119 |
| bta-miR-669  | -22.6 | 415 |
| bta-miR-669  | -20.7 | 488 |
| bta-miR-669  | -19.8 | 95  |
| bta-miR-669  | -19.7 | 38  |
| bta-miR-669  | -19.4 | 585 |
| bta-miR-669  | -19.0 | 172 |
| bta-miR-669  | -18.9 | 304 |
| bta-miR-669  | -18.5 | 343 |
| bta-miR-669  | -18.1 | 654 |
| bta-miR-669  | -17.9 | 256 |
| bta-miR-669  | -17.0 | 554 |
| bta-miR-669  | -15.9 | 614 |
| bta-miR-669  | -15.3 | 457 |
| bta-miR-669  | -13.9 | 66  |
| bta-miR-669  | -13.7 | 686 |
| bta-miR-669  | -13.7 | 518 |
| bta-miR-669  | -13.4 | 202 |
| bta-miR-669  | -12.6 | 230 |
| bta-miR-669  | -11.9 | 729 |
| bta-miR-669  | -10.6 | 330 |
| bta-miR-669  | -10.3 | 388 |
| bta-miR-669  | -10.1 | 167 |
| bta-miR-2881 | -33.5 | 308 |
| bta-miR-2881 | -30.5 | 237 |
| bta-miR-2881 | -30.2 | 126 |
| bta-miR-2881 | -27.6 | 459 |
| bta-miR-2881 | -27.1 | 415 |
| bta-miR-2881 | -26.2 | 161 |
| bta-miR-2881 | -25.9 | 561 |
| bta-miR-2881 | -24.8 | 85  |
| bta-miR-2881 | -24.4 | 22  |
| bta-miR-2881 | -23.6 | 384 |
| bta-miR-2881 | -22.0 | 342 |
| bta-miR-2881 | -20.3 | 489 |
| bta-miR-2881 | -17.9 | 51  |
| bta-miR-2881 | -17.8 | 684 |
| bta-miR-2881 | -17.0 | 271 |
| bta-miR-2881 | -16.9 | 199 |
| bta-miR-2881 | -16.8 | 2   |
| bta-miR-2881 | -16.4 | 399 |
| bta-miR-2881 | -16.2 | 654 |
| bta-miR-2881 | -14.0 | 115 |
| bta-miR-2881 | -13.9 | 636 |
| bta-miR-2881 | -13.6 | 739 |
| bta-miR-2881 | -13.4 | 705 |
| bta-miR-2881 | -13.3 | 73  |
| bta-miR-2881 | -12.4 | 624 |
| bta-miR-2881 | -12.2 | 287 |
| bta-miR-2881 | -12.2 | 594 |
| bta-miR-2881 | -11.6 | 522 |
| bta-miR-2881 | -11.6 | 541 |
| bta-miR-2881 | -10.1 | 144 |
| bta-miR-2881 | -10.1 | 483 |
| bta-miR-2882 | -36.6 | 614 |
| bta-miR-2882 | -31.2 | 448 |
| bta-miR-2882 | -30.2 | 67  |
| bta-miR-2882 | -27.9 | 410 |



|              |       |     |
|--------------|-------|-----|
| bta-miR-2882 | -22.3 | 264 |
| bta-miR-2882 | -21.5 | 598 |
| bta-miR-2882 | -20.5 | 10  |
| bta-miR-2882 | -19.2 | 495 |
| bta-miR-2882 | -18.3 | 219 |
| bta-miR-2882 | -17.6 | 170 |
| bta-miR-2882 | -16.3 | 575 |
| bta-miR-2882 | -14.6 | 357 |
| bta-miR-2882 | -14.1 | 429 |
| bta-miR-2882 | -12.6 | 368 |
| bta-miR-2882 | -12.0 | 740 |
| bta-miR-2882 | -11.5 | 142 |
| bta-miR-2882 | -11.0 | 198 |
| bta-miR-2882 | -11.0 | 546 |
| bta-miR-2882 | -10.9 | 663 |
| bta-miR-2882 | -10.8 | 308 |
| bta-miR-2882 | -10.5 | 119 |
| bta-miR-2882 | -10.0 | 566 |
| bta-miR-2883 | -22.5 | 586 |
| bta-miR-2883 | -20.6 | 155 |
| bta-miR-2883 | -20.5 | 464 |
| bta-miR-2883 | -19.2 | 602 |
| bta-miR-2883 | -18.8 | 623 |
| bta-miR-2883 | -18.3 | 419 |
| bta-miR-2883 | -17.4 | 12  |
| bta-miR-2883 | -16.7 | 72  |
| bta-miR-2883 | -14.8 | 483 |
| bta-miR-2883 | -14.8 | 107 |
| bta-miR-2883 | -14.5 | 262 |
| bta-miR-2883 | -13.7 | 211 |
| bta-miR-2883 | -13.6 | 181 |
| bta-miR-2883 | -12.9 | 344 |
| bta-miR-2883 | -12.5 | 377 |
| bta-miR-2883 | -11.8 | 116 |
| bta-miR-2883 | -11.8 | 698 |
| bta-miR-2883 | -11.4 | 139 |
| bta-miR-2883 | -11.3 | 271 |
| bta-miR-2883 | -11.3 | 361 |
| bta-miR-2883 | -11.1 | 310 |
| bta-miR-2883 | -11.1 | 663 |
| bta-miR-2883 | -11.0 | 41  |
| bta-miR-2883 | -11.0 | 86  |
| bta-miR-2883 | -11.0 | 560 |
| bta-miR-2883 | -11.0 | 614 |
| bta-miR-2883 | -10.6 | 294 |
| bta-miR-2883 | -10.5 | 193 |
| bta-miR-2885 | -37.6 | 109 |
| bta-miR-2885 | -27.9 | 30  |
| bta-miR-2885 | -27.7 | 408 |
| bta-miR-2885 | -27.3 | 539 |
| bta-miR-2885 | -26.2 | 73  |
| bta-miR-2885 | -24.8 | 577 |
| bta-miR-2885 | -24.4 | 244 |
| bta-miR-2885 | -23.9 | 167 |
| bta-miR-2885 | -23.4 | 457 |
| bta-miR-2885 | -21.7 | 361 |
| bta-miR-2885 | -21.1 | 12  |
| bta-miR-2885 | -19.9 | 654 |
| bta-miR-2885 | -19.1 | 307 |

|              |       |     |
|--------------|-------|-----|
| bta-miR-2885 | -18.8 | 624 |
| bta-miR-2885 | -18.7 | 513 |
| bta-miR-2885 | -17.8 | 51  |
| bta-miR-2885 | -17.8 | 483 |
| bta-miR-2885 | -16.9 | 329 |
| bta-miR-2885 | -16.9 | 740 |
| bta-miR-2885 | -16.5 | 134 |
| bta-miR-2885 | -16.3 | 262 |
| bta-miR-2885 | -14.6 | 188 |
| bta-miR-2885 | -14.0 | 431 |
| bta-miR-2885 | -13.1 | 395 |
| bta-miR-2885 | -12.7 | 209 |
| bta-miR-2885 | -12.3 | 605 |
| bta-miR-2885 | -11.6 | 707 |
| bta-miR-2885 | -11.2 | 448 |
| bta-miR-2885 | -11.2 | 502 |
| bta-miR-2885 | -11.1 | 682 |
| bta-miR-2885 | -10.9 | 2   |
| bta-miR-2885 | -10.7 | 96  |
| bta-miR-2885 | -10.3 | 156 |
| bta-miR-2886 | -25.6 | 412 |
| bta-miR-2886 | -24.2 | 70  |
| bta-miR-2886 | -24.1 | 7   |
| bta-miR-2886 | -24.0 | 609 |
| bta-miR-2886 | -21.5 | 473 |
| bta-miR-2886 | -21.3 | 266 |
| bta-miR-2886 | -20.2 | 359 |
| bta-miR-2886 | -20.0 | 25  |
| bta-miR-2886 | -19.1 | 560 |
| bta-miR-2886 | -18.5 | 438 |
| bta-miR-2886 | -16.8 | 659 |
| bta-miR-2886 | -16.7 | 497 |
| bta-miR-2886 | -16.3 | 107 |
| bta-miR-2886 | -15.7 | 738 |
| bta-miR-2886 | -14.9 | 167 |
| bta-miR-2886 | -14.9 | 588 |
| bta-miR-2886 | -14.2 | 628 |
| bta-miR-2886 | -12.4 | 462 |
| bta-miR-2886 | -12.3 | 543 |
| bta-miR-2886 | -12.0 | 185 |
| bta-miR-2886 | -11.7 | 155 |
| bta-miR-2886 | -11.3 | 51  |
| bta-miR-2886 | -10.5 | 88  |
| bta-miR-2886 | -10.5 | 404 |
| bta-miR-2886 | -10.1 | 231 |
| bta-miR-2886 | -10.1 | 524 |
| bta-miR-2887 | -30.0 | 560 |
| bta-miR-2887 | -29.9 | 494 |
| bta-miR-2887 | -27.2 | 418 |
| bta-miR-2887 | -26.8 | 449 |
| bta-miR-2887 | -25.6 | 119 |
| bta-miR-2887 | -23.8 | 66  |
| bta-miR-2887 | -23.0 | 22  |
| bta-miR-2887 | -22.8 | 235 |
| bta-miR-2887 | -22.3 | 341 |
| bta-miR-2887 | -21.3 | 148 |
| bta-miR-2887 | -21.0 | 584 |
| bta-miR-2887 | -20.6 | 319 |
| bta-miR-2887 | -20.0 | 654 |

|              |       |     |
|--------------|-------|-----|
| bta-miR-2887 | -19.8 | 381 |
| bta-miR-2887 | -19.1 | 102 |
| bta-miR-2887 | -18.1 | 622 |
| bta-miR-2887 | -17.8 | 199 |
| bta-miR-2887 | -17.5 | 172 |
| bta-miR-2887 | -17.4 | 473 |
| bta-miR-2887 | -17.0 | 271 |
| bta-miR-2887 | -15.5 | 698 |
| bta-miR-2887 | -14.6 | 740 |
| bta-miR-2887 | -14.2 | 515 |
| bta-miR-2887 | -13.8 | 606 |
| bta-miR-2887 | -13.5 | 308 |
| bta-miR-2887 | -13.1 | 4   |
| bta-miR-2887 | -13.1 | 401 |
| bta-miR-2887 | -12.9 | 51  |
| bta-miR-2887 | -12.1 | 635 |
| bta-miR-2887 | -11.4 | 371 |
| bta-miR-2887 | -10.9 | 539 |
| bta-miR-2888 | -35.8 | 318 |
| bta-miR-2888 | -34.3 | 127 |
| bta-miR-2888 | -27.4 | 157 |
| bta-miR-2888 | -25.3 | 237 |
| bta-miR-2888 | -24.9 | 29  |
| bta-miR-2888 | -23.8 | 107 |
| bta-miR-2888 | -23.1 | 462 |
| bta-miR-2888 | -22.0 | 572 |
| bta-miR-2888 | -20.9 | 186 |
| bta-miR-2888 | -20.6 | 419 |
| bta-miR-2888 | -19.9 | 360 |
| bta-miR-2888 | -19.9 | 509 |
| bta-miR-2888 | -19.0 | 635 |
| bta-miR-2888 | -18.5 | 85  |
| bta-miR-2888 | -18.4 | 392 |
| bta-miR-2888 | -17.6 | 282 |
| bta-miR-2888 | -17.5 | 688 |
| bta-miR-2888 | -14.3 | 374 |
| bta-miR-2888 | -13.8 | 305 |
| bta-miR-2888 | -13.6 | 556 |
| bta-miR-2888 | -13.4 | 670 |
| bta-miR-2888 | -12.9 | 711 |
| bta-miR-2888 | -12.2 | 1   |
| bta-miR-2888 | -11.4 | 623 |
| bta-miR-2888 | -11.3 | 738 |
| bta-miR-2888 | -10.9 | 144 |
| bta-miR-2888 | -10.8 | 485 |
| bta-miR-2888 | -10.0 | 272 |
| bta-miR-2889 | -37.3 | 617 |
| bta-miR-2889 | -34.2 | 462 |
| bta-miR-2889 | -33.9 | 415 |
| bta-miR-2889 | -28.4 | 61  |
| bta-miR-2889 | -26.1 | 8   |
| bta-miR-2889 | -25.5 | 231 |
| bta-miR-2889 | -25.0 | 155 |
| bta-miR-2889 | -24.8 | 99  |
| bta-miR-2889 | -22.9 | 356 |
| bta-miR-2889 | -22.5 | 586 |
| bta-miR-2889 | -21.1 | 494 |
| bta-miR-2889 | -20.1 | 185 |
| bta-miR-2889 | -18.7 | 38  |

|              |       |     |
|--------------|-------|-----|
| bta-miR-2889 | -17.8 | 280 |
| bta-miR-2889 | -17.7 | 119 |
| bta-miR-2889 | -16.6 | 560 |
| bta-miR-2889 | -16.4 | 654 |
| bta-miR-2889 | -15.4 | 454 |
| bta-miR-2889 | -15.3 | 308 |
| bta-miR-2889 | -14.1 | 740 |
| bta-miR-2889 | -13.4 | 89  |
| bta-miR-2889 | -13.0 | 515 |
| bta-miR-2889 | -12.6 | 321 |
| bta-miR-2889 | -12.6 | 386 |
| bta-miR-2889 | -12.4 | 141 |
| bta-miR-2889 | -12.0 | 402 |
| bta-miR-2889 | -11.8 | 710 |
| bta-miR-2889 | -10.4 | 342 |
| bta-miR-2890 | -38.3 | 604 |
| bta-miR-2890 | -29.1 | 66  |
| bta-miR-2890 | -28.8 | 11  |
| bta-miR-2890 | -28.6 | 418 |
| bta-miR-2890 | -25.8 | 451 |
| bta-miR-2890 | -23.1 | 234 |
| bta-miR-2890 | -22.0 | 109 |
| bta-miR-2890 | -20.8 | 575 |
| bta-miR-2890 | -19.9 | 154 |
| bta-miR-2890 | -18.2 | 488 |
| bta-miR-2890 | -17.2 | 408 |
| bta-miR-2890 | -16.2 | 548 |
| bta-miR-2890 | -15.8 | 654 |
| bta-miR-2890 | -15.6 | 628 |
| bta-miR-2890 | -15.6 | 358 |
| bta-miR-2890 | -15.2 | 277 |
| bta-miR-2890 | -14.9 | 199 |
| bta-miR-2890 | -13.5 | 737 |
| bta-miR-2890 | -10.8 | 308 |
| bta-miR-2890 | -10.7 | 126 |
| bta-miR-2890 | -10.6 | 517 |
| bta-miR-2890 | -10.3 | 342 |
| bta-miR-2890 | -10.0 | 44  |
| bta-miR-2891 | -25.7 | 155 |
| bta-miR-2891 | -23.3 | 419 |
| bta-miR-2891 | -21.7 | 229 |
| bta-miR-2891 | -21.2 | 85  |
| bta-miR-2891 | -19.9 | 364 |
| bta-miR-2891 | -19.2 | 456 |
| bta-miR-2891 | -17.9 | 179 |
| bta-miR-2891 | -17.5 | 559 |
| bta-miR-2891 | -17.2 | 112 |
| bta-miR-2891 | -16.2 | 12  |
| bta-miR-2891 | -16.0 | 205 |
| bta-miR-2891 | -15.6 | 387 |
| bta-miR-2891 | -15.1 | 509 |
| bta-miR-2891 | -15.0 | 698 |
| bta-miR-2891 | -14.8 | 623 |
| bta-miR-2891 | -14.8 | 482 |
| bta-miR-2891 | -14.8 | 586 |
| bta-miR-2891 | -14.2 | 57  |
| bta-miR-2891 | -14.2 | 302 |
| bta-miR-2891 | -14.1 | 327 |
| bta-miR-2891 | -13.8 | 340 |

|              |       |     |
|--------------|-------|-----|
| bta-miR-2891 | -13.6 | 243 |
| bta-miR-2891 | -13.5 | 646 |
| bta-miR-2891 | -12.9 | 270 |
| bta-miR-2891 | -12.9 | 131 |
| bta-miR-2891 | -12.1 | 408 |
| bta-miR-2891 | -11.8 | 734 |
| bta-miR-2891 | -11.5 | 36  |
| bta-miR-2891 | -11.5 | 50  |
| bta-miR-2891 | -11.1 | 253 |
| bta-miR-2892 | -32.9 | 448 |
| bta-miR-2892 | -29.2 | 614 |
| bta-miR-2892 | -26.3 | 69  |
| bta-miR-2892 | -24.7 | 12  |
| bta-miR-2892 | -24.4 | 418 |
| bta-miR-2892 | -21.5 | 548 |
| bta-miR-2892 | -21.1 | 371 |
| bta-miR-2892 | -20.8 | 268 |
| bta-miR-2892 | -20.7 | 232 |
| bta-miR-2892 | -20.3 | 114 |
| bta-miR-2892 | -19.7 | 176 |
| bta-miR-2892 | -19.5 | 41  |
| bta-miR-2892 | -19.1 | 577 |
| bta-miR-2892 | -18.5 | 663 |
| bta-miR-2892 | -18.2 | 506 |
| bta-miR-2892 | -17.1 | 359 |
| bta-miR-2892 | -15.8 | 399 |
| bta-miR-2892 | -13.9 | 742 |
| bta-miR-2892 | -13.6 | 156 |
| bta-miR-2892 | -13.6 | 311 |
| bta-miR-2892 | -13.5 | 634 |
| bta-miR-2892 | -13.5 | 209 |
| bta-miR-2892 | -13.4 | 257 |
| bta-miR-2892 | -13.4 | 691 |
| bta-miR-2892 | -13.4 | 130 |
| bta-miR-2892 | -13.3 | 523 |
| bta-miR-2892 | -12.6 | 1   |
| bta-miR-2892 | -11.2 | 342 |
| bta-miR-2892 | -10.8 | 598 |
| bta-miR-2892 | -10.4 | 488 |
| bta-miR-2893 | -31.0 | 110 |
| bta-miR-2893 | -23.1 | 368 |
| bta-miR-2893 | -22.6 | 168 |
| bta-miR-2893 | -22.4 | 260 |
| bta-miR-2893 | -22.2 | 416 |
| bta-miR-2893 | -22.0 | 502 |
| bta-miR-2893 | -21.5 | 14  |
| bta-miR-2893 | -21.3 | 572 |
| bta-miR-2893 | -21.0 | 309 |
| bta-miR-2893 | -20.4 | 461 |
| bta-miR-2893 | -20.1 | 82  |
| bta-miR-2893 | -19.6 | 204 |
| bta-miR-2893 | -19.1 | 627 |
| bta-miR-2893 | -16.3 | 707 |
| bta-miR-2893 | -15.5 | 596 |
| bta-miR-2893 | -15.3 | 139 |
| bta-miR-2893 | -15.2 | 682 |
| bta-miR-2893 | -14.9 | 39  |
| bta-miR-2893 | -14.7 | 481 |
| bta-miR-2893 | -14.3 | 650 |

|              |       |     |
|--------------|-------|-----|
| bta-miR-2893 | -14.1 | 521 |
| bta-miR-2893 | -13.9 | 71  |
| bta-miR-2893 | -13.7 | 541 |
| bta-miR-2893 | -13.1 | 329 |
| bta-miR-2893 | -12.9 | 236 |
| bta-miR-2893 | -11.9 | 614 |
| bta-miR-2893 | -11.7 | 622 |
| bta-miR-2893 | -10.9 | 1   |
| bta-miR-2893 | -10.7 | 449 |
| bta-miR-2893 | -10.6 | 362 |
| bta-miR-2893 | -10.5 | 58  |
| bta-miR-2893 | -10.5 | 431 |
| bta-miR-2893 | -10.4 | 163 |
| bta-miR-2893 | -10.4 | 740 |
| bta-miR-2894 | -31.7 | 408 |
| bta-miR-2894 | -30.9 | 590 |
| bta-miR-2894 | -26.4 | 56  |
| bta-miR-2894 | -24.3 | 619 |
| bta-miR-2894 | -23.9 | 266 |
| bta-miR-2894 | -23.8 | 93  |
| bta-miR-2894 | -22.9 | 464 |
| bta-miR-2894 | -22.7 | 494 |
| bta-miR-2894 | -21.5 | 441 |
| bta-miR-2894 | -21.4 | 12  |
| bta-miR-2894 | -20.2 | 229 |
| bta-miR-2894 | -18.1 | 161 |
| bta-miR-2894 | -17.3 | 661 |
| bta-miR-2894 | -15.3 | 354 |
| bta-miR-2894 | -14.9 | 40  |
| bta-miR-2894 | -14.4 | 738 |
| bta-miR-2894 | -13.8 | 118 |
| bta-miR-2894 | -13.6 | 569 |
| bta-miR-2894 | -12.7 | 199 |
| bta-miR-2894 | -11.6 | 560 |
| bta-miR-2894 | -10.9 | 429 |
| bta-miR-2894 | -10.9 | 155 |
| bta-miR-2894 | -10.2 | 377 |
| bta-miR-2895 | -21.8 | 433 |
| bta-miR-2895 | -21.8 | 252 |
| bta-miR-2895 | -21.1 | 588 |
| bta-miR-2895 | -19.3 | 15  |
| bta-miR-2895 | -17.6 | 611 |
| bta-miR-2895 | -16.7 | 404 |
| bta-miR-2895 | -16.7 | 93  |
| bta-miR-2895 | -16.3 | 64  |
| bta-miR-2895 | -16.0 | 497 |
| bta-miR-2895 | -15.4 | 178 |
| bta-miR-2895 | -14.7 | 370 |
| bta-miR-2895 | -14.3 | 658 |
| bta-miR-2895 | -14.3 | 478 |
| bta-miR-2895 | -14.3 | 544 |
| bta-miR-2895 | -14.2 | 223 |
| bta-miR-2895 | -14.0 | 70  |
| bta-miR-2895 | -13.3 | 337 |
| bta-miR-2895 | -11.8 | 452 |
| bta-miR-2895 | -11.6 | 1   |
| bta-miR-2895 | -11.6 | 202 |
| bta-miR-2895 | -11.3 | 170 |
| bta-miR-2895 | -11.2 | 633 |

|              |       |     |
|--------------|-------|-----|
| bta-miR-2895 | -11.1 | 277 |
| bta-miR-2895 | -10.9 | 42  |
| bta-miR-2895 | -10.8 | 730 |
| bta-miR-2895 | -10.6 | 518 |
| bta-miR-2895 | -10.0 | 562 |
| bta-miR-2896 | -22.3 | 417 |
| bta-miR-2896 | -19.8 | 481 |
| bta-miR-2896 | -19.2 | 370 |
| bta-miR-2896 | -19.0 | 71  |
| bta-miR-2896 | -18.6 | 229 |
| bta-miR-2896 | -18.3 | 630 |
| bta-miR-2896 | -18.2 | 113 |
| bta-miR-2896 | -17.2 | 40  |
| bta-miR-2896 | -17.2 | 280 |
| bta-miR-2896 | -16.9 | 560 |
| bta-miR-2896 | -16.8 | 661 |
| bta-miR-2896 | -16.4 | 17  |
| bta-miR-2896 | -16.4 | 1   |
| bta-miR-2896 | -15.6 | 576 |
| bta-miR-2896 | -15.4 | 497 |
| bta-miR-2896 | -15.1 | 299 |
| bta-miR-2896 | -15.1 | 738 |
| bta-miR-2896 | -15.1 | 709 |
| bta-miR-2896 | -14.1 | 176 |
| bta-miR-2896 | -14.0 | 686 |
| bta-miR-2896 | -13.4 | 543 |
| bta-miR-2896 | -12.9 | 350 |
| bta-miR-2896 | -12.8 | 454 |
| bta-miR-2896 | -11.9 | 599 |
| bta-miR-2896 | -11.6 | 617 |
| bta-miR-2896 | -11.6 | 518 |
| bta-miR-2896 | -11.5 | 204 |
| bta-miR-2896 | -10.9 | 155 |
| bta-miR-2896 | -10.9 | 269 |
| bta-miR-2896 | -10.9 | 399 |
| bta-miR-2896 | -10.6 | 130 |
| bta-miR-2897 | -28.1 | 262 |
| bta-miR-2897 | -28.0 | 81  |
| bta-miR-2897 | -26.9 | 310 |
| bta-miR-2897 | -26.8 | 498 |
| bta-miR-2897 | -25.4 | 416 |
| bta-miR-2897 | -24.3 | 617 |
| bta-miR-2897 | -23.1 | 9   |
| bta-miR-2897 | -22.7 | 112 |
| bta-miR-2897 | -22.6 | 448 |
| bta-miR-2897 | -22.0 | 475 |
| bta-miR-2897 | -21.0 | 155 |
| bta-miR-2897 | -20.1 | 39  |
| bta-miR-2897 | -19.7 | 542 |
| bta-miR-2897 | -18.9 | 356 |
| bta-miR-2897 | -18.6 | 231 |
| bta-miR-2897 | -18.4 | 386 |
| bta-miR-2897 | -17.9 | 70  |
| bta-miR-2897 | -17.8 | 176 |
| bta-miR-2897 | -17.2 | 657 |
| bta-miR-2897 | -16.2 | 576 |
| bta-miR-2897 | -15.8 | 686 |
| bta-miR-2897 | -14.4 | 142 |
| bta-miR-2897 | -14.2 | 208 |

|              |       |     |
|--------------|-------|-----|
| bta-miR-2897 | -13.6 | 708 |
| bta-miR-2897 | -13.0 | 597 |
| bta-miR-2897 | -12.5 | 738 |
| bta-miR-2897 | -11.6 | 329 |
| bta-miR-2897 | -10.4 | 1   |
| bta-miR-2897 | -10.4 | 371 |
| bta-miR-2897 | -10.3 | 286 |
| bta-miR-2898 | -25.4 | 32  |
| bta-miR-2898 | -23.5 | 110 |
| bta-miR-2898 | -22.5 | 133 |
| bta-miR-2898 | -22.0 | 309 |
| bta-miR-2898 | -21.7 | 572 |
| bta-miR-2898 | -21.5 | 461 |
| bta-miR-2898 | -20.7 | 259 |
| bta-miR-2898 | -19.6 | 362 |
| bta-miR-2898 | -19.1 | 416 |
| bta-miR-2898 | -17.3 | 650 |
| bta-miR-2898 | -17.2 | 163 |
| bta-miR-2898 | -17.2 | 322 |
| bta-miR-2898 | -17.2 | 502 |
| bta-miR-2898 | -16.9 | 191 |
| bta-miR-2898 | -16.8 | 90  |
| bta-miR-2898 | -16.5 | 681 |
| bta-miR-2898 | -16.4 | 707 |
| bta-miR-2898 | -16.3 | 626 |
| bta-miR-2898 | -15.6 | 740 |
| bta-miR-2898 | -15.2 | 540 |
| bta-miR-2898 | -14.0 | 521 |
| bta-miR-2898 | -13.9 | 488 |
| bta-miR-2898 | -13.5 | 430 |
| bta-miR-2898 | -13.4 | 14  |
| bta-miR-2898 | -13.1 | 236 |
| bta-miR-2898 | -12.9 | 596 |
| bta-miR-2898 | -12.0 | 60  |
| bta-miR-2898 | -11.8 | 605 |
| bta-miR-2898 | -11.2 | 286 |
| bta-miR-2898 | -10.5 | 177 |
| bta-miR-2898 | -10.0 | 146 |
| bta-miR-2899 | -34.2 | 107 |
| bta-miR-2899 | -28.9 | 416 |
| bta-miR-2899 | -27.7 | 157 |
| bta-miR-2899 | -26.7 | 317 |
| bta-miR-2899 | -26.0 | 567 |
| bta-miR-2899 | -24.4 | 467 |
| bta-miR-2899 | -22.1 | 236 |
| bta-miR-2899 | -22.0 | 9   |
| bta-miR-2899 | -21.6 | 27  |
| bta-miR-2899 | -21.1 | 127 |
| bta-miR-2899 | -20.9 | 361 |
| bta-miR-2899 | -19.5 | 391 |
| bta-miR-2899 | -19.3 | 498 |
| bta-miR-2899 | -18.8 | 650 |
| bta-miR-2899 | -17.9 | 186 |
| bta-miR-2899 | -17.0 | 72  |
| bta-miR-2899 | -16.7 | 274 |
| bta-miR-2899 | -16.3 | 734 |
| bta-miR-2899 | -15.9 | 699 |
| bta-miR-2899 | -15.6 | 587 |
| bta-miR-2899 | -13.7 | 623 |



|              |       |     |
|--------------|-------|-----|
| bta-miR-2899 | -13.6 | 55  |
| bta-miR-2899 | -13.6 | 516 |
| bta-miR-2899 | -13.5 | 299 |
| bta-miR-2899 | -13.4 | 332 |
| bta-miR-2899 | -13.1 | 541 |
| bta-miR-2899 | -12.7 | 456 |
| bta-miR-2899 | -12.5 | 372 |
| bta-miR-2899 | -12.5 | 207 |
| bta-miR-2899 | -11.9 | 561 |
| bta-miR-2899 | -11.8 | 261 |
| bta-miR-2899 | -11.7 | 431 |
| bta-miR-2899 | -10.5 | 93  |
| bta-miR-2900 | -35.9 | 409 |
| bta-miR-2900 | -26.5 | 98  |
| bta-miR-2900 | -26.4 | 236 |
| bta-miR-2900 | -25.4 | 461 |
| bta-miR-2900 | -25.3 | 559 |
| bta-miR-2900 | -24.3 | 34  |
| bta-miR-2900 | -22.3 | 316 |
| bta-miR-2900 | -22.1 | 143 |
| bta-miR-2900 | -22.0 | 390 |
| bta-miR-2900 | -20.7 | 67  |
| bta-miR-2900 | -20.6 | 513 |
| bta-miR-2900 | -20.2 | 342 |
| bta-miR-2900 | -20.0 | 580 |
| bta-miR-2900 | -19.4 | 657 |
| bta-miR-2900 | -19.2 | 541 |
| bta-miR-2900 | -18.6 | 14  |
| bta-miR-2900 | -16.9 | 740 |
| bta-miR-2900 | -16.6 | 191 |
| bta-miR-2900 | -15.9 | 2   |
| bta-miR-2900 | -15.5 | 263 |
| bta-miR-2900 | -15.0 | 285 |
| bta-miR-2900 | -14.4 | 691 |
| bta-miR-2900 | -14.4 | 128 |
| bta-miR-2900 | -14.3 | 368 |
| bta-miR-2900 | -14.1 | 492 |
| bta-miR-2900 | -14.1 | 617 |
| bta-miR-2900 | -11.6 | 170 |
| bta-miR-2900 | -10.6 | 628 |
| bta-miR-2900 | -10.4 | 433 |
| bta-miR-2900 | -10.2 | 55  |
| bta-miR-2901 | -28.8 | 608 |
| bta-miR-2901 | -28.2 | 70  |
| bta-miR-2901 | -26.9 | 472 |
| bta-miR-2901 | -24.1 | 262 |
| bta-miR-2901 | -21.8 | 440 |
| bta-miR-2901 | -20.7 | 407 |
| bta-miR-2901 | -20.6 | 171 |
| bta-miR-2901 | -20.4 | 496 |
| bta-miR-2901 | -19.4 | 20  |
| bta-miR-2901 | -19.0 | 584 |
| bta-miR-2901 | -18.4 | 199 |
| bta-miR-2901 | -18.2 | 358 |
| bta-miR-2901 | -17.4 | 114 |
| bta-miR-2901 | -17.1 | 559 |
| bta-miR-2901 | -16.5 | 654 |
| bta-miR-2901 | -15.6 | 343 |
| bta-miR-2901 | -15.2 | 220 |

|              |       |     |
|--------------|-------|-----|
| bta-miR-2901 | -14.5 | 525 |
| bta-miR-2901 | -14.5 | 308 |
| bta-miR-2901 | -14.3 | 695 |
| bta-miR-2901 | -14.0 | 425 |
| bta-miR-2901 | -13.6 | 631 |
| bta-miR-2901 | -13.5 | 42  |
| bta-miR-2901 | -12.8 | 240 |
| bta-miR-2901 | -12.1 | 388 |
| bta-miR-2901 | -11.9 | 2   |
| bta-miR-2901 | -11.5 | 281 |
| bta-miR-2901 | -10.6 | 137 |
| bta-miR-2901 | -10.6 | 741 |
| bta-miR-2902 | -32.0 | 468 |
| bta-miR-2902 | -29.8 | 92  |
| bta-miR-2902 | -28.1 | 163 |
| bta-miR-2902 | -26.0 | 55  |
| bta-miR-2902 | -25.2 | 426 |
| bta-miR-2902 | -24.4 | 572 |
| bta-miR-2902 | -23.4 | 324 |
| bta-miR-2902 | -23.2 | 259 |
| bta-miR-2902 | -21.6 | 386 |
| bta-miR-2902 | -21.4 | 135 |
| bta-miR-2902 | -20.2 | 209 |
| bta-miR-2902 | -19.4 | 5   |
| bta-miR-2902 | -18.7 | 364 |
| bta-miR-2902 | -18.7 | 624 |
| bta-miR-2902 | -18.4 | 236 |
| bta-miR-2902 | -18.1 | 650 |
| bta-miR-2902 | -18.0 | 510 |
| bta-miR-2902 | -16.6 | 33  |
| bta-miR-2902 | -16.3 | 308 |
| bta-miR-2902 | -15.6 | 615 |
| bta-miR-2902 | -15.2 | 699 |
| bta-miR-2902 | -14.2 | 190 |
| bta-miR-2902 | -13.6 | 549 |
| bta-miR-2902 | -12.9 | 125 |
| bta-miR-2902 | -12.8 | 608 |
| bta-miR-2902 | -12.5 | 495 |
| bta-miR-2902 | -12.1 | 411 |
| bta-miR-2902 | -12.0 | 739 |
| bta-miR-2902 | -11.9 | 246 |
| bta-miR-2902 | -10.9 | 461 |
| bta-miR-2903 | -23.1 | 605 |
| bta-miR-2903 | -20.8 | 420 |
| bta-miR-2903 | -19.8 | 38  |
| bta-miR-2903 | -19.8 | 477 |
| bta-miR-2903 | -19.2 | 13  |
| bta-miR-2903 | -18.7 | 369 |
| bta-miR-2903 | -18.2 | 266 |
| bta-miR-2903 | -17.5 | 560 |
| bta-miR-2903 | -17.3 | 623 |
| bta-miR-2903 | -16.9 | 155 |
| bta-miR-2903 | -16.8 | 73  |
| bta-miR-2903 | -16.6 | 185 |
| bta-miR-2903 | -16.2 | 231 |
| bta-miR-2903 | -14.7 | 454 |
| bta-miR-2903 | -14.5 | 654 |
| bta-miR-2903 | -14.5 | 346 |
| bta-miR-2903 | -13.2 | 109 |

|               |       |     |
|---------------|-------|-----|
| bta-miR-2903  | -12.8 | 740 |
| bta-miR-2903  | -12.8 | 542 |
| bta-miR-2903  | -12.7 | 504 |
| bta-miR-2903  | -11.3 | 413 |
| bta-miR-2903  | -10.3 | 525 |
| bta-miR-2903  | -10.0 | 92  |
| bta-miR-2903  | -10.0 | 597 |
| bta-miR-2904  | -27.9 | 70  |
| bta-miR-2904  | -25.5 | 154 |
| bta-miR-2904  | -25.5 | 414 |
| bta-miR-2904  | -25.3 | 563 |
| bta-miR-2904  | -25.2 | 114 |
| bta-miR-2904  | -23.8 | 480 |
| bta-miR-2904  | -23.6 | 604 |
| bta-miR-2904  | -23.0 | 16  |
| bta-miR-2904  | -22.8 | 268 |
| bta-miR-2904  | -21.7 | 454 |
| bta-miR-2904  | -21.0 | 233 |
| bta-miR-2904  | -19.3 | 698 |
| bta-miR-2904  | -18.8 | 348 |
| bta-miR-2904  | -17.9 | 202 |
| bta-miR-2904  | -16.3 | 630 |
| bta-miR-2904  | -16.2 | 308 |
| bta-miR-2904  | -14.9 | 586 |
| bta-miR-2904  | -14.4 | 41  |
| bta-miR-2904  | -14.2 | 371 |
| bta-miR-2904  | -14.0 | 738 |
| bta-miR-2904  | -13.4 | 4   |
| bta-miR-2904  | -13.1 | 136 |
| bta-miR-2904  | -12.3 | 324 |
| bta-miR-2904  | -12.2 | 252 |
| bta-miR-2904  | -12.0 | 395 |
| bta-miR-2904  | -11.8 | 439 |
| bta-miR-2904  | -11.4 | 107 |
| bta-miR-2904  | -11.2 | 517 |
| bta-miR-2904  | -11.1 | 539 |
| bta-miR-2904  | -10.5 | 340 |
| bta-miR-2284w | -21.9 | 350 |
| bta-miR-2284w | -20.9 | 240 |
| bta-miR-2284w | -20.8 | 452 |
| bta-miR-2284w | -19.0 | 101 |
| bta-miR-2284w | -18.9 | 592 |
| bta-miR-2284w | -18.7 | 197 |
| bta-miR-2284w | -18.2 | 620 |
| bta-miR-2284w | -17.8 | 506 |
| bta-miR-2284w | -17.2 | 479 |
| bta-miR-2284w | -16.8 | 166 |
| bta-miR-2284w | -16.5 | 405 |
| bta-miR-2284w | -16.0 | 567 |
| bta-miR-2284w | -15.6 | 221 |
| bta-miR-2284w | -15.4 | 69  |
| bta-miR-2284w | -15.0 | 28  |
| bta-miR-2284w | -14.5 | 710 |
| bta-miR-2284w | -14.1 | 306 |
| bta-miR-2284w | -13.5 | 1   |
| bta-miR-2284w | -13.0 | 423 |
| bta-miR-2284w | -12.8 | 327 |
| bta-miR-2284w | -11.5 | 281 |
| bta-miR-2284w | -11.5 | 142 |

|               |       |     |
|---------------|-------|-----|
| bta-miR-2284w | -11.4 | 49  |
| bta-miR-2284w | -11.3 | 184 |
| bta-miR-2284w | -10.9 | 689 |
| bta-miR-2284w | -10.7 | 91  |
| bta-miR-2284w | -10.7 | 441 |
| bta-miR-2284w | -10.7 | 581 |
| bta-miR-2284w | -10.5 | 552 |
| bta-miR-2284w | -10.5 | 663 |
| bta-miR-2284w | -10.3 | 320 |
| bta-miR-3431  | -25.7 | 401 |
| bta-miR-3431  | -25.2 | 144 |
| bta-miR-3431  | -24.4 | 602 |
| bta-miR-3431  | -22.9 | 4   |
| bta-miR-3431  | -22.6 | 459 |
| bta-miR-3431  | -22.1 | 565 |
| bta-miR-3431  | -21.8 | 206 |
| bta-miR-3431  | -21.6 | 73  |
| bta-miR-3431  | -21.2 | 256 |
| bta-miR-3431  | -20.7 | 95  |
| bta-miR-3431  | -20.4 | 488 |
| bta-miR-3431  | -19.6 | 431 |
| bta-miR-3431  | -19.0 | 624 |
| bta-miR-3431  | -18.2 | 354 |
| bta-miR-3431  | -16.9 | 121 |
| bta-miR-3431  | -16.0 | 180 |
| bta-miR-3431  | -14.5 | 235 |
| bta-miR-3431  | -14.4 | 325 |
| bta-miR-3431  | -14.1 | 514 |
| bta-miR-3431  | -13.9 | 446 |
| bta-miR-3431  | -13.9 | 53  |
| bta-miR-3431  | -13.7 | 645 |
| bta-miR-3431  | -13.5 | 532 |
| bta-miR-3431  | -13.5 | 379 |
| bta-miR-3431  | -13.3 | 739 |
| bta-miR-3431  | -13.1 | 32  |
| bta-miR-3431  | -12.5 | 191 |
| bta-miR-3431  | -12.3 | 690 |
| bta-miR-3431  | -11.6 | 317 |
| bta-miR-3431  | -11.4 | 299 |
| bta-miR-3431  | -10.8 | 551 |
| bta-miR-3431  | -10.2 | 136 |
| bta-miR-2284x | -18.1 | 166 |
| bta-miR-2284x | -17.6 | 366 |
| bta-miR-2284x | -16.4 | 405 |
| bta-miR-2284x | -15.9 | 108 |
| bta-miR-2284x | -15.7 | 273 |
| bta-miR-2284x | -15.7 | 621 |
| bta-miR-2284x | -15.5 | 48  |
| bta-miR-2284x | -15.4 | 470 |
| bta-miR-2284x | -15.1 | 507 |
| bta-miR-2284x | -14.2 | 327 |
| bta-miR-2284x | -14.1 | 451 |
| bta-miR-2284x | -13.7 | 11  |
| bta-miR-2284x | -13.6 | 596 |
| bta-miR-2284x | -13.6 | 196 |
| bta-miR-2284x | -13.2 | 306 |
| bta-miR-2284x | -13.1 | 241 |
| bta-miR-2284x | -13.1 | 706 |
| bta-miR-2284x | -13.0 | 423 |

|               |       |     |
|---------------|-------|-----|
| bta-miR-2284x | -12.6 | 223 |
| bta-miR-2284x | -12.4 | 28  |
| bta-miR-2284x | -11.9 | 724 |
| bta-miR-2284x | -11.8 | 91  |
| bta-miR-2284x | -11.6 | 124 |
| bta-miR-2284x | -11.5 | 81  |
| bta-miR-2284x | -11.5 | 581 |
| bta-miR-2284x | -11.5 | 557 |
| bta-miR-2284x | -11.2 | 460 |
| bta-miR-2284x | -10.4 | 669 |
| bta-miR-2284x | -10.3 | 320 |
| bta-miR-2284x | -10.3 | 490 |
| bta-miR-2284x | -10.3 | 604 |
| bta-miR-2284x | -10.3 | 260 |
| bta-miR-2284x | -10.1 | 350 |
| bta-miR-3432  | -23.1 | 408 |
| bta-miR-3432  | -23.0 | 119 |
| bta-miR-3432  | -21.5 | 167 |
| bta-miR-3432  | -21.5 | 563 |
| bta-miR-3432  | -19.9 | 483 |
| bta-miR-3432  | -18.5 | 73  |
| bta-miR-3432  | -18.4 | 367 |
| bta-miR-3432  | -17.8 | 51  |
| bta-miR-3432  | -17.5 | 13  |
| bta-miR-3432  | -17.4 | 649 |
| bta-miR-3432  | -17.2 | 210 |
| bta-miR-3432  | -17.0 | 326 |
| bta-miR-3432  | -16.8 | 454 |
| bta-miR-3432  | -16.1 | 586 |
| bta-miR-3432  | -15.5 | 147 |
| bta-miR-3432  | -15.1 | 696 |
| bta-miR-3432  | -14.7 | 247 |
| bta-miR-3432  | -14.6 | 297 |
| bta-miR-3432  | -14.6 | 602 |
| bta-miR-3432  | -14.4 | 383 |
| bta-miR-3432  | -14.3 | 271 |
| bta-miR-3432  | -14.0 | 515 |
| bta-miR-3432  | -13.6 | 729 |
| bta-miR-3432  | -13.0 | 431 |
| bta-miR-3432  | -12.3 | 352 |
| bta-miR-3432  | -12.1 | 106 |
| bta-miR-3432  | -11.5 | 670 |
| bta-miR-3432  | -11.3 | 140 |
| bta-miR-3432  | -10.3 | 635 |
| bta-miR-3432  | -10.1 | 473 |
| bta-miR-3600  | -26.3 | 558 |
| bta-miR-3600  | -25.3 | 423 |
| bta-miR-3600  | -20.9 | 114 |
| bta-miR-3600  | -20.9 | 4   |
| bta-miR-3600  | -20.3 | 61  |
| bta-miR-3600  | -20.0 | 408 |
| bta-miR-3600  | -19.1 | 154 |
| bta-miR-3600  | -17.6 | 616 |
| bta-miR-3600  | -17.5 | 486 |
| bta-miR-3600  | -16.9 | 357 |
| bta-miR-3600  | -16.7 | 204 |
| bta-miR-3600  | -16.4 | 28  |
| bta-miR-3600  | -16.0 | 265 |
| bta-miR-3600  | -16.0 | 233 |

|              |       |     |
|--------------|-------|-----|
| bta-miR-3600 | -16.0 | 586 |
| bta-miR-3600 | -15.7 | 542 |
| bta-miR-3600 | -15.3 | 473 |
| bta-miR-3600 | -14.8 | 742 |
| bta-miR-3600 | -14.6 | 512 |
| bta-miR-3600 | -13.9 | 663 |
| bta-miR-3600 | -13.6 | 342 |
| bta-miR-3600 | -12.5 | 375 |
| bta-miR-3600 | -12.5 | 303 |
| bta-miR-3600 | -11.9 | 96  |
| bta-miR-3600 | -11.6 | 696 |
| bta-miR-3600 | -11.6 | 605 |
| bta-miR-3600 | -11.4 | 51  |
| bta-miR-3600 | -10.8 | 462 |
| bta-miR-3600 | -10.4 | 643 |
| bta-miR-3600 | -10.1 | 43  |
| bta-miR-2957 | -24.0 | 20  |
| bta-miR-2957 | -23.5 | 603 |
| bta-miR-2957 | -20.2 | 263 |
| bta-miR-2957 | -19.8 | 358 |
| bta-miR-2957 | -19.8 | 408 |
| bta-miR-2957 | -19.5 | 488 |
| bta-miR-2957 | -17.2 | 582 |
| bta-miR-2957 | -17.1 | 200 |
| bta-miR-2957 | -17.1 | 60  |
| bta-miR-2957 | -16.3 | 435 |
| bta-miR-2957 | -15.9 | 165 |
| bta-miR-2957 | -15.4 | 3   |
| bta-miR-2957 | -15.4 | 516 |
| bta-miR-2957 | -14.3 | 697 |
| bta-miR-2957 | -13.7 | 631 |
| bta-miR-2957 | -13.1 | 88  |
| bta-miR-2957 | -13.0 | 234 |
| bta-miR-2957 | -13.0 | 379 |
| bta-miR-2957 | -12.9 | 344 |
| bta-miR-2957 | -12.8 | 543 |
| bta-miR-2957 | -12.4 | 185 |
| bta-miR-2957 | -12.2 | 451 |
| bta-miR-2957 | -11.9 | 729 |
| bta-miR-2957 | -11.8 | 655 |
| bta-miR-2957 | -11.6 | 566 |
| bta-miR-2957 | -11.1 | 115 |
| bta-miR-2957 | -10.1 | 463 |
| bta-miR-3578 | -17.9 | 611 |
| bta-miR-3578 | -16.9 | 405 |
| bta-miR-3578 | -16.1 | 2   |
| bta-miR-3578 | -15.5 | 434 |
| bta-miR-3578 | -15.4 | 548 |
| bta-miR-3578 | -15.3 | 69  |
| bta-miR-3578 | -14.7 | 492 |
| bta-miR-3578 | -14.1 | 257 |
| bta-miR-3578 | -13.9 | 630 |
| bta-miR-3578 | -12.7 | 454 |
| bta-miR-3578 | -12.2 | 36  |
| bta-miR-3578 | -11.9 | 517 |
| bta-miR-3578 | -11.9 | 709 |
| bta-miR-3578 | -11.1 | 357 |
| bta-miR-3578 | -10.4 | 537 |
| bta-miR-3578 | -10.2 | 218 |

|              |       |     |
|--------------|-------|-----|
| bta-miR-3578 | -10.0 | 388 |
| bta-miR-3578 | -10.0 | 575 |
| bta-miR-409b | -27.9 | 16  |
| bta-miR-409b | -24.3 | 412 |
| bta-miR-409b | -23.7 | 616 |
| bta-miR-409b | -22.7 | 496 |
| bta-miR-409b | -22.6 | 229 |
| bta-miR-409b | -21.5 | 80  |
| bta-miR-409b | -20.0 | 546 |
| bta-miR-409b | -19.3 | 265 |
| bta-miR-409b | -19.2 | 454 |
| bta-miR-409b | -18.8 | 307 |
| bta-miR-409b | -16.9 | 344 |
| bta-miR-409b | -16.7 | 62  |
| bta-miR-409b | -16.5 | 583 |
| bta-miR-409b | -16.2 | 657 |
| bta-miR-409b | -15.6 | 130 |
| bta-miR-409b | -15.4 | 39  |
| bta-miR-409b | -15.1 | 519 |
| bta-miR-409b | -15.0 | 156 |
| bta-miR-409b | -15.0 | 185 |
| bta-miR-409b | -14.6 | 478 |
| bta-miR-409b | -14.4 | 696 |
| bta-miR-409b | -13.9 | 250 |
| bta-miR-409b | -13.9 | 376 |
| bta-miR-409b | -13.5 | 109 |
| bta-miR-409b | -13.5 | 743 |
| bta-miR-409b | -13.3 | 327 |
| bta-miR-409b | -13.1 | 172 |
| bta-miR-409b | -12.2 | 199 |
| bta-miR-409b | -12.2 | 429 |
| bta-miR-409b | -11.1 | 606 |
| bta-miR-409b | -10.9 | 293 |
| bta-miR-409b | -10.3 | 366 |
| bta-miR-409b | -10.2 | 404 |
| bta-miR-409b | -10.0 | 436 |
| bta-miR-3601 | -24.4 | 449 |
| bta-miR-3601 | -23.5 | 82  |
| bta-miR-3601 | -21.5 | 614 |
| bta-miR-3601 | -18.7 | 1   |
| bta-miR-3601 | -18.0 | 267 |
| bta-miR-3601 | -17.3 | 173 |
| bta-miR-3601 | -16.5 | 39  |
| bta-miR-3601 | -15.9 | 598 |
| bta-miR-3601 | -15.5 | 422 |
| bta-miR-3601 | -15.3 | 215 |
| bta-miR-3601 | -14.7 | 497 |
| bta-miR-3601 | -14.5 | 371 |
| bta-miR-3601 | -14.1 | 298 |
| bta-miR-3601 | -13.3 | 576 |
| bta-miR-3601 | -12.8 | 20  |
| bta-miR-3601 | -12.5 | 113 |
| bta-miR-3601 | -12.4 | 655 |
| bta-miR-3601 | -12.1 | 343 |
| bta-miR-3601 | -10.9 | 140 |
| bta-miR-3601 | -10.9 | 384 |
| bta-miR-3601 | -10.8 | 523 |
| bta-miR-3601 | -10.6 | 710 |
| bta-miR-3601 | -10.5 | 250 |

|              |       |     |
|--------------|-------|-----|
| bta-miR-3601 | -10.1 | 412 |
| bta-miR-3602 | -22.2 | 657 |
| bta-miR-3602 | -21.0 | 408 |
| bta-miR-3602 | -20.0 | 13  |
| bta-miR-3602 | -19.8 | 86  |
| bta-miR-3602 | -19.5 | 562 |
| bta-miR-3602 | -18.7 | 459 |
| bta-miR-3602 | -18.5 | 492 |
| bta-miR-3602 | -18.1 | 341 |
| bta-miR-3602 | -17.8 | 162 |
| bta-miR-3602 | -17.7 | 628 |
| bta-miR-3602 | -17.4 | 307 |
| bta-miR-3602 | -17.4 | 116 |
| bta-miR-3602 | -17.0 | 360 |
| bta-miR-3602 | -16.7 | 477 |
| bta-miR-3602 | -16.5 | 40  |
| bta-miR-3602 | -15.3 | 180 |
| bta-miR-3602 | -14.9 | 244 |
| bta-miR-3602 | -14.8 | 266 |
| bta-miR-3602 | -14.6 | 615 |
| bta-miR-3602 | -14.1 | 142 |
| bta-miR-3602 | -13.8 | 541 |
| bta-miR-3602 | -12.5 | 226 |
| bta-miR-3602 | -12.2 | 596 |
| bta-miR-3602 | -12.1 | 66  |
| bta-miR-3602 | -12.0 | 330 |
| bta-miR-3602 | -12.0 | 702 |
| bta-miR-3602 | -11.6 | 387 |
| bta-miR-3602 | -11.5 | 428 |
| bta-miR-3602 | -10.9 | 206 |
| bta-miR-3602 | -10.9 | 445 |
| bta-miR-3602 | -10.8 | 377 |
| bta-miR-3602 | -10.3 | 734 |
| bta-miR-26c  | -22.8 | 573 |
| bta-miR-26c  | -22.5 | 76  |
| bta-miR-26c  | -21.8 | 411 |
| bta-miR-26c  | -20.1 | 607 |
| bta-miR-26c  | -18.9 | 4   |
| bta-miR-26c  | -17.4 | 55  |
| bta-miR-26c  | -17.3 | 461 |
| bta-miR-26c  | -16.8 | 263 |
| bta-miR-26c  | -16.7 | 227 |
| bta-miR-26c  | -16.0 | 437 |
| bta-miR-26c  | -15.0 | 23  |
| bta-miR-26c  | -14.6 | 485 |
| bta-miR-26c  | -14.3 | 145 |
| bta-miR-26c  | -14.3 | 169 |
| bta-miR-26c  | -14.3 | 357 |
| bta-miR-26c  | -14.0 | 680 |
| bta-miR-26c  | -13.1 | 514 |
| bta-miR-26c  | -12.7 | 202 |
| bta-miR-26c  | -12.0 | 123 |
| bta-miR-26c  | -11.3 | 626 |
| bta-miR-26c  | -11.2 | 651 |
| bta-miR-26c  | -11.1 | 311 |
| bta-miR-26c  | -10.9 | 390 |
| bta-miR-26c  | -10.0 | 732 |
| bta-miR-3604 | -23.2 | 10  |
| bta-miR-3604 | -22.1 | 410 |



|              |       |     |
|--------------|-------|-----|
| bta-miR-3604 | -21.0 | 373 |
| bta-miR-3604 | -19.2 | 494 |
| bta-miR-3604 | -18.0 | 617 |
| bta-miR-3604 | -17.9 | 80  |
| bta-miR-3604 | -17.8 | 264 |
| bta-miR-3604 | -16.9 | 60  |
| bta-miR-3604 | -15.7 | 576 |
| bta-miR-3604 | -15.6 | 632 |
| bta-miR-3604 | -14.1 | 424 |
| bta-miR-3604 | -13.7 | 115 |
| bta-miR-3604 | -13.5 | 555 |
| bta-miR-3604 | -13.4 | 695 |
| bta-miR-3604 | -12.6 | 199 |
| bta-miR-3604 | -12.0 | 344 |
| bta-miR-3604 | -11.8 | 463 |
| bta-miR-3604 | -11.5 | 393 |
| bta-miR-3604 | -11.1 | 230 |
| bta-miR-3604 | -10.9 | 741 |
| bta-miR-3604 | -10.7 | 165 |
| bta-miR-3604 | -10.6 | 530 |
| bta-miR-3604 | -10.6 | 541 |
| bta-miR-3604 | -10.6 | 666 |
| bta-miR-3604 | -10.4 | 602 |
| bta-miR-3604 | -10.2 | 4   |
| bta-miR-3596 | -23.2 | 615 |
| bta-miR-3596 | -18.9 | 657 |
| bta-miR-3596 | -18.8 | 69  |
| bta-miR-3596 | -17.4 | 11  |
| bta-miR-3596 | -16.3 | 478 |
| bta-miR-3596 | -16.0 | 448 |
| bta-miR-3596 | -14.8 | 217 |
| bta-miR-3596 | -14.6 | 517 |
| bta-miR-3596 | -14.4 | 412 |
| bta-miR-3596 | -14.2 | 350 |
| bta-miR-3596 | -13.9 | 265 |
| bta-miR-3596 | -13.3 | 575 |
| bta-miR-3596 | -13.2 | 542 |
| bta-miR-3596 | -11.6 | 174 |
| bta-miR-3596 | -11.1 | 737 |
| bta-miR-3596 | -10.6 | 598 |

---

---
